# Supplementary material for: Construction of nine-membered N,N,O-heterocycles via Pd-catalyzed [6+3] dipolar cycloaddition
Source: Royal Society of Chemistry journal article supplement (doi:10.1039/d2cc03666e), 2022-01-01

## Supporting Information

### Construction of Nine-membered *N,N,O*-Heterocycles *via* Pd-catalyzed [6+3] Dipolar Cycloaddition

Hongling Xie,<sup>1</sup> Zhenkun Yang,<sup>1</sup> Luning Tang,<sup>1</sup> Zhengyu, Han,<sup>1,\*</sup> Jianwei  
Sun<sup>1,2,\*</sup> and Hai Huang<sup>1,\*</sup>

<sup>1</sup> *Jiangsu Key Laboratory of Advanced Catalytic Materials & Technology, School of  
Petrochemical Engineering, Changzhou University, Changzhou (China)*

<sup>2</sup> *Department of Chemistry, The Hong Kong University of Science and Technology,  
Clear Water Bay, Kowloon, Hong Kong SAR (China)*

## Table of Contents

|                                                              |            |
|--------------------------------------------------------------|------------|
| <b>I. General Information.....</b>                           | <b>S2</b>  |
| <b>II. Preparation of Substrates 1 and 2 .....</b>           | <b>S3</b>  |
| <b>III. Synthesis of the Nine-membered Heterocycles.....</b> | <b>S14</b> |
| <b>IV. Gram-scale Synthesis .....</b>                        | <b>S37</b> |

## NMR Specturm

## I. General Information

Flash column chromatography was performed over silica gel (200-300 mesh) purchased from Qindao Puke Co. Lit., China. All air or moisture sensitive reactions were conducted in oven-dried glassware under nitrogen atmosphere using anhydrous solvents. Anhydrous toluene, acetonitrile, dichloromethane, chloroform, methanol, and tetrahydrofuran were purified by the Innovative® solvent purification system. Other anhydrous solvents were purchased from J&K Scientific.  $^1\text{H}$ ,  $^{13}\text{C}$ , and  $^{19}\text{F}$  NMR spectra were collected on a Bruker AV 400 or AV 300 MHz NMR spectrometer using residue solvent peaks as an internal standard ( $^1\text{H}$  NMR:  $\text{CDCl}_3$  at 7.26 ppm,  $\text{DMSO-}d_6$  at 2.51 ppm;  $^{13}\text{C}$  NMR:  $\text{CDCl}_3$  at 77.15 ppm,  $\text{DMSO-}d_6$  at 39.5 ppm). HRMS spectra were performed on a Waters mass spectrometer.

## II. Preparation of Substrates 1 and 2

Substrates **1a**, **1c-1m** were synthesized according to the literature procedure.<sup>[1]</sup>

Substrates **1a**, **1f-1g** and **1i-1l** are known compounds.

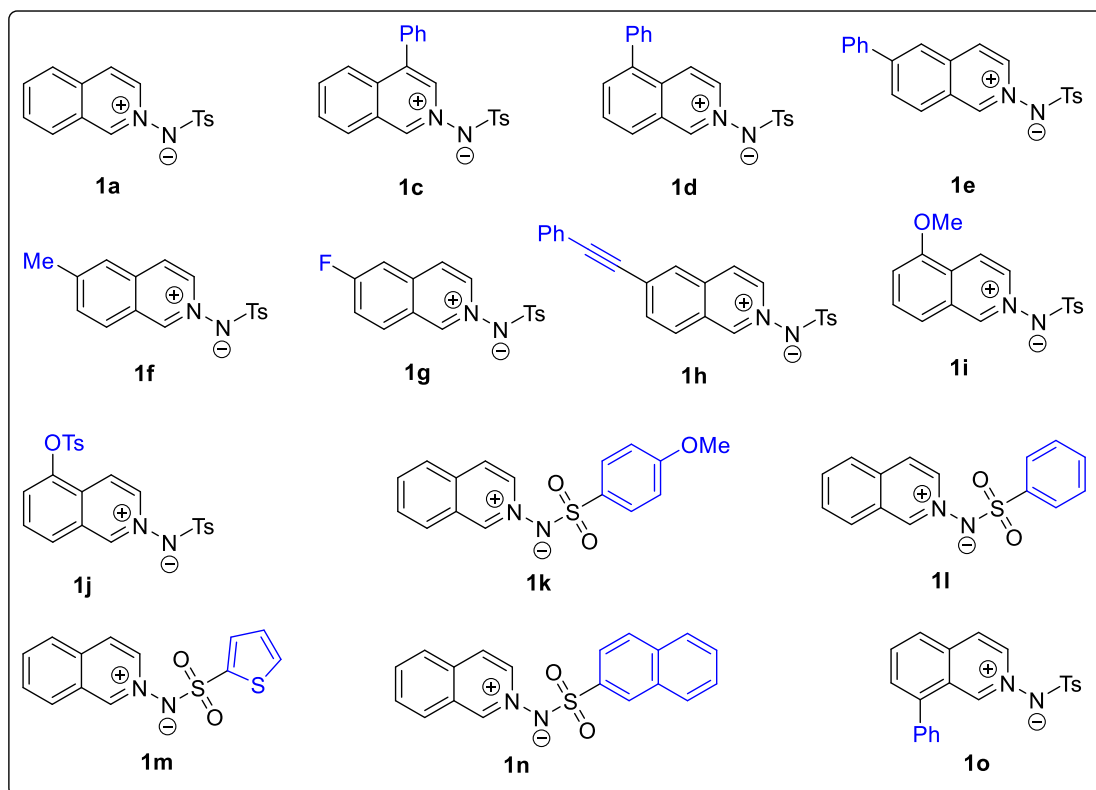

### General Procedure A: Preparation of *N*-Iminoisoquinolinium Ylides **1**.

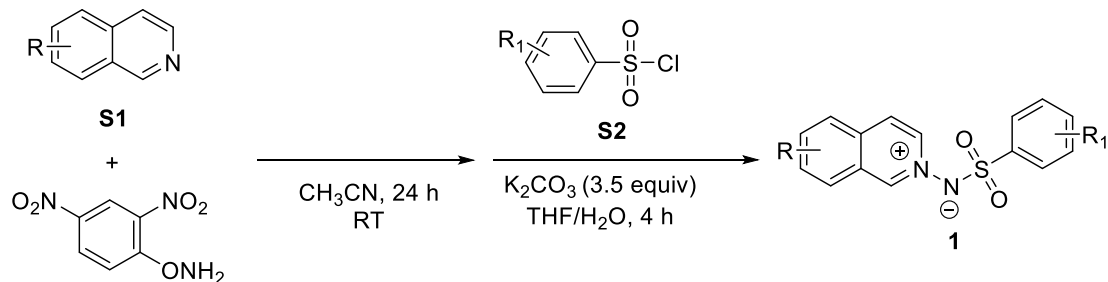

Under N<sub>2</sub> at room temperature, to a round-bottom flask charged with isoquinoline **S1** (1.30 g, 10 mmol, 1.0 equiv), O-(2,4-dinitrophenyl)hydroxylamine (2.19 g, 11 mmol, 1.1 equiv) and acetonitrile (40 mL). The mixture was allowed to stir for 24 h before it was filtered to give an orange precipitate. Then, dissolve the orange precipitate in

[1] P. Zhang, Y. Zhou, X. Han and J. Xu, H. Liu, *J. Org. Chem.* 2018, **83**, 3879-3888.

THF/H<sub>2</sub>O (30 mL, 1:1) followed by adding K<sub>2</sub>CO<sub>3</sub> (4.83 g, 35 mmol, 3.5 equiv) at room temperature. Next, arylsulfonyl chloride **S2** (20 mmol, 2 equiv) was added portion wise to the reaction mixture and stirred for another 4 h. The reaction mixture was diluted with water (20 mL) and extracted with dichloromethane (30 mL × 3). The combined organic layers were washed with water (30 mL × 2), dried over anhydrous Na<sub>2</sub>SO<sub>4</sub>, and concentrated under reduced pressure. The residue was purified by silica gel column chromatography (dichloromethane/EtOAc) to afford the desired *N*-iminoisoquinolinium ylides **1**.

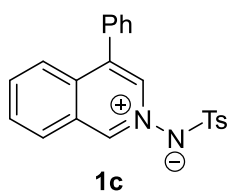

**(4-Phenylisoquinolin-2-ium-2-yl)(tosyl)amide (1c)** was prepared according to the General Procedure A as a yellow solid (chromatography eluent: dichloromethane/EtOAc = 5:1) in 35% yield (610 mg).

**M.P.** 196.2-197.4 °C.

**<sup>1</sup>H NMR** (300MHz, CDCl<sub>3</sub>) δ 9.30 (s, 1H), 8.12 (d, *J* = 7.5 Hz, 1H), 7.99-7.80 (m, 4H), 7.68 (d, *J* = 8.2 Hz, 2H), 7.54-7.51 (m, 3H), 7.32-7.28 (m, 2H), 7.18 (d, *J* = 8.0 Hz, 2H), 2.37 (s, 3H) ppm.

**<sup>13</sup>C NMR** (75MHz, CDCl<sub>3</sub>) δ 145.9, 141.6, 139.2, 138.5, 136.9, 134.4, 133.7, 133.2, 130.4, 129.8, 129.7, 129.4, 129.22, 129.20, 128.5, 127.4, 125.5, 21.5 ppm.

**HRMS** (CI+) calculated for C<sub>22</sub>H<sub>19</sub>N<sub>2</sub>O<sub>2</sub>S [M + H]<sup>+</sup>: 375.1167, found: 375.1165.

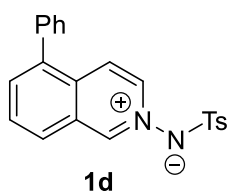

**(5-Phenylisoquinolin-2-ium-2-yl)(tosyl)amide (1d)** was prepared according



to the General Procedure A as a dark brown solid (chromatography eluent: dichloromethane/EtOAc = 5:1) in 33% yield (610 mg).

**M.P.** 214.6-216.6 °C.

**<sup>1</sup>H NMR** (300MHz, CDCl<sub>3</sub>) δ 9.33 (s, 1H), 8.08-8.04 (m, 2H), 7.91-7.86 (m, 3H), 7.68 (d, *J* = 8.2 Hz, 2H), 7.54-7.50 (m, 3H), 7.42-7.39 (m, 2H), 7.16 (d, *J* = 8.0 Hz, 2H), 2.35 (s, 3H) ppm.

**<sup>13</sup>C NMR** (75MHz, CDCl<sub>3</sub>) δ 146.9, 141.6, 140.3, 139.3, 137.7, 137.1, 134.6 133.0, 130.3, 129.8, 129.4, 129.1, 128.9, 128.7, 128.1, 127.3, 123.3, 21.5 ppm.

**HRMS** (CI+) calculated for C<sub>22</sub>H<sub>19</sub>N<sub>2</sub>O<sub>2</sub>S [M + H]<sup>+</sup>: 375.1167, found: 375.1169.

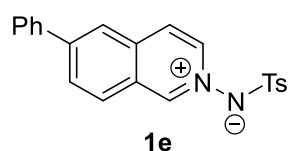

**(6-Phenylisoquinolin-2-ium-2-yl)(tosyl)amide (1e)** was prepared according to the General Procedure A as an orange red solid (chromatography eluent: dichloromethane/EtOAc = 5:1) in 65% yield (1.1 g).

**M.P.** 182.1-183 °C.

**<sup>1</sup>H NMR** (300MHz, CDCl<sub>3</sub>) δ 9.28 (s, 1H), 8.15-8.04 (m, 4H), 7.88 (d, *J* = 7.0 Hz, 1H), 7.73-7.64 (m, 4H), 7.57-7.48 (m, 3H), 7.16 (d, *J* = 8.0 Hz, 2H), 2.35 (s, 3H) ppm.

**<sup>13</sup>C NMR** (75MHz, CDCl<sub>3</sub>) δ 147.3, 147.0, 141.6, 139.2, 138.6, 138.3, 135.2, 130.3, 129.6, 129.5, 129.4, 129.3, 127.8, 127.3, 127.1, 124.7, 124.3, 21.5 ppm.

**HRMS** (CI+) calculated for C<sub>22</sub>H<sub>19</sub>N<sub>2</sub>O<sub>2</sub>S [M + H]<sup>+</sup>: 375.1167, found: 375.1165.

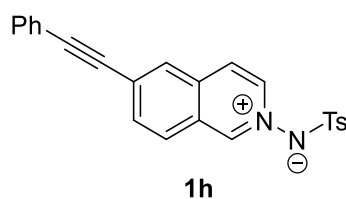

**(6-(Phenylethynyl)-isoquinolin-2-ium-2-yl)(tosyl)amide (1h)** was prepared according to the General Procedure A as a brown solid (chromatography

eluent: dichloromethane/EtOAc = 5:1) in 20% yield (310 mg).

**M.P.** 195.2-196.7 °C.

**<sup>1</sup>H NMR** (300MHz, CDCl<sub>3</sub>) δ 9.23 (s, 1H), 8.09 (t, *J* = 7.2 Hz, 2H), 8.00 (d, *J* = 8.6 Hz, 1H), 7.86 (dd, *J*<sub>1</sub> = 1.1, *J*<sub>2</sub> = 8.6 Hz, 1H), 7.78 (d, *J* = 7.0 Hz, 1H), 7.66 (d, *J* = 8.1 Hz, 2H), 7.60-7.58 (m, 2H), 7.44-7.41 (m, 3H), 7.17 (d, *J* = 8.0 Hz, 2H), 2.36 (s, 3H) ppm.

**<sup>13</sup>C NMR** (75MHz, CDCl<sub>3</sub>) δ 146.4, 141.8, 139.1, 138.4, 134.3, 133.2, 132.1, 129.9, 129.8, 129.5, 129.4, 128.8, 128.6, 127.3, 127.1, 124.1, 121.9, 96.1, 88.0, 21.5 ppm.

**HRMS** (CI<sup>+</sup>) calculated for C<sub>24</sub>H<sub>19</sub>N<sub>2</sub>O<sub>2</sub>S [M + H]<sup>+</sup>: 399.1167, found: 399.1168.

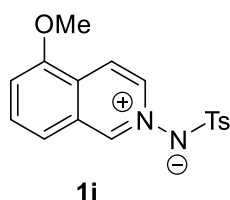

**(5-Methoxyisoquinolin-2-ium-2-yl)(tosyl)amide (1i):** was prepared according to the General Procedure A as a white solid (chromatography eluent: Dichloromethane/EtOAc = 5:1) in 49% yield (418 mg).

**M.P.** 228.8-230.1 °C.

**<sup>1</sup>H NMR** (300MHz, DMSO-*d*<sub>6</sub>) δ 9.49 (s, 1H), 8.23 (d, *J* = 7.1 Hz, 1H), 8.05 (dd, *J*<sub>1</sub> = 1.4 *J*<sub>2</sub> = 7.1 Hz 1H), 7.89-7.80 (m, 2H), 7.49 (d, *J* = 7.3 Hz 1H), 7.41 (d, *J* = 8.1 Hz 2H), 7.19 (d, *J* = 8.0 Hz, 2H), 4.01 (s, 3H), 2.29 (s, 3H) ppm.

**<sup>13</sup>C NMR** (101MHz, DMSO-*d*<sub>6</sub>) δ 153.8, 147.4, 140.8, 139.4, 137.2, 131.5, 129.2, 128.8, 126.6, 126.1, 120.2, 119.7, 112.7, 56.4, 20.9 ppm.

**HRMS** (CI<sup>+</sup>) calculated for C<sub>17</sub>H<sub>17</sub>N<sub>2</sub>O<sub>3</sub>S [M + H]<sup>+</sup>:329.0960, found: 329.0960.

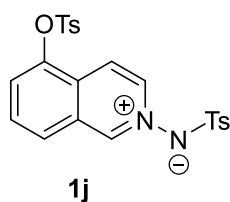

**Tosyl(5-(tosyloxy)isoquinolin-2-ium-2-yl)amide (1j):** was prepared according

to the General Procedure A as a white solid (chromatography eluent: Dichloromethane/EtOAc = 1:1) in 15% yield (320 mg).

**M.P.** 215.9-216.7 °C.

**<sup>1</sup>H NMR** (400MHz, CDCl<sub>3</sub>) δ 9.34 (s, 1H), 8.03 (dd, *J*<sub>1</sub> = 1.2, *J*<sub>2</sub> = 7.2 Hz 1H), 7.96 (d, *J* = 8.3 Hz, 1H), 7.82 (d, *J* = 7.2 Hz 1H), 7.76-7.72 (m, 3H), 7.66-7.61 (m, 3H), 7.34 (d, *J* = 8.2 Hz 2H), 7.17 (d, *J* = 8.1 Hz, 2H), 2.46 (s, 3H), 2.36 (s, 3H) ppm.

**<sup>13</sup>C NMR** (101MHz, CDCl<sub>3</sub>) δ 146.9, 145.5, 144.9, 142.0, 138.9, 138.0, 131.6, 130.8, 130.5, 129.5, 129.4, 128.7, 128.6, 127.4, 127.3, 126.5, 119.6, 22.0, 21.6 ppm.

**HRMS** (CI+) calculated for C<sub>23</sub>H<sub>21</sub>N<sub>2</sub>O<sub>5</sub>S<sub>2</sub> [M + H]<sup>+</sup>:469.0892, found: 469.0888.

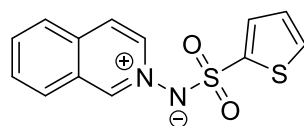

**1m**

**Isoquinolin-2-ium-2-yl(thiophen-2-ylsulfonyl)amide (1m)** was prepared according to the General Procedure A as a yellow solid (chromatography eluent: dichloromethane/EtOAc = 5:1) in 39% yield (110 mg).

**M.P.** 223.8-225.7 °C.

**<sup>1</sup>H NMR** (300MHz, DMSO-*d*<sub>6</sub>) δ 9.60 (s, 1H), 8.40 (d, *J* = 8.1 Hz, 1H), 8.30 (d, *J* = 7.0 Hz, 1H), 8.22 (dd, *J*<sub>1</sub> = 1.6, *J*<sub>2</sub> = 7.2 Hz, 2H), 8.08 (dd, *J*<sub>1</sub> = 1.1, *J*<sub>2</sub> = 7.0 Hz, 1H), 7.96-7.91 (m, 1H), 7.72 (dd, *J*<sub>1</sub> = 1.3, *J*<sub>2</sub> = 5.0 Hz, 1H), 7.23 (dd, *J*<sub>1</sub> = 1.3, *J*<sub>2</sub> = 3.6 Hz, 1H), 7.01 (dd, *J*<sub>1</sub> = 3.6, *J*<sub>2</sub> = 5.0 Hz, 1H) ppm.

**<sup>13</sup>C NMR** (75MHz, DMSO-*d*<sub>6</sub>) δ 148.2, 143.8, 137.7, 134.8, 134.7, 130.7, 130.5, 130.0, 129.1, 127.7, 127.2, 127.0, 125.3 ppm.

**HRMS** (CI+) calculated for C<sub>13</sub>H<sub>11</sub>N<sub>2</sub>O<sub>2</sub>S<sub>2</sub> [M + H]<sup>+</sup>: 292.0262, found: 292.0265.

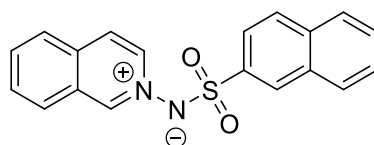

**1n**

**Isoquinolin-2-ium-2-yl(naphthalen-2-ylsulfonyl)amide (1n)** was prepared according to the General Procedure A as a yellow solid (chromatography eluent: dichloromethane/EtOAc = 5:1) in 50% yield (170 mg).

**M.P.** 233.1-234.7 °C.

**<sup>1</sup>H NMR** (300MHz, DMSO-*d*<sub>6</sub>) δ 9.60 (s, 1H), 8.35 (d, *J* = 8.2 Hz, 1H), 8.18 (t, *J* = 7.0 Hz, 2H), 8.09-7.87 (m, 7H), 7.71 (dd, *J*<sub>1</sub> = 1.8, *J*<sub>2</sub> = 8.6 Hz, 1H), 7.64-7.52 (m, 2H) ppm.

**<sup>13</sup>C NMR** (75MHz, DMSO-*d*<sub>6</sub>) δ 148.3, 139.5, 137.8, 134.7, 134.5, 133.6, 131.9, 130.5, 129.1, 128.9(2C), 127.8, 127.7, 127.6, 127.1, 127.0, 126.5, 125.3, 123.4 ppm.

**HRMS** (CI+) calculated for C<sub>19</sub>H<sub>15</sub>N<sub>2</sub>O<sub>2</sub>S [M + H]<sup>+</sup>: 335.0854, found: 335.0856.

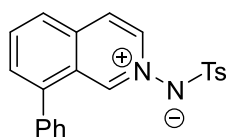

**1o**

**(8-Phenylisoquinolin-2-ium-2-yl)(tosyl)amide (1o)** was prepared according to the General Procedure A as a yellow solid (chromatography eluent: dichloromethane/EtOAc = 5:1) in 48% yield (830 mg).

**M.P.** 217.2-219.2 °C.

**<sup>1</sup>H NMR** (300MHz, CDCl<sub>3</sub>) δ 8.97 (s, 1H), 8.28 (dd, *J*<sub>1</sub> = 1.5, *J*<sub>2</sub> = 7.0 Hz, 1H), 7.98-7.95 (m, 3H), 7.72 (dd, *J*<sub>1</sub> = 2.2, *J*<sub>2</sub> = 6.1 Hz, 1H), 7.57-7.47 (m, 5H), 7.22-7.19 (m, 2H), 7.12 (d, *J* = 8.0 Hz, 2H), 2.38 (s, 3H) ppm.

**<sup>13</sup>C NMR** (75MHz, CDCl<sub>3</sub>) δ 146.3, 142.3, 141.4, 138.8, 138.3, 136.2, 135.2, 133.9, 131.0, 129.8, 129.3, 129.2, 129.1, 127.4, 126.5, 126.2, 124.9, 21.5 ppm.

**HRMS** (CI+) calculated for C<sub>22</sub>H<sub>19</sub>N<sub>2</sub>O<sub>2</sub>S [M + H]<sup>+</sup>: 375.1167, found: 375.1164.

## Preparation of *N*-Iminoisoquinolinium Ylide **1b**<sup>[2]</sup>.

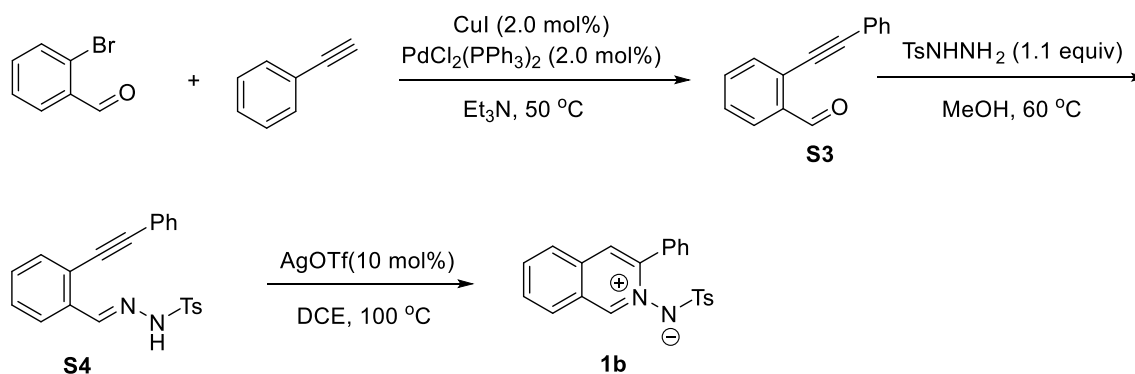

**2-(Phenylethynyl)benzaldehyde (S3):** Under N<sub>2</sub> at room temperature, to a round-bottom flask charged with 2-bromobenzaldehyde (1.85 g, 10 mmol, 1 equiv), CuI (38 mg, 0.2 mmol, 2.0 mol%), PdCl<sub>2</sub>(PPh<sub>3</sub>)<sub>2</sub> (140 mg, 0.2 mmol, 2.0 mol%) and Et<sub>3</sub>N (30 mL) was added ethynylbenzene (1.03 g, 10.5 mmol, 1.05 equiv) dropwise. The mixture was allowed to stir at 50 °C for 12 h before it was filtered through a pad of Celite rinsing with Et<sub>2</sub>O. The filtrate was concentrated under reduced pressure and purified by silica gel column chromatography (petroleum ether/EtOAc = 100:1) to afford **S3** in 70% yield (1.45 g).

**(*E*)-4-methyl-*N'*-(2-(phenylethynyl)benzylidene)benzenesulfonohydrazide (S4):** To a solution of TsNHNH<sub>2</sub> (1.43 g, 7.7 mmol, 1.1 equiv) in the methanol (10 mL) was added the carbonyl compound **S3** (1.45 g, 7.0 mmol, 1.0 equiv) at 60 °C. The mixture was stirred approximately 30 min to give the crude product as precipitate. Wash the precipitate with petroleum ether and dry in vacuo to afford **S4** in 70% yield (1.82 g).

**(3-Phenylisoquinolin-2-ium-2-yl)(tosyl)amide (1b):** A Mixture of **S4** (0.90 g, 2.4 mmol, 1.0 equiv), AgOTf (61.7 mg, 0.24 mmol, 10 mol %) and 30

[2] (a) F. Liu, J.-Y. Wang, P. Zhou, G. Li, W.-J. Hao and S.-J. Tu, B. Jiang, *Angew. Chem. Int. Ed.*, 2017, **56**, 15570-15574; (b) F. Ye, X. Ma, Q. Xiao, H. Li, Y. Zhang and J. Wang, *J. Am. Chem. Soc.*, 2012, **134**, 5742-5745; (c) C. Wu, Q. Wang, J. Zhao, P. Li and F. Shi, *Synthesis*, 2012, **44**, 3033-3042.

dichloroethane (30 mL) was stirred at 100°C for 2 h. Then, the reaction mixture was diluted with water (20 mL) and extracted with EtOAc (30 mL × 3). The combined organic layers were washed with water (30 mL × 2), dried over anhydrous Na<sub>2</sub>SO<sub>4</sub>, and concentrated under reduced pressure. The residue was purified by silica gel column chromatography (petroleum ether/EtOAc = 1:1) to afford the desired *N*-iminoisoquinolinium ylide **1b** in 59% yield (527.5 mg).

Substrates **2a-2k** were synthesized according to the literature procedure,<sup>[3]</sup> all of them are known compounds.

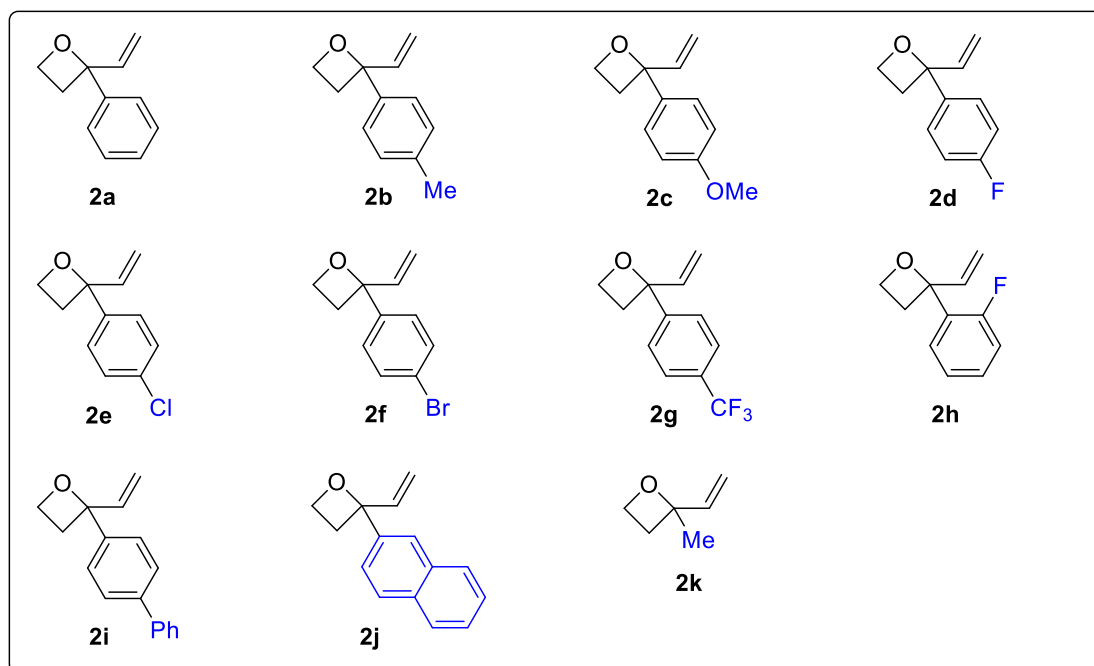

### General Procedure B: Preparation of 2-Vinyl Oxetanes **2**.

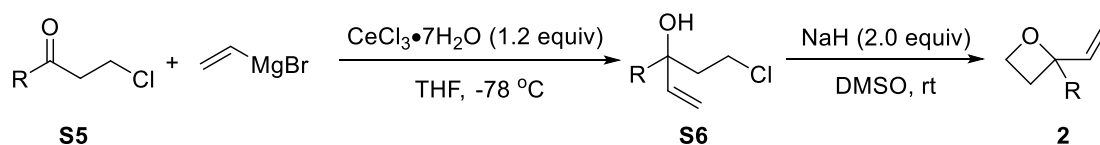

[3] (a) H. Uno, T. Imai, K.e Harada and N. Shibata, *ACS Catal.* 2020, **10**, 1454-1459; (b) B. Guo, G.g Schwarzwald and J. T. Njardarson, *Angew. Chem. Int. Ed.* 2012, **51**, 5675-5678.

**Allylic Alcohol (S6):** To a flame dried 200 mL round bottom flask was charged with cerium chloride ( $\text{CeCl}_3 \cdot 7\text{H}_2\text{O}$ ) (5.92 g, 24 mmol, 1.2 equiv) quickly. The flask was heated gradually to 140 °C in an oil bath under high vacuum and maintained at the same temperature for 2 h. Then the oil bath was removed and the flask was cooled to room temperature. THF (70 mL) was introduced with vigorous stirring. The suspension was well stirred under nitrogen at room temperature for 2 h. Then the mixture was cooled down to -78 °C followed by the addition of the vinyl magnesium bromide (1.0 M in THF, 30 mL, 1.2 equiv) via syringe. After being stirred for another 2 h at -78 °C, the corresponding  $\beta$ -chloro ketone **S5** (20 mmol, 1.0 equiv) in THF (50 mL) was added via syringe slowly. The reaction was maintained at -78 °C for 3 h, TLC indicated that all of the starting material was consumed. The reaction was quenched with 50 mL sat.  $\text{NaHCO}_3$ . After separation, the aqueous layer was extracted with ether (3 x 15 mL). The combined organic layer was washed with water (30 mL), brine (30 mL), dried over anhydrous  $\text{Na}_2\text{SO}_4$ , and concentrated under reduced pressure. The crude product was purified by flash column chromatography on silica gel to give the corresponding products **S6**.

**2-Vinyl Oxetanes (2):** To a 50 mL flame-dried round bottom flask charged with anhydrous DMSO (30 mL) and the corresponding allylic alcohol **S6** (4.2 mmol, 1.0 equiv).  $\text{NaH}$  (60% suspension in mineral oil, 336 mg, 8.4 mmol, 2.0 equiv) was added in one portion. Reaction was stirred at room temperature for 30 minutes. The reaction was then cooled down to 0 °C and quenched with sat.  $\text{NaHCO}_3$  (15 mL) carefully. After separation, the aqueous layer was extracted with ethyl acetate (3 x 10 mL). The combined organic layer was washed with water (15 mL), brine (15 mL), dried over anhydrous  $\text{Na}_2\text{SO}_4$ , and concentrated under reduced pressure. The crude product was purified by flash column chromatography to give the products **2**.

**2-phenyl-2-vinyloxetane (2a)** was prepared according to the General Procedure B as a colorless oil (chromatography eluent: petroleum ether/EtOAc = 20:1) in 71% yield (464.7 mg).

**2-(*p*-Tolyl)-2-vinyloxetane (2b)** was prepared according to the General Procedure B as a colorless oil (chromatography eluent: petroleum ether/EtOAc = 20:1) in 76% yield (953.4 mg).

**2-(4-Methoxyphenyl)-2-vinyloxetane (2c)** was prepared according to the General Procedure B as a colorless oil (chromatography eluent: petroleum ether/EtOAc = 20:1) in 61% yield (656.1 mg).

**2-(4-Fluorophenyl)-2-vinyloxetane (2d)** was prepared according to the General Procedure B as a colorless oil (chromatography eluent: petroleum ether/EtOAc = 20:1) in 90% yield (129 mg).

**2-(4-Chlorophenyl)-2-vinyloxetane (2e)** was prepared according to the General Procedure B as a colorless oil (chromatography eluent: petroleum ether/EtOAc = 20:1) in 76% yield (665 mg).

**2-(4-Bromophenyl)-2-vinyloxetane (2f)** was prepared according to the General Procedure B as a colorless oil (chromatography eluent: petroleum ether/EtOAc = 20:1) in 65% yield (837.5 mg).

**2-(4-(Trifluoromethyl)phenyl)-2-vinyloxetane (2g)** was prepared according to the General Procedure B as a colorless oil (chromatography eluent: petroleum ether/EtOAc = 20:1) in 94% yield (1.56 g).

**2-(2-Fluorophenyl)-2-vinyloxetane (2h)** was prepared according to the



General Procedure B as a colorless oil (chromatography eluent: petroleum ether/EtOAc = 20:1) in 99% yield (769.8 mg).

**2-([1,1'-Biphenyl]-4-yl)-2-vinyloxetane (2i)** was prepared according to the General Procedure B as a colorless oil (chromatography eluent: petroleum ether/EtOAc = 20:1) in 84% yield (498.1 mg).

**2-(Naphthalen-2-yl)-2-vinyloxetane (2j)** was prepared according to the General Procedure B as a colorless oil (chromatography eluent: petroleum ether/EtOAc = 20:1) in 50% yield (489.5 mg).

**2-Methyl-2-vinyloxetane (2k)** was prepared according to the General Procedure B as a colorless oil (chromatography eluent: petroleum ether/EtOAc = 20:1) in 46% yield (448.8 mg).

### III. Synthesis of the Nine-membered Heterocycles

#### General Procedure C:

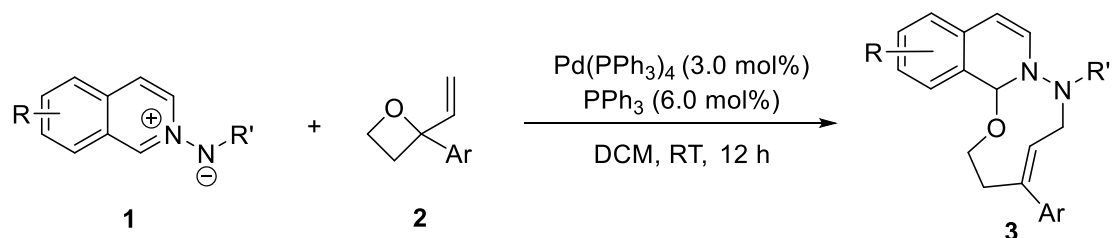

Under N<sub>2</sub> at room temperature, to a solution of *N*-iminoisoquinolinium ylides **1** (0.30 mmol, 1.0 equiv) and oxetane **2** (0.9 mmol, 3.0 equiv) in DCM (3.0 mL) was added Pd(PPh<sub>3</sub>)<sub>4</sub> (10.4 mg, 0.009 mmol, 5.0 mol%) and PPh<sub>3</sub> (4.7 mg, 0.018 mmol, 10 mol%). The reaction mixture was stirred at room temperature for 12 h. The reaction mixture was directly concentrated and purified by silica gel column chromatography (petroleum ether/EtOAc) to afford the desired product **3**.

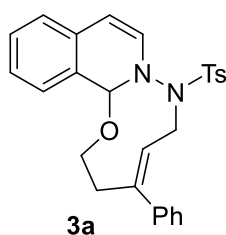

**(E)-4-Phenyl-7-tosyl-2,3,6,7-tetrahydro-14bH-[1,3,4]xadiazonino[2,3-a]isoquinoline (3a)** was prepared according to the General Procedure C as a light yellow solid (chromatography eluent: petroleum ether/EtOAc = 10:1) in 98% yield (134.8 mg).

**M.P.** 136.2-137.0 °C.

**<sup>1</sup>H NMR** (300MHz, CDCl<sub>3</sub>) δ 7.68 (d, *J* = 8.2 Hz, 2H), 7.29-7.23 (m, 8H), 7.17-7.09 (m, 2H), 7.03 (d, *J* = 7.6 Hz, 1H), 6.05 (d, *J* = 7.7 Hz, 1H), 5.99 (s, 1H), 5.91 (t, *J* = 7.9 Hz, 1H), 5.4 (d, *J* = 7.7 Hz, 1H), 4.84 (q, *J* = 8.8 Hz, 1H), 4.5 (q, *J* =

7.1 Hz, 1H), 3.52-3.45 (m, 1H), 3.23 (t,  $J = 9.1$  Hz, 1H), 3.00 (t,  $J = 12.8$  Hz, 1H), 2.55 (dt,  $J_1 = 4.1$ ,  $J_2 = 10.5$  Hz, 1H), 2.42 (s, 3H) ppm.

$^{13}\text{C}$  NMR (75MHz,  $\text{CDCl}_3$ )  $\delta$  146.8, 144.4, 143.2, 135.6, 134.8, 131.9, 129.9, 128.8, 128.5, 128.3, 127.9, 127.6, 127.6, 126.5, 125.8, 124.1, 121.8, 99.4, 88.8, 63.5, 49.2, 33.0, 21.7 ppm.

HRMS (CI+) calculated for  $\text{C}_{27}\text{H}_{27}\text{N}_2\text{O}_3\text{S}$   $[\text{M} + \text{H}]^+$ : 459.1742, found: 459.1741.

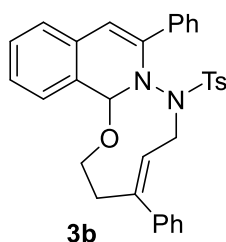

(*E*)-4,9-Diphenyl-7-tosyl-2,3,6,7-tetrahydro-14*b*H-[1,3,4]oxadiazonino[2,3-*a*]isquinoline (**3b**) was prepared according to the General Procedure C as a light yellow solid (chromatography eluent: petroleum ether/EtOAc = 10:1) in 96% yield (154.0 mg).

M.P. 142.0-143.1 °C.

$^1\text{H}$  NMR (300MHz,  $\text{CDCl}_3$ )  $\delta$  7.42-7.08 (m, 14H), 7.01 (d,  $J = 6.8$  Hz, 4H), 6.32 (q,  $J = 6.6$  Hz, 1H), 6.19 (s, 1H), 5.70 (s, 1H), 4.79-4.64 (m, 2H), 3.81-3.75 (m, 1H), 3.61 (q,  $J = 9.4$  Hz, 1H), 3.20-3.14 (m, 1H), 2.79(dd,  $J_1 = 5.1$ ,  $J_2 = 14.7$  Hz, 1H), 2.42 (s, 3H) ppm.

$^{13}\text{C}$  NMR (75MHz,  $\text{CDCl}_3$ )  $\delta$  144.1, 144.0, 143.2, 142.7, 136.1, 135.1, 130.5, 129.4, 128.9, 128.8, 128.7, 128.68, 128.60, 128.1, 128.0, 127.5, 127.1, 125.9, 125.5, 124.9, 124.2, 104.8, 90.3, 63.9, 52.5, 33.7, 21.7 ppm.

HRMS (CI+) calculated for  $\text{C}_{33}\text{H}_{31}\text{N}_2\text{O}_3\text{S}$   $[\text{M} + \text{H}]^+$ : 535.2055, found: 535.2057.

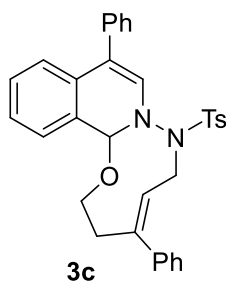

(*E*)-4,10-Diphenyl-7-tosyl-2,3,6,7-tetrahydro-14*b*H-[1,3,4]oxadiazonino[2,3-*a*]isoquinoline (**3c**) was prepared according to the General Procedure C as a light yellow solid (chromatography eluent: petroleum ether/EtOAc = 10:1) in 49% yield (78.4 mg).

**M.P.** 132.9-134.0 °C.

<sup>1</sup>H NMR (300MHz, CDCl<sub>3</sub>) δ 7.70 (d, *J* = 8.3 Hz, 2H), 7.30-7.17 (m, 13H), 7.13-7.10 (m, 1H), 6.98 (td, *J*<sub>1</sub> = 2.5, *J*<sub>2</sub> = 4.4 Hz, 2H), 6.12 (d, *J* = 0.7 Hz, 1H), 5.89 (d, *J* = 1.2 Hz, 1H), 5.82 (t, *J* = 7.6 Hz, 1H), 4.88 (q, *J* = 8.0 Hz, 1H), 4.42 (q, *J* = 7.2 Hz, 1H), 3.63-3.57 (m, 1H), 3.39 (td, *J*<sub>1</sub> = 2.3, *J*<sub>2</sub> = 9.1 Hz, 1H), 3.15(td, *J*<sub>1</sub> = 2.6, *J*<sub>2</sub> = 9.1 Hz, 1H), 2.63-2.56 (m, 1H), 2.42 (s, 3H) ppm.

<sup>13</sup>C NMR (75MHz, CDCl<sub>3</sub>) δ 146.6, 144.5, 142.7, 137.2, 135.1, 132.6, 131.6, 129.9, 129.5, 128.6, 128.5, 128.4, 128.3, 128.26, 128.21, 127.6, 126.8, 126.6, 126.3, 122.9, 121.4, 113.5, 89.6, 64.1, 48.9, 33.1, 21.7 ppm.

**HRMS** (CI<sup>+</sup>) calculated for C<sub>33</sub>H<sub>31</sub>N<sub>2</sub>O<sub>3</sub>S [M + H]<sup>+</sup>: 535.2055, found: 535.2064.

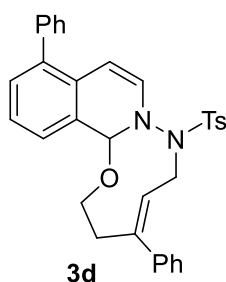

(*E*)-4,11-Diphenyl-7-tosyl-2,3,6,7-tetrahydro-14*b*H-[1,3,4]oxadiazonino[2,3-*a*]isoquinoline (**3d**) was prepared according to the General Procedure C as a light yellow solid (chromatography eluent: petroleum ether/EtOAc = 10:1) in 44% yield (71.0 mg).

**M.P.** 145.9-146.4 °C.

**<sup>1</sup>H NMR** (300MHz, CDCl<sub>3</sub>) δ 7.68 (d, *J* = 8.3 Hz, 2H), 7.43-7.18 (m, 14H), 7.10 (dd, *J*<sub>1</sub> = 2.0, *J*<sub>2</sub> = 7.0 Hz, 1H), 6.00(s, 1H), 5.97 (dd, *J*<sub>1</sub> = 1.3, *J*<sub>2</sub> = 7.9 Hz, 1H), 5.90 (t, *J* = 7.7 Hz, 1H), 5.46 (d, *J* = 7.9 Hz, 1H), 4.84 (q, *J* = 8.1 Hz, 1H), 4.42 (q, *J* = 13.6 Hz, 1H), 3.60-3.53 (m, 1H), 3.35 (td, *J*<sub>1</sub> = 2.4, *J*<sub>2</sub> = 8.8 Hz, 1H), 3.07 (td, *J*<sub>1</sub> = 2.6, *J*<sub>2</sub> = 14.3 Hz, 1H), 2.64-2.57 (m, 1H), 2.42 (s, 3H) ppm.

**<sup>13</sup>C NMR** (75MHz, CDCl<sub>3</sub>) δ 146.4, 144.5, 143.0, 140.6, 137.0, 135.3, 134.0, 130.2, 129.9(3C), 129.2, 128.5, 128.4, 128.2, 127.6, 127.2, 127.1, 126.6, 125.7, 121.7, 97.8, 89.5, 64.0, 49.1, 33.1, 21.8 ppm.

**HRMS** (CI+) calculated for C<sub>33</sub>H<sub>31</sub>N<sub>2</sub>O<sub>3</sub>S [M + H]<sup>+</sup>: 535.2055, found: 535.2062.

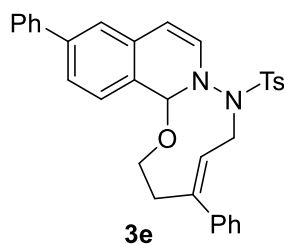

**(E)-4,12-Diphenyl-7-tosyl-2,3,6,7-tetrahydro-14bH-[1,3,4]oxadiazonino[2,3-a]isoquinoline (3e)** was prepared according to the General Procedure C as a light yellow solid (chromatography eluent: petroleum ether/EtOAc = 10:1) in 46% yield (74.1 mg).

**M.P.** 156.7-158.0 °C.

**<sup>1</sup>H NMR** (300MHz, CDCl<sub>3</sub>) δ 7.70 (d, *J* = 8.2 Hz, 2H), 7.58(d, *J* = 7.2 Hz, 2H), 7.45-7.25 (m, 12H), 7.18 (d, *J* = 8.0 Hz, 1H), 6.06 (t, *J* = 7.8 Hz, 2H), 5.90 (t, *J* = 7.8 Hz, 1H), 5.44 (d, *J* = 7.7 Hz, 1H), 4.86 (q, *J* = 8.7 Hz, 1H), 4.50 (q, *J* = 7.1 Hz, 1H), 3.57-3.50 (m, 1H), 3.29 (t, *J* = 7.0 Hz, 1H), 3.04 (t, *J* = 12.7 Hz, 1H), 2.57 (dt, *J*<sub>1</sub> = 3.8, *J*<sub>2</sub> = 10.8 Hz, 1H), 2.42 (s, 3H) ppm.

**<sup>13</sup>C NMR** (75MHz, CDCl<sub>3</sub>) δ 146.9, 144.5, 143.1, 141.7, 140.9, 135.6, 135.1, 132.3, 130.0, 128.9, 128.5(2C), 128.3, 127.6, 127.5, 127.3, 126.6, 126.5, 124.8, 122.8, 121.7, 99.4, 88.8, 63.7, 49.2, 33.1, 21.8 ppm.

HRMS (CI+) calculated for C<sub>33</sub>H<sub>31</sub>N<sub>2</sub>O<sub>3</sub>S [M + H]<sup>+</sup>: 535.2055, found: 535.2062.

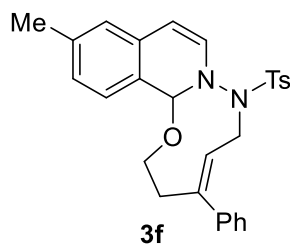

(*E*)-12-Methyl-4-phenyl-7-tosyl-2,3,6,7-tetrahydro-14*bH*-[1,3,4]oxadiazonino[2,3-*a*]isoquinoline (**3f**) was prepared according to the General Procedure C as a light yellow solid (chromatography eluent: petroleum ether/EtOAc = 10:1) in 94% yield (133.3 mg).

M.P. 122.2-123.8 °C.

<sup>1</sup>H NMR (300MHz, CDCl<sub>3</sub>) δ 7.68 (d, *J* = 8.2 Hz, 2H), 7.28-7.23 (m, 7H), 6.98 (q, *J* = 7.8 Hz, 2H), 6.84 (s, 1H), 6.03 (d, *J* = 7.7 Hz, 1H), 5.97 (s, 1H), 5.90 (t, *J* = 8.0 Hz, 1H), 5.32 (d, *J* = 7.7 Hz, 1H), 4.83 (q, *J* = 9.0 Hz, 1H), 4.51 (q, *J* = 7.1 Hz, 1H), 3.49-3.43 (m, 1H), 3.21 (t, *J* = 6.9 Hz, 1H), 2.97 (t, *J* = 16.9 Hz, 1H), 2.53 (dd, *J*<sub>1</sub> = 4.2, *J*<sub>2</sub> = 14.5 Hz, 1H), 2.42 (s, 3H), 2.32 (s, 3H) ppm.

<sup>13</sup>C NMR (75MHz, CDCl<sub>3</sub>) δ 146.9, 144.4, 143.3, 138.6, 135.8, 135.1, 131.9, 129.9, 128.5, 128.3, 127.8, 127.6, 126.8, 126.5, 124.9, 124.5, 121.9, 99.2, 88.6, 63.3, 49.3, 33.1, 21.7, 21.4 ppm.

HRMS (CI+) calculated for C<sub>28</sub>H<sub>29</sub>N<sub>2</sub>O<sub>3</sub>S [M + H]<sup>+</sup>: 473.1899, found: 473.1902.

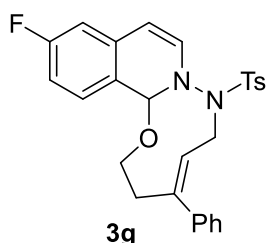

(*E*)-12-Fluoro-4-phenyl-7-tosyl-2,3,6,7-tetrahydro-14*bH*-[1,3,4]oxadiazonino[2,3-*a*]isoquinoline (**3g**) was prepared according to the General Procedure C as a light yellow solid (chromatography eluent: petroleum ether/EtOAc = 10:1) in

95% yield (135.5 mg).

**M.P.** 159.4-160.2 °C.

**<sup>1</sup>H NMR** (300MHz, CDCl<sub>3</sub>) δ 7.67 (d, *J* = 8.3 Hz, 2H), 7.29-7.24 (m, 7H), 7.08 (q, *J* = 5.6 Hz, 1H), 6.83 (td, *J*<sub>1</sub> = 2.6, *J*<sub>2</sub> = 8.5 Hz, 1H), 6.70 (dd, *J*<sub>1</sub> = 2.5, *J*<sub>2</sub> = 9.6 Hz, 1H), 6.06 (d, *J* = 7.7 Hz, 1H), 6.00 (s, 1H), 5.89 (t, *J* = 7.8 Hz, 1H), 5.32 (d, *J* = 7.7 Hz, 1H), 4.83 (q, *J* = 8.8 Hz, 1H), 4.47 (q, *J* = 7.1 Hz, 1H), 3.52-3.46 (m, 1H), 3.22 (td, *J*<sub>1</sub> = 2.2, *J*<sub>2</sub> = 8.9 Hz, 1H), 3.02 (td, *J*<sub>1</sub> = 2.2, *J*<sub>2</sub> = 8.9 Hz, 1H), 2.59-2.51 (m, 1H), 2.43 (s, 3H) ppm.

**<sup>13</sup>C NMR** (75MHz, CDCl<sub>3</sub>) δ 163.0 (d, *J* = 244.5 Hz), 147.0, 144.6, 143.0, 135.6 (d, *J* = 27.8 Hz), 134.0 (d, *J* = 9.0 Hz), 129.9 (d, *J* = 6.8 Hz), 129.7, 128.5, 128.3, 127.7, 126.4, 123.6, 123.5, 121.6, 113.0 (d, *J* = 22.5 Hz), 110.0 (d, *J* = 21.8 Hz), 98.6, 88.4, 63.5, 49.1, 33.0, 21.7 ppm.

**<sup>19</sup>F NMR** (282MHz, CDCl<sub>3</sub>) δ -113.4 ppm.

**HRMS** (CI<sup>+</sup>) calculated for C<sub>27</sub>H<sub>26</sub>FN<sub>2</sub>O<sub>3</sub>S [M + H]<sup>+</sup>: 477.1648, found: 477.1651.

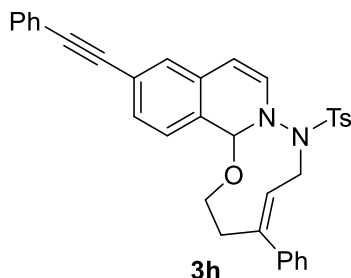

**(E)-4-Phenyl-12-(phenylethynyl)-7-tosyl-2,3,6,7-tetrahydro-14bH-[1,3,4]oxadiazonino[2,3-a]isoquinoline (3h)** was prepared according to the General Procedure C as a light yellow solid (chromatography eluent: petroleum ether/EtOAc = 10:1) in 66% yield (110.3 mg).

**M.P.** 152.9-154.1 °C.

**<sup>1</sup>H NMR** (300MHz, CDCl<sub>3</sub>) δ 7.67 (d, *J* = 8.2 Hz, 2H), 7.52 (dd, *J*<sub>1</sub> = 4.0, *J*<sub>2</sub> = 7.5 Hz, 2H), 7.35-7.23 (m, 12H), 7.09 (q, *J* = 8.0 Hz, 1H), 6.06 (d, *J* = 7.7 Hz, 1H), 5.98 (s, 1H), 5.91 (t, *J* = 7.9 Hz, 1H), 5.37 (d, *J* = 7.7 Hz, 1H), 4.84 (q, *J* = 8.8 Hz, 1H), 4.48 (q, *J* = 7.2 Hz, 1H), 3.54-3.47 (m, 1H), 3.25 (t, *J* = 6.7 Hz, 1H), 3.01 (t, *J* =

12.9 Hz, 1H), 2.60-2.53 (m, 1H), 2.43 (s, 3H) ppm.

<sup>13</sup>C NMR (75MHz, CDCl<sub>3</sub>) δ 146.9, 144.6, 143.0, 135.4, 132.0(2C), 131.8, 130.0, 128.8, 128.5, 128.4(2C), 128.3, 128.0, 127.7, 127.4, 127.2, 126.5, 123.8, 123.3, 121.8, 98.8, 89.7, 89.2, 88.5, 63.6, 49.1, 33.0, 21.8 ppm.

HRMS (CI<sup>+</sup>) calculated for C<sub>35</sub>H<sub>31</sub>N<sub>2</sub>O<sub>3</sub>S [M + H]<sup>+</sup>: 559.2055, found: 559.2065.

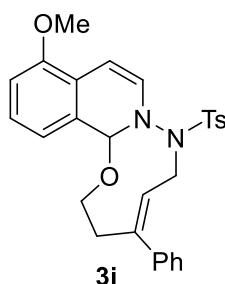

**(E)-11-Methoxy-4-phenyl-7-tosyl-2,3,6,7-tetrahydro-14bH-[1,3,4]oxadiazonin o[2,3-a]isoquinoline (3i):** was prepared according to the General Procedure C as a light yellow solid (chromatography eluent: petroleum ether/EtOAc = 10:1) in 75% yield (100.8 mg).

**M.P.** 140.2-141.7 °C.

<sup>1</sup>H NMR (400MHz, CDCl<sub>3</sub>) δ 7.69 (d, *J* = 8.2 Hz 2H), 7.31-7.24 (m, 7H), 7.11 (d, *J* = 7.9 Hz, 1H), 6.76 (q, *J* = 8.0 Hz, 2H), 6.05 (dd, *J*<sub>1</sub> = 1.0, *J*<sub>2</sub> = 6.8 Hz 1H), 5.99 (s, 1H) 5.91 (t, *J* = 7.9 Hz, 1H), 5.74 (d, *J* = 7.9 Hz, 1H), 4.84 (q, *J* = 8.8 Hz, 1H), 4.48 (q, *J* = 7.2 Hz, 1H), 3.83 (s, 3H), 3.51-3.45 (m, 1H), 3.27-3.21 (m, 1H), 3.02-2.97 (m, 1H), 2.59-2.53 (m, 1H), 2.42 (s, 3H) ppm.

<sup>13</sup>C NMR (101MHz, CDCl<sub>3</sub>) δ 153.0, 146.8, 144.4, 143.1, 135.6, 133.9, 129.9, 128.6, 128.5, 128.3, 127.6, 126.5, 126.4, 121.8, 120.1, 109.6, 93.6, 88.6, 63.4, 55.6, 49.1, 33.0, 29.8, 21.7 ppm.

HRMS (CI<sup>+</sup>) calculated for C<sub>28</sub>H<sub>29</sub>N<sub>2</sub>O<sub>4</sub>S [M + H]<sup>+</sup>:489.1848, found: 489.1848.



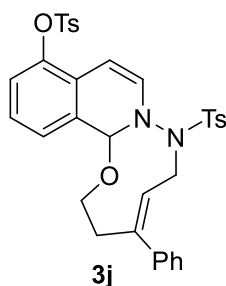

**(E)-4-Phenyl-7-tosyl-2,3,6,7-tetrahydro-14bH-[1,3,4]oxadiazonino[2,3-a]isoquinolin-11-yl 4-methylbenzenesulfonate (3j):** was prepared according to the General Procedure A as a white solid (chromatography eluent: petroleum ether/EtOAc = 10:1) in 90% yield (169.5 mg).

**M.P.** 157.7-160.7 °C.

<sup>1</sup>H NMR (400MHz, CDCl<sub>3</sub>) δ 7.66 (d, *J* = 8.3 Hz 2H), 7.60 (d, *J* = 8.2 Hz 2H), 7.35-7.28 (m, 4H), 7.25-7.23 (m, 3H), 7.15-7.05 (m, 4H), 6.98 (d, *J* = 7.2 Hz, 1H), 5.98 (dd, *J*<sub>1</sub> = 0.9, *J*<sub>2</sub> = 7.9 Hz 1H), 5.89 (s, 1H) 5.84 (t, *J* = 7.8 Hz, 1H), 5.42 (d, *J* = 7.9 Hz, 1H), 4.76 (q, *J* = 8.7 Hz, 1H), 4.39 (q, *J* = 7.2 Hz, 1H), 3.36-3.32 (m, 1H), 2.96-2.93 (m, 2H), 2.49 (q, *J* = 6.5 Hz, 1H), 2.43 (s, 3H), 2.32 (s, 3H) ppm.

<sup>13</sup>C NMR (101MHz, CDCl<sub>3</sub>) δ 146.9, 145.5, 144.7, 143.2, 143.0, 135.5, 135.0, 132.6, 130.0, 129.8, 129.4, 128.6, 128.5, 128.3, 127.8, 126.7, 126.6, 126.1, 125.9, 122.2, 121.6, 93.0, 87.8, 63.2, 48.7, 33.0, 21.8, 21.7 ppm.

**HRMS** (CI<sup>+</sup>) calculated for C<sub>34</sub>H<sub>33</sub>N<sub>2</sub>O<sub>6</sub>S<sub>2</sub> [M + H<sup>+</sup>]:629.1780, found: 629.1780.

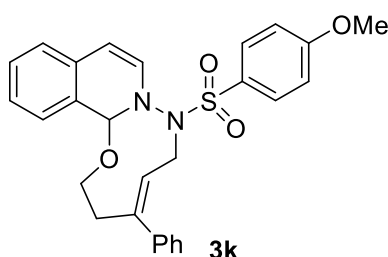

**(E)-7-((4-Methoxyphenyl)sulfonyl)-4-phenyl-2,3,6,7-tetrahydro-14bH-[1,3,4]oxadiazonino[2,3-a]isoquinoline (3k)** was prepared according to the General Procedure C as a light yellow solid (chromatography eluent: petroleum ether/EtOAc = 10:1) in 85% yield (120.8 mg).

**M.P.** 141.1-143.8 °C.

**<sup>1</sup>H NMR** (300MHz, CDCl<sub>3</sub>) δ 7.73-7.69 (m, 2H), 7.30-7.23 (m, 6H), 7.17-7.09 (m, 2H), 7.03 (d, *J* = 7.7 Hz, 1H), 6.92-6.87 (m, 2H), 6.06 (dd, *J*<sub>1</sub> = 1.1, *J*<sub>2</sub> = 7.7 Hz, 1H), 5.98 (s, 1H), 5.91 (t, *J* = 7.9 Hz, 1H), 5.40 (d, *J* = 7.7 Hz, 1H), 4.83 (q, *J* = 8.6 Hz, 1H), 4.46 (q, *J* = 7.2 Hz, 1H), 3.80 (s, 3H), 3.52-3.45 (m, 1H), 3.28-3.20 (m, 1H), 3.05-2.97 (m, 1H), 2.60-2.53 (m, 1H) ppm.

**<sup>13</sup>C NMR** (75MHz, CDCl<sub>3</sub>) δ 163.6, 146.7, 143.1, 134.5, 131.9, 130.5, 129.8, 128.8, 128.5, 127.9(2C), 127.6, 126.5, 125.8, 124.1, 121.8, 114.4, 99.4, 88.9, 63.5, 55.8, 49.0, 33.0 ppm.

**HRMS** (CI<sup>+</sup>) calculated for C<sub>27</sub>H<sub>27</sub>N<sub>2</sub>O<sub>4</sub>S [M + H]<sup>+</sup>: 475.1692, found: 475.1693.

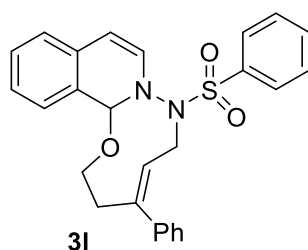

**(E)-4-Phenyl-7-(phenylsulfonyl)-2,3,6,7-tetrahydro-14bH-[1,3,4]oxadiazonino[2,3-a]isoquinoline (31)** was prepared according to the General Procedure C as a light yellow solid (chromatography eluent: petroleum ether/EtOAc = 10:1) in 65% yield (86.1 mg).

**M.P.** 107.1-108.8 °C.

**<sup>1</sup>H NMR** (300MHz, CDCl<sub>3</sub>) δ 7.79 (d, *J* = 7.3 Hz, 2H), 7.57 (t, *J* = 7.4 Hz, 1H), 7.43 (t, *J* = 7.9 Hz, 2H), 7.30-7.21 (m, 6H), 7.16-7.10 (m, 2H), 7.02 (d, *J* = 7.7 Hz, 1H), 6.04 (dd, *J*<sub>1</sub> = 0.9, *J*<sub>2</sub> = 7.7 Hz, 1H), 5.97 (s, 1H), 5.91 (t, *J* = 8.0 Hz, 1H), 5.37 (d, *J* = 7.7 Hz, 1H), 4.86 (q, *J* = 8.9 Hz, 1H), 4.53 (q, *J* = 7.2 Hz, 1H), 3.50-3.43 (m, 1H), 3.25-3.18 (m, 1H), 3.01-2.94 (m, 1H), 2.57-2.50 (m, 1H) ppm.

**<sup>13</sup>C NMR** (75MHz, CDCl<sub>3</sub>) δ 146.9, 143.1, 138.5, 134.8, 133.4, 131.8, 129.2, 128.8, 128.4, 128.2, 127.9, 127.6, 127.5, 126.4, 125.8, 124.1, 121.7, 99.4, 88.7, 63.4, 49.3, 33.0 ppm.

HRMS (CI+) calculated for C<sub>26</sub>H<sub>25</sub>N<sub>2</sub>O<sub>3</sub>S [M + H]<sup>+</sup>: 445.1586, found: 445.1588.

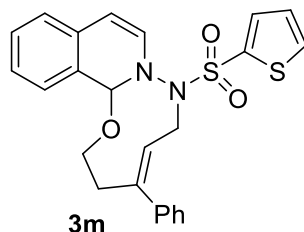

**(E)-4-Phenyl-7-(thiophen-2-ylsulfonyl)-2,3,6,7-tetrahydro-14bH-[1,3,4]oxadiazonino[2,3-a]isoquinoline (3m)** was prepared according to the General Procedure C as a light yellow solid (chromatography eluent: petroleum ether/EtOAc = 10:1) in 91% yield (122.6 mg).

**M.P.** 113.8-114.6 °C.

<sup>1</sup>H NMR (300MHz, CDCl<sub>3</sub>) δ 7.64 (dd, J<sub>1</sub> = 1.3, J<sub>2</sub> = 5.0 Hz, 1H), 7.56 (dd, J<sub>1</sub> = 1.3, J<sub>2</sub> = 3.8 Hz, 1H), 7.31-7.24 (m, 6H), 7.16 (d, J = 3.9 Hz, 2H), 7.09-7.03 (m, 2H), 6.10 (t, J = 1.3 Hz, 2H), 5.93 (t, J = 7.9 Hz, 1H), 5.42 (d, J = 7.5 Hz, 1H), 4.87 (q, J = 8.8 Hz, 1H), 4.52 (q, J = 7.2 Hz, 1H), 3.55-3.48 (m, 1H), 3.30-3.22 (m, 1H), 3.06-2.97 (m, 1H), 2.61-2.53 (m, 1H) ppm.

<sup>13</sup>C NMR (75MHz, CDCl<sub>3</sub>) δ 147.1, 143.1, 138.9, 134.3, 134.2, 133.6, 131.8, 128.9, 128.5(2C), 128.0, 127.9, 127.7, 126.5, 125.9, 124.2, 121.5, 99.7, 88.8, 63.6, 49.6, 33.0 ppm.

HRMS (CI+) calculated for C<sub>24</sub>H<sub>23</sub>N<sub>2</sub>O<sub>3</sub>S<sub>2</sub> [M + H]<sup>+</sup>: 451.1150, found: 451.1147.

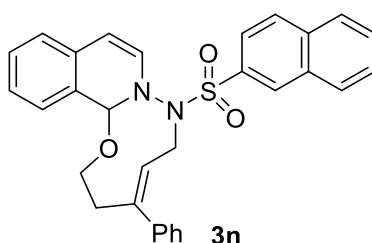

**(E)-7-(Naphthalen-2-ylsulfonyl)-4-phenyl-2,3,6,7-tetrahydro-14bH-[1,3,4]oxadiazonino[2,3-a]isoquinoline (3n)** was prepared according to the General Procedure C as a light yellow solid (chromatography eluent: petroleum

ether/EtOAc = 10:1) in 53% yield (78.7 mg).

**M.P.** 146.8-148.0 °C.

<sup>1</sup>H NMR (300MHz, CDCl<sub>3</sub>) δ 8.35 (s, 1H), 7.92 (d, *J* = 8.6 Hz, 2H), 7.84-7.76 (m, 2H), 7.65-7.60 (m, 3H), 7.31-7.00 (m, 8H), 6.05 (d, *J* = 7.7 Hz, 1H), 5.99 (s, 1H), 5.94 (t, *J* = 8.0 Hz, 1H), 5.35 (d, *J* = 9.5 Hz, 1H), 4.92 (q, *J* = 8.8 Hz, 1H), 4.58 (q, *J* = 7.4 Hz, 1H), 3.49-3.43 (m, 1H), 3.24 (t, *J* = 9.0 Hz, 1H), 3.98 (q, *J* = 13.6 Hz, 1H), 2.57 (dd, *J*<sub>1</sub> = 4.5, *J*<sub>2</sub> = 14.6 Hz, 1H) ppm.

<sup>13</sup>C NMR (75MHz, CDCl<sub>3</sub>) δ 146.9, 143.1, 135.4, 135.2, 134.8, 133.2, 132.3, 132.1, 131.9, 131.8, 130.0, 129.5, 129.2, 128.7, 128.5, 128.4, 128.0, 127.7, 126.5, 125.8, 124.2, 123.1, 121.8, 99.6, 89.0, 63.5, 49.5, 33.1 ppm.

**HRMS** (CI<sup>+</sup>) calculated for C<sub>30</sub>H<sub>27</sub>N<sub>2</sub>O<sub>3</sub>S [M + H]<sup>+</sup>: 495.1742, found: 495.1750.

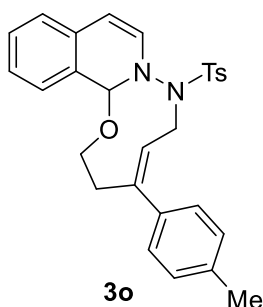

**(E)-4-(*p*-tolyl)-7-tosyl-2,3,6,7-tetrahydro-14*b*H-[1,3,4]oxadiazonino[2,3-*a*]isoquinoline (3o)** was prepared according to the General Procedure C as a light yellow solid (chromatography eluent: petroleum ether/EtOAc = 10:1) in 90% yield (127.4 mg).

**M.P.** 134.2-135.0 °C.

<sup>1</sup>H NMR (300MHz, CDCl<sub>3</sub>) δ 7.68 (d, *J* = 8.3 Hz, 2H), 7.28-7.09 (m, 9H), 7.02 (d, *J* = 7.7 Hz, 1H), 6.05 (dd, *J*<sub>1</sub> = 1.1, *J*<sub>2</sub> = 7.7 Hz, 1H), 6.00 (s, 1H), 5.89 (t, *J* = 7.9 Hz, 1H), 5.36 (d, *J* = 7.7 Hz, 1H), 4.83 (q, *J* = 8.9 Hz, 1H), 4.51 (q, *J* = 7.2 Hz, 1H), 3.50-3.43 (m, 1H), 3.21 (td, *J*<sub>1</sub> = 2.0, *J*<sub>2</sub> = 8.7 Hz, 1H), 3.01-2.93 (m, 1H), 2.57-2.49 (m, 1H), 2.42 (s, 3H), 2.32 (s, 3H) ppm.

<sup>13</sup>C NMR (75MHz, CDCl<sub>3</sub>) δ 146.7, 144.4, 140.3, 137.4, 135.8, 135.1, 132.0, 129.9, 129.2, 128.8, 128.3, 127.9, 127.6, 126.4, 125.7, 124.1, 121.1, 99.2, 88.7, 63.5, 49.4,

33.0, 21.7, 21.2 ppm.

HRMS (CI+) calculated for C<sub>28</sub>H<sub>29</sub>N<sub>2</sub>O<sub>3</sub>S [M + H]<sup>+</sup>: 473.1899, found: 473.1900.

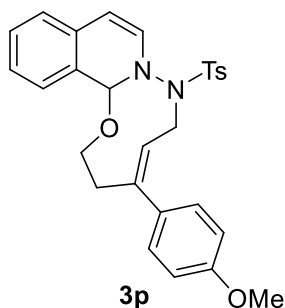

**(E)-4-(4-Methoxyphenyl)-7-tosyl-2,3,6,7-tetrahydro-14bH-[1,3,4]oxadiazonin o[2,3-a]isoquinoline (3p)** was prepared according to the General Procedure C as a light yellow solid (chromatography eluent: petroleum ether/EtOAc = 10:1) in 91% yield (133.2 mg).

**M.P.** 133.4-135.7 °C.

<sup>1</sup>H NMR (300MHz, CDCl<sub>3</sub>) δ 7.68 (d, *J* = 8.3 Hz, 2H), 7.29-7.02 (m, 8H), 6.83 (dt, *J*<sub>1</sub> = 3.0, *J*<sub>2</sub> = 8.8 Hz 2H), 6.05 (dd, *J*<sub>1</sub> = 1.2, *J*<sub>2</sub> = 7.7 Hz 1H), 5.97 (s, 1H), 5.86 (t, *J* = 7.9 Hz, 1H), 5.37 (d, *J* = 7.7 Hz, 1H), 4.82 (q, *J* = 8.8 Hz, 1H), 4.47 (q, *J* = 7.2 Hz, 1H), 3.79 (s, 3H), 3.50-3.43 (m, 1H), 3.24-3.17 (m, 1H), 3.00-2.93 (m, 1H), 2.57-2.49 (m, 1H), 2.42 (s, 3H) ppm.

<sup>13</sup>C NMR (75MHz, CDCl<sub>3</sub>) δ 159.3, 146.2, 144.4, 135.7, 135.4, 134.8, 131.9, 129.9, 128.8, 128.3, 127.9, 127.7, 127.6, 125.8, 124.1, 120.4, 113.9, 99.3, 88.8, 63.5, 55.4, 49.2, 32.9, 21.8 ppm.

HRMS (CI+) calculated for C<sub>28</sub>H<sub>29</sub>N<sub>2</sub>O<sub>4</sub>S [M + H]<sup>+</sup>: 489.1848, found: 489.1852.

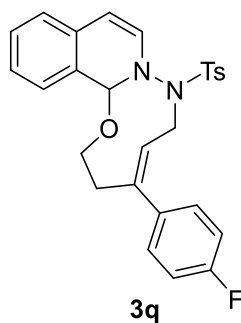

(*E*)-4-(4-Fluorophenyl)-7-tosyl-2,3,6,7-tetrahydro-14*b*H-[1,3,4]oxadiazonino[2,3-*a*]isoquinoline (**3q**) was prepared according to the General Procedure C as a light yellow solid (chromatography eluent: petroleum ether/EtOAc = 10:1) in 80% yield (114.1 mg).

**M.P.** 142.9-144.1 °C.

<sup>1</sup>H NMR (300MHz, CDCl<sub>3</sub>) δ 7.67 (d, *J* = 8.3 Hz, 2H), 7.29-7.09 (m, 7H), 7.05-6.94 (m, 3H), 6.02 (dd, *J*<sub>1</sub> = 1.2, *J*<sub>2</sub> = 7.7 Hz, 1H), 5.98 (s, 1H), 5.86 (t, *J* = 7.8 Hz, 1H), 5.39 (d, *J* = 7.7 Hz, 1H), 4.81 (q, *J* = 8.5 Hz, 1H), 4.43 (q, *J* = 7.2 Hz, 1H), 3.52-3.45 (m, 1H), 3.26-3.18 (m, 1H), 3.05-2.96 (m, 1H), 2.56-2.50 (m, 1H), 2.42 (s, 3H) ppm.

<sup>13</sup>C NMR (75MHz, CDCl<sub>3</sub>) δ 162.4 (d, *J* = 245.3 Hz), 145.7, 144.5, 139.0 (d, *J* = 3.0 Hz), 135.4, 134.2, 131.8, 129.9, 128.8, 128.4, 128.2 (d, *J* = 8.3 Hz), 127.9, 127.6, 125.9, 124.2, 121.8, 115.3 (d, *J* = 21.0 Hz), 99.5, 89.0, 63.4, 48.9, 33.1, 21.7 ppm.

<sup>19</sup>F NMR (282MHz, CDCl<sub>3</sub>) δ -114.9 ppm.

**HRMS** (CI<sup>+</sup>) calculated for C<sub>27</sub>H<sub>26</sub>FN<sub>2</sub>O<sub>3</sub>S [M + H]<sup>+</sup>: 477.1648, found: 477.1647.

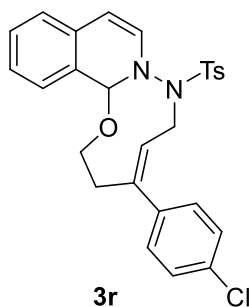

(*E*)-4-(4-Chlorophenyl)-7-tosyl-2,3,6,7-tetrahydro-14*b*H-[1,3,4]oxadiazonino[2,3-*a*]isoquinoline (**3r**) was prepared according to the General Procedure C as a light yellow solid (chromatography eluent: petroleum ether/EtOAc = 10:1) in 86% yield (126.9 mg).

**M.P.** 139.2-141.3 °C.

<sup>1</sup>H NMR (300MHz, CDCl<sub>3</sub>) δ 7.67 (d, *J* = 8.3 Hz, 2H), 7.30-7.09 (m, 9H), 7.04 (d, *J* = 7.7 Hz, 1H), 6.01 (dd, *J*<sub>1</sub> = 1.2, *J*<sub>2</sub> = 7.7 Hz 1H), 5.98 (s, 1H), 5.89 (t, *J* = 7.8 Hz,

1H), 5.40 (d,  $J = 7.7$  Hz, 1H), 4.82 (q,  $J = 8.6$  Hz, 1H), 4.43 (q,  $J = 7.2$  Hz, 1H), 3.51-3.44 (m, 1H), 3.25-3.17 (m, 1H), 3.04-2.96 (m, 1H), 2.55-2.47 (m, 1H), 2.42 (s, 3H) ppm.

$^{13}\text{C}$  NMR (75MHz,  $\text{CDCl}_3$ )  $\delta$  145.6, 144.6, 141.4, 135.3, 134.2, 133.5, 131.8, 129.9, 128.9, 128.6, 128.3, 127.9, 127.8, 127.6, 125.9, 124.2, 122.3, 99.6, 89.0, 63.4, 48.9, 32.9, 21.7 ppm.

HRMS (CI+) calculated for  $\text{C}_{27}\text{H}_{26}\text{ClN}_2\text{O}_3\text{S}$   $[\text{M} + \text{H}]^+$ : 493.1353, found: 493.1360.

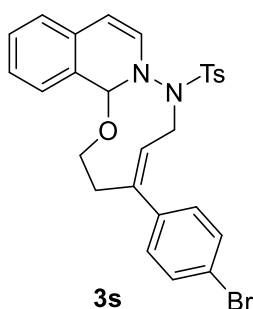

(*E*)-4-(4-Bromophenyl)-7-tosyl-2,3,6,7-tetrahydro-14*b*H-[1,3,4]oxadiazonino[2,3-*a*]isoquinoline (**3s**) was prepared according to the General Procedure C as a light yellow solid (chromatography eluent: petroleum ether/EtOAc = 10:1) in 86% yield (138.2 mg).

M.P. 134.7-136.0 °C.

$^1\text{H}$  NMR (300MHz,  $\text{CDCl}_3$ )  $\delta$  7.67 (d,  $J = 8.3$  Hz, 2H), 7.41 (dd,  $J_1 = 1.7$ ,  $J_2 = 5.0$  Hz, 2H), 7.30-7.09 (m, 7H), 7.04 (d,  $J = 7.7$  Hz, 1H), 6.01 (d,  $J = 8.8$  Hz, 1H), 5.98 (s, 1H), 5.89 (t,  $J = 7.8$  Hz, 1H), 5.38 (d,  $J = 5.9$  Hz, 1H), 4.81 (q,  $J = 8.6$  Hz, 1H), 4.43 (q,  $J = 8.6$  Hz, 1H), 3.51-3.44 (m, 1H), 3.25-3.17 (m, 1H), 3.04-2.96 (m, 1H), 2.54-2.47 (m, 1H), 2.42 (s, 3H) ppm.

$^{13}\text{C}$  NMR (75MHz,  $\text{CDCl}_3$ )  $\delta$  145.6, 144.5, 141.9, 135.3, 134.2, 131.8, 131.6, 129.9, 128.9, 128.3, 128.2, 127.9, 127.6, 125.9, 124.2, 122.4, 121.7, 99.6, 89.0, 63.4, 48.9, 32.9, 21.7 ppm.

HRMS (CI+) calculated for  $\text{C}_{27}\text{H}_{26}\text{BrN}_2\text{O}_3\text{S}$   $[\text{M} + \text{H}]^+$ : 537.0848, found: 537.0844.

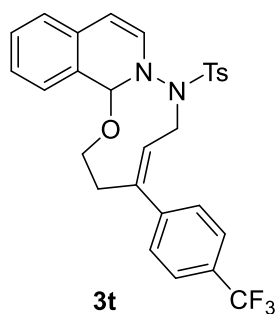

**(E)-7-Tosyl-4-(4-(trifluoromethyl)phenyl)-2,3,6,7-tetrahydro-14bH-[1,3,4]oxadiazonino[2,3-a]isoquinoline (3t)** was prepared according to the General Procedure C as a light yellow solid (chromatography eluent: petroleum ether/EtOAc = 10:1) in 92% yield (144.9 mg).

**M.P.** 144.8-147.7 °C.

<sup>1</sup>H NMR (300MHz, CDCl<sub>3</sub>) δ 7.68 (d, *J* = 8.3 Hz, 2H), 7.55(d, *J* = 8.2 Hz, 2H), 7.37 (d, *J* = 8.1 Hz, 2H), 7.30-7.10 (m, 5H), 7.05 (d, *J* = 7.7 Hz, 1H), 6.00 (d, *J* = 4.7 Hz, 2H), 5.95 (t, *J* = 8.0 Hz, 1H), 5.40 (d, *J* = 7.9 Hz, 1H), 4.84 (q, *J* = 8.5 Hz, 1H), 4.44 (q, *J* = 7.1 Hz, 1H), 3.54-3.47 (m, 1H), 3.27-3.20 (m, 1H), 3.10-3.03 (m, 1H), 2.58-2.53 (m, 1H), 2.42 (s, 3H) ppm.

<sup>13</sup>C NMR (75MHz, CDCl<sub>3</sub>) δ 146.2, 145.6, 144.6, 135.2, 134.0, 131.8, 130.0, 129.6 (q, *J* = 32.3 Hz), 128.9, 128.4, 127.9, 127.6, 126.8, 126.1, 126.0, 125.5 (q, *J* = 3.8 Hz), 124.2, 123.6, 99.7, 89.1, 63.4, 48.8, 32.9, 21.8 ppm.

<sup>19</sup>F NMR (282MHz, CDCl<sub>3</sub>) δ -62.5 ppm.

**HRMS** (CI<sup>+</sup>) calculated for C<sub>28</sub>H<sub>26</sub>F<sub>3</sub>N<sub>2</sub>O<sub>3</sub>S [M + H]<sup>+</sup>: 527.1616, found: 527.1620.

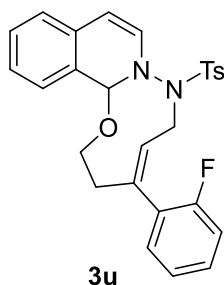

**(E)-4-(2-Fluorophenyl)-7-tosyl-2,3,6,7-tetrahydro-14bH-[1,3,4]oxadiazonino[2,3-a]isoquinoline (3u)** was prepared according to the General Procedure C as a light yellow solid (chromatography eluent: petroleum ether/EtOAc = 10:1) in



85% yield (121.4 mg).

**M.P.** 145.3-146.1 °C.

<sup>1</sup>H NMR (300MHz, CDCl<sub>3</sub>) δ 7.68 (d, *J* = 8.3 Hz, 2H), 7.23-6.96 (m, 10H), 6.10 (d, *J* = 6.7 Hz, 1H), 5.99 (s, 1H), 5.84 (t, *J* = 8.0 Hz, 1H), 5.43 (d, *J* = 7.7 Hz, 1H), 4.85 (q, *J* = 8.9 Hz, 1H), 4.52 (q, *J* = 7.2 Hz, 1H), 3.48-3.41 (m, 1H), 3.28 (t, *J* = 9.3 Hz, 1H), 2.96 (q, *J* = 9.7 Hz, 1H), 2.46 (s, 1H), 2.42 (s, 3H) ppm.

<sup>13</sup>C NMR (75MHz, CDCl<sub>3</sub>) δ 159.7 (d, *J* = 245.3 Hz), 144.5, 143.4, 135.7, 135.2, 131.9, 131.7 (d, *J* = 14.3 Hz), 130.4 (d, *J* = 3.8 Hz), 129.9, 129.2 (d, *J* = 8.3 Hz), 128.8, 128.3, 127.9, 127.6, 125.8, 124.9, 124.3, 124.2, 115.8 (d, *J* = 22.5 Hz), 99.4, 88.7, 63.4, 49.2, 33.7, 21.8 ppm.

<sup>19</sup>F NMR (282MHz, CDCl<sub>3</sub>) δ -114.4 ppm.

**HRMS** (CI<sup>+</sup>) calculated for C<sub>27</sub>H<sub>26</sub>FN<sub>2</sub>O<sub>3</sub>S [M + H]<sup>+</sup>: 477.1648, found: 477.1647.

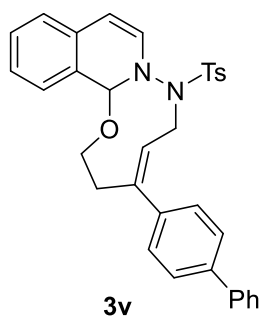

**(E)-4-([1,1'-Biphenyl]-4-yl)-7-tosyl-2,3,6,7-tetrahydro-14bH-[1,3,4]oxadiazono[2,3-a]isoquinoline (3v)** was prepared according to the General Procedure C as a light yellow solid (chromatography eluent: petroleum ether/EtOAc = 10:1) in 92% yield (147.4 mg).

**M.P.** 139.4-142.5 °C.

<sup>1</sup>H NMR (300MHz, CDCl<sub>3</sub>) δ 7.69 (d, *J* = 8.3 Hz, 2H), 7.58-7.23 (m, 12H), 7.18-7.09 (m, 2H), 7.04 (d, *J* = 7.6 Hz, 1H), 6.06 (dd, *J*<sub>1</sub> = 1.2, *J*<sub>2</sub> = 7.7 Hz, 1H), 5.98 (t, *J* = 5.5 Hz, 2H), 5.40 (d, *J* = 7.7 Hz, 1H), 4.86 (q, *J* = 8.8 Hz, 1H), 4.51 (q, *J* = 7.2 Hz, 1H), 3.55-3.48 (m, 1H), 3.30-3.22 (m, 1H), 3.07-2.99 (m, 1H), 2.63-2.56 (m, 1H), 2.42 (s, 3H) ppm.

$^{13}\text{C}$  NMR (75MHz,  $\text{CDCl}_3$ )  $\delta$  146.3, 144.5, 141.9, 140.7, 140.5, 135.6, 134.7, 131.9, 129.9, 128.9, 128.8, 128.3, 127.9, 127.6, 127.5, 127.2, 127.1, 126.9, 125.8, 124.2, 121.8, 99.4, 88.9, 63.5, 49.2, 32.9, 21.7 ppm.

HRMS (CI+) calculated for  $\text{C}_{33}\text{H}_{31}\text{N}_2\text{O}_3\text{S}$   $[\text{M} + \text{H}]^+$ : 535.2055, found: 535.2068.

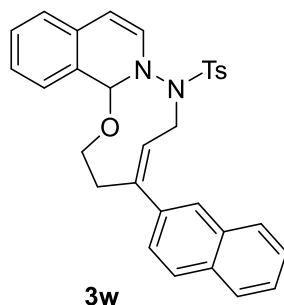

(*E*)-4-(Naphthalen-2-yl)-7-tosyl-2,3,6,7-tetrahydro-14*b*H-[1,3,4]oxadiazoninolo[2,3-*a*]isoquinoline (**3w**) was prepared according to the General Procedure C as a light yellow solid (chromatography eluent: petroleum ether/EtOAc = 10:1) in 89% yield (135.6 mg).

M.P. 145.7-147.3 °C.

$^1\text{H}$  NMR (300MHz,  $\text{CDCl}_3$ )  $\delta$  7.81-7.69 (m, 6H), 7.47-7.42 (m, 3H), 7.30-7.24 (m, 3H), 7.18-7.09 (m, 2H), 7.04 (d,  $J = 6.6$  Hz, 1H), 6.07(t,  $J = 7.7$  Hz, 2H), 6.02 (s, 1H), 5.39 (d,  $J = 7.7$  Hz, 1H), 4.89 (q,  $J = 8.8$  Hz, 1H), 4.54 (q,  $J = 7.1$  Hz, 1H), 3.58-3.51 (m, 1H), 3.33-3.25 (m, 1H), 3.13-3.06 (m, 1H), 2.72-2.64 (m, 1H), 2.42 (s, 3H) ppm.

$^{13}\text{C}$  NMR (75MHz,  $\text{CDCl}_3$ )  $\delta$  146.6, 144.5, 140.3, 135.6, 134.7, 133.4, 132.8, 131.9, 130.0, 128.8, 128.3, 128.2, 128.1, 128.0, 127.7, 127.6, 126.4, 126.1, 125.8, 125.2, 124.8, 124.2, 122.4, 99.5, 88.9, 63.6, 49.3, 33.0, 21.8 ppm.

HRMS (CI+) calculated for  $\text{C}_{31}\text{H}_{29}\text{N}_2\text{O}_3\text{S}$   $[\text{M} + \text{H}]^+$ : 509.1899, found: 509.1903.

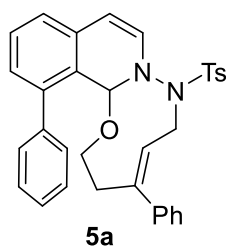

**4,12-Diphenyl-5-tosyl-4-vinyl-2,3,4,5-tetrahydro-12*b*H-[1,3,4]oxadiazepino[2,3-*a*]isoquinoline (5a)** was prepared according to the General Procedure C as a light yellow solid (chromatography eluent: petroleum ether/EtOAc = 10:1) in 90% yield (144.1 mg).

**M.P.** 150.5-152.7 °C.

**<sup>1</sup>H NMR** (300MHz, CDCl<sub>3</sub>) δ 7.63 (d, *J* = 8.3 Hz, 2H), 7.39-7.21 (m, 11H), 7.19-7.16 (m, 2H), 7.10-7.04 (m, 2H), 5.93-5.89 (m, 2H), 5.75 (dd, *J* = 6.2, *J* = 7.5 Hz, 1H), 5.58 (d, *J* = 7.4 Hz, 1H), 4.81 (q, *J* = 6.1 Hz, 1H), 4.15 (q, *J* = 7.7 Hz, 1H), 3.26-3.09 (m, 2H), 2.84-2.79 (m, 1H), 2.44 (s, 3H), 2.39 (d, *J* = 3.6 Hz, 1H) ppm.

**<sup>13</sup>C NMR** (75MHz, CDCl<sub>3</sub>) δ 146.2, 144.5, 142.3, 141.0, 140.5, 134.1, 131.4, 129.8, 129.4, 128.7, 128.4, 128.2, 128.0, 127.7, 127.5, 127.3, 126.6(2C), 126.3, 123.8, 120.3, 101.4, 88.2, 65.1, 48.2, 33.1, 21.8 ppm.

**HRMS** (CI<sup>+</sup>) calculated for C<sub>33</sub>H<sub>31</sub>N<sub>2</sub>O<sub>3</sub>S [M + H]<sup>+</sup>: 535.2055, found: 535.2065.

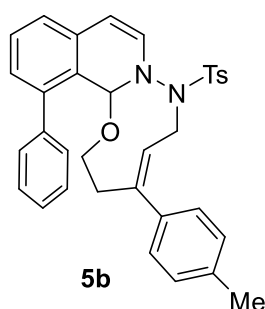

**12-Phenyl-4-(*p*-tolyl)-5-tosyl-4-vinyl-2,3,4,5-tetrahydro-12*b*H-[1,3,4]oxadiazepino[2,3-*a*]isoquinoline (5b)** was prepared according to the General Procedure C as a light yellow solid (chromatography eluent: petroleum ether/EtOAc = 10:1) in 95% yield (156.4 mg).

**M.P.** 128.5-130.6 °C.

$^1\text{H NMR}$  (400MHz,  $\text{CDCl}_3$ )  $\delta$  7.64 (d,  $J = 6.2$  Hz, 2H), 7.40-7.23 (m, 5H), 7.25-7.22 (m, 3H), 7.11-7.04 (m, 6H), 5.94 (dd,  $J_1 = 1.2$ ,  $J_2 = 7.6$  Hz, 1H), 5.88 (d,  $J = 1.3$  Hz, 1H), 5.75 (t,  $J = 7.0$  Hz, 1H), 5.58 (d,  $J = 7.6$  Hz, 1H), 4.81 (q,  $J = 6.3$  Hz, 1H), 4.18 (q,  $J = 7.7$  Hz, 1H), 3.23 (dt,  $J_1 = 10.8$ ,  $J_2 = 2.6$  Hz, 1H), 3.12 (td,  $J_1 = 13.9$ ,  $J_2 = 3.2$  Hz, 1H), 2.84 (dt,  $J_1 = 3.8$ ,  $J_2 = 11.8$  Hz, 1H), 2.45 (s, 3H), 2.41 (d,  $J = 14.6$  Hz, 1H), 2.31 (s, 3H) ppm.

$^{13}\text{C NMR}$  (101MHz,  $\text{CDCl}_3$ )  $\delta$  146.1, 144.4, 141.0, 140.5, 139.5, 137.3, 134.3, 131.7, 131.5, 129.8, 129.4, 129.1, 128.7, 128.2, 128.0, 127.7, 127.3, 126.4, 126.2, 123.8, 119.6, 101.2, 88.1, 65.1, 48.4, 33.0, 21.8, 21.2 ppm.

**HRMS** (CI $^+$ ) calculated for  $\text{C}_{34}\text{H}_{33}\text{N}_2\text{O}_3\text{S}$  [ $\text{M} + \text{H}$ ] $^+$ : 549.2212, found: 549.2221.

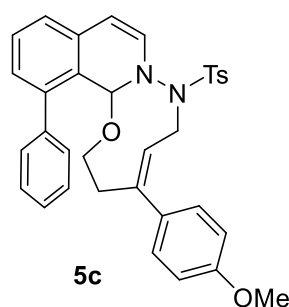

**4-(4-Methoxyphenyl)-12-phenyl-5-tosyl-4-vinyl-2,3,4,5-tetrahydro-12bH-[1,3,4]oxadiazepino[2,3-a]isoquinoline (5c)** was prepared according to the General Procedure C as a light yellow solid (chromatography eluent: petroleum ether/EtOAc = 10:1) in 89% yield (150.7 mg).

**M.P.** 123.8-125.0 °C.

$^1\text{H NMR}$  (400MHz,  $\text{CDCl}_3$ )  $\delta$  7.63 (d,  $J = 8.2$  Hz, 2H), 7.38-7.23 (m, 8H), 7.14-7.05 (m, 4H), 6.78(d,  $J = 8.7$  Hz, 2H), 5.91 (t,  $J = 7.6$  Hz, 2H), 5.71 (t,  $J = 6.8$  Hz, 1H), 5.58 (d,  $J = 7.6$  Hz, 1H), 4.80 (dd,  $J_1 = 6.1$ ,  $J_2 = 13.9$  Hz, 1H), 4.14 (q,  $J = 7.8$  Hz, 1H), 3.77 (s, 3H), 3.22 (td,  $J_1 = 11.1$ ,  $J_2 = 2.6$  Hz, 1H), 3.11 (td,  $J_1 = 13.8$ ,  $J_2 = 3.0$  Hz, 1H), 2.82 (dt,  $J_1 = 11.7$ ,  $J_2 = 3.6$  Hz, 1H), 2.45 (s, 3H), 2.40 (t,  $J = 3.1$  Hz, 1H) ppm.

$^{13}\text{C NMR}$  (101MHz,  $\text{CDCl}_3$ )  $\delta$  159.2, 145.6, 144.4, 141.0, 140.5, 134.7, 134.1, 131.5, 131.4, 129.8, 129.4, 128.7, 128.2, 128.0, 127.7(2C), 127.3, 126.3, 123.8, 118.7, 113.8,

101.3, 88.2, 65.1, 55.4, 48.3, 33.0, 21.8 ppm.

HRMS (CI<sup>+</sup>) calculated for C<sub>34</sub>H<sub>33</sub>N<sub>2</sub>O<sub>4</sub>S [M + H]<sup>+</sup>: 565.2161, found: 565.2169.

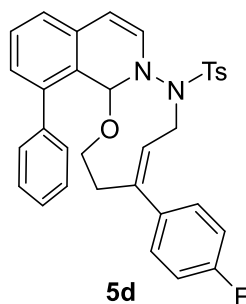

**4-(4-Fluorophenyl)-12-phenyl-5-tosyl-4-vinyl-2,3,4,5-tetrahydro-12*b*H-[1,3,4]oxadiazepino[2,3-*a*]isoquinoline (5d)** was prepared according to the General Procedure C as a light yellow solid (chromatography eluent: petroleum ether/EtOAc = 10:1) in 85% yield (140.8 mg).

**M.P.** 131.2-134.9 °C.

**<sup>1</sup>H NMR** (400MHz, CDCl<sub>3</sub>) δ 7.69-7.61 (m, 4H), 7.56-7.53 (m, 1H), 7.48-7.44 (m, 2H), 7.38-7.28 (m, 3H), 7.15-7.05 (m, 4H), 6.92(t, *J* = 8.6 Hz, 2H), 5.88 (t, *J* = 8.8 Hz, 2H), 5.70 (t, *J* = 7.2 Hz, 1H), 5.59 (d, *J* = 7.6 Hz, 1H), 4.79 (dd, *J*<sub>1</sub> = 5.7, *J*<sub>2</sub> = 14.1 Hz, 1H), 4.09 (q, *J* = 7.8 Hz, 1H), 3.23-3.11(m, 2H), 2.80-2.76 (m, 1H), 2.45 (s, 3H), 2.35 (t, *J* = 11.0 Hz, 1H) ppm.

**<sup>13</sup>C NMR** (101MHz, CDCl<sub>3</sub>) δ 162.2 (d, *J* = 247.5 Hz), 145.1, 144.6, 140.9, 140.5, 138.2 (d, *J* = 3.0 Hz), 132.2 (d, *J* = 10.1 Hz), 131.9 (d, *J* = 2.0 Hz), 130.9 (d, *J* = 41.4 Hz), 129.8, 129.4, 128.8, 128.6 (d, *J* = 12.1 Hz), 128.1 (d, *J* = 8.0 Hz), 128.2, 128.0, 127.4 (d, *J* = 43.4 Hz), 126.3, 123.9, 120.3, 115.2 (d, *J* = 21.2 Hz), 101.6, 88.4, 64.9, 48.0, 33.2, 21.8 ppm.

**<sup>19</sup>F NMR** (282MHz, CDCl<sub>3</sub>) δ -115.1 ppm.

HRMS (CI<sup>+</sup>) calculated for C<sub>33</sub>H<sub>30</sub>FN<sub>2</sub>O<sub>3</sub>S [M + H]<sup>+</sup>: 553.1961, found: 553.1968.

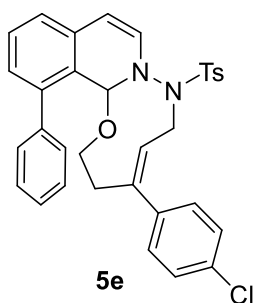

**4-(4-Chlorophenyl)-12-phenyl-5-tosyl-4-vinyl-2,3,4,5-tetrahydro-12*b*H-[1,3,4]oxadiazepino[2,3-*a*]isoquinoline (5e)** was prepared according to the General Procedure C as a light yellow solid (chromatography eluent: petroleum ether/EtOAc = 10:1) in 97% yield (165.8 mg).

**M.P.** 150.3-152.4 °C.

**<sup>1</sup>H NMR** (400MHz, CDCl<sub>3</sub>) δ 7.57-7.45 (m, 4H), 7.39-7.29 (m, 4H), 7.23(t, *J* = 6.3 Hz, 4H), 7.14-7.06 (m, 4H), 5.88 (t, *J* = 7.8 Hz, 2H), 5.74 (dd, *J*<sub>1</sub> = 6.0, *J*<sub>2</sub> = 10.3 Hz, 1H), 5.59 (d, *J* = 7.6 Hz, 1H), 4.80 (dd, *J*<sub>1</sub> = 5.7, *J*<sub>2</sub> = 14.1 Hz, 1H), 4.12 (q, *J* = 7.4 Hz, 1H), 3.23-3.11(m, 2H), 2.80-2.76 (m, 1H), 2.45 (s, 3H), 2.36 (t, *J* = 11.2 Hz, 1H) ppm.

**<sup>13</sup>C NMR** (101MHz, CDCl<sub>3</sub>) δ 144.9, 144.6, 140.9, 140.7, 140.4, 133.9, 133.4, 132.3, 131.2, 129.8, 129.2, 128.8, 128.5, 128.2, 128.1, 127.9, 127.7, 127.3, 126.3, 123.9, 120.8, 101.6, 88.4, 64.9, 48.0, 33.0, 21.8 ppm.

**HRMS** (CI<sup>+</sup>) calculated for C<sub>33</sub>H<sub>30</sub>ClN<sub>2</sub>O<sub>3</sub>S [M + H]<sup>+</sup>: 569.1666, found: 569.1672.

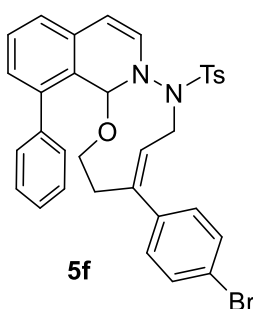

**4-(4-Bromophenyl)-12-phenyl-5-tosyl-4-vinyl-2,3,4,5-tetrahydro-12*b*H-[1,3,4]oxadiazepino[2,3-*a*]isoquinoline (5f)** was prepared according to the General Procedure C as a light yellow solid (chromatography eluent: petroleum ether/EtOAc = 10:1) in 93% yield (171.2 mg).

**M.P.** 151.3-153.5 °C.

**<sup>1</sup>H NMR** (400MHz, CDCl<sub>3</sub>) δ 7.63 (d, *J* = 7.5 Hz, 2H), 7.38-7.24 (m, 10H), 7.11-7.04 (m, 4H), 5.88(t, *J* = 8.5 Hz, 2H), 5.75 (t, *J* = 6.6 Hz, 1H), 6.59 (d, *J* = 7.6 Hz, 1H), 4.80 (dd, *J*<sub>1</sub> = 5.7, *J*<sub>2</sub> = 14.1 Hz, 1H), 4.12 (q, *J* = 7.8 Hz, 1H), 3.22-3.10 (m, 2H), 2.77 (dd, *J*<sub>1</sub> = 6.0, *J*<sub>2</sub> = 11.7 Hz 1H), 2.45 (s, 3H), 2.36 (t, *J* = 11.4 Hz, 1H) ppm.

**<sup>13</sup>C NMR** (101MHz, CDCl<sub>3</sub>) δ 144.9, 144.6, 141.1, 140.9, 140.4, 133.9, 131.5, 131.2, 130.8, 129.8, 129.4, 128.8, 128.3, 128.2, 128.0, 127.7, 127.3, 126.3, 123.9, 121.6, 120.8, 101.6, 88.4, 64.9, 48.0, 32.9, 21.8 ppm.

**HRMS** (CI<sup>+</sup>) calculated for C<sub>33</sub>H<sub>30</sub>BrN<sub>2</sub>O<sub>3</sub>S [M + H]<sup>+</sup>: 613.1161, found: 613.1171.

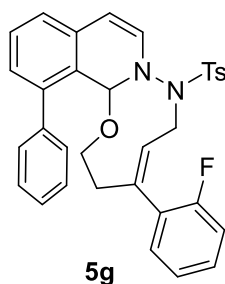

**4-(2-Fluorophenyl)-12-phenyl-5-tosyl-4-vinyl-2,3,4,5-tetrahydro-12*b*H-[1,3,4]oxadiazepino[2,3-*a*]isoquinoline (5g)** was prepared according to the General Procedure C as a light yellow solid (chromatography eluent: petroleum ether/EtOAc = 10:1) in 82% yield (136.6 mg).

**M.P.** 114.5-115.2 °C.

**<sup>1</sup>H NMR** (400MHz, CDCl<sub>3</sub>) δ 7.64 (d, *J* = 8.3 Hz, 2H), 7.40-7.30 (m, 5H), 7.24-7.17 (m, 3H), 7.13-7.02 (m, 6H), 5.98 (dd, *J*<sub>1</sub> = 1.2, *J*<sub>2</sub> = 7.6 Hz, 1H), 5.89 (d, *J* = 1.2 Hz, 1H), 5.72 (t, *J* = 6.9 Hz, 1H), 5.63 (d, *J* = 7.6 Hz, 1H), 4.82 (q, *J* = 6.3 Hz, 1H), 4.18 (q, *J* = 7.7 Hz, 1H), 3.26-3.20(m, 1H), 3.11-3.05(m, 1H), 2.82 (dt, *J*<sub>1</sub> = 3.7, *J*<sub>2</sub> = 12.0 Hz 1H), 2.45 (s, 3H), 2.39 (t, *J* = 7.8 Hz, 1H) ppm.

**<sup>13</sup>C NMR** (101MHz, CDCl<sub>3</sub>) δ 159.6 (d, *J* = 247.5 Hz), 144.4, 142.7, 140.9, 140.4, 134.3, 132.2 (d, *J* = 10.1 Hz), 131.7, 131.3, 130.8, 130.7, 129.8, 129.4, 129.1 (d, *J* = 8.1 Hz), 128.6, 128.2, 128.1, 127.4 (d, *J* = 47.5 Hz), 126.2, 124.2 (d, *J* = 3.0 Hz),

123.8, 123.5, 115.5 (d,  $J = 22.2$  Hz), 101.5, 88.1, 65.0, 48.2, 33.7, 21.8 ppm.

$^{19}\text{F}$  NMR (282MHz,  $\text{CDCl}_3$ )  $\delta$  -114.9 ppm.

**HRMS** (CI+) calculated for  $\text{C}_{33}\text{H}_{30}\text{FN}_2\text{O}_3\text{S}$   $[\text{M} + \text{H}]^+$ : 535.1961, found: 553.1965.



#### IV. Gram-scale Synthesis

##### Gram-scale synthesis:

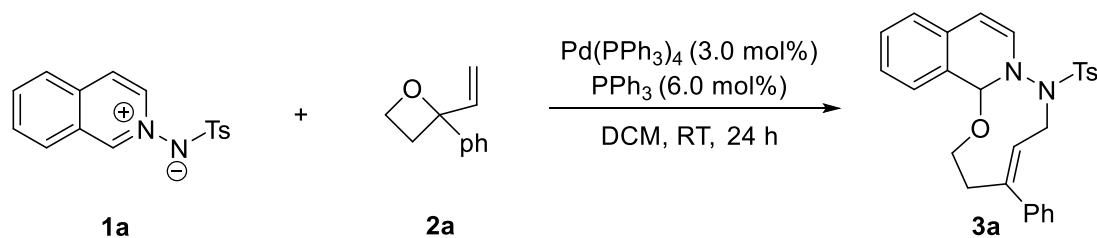

Under N<sub>2</sub> at room temperature, to a solution of *N*-iminoisoquinolinium ylide **1a** (0.89 g, 3.0 mmol) and 2-vinyl oxetane **2a** (0.96 g, 9.0 mmol) in DCM (30 mL) was added Pd(PPh<sub>3</sub>)<sub>4</sub> (104 mg, 0.09 mmol, 3.0 mol%) and PPh<sub>3</sub> (47.2 mg, 0.18 mmol, 6.0 mol%). The reaction mixture was stirred at room temperature for 24 h. The reaction mixture was directly concentrated and purified by silica gel column chromatography (petroleum ether/EtOAc = 10:1) to afford the desired product **3a** in 87% yield (1.20 g).

# NMR Spectrum

3sjwei 4423 xhl-1-81-h-fr 1h cdcl3

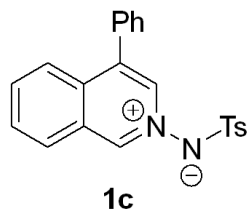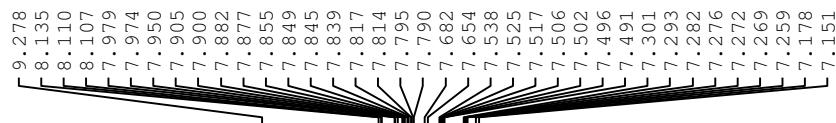

2.350

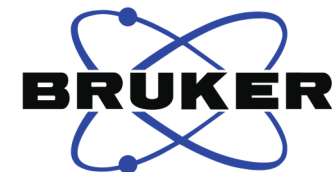

Current Data Parameters  
NAME 2021-4--11Project 1 data  
EXPNO 4423  
PROCNO 1

F2 - Acquisition Parameters  
Date\_ 20210704  
Time 21.22  
INSTRUM spect  
PROBHD 5 mm PABBO BB-  
PULPROG zg30  
TD 65536  
SOLVENT CDCl3  
NS 16  
DS 2  
SWH 6009.615 Hz  
FIDRES 0.091699 Hz  
AQ 5.4525952 sec  
RG 161  
DW 83.200 usec  
DE 6.50 usec  
TE 296.2 K  
D1 1.00000000 sec  
TD0 1

==== CHANNEL f1 =====  
SFO1 300.1318534 MHz  
NUC1 1H  
P1 10.00 usec  
PLW1 14.00000000 W

F2 - Processing parameters  
SI 65536  
SF 300.1300073 MHz  
WDW EM  
SSB 0  
LB 0.30 Hz  
GB 0  
PC 1.00

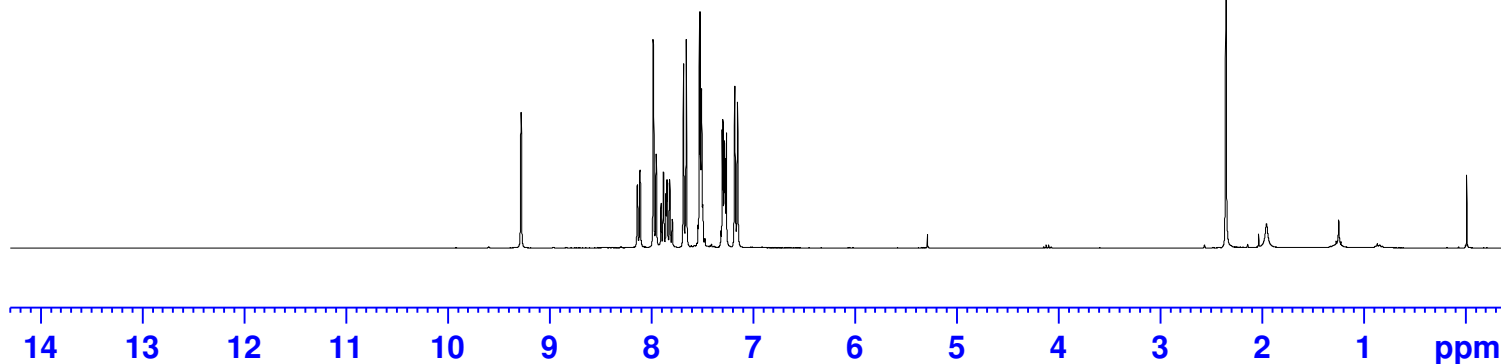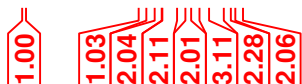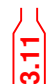

3sjwei 4424 xhl-1-81-c-fr 13c cdcl3

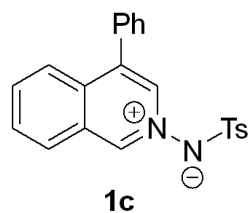

145.87  
141.64  
139.24  
138.48  
136.92  
134.43  
133.68  
133.15  
130.41  
129.76  
129.68  
129.36  
129.22  
129.20  
128.47  
127.41  
125.53

77.57  
77.15  
76.73

21.47

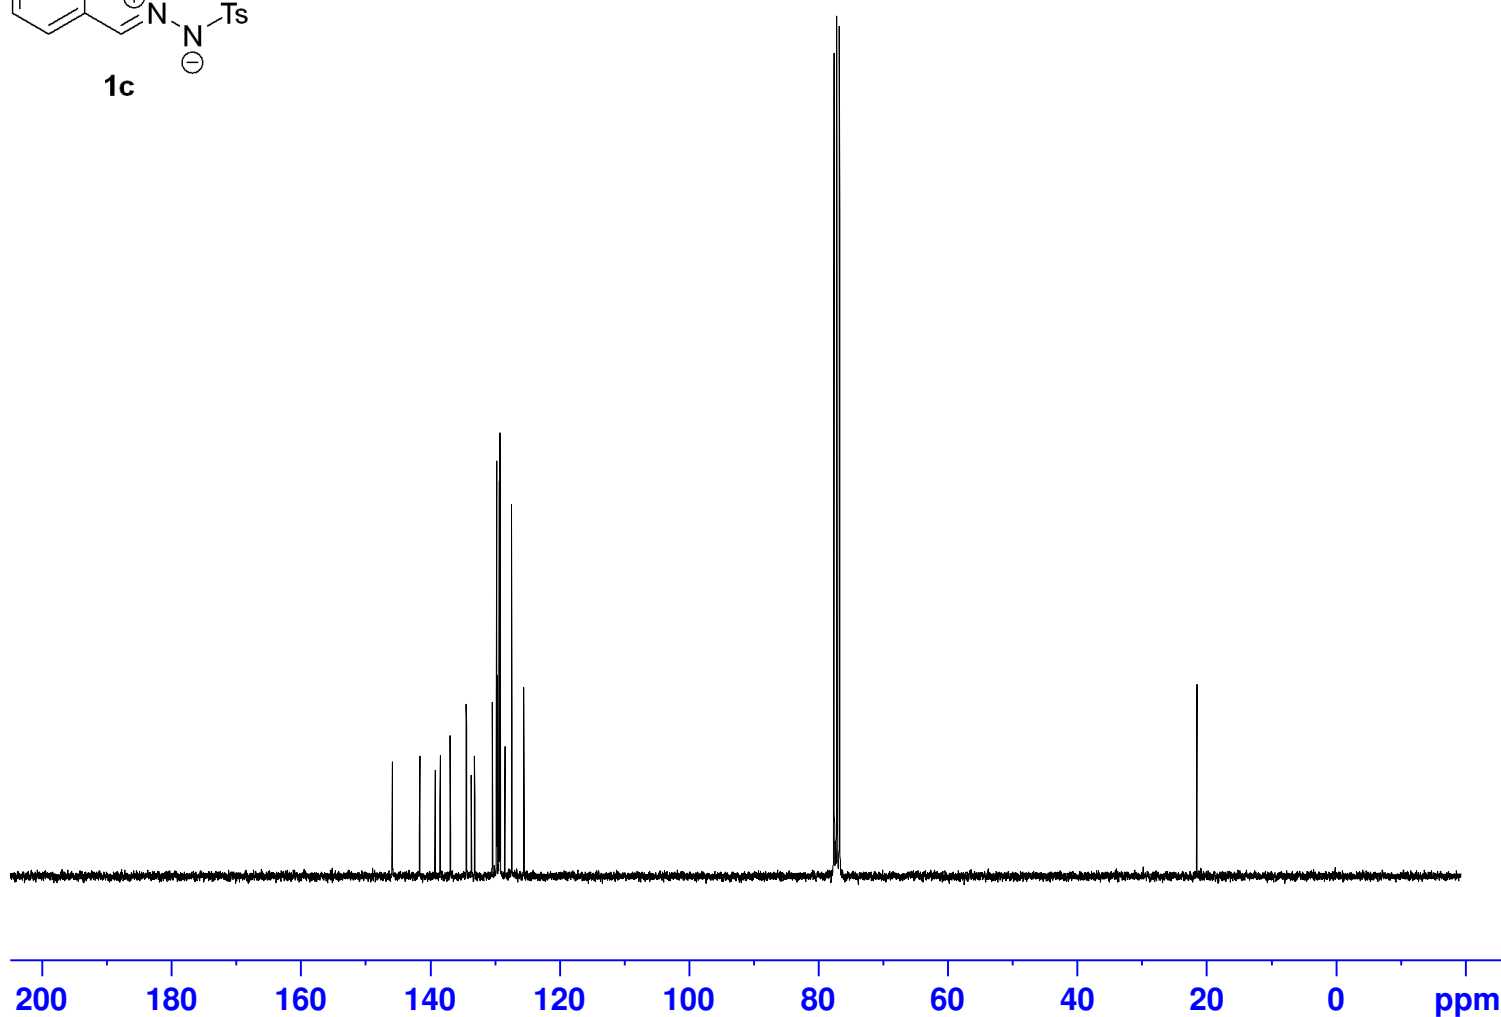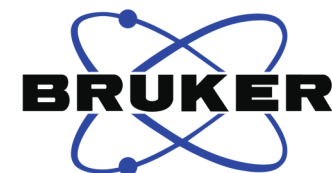

Current Data Parameters  
NAME 2021-4--11Project 1 data  
EXPNO 4424  
PROCNO 1

F2 - Acquisition Parameters  
Date\_ 20210704  
Time 22.30  
INSTRUM spect  
PROBHD 5 mm PABBO BB-  
PULPROG zgpg30  
TD 65536  
SOLVENT CDC13  
NS 1024  
DS 4  
SWH 18028.846 Hz  
FIDRES 0.275098 Hz  
AQ 1.8175317 sec  
RG 203  
DW 27.733 usec  
DE 6.50 usec  
TE 296.1 K  
D1 2.00000000 sec  
D11 0.03000000 sec  
TD0 1

===== CHANNEL f1 =====  
SFO1 75.4752949 MHz  
NUC1 13C  
P1 9.50 usec  
PLW1 34.20000076 W

===== CHANNEL f2 =====  
SFO2 300.1312005 MHz  
NUC2 1H  
CPDPRG[2] waltz16  
PCPD2 90.00 usec  
PLW2 14.00000000 W  
PLW12 0.17284000 W  
PLW13 0.14000000 W

F2 - Processing parameters  
SI 32768  
SF 75.4677432 MHz  
WDW EM  
SSB 0  
LB 1.00 Hz  
GB 0  
PC 1.40

3sjwei 4421 xh1-1-78-h-fr 1h cdcl3

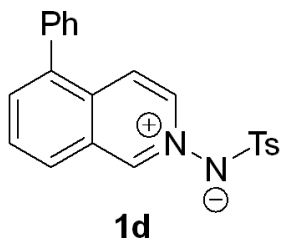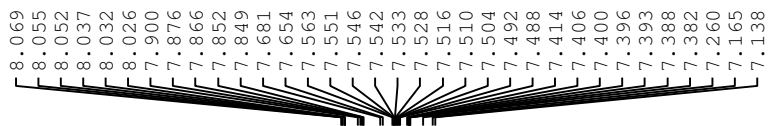

2.337



Current Data Parameters  
NAME 2021-4--11Project 1 data  
EXPNO 4421  
PROCNO 1

F2 - Acquisition Parameters  
Date\_ 20210704  
Time 20.09  
INSTRUM spect  
PROBHD 5 mm PABBO BB-  
PULPROG zg30  
TD 65536  
SOLVENT CDC13  
NS 16  
DS 2  
SWH 6009.615 Hz  
FIDRES 0.091699 Hz  
AQ 5.4525952 sec  
RG 203  
DW 83.200 usec  
DE 6.50 usec  
TE 296.1 K  
D1 1.00000000 sec  
TD0 1

==== CHANNEL f1 =====  
SFO1 300.1318534 MHz  
NUC1 1H  
P1 10.00 usec  
PLW1 14.00000000 W

F2 - Processing parameters  
SI 65536  
SF 300.1300072 MHz  
WDW EM  
SSB 0  
LB 0.30 Hz  
GB 0  
PC 1.00

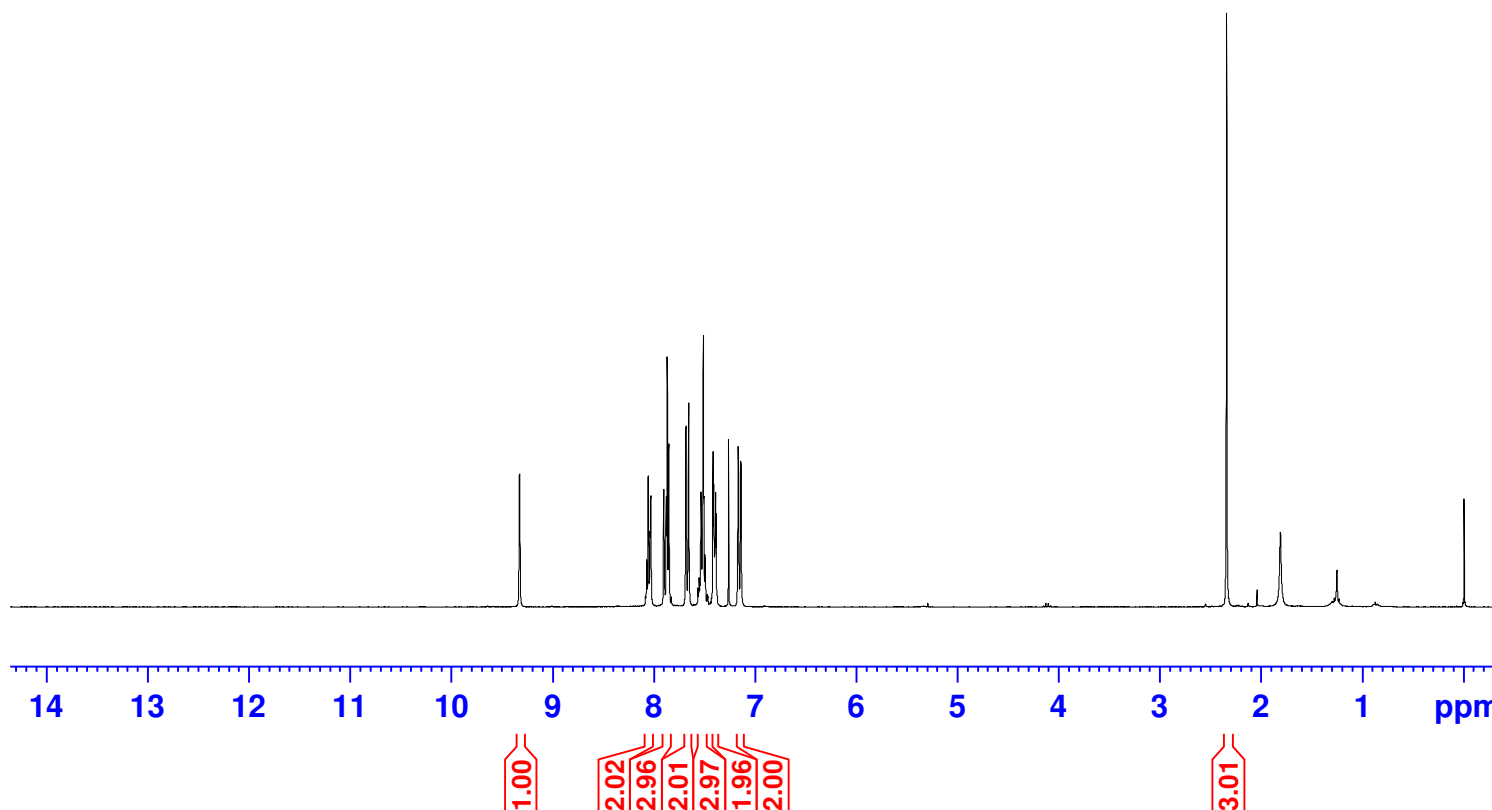

3sjwei 4422 xh1-1-78-c-fr 13c cdcl3

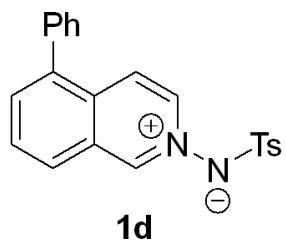

146.88  
141.65  
140.27  
139.31  
137.70  
137.13  
134.63  
133.02  
130.33  
129.76  
129.40  
129.14  
128.89  
128.71  
128.10  
127.30  
123.25

77.57  
77.15  
76.73

— 21.52

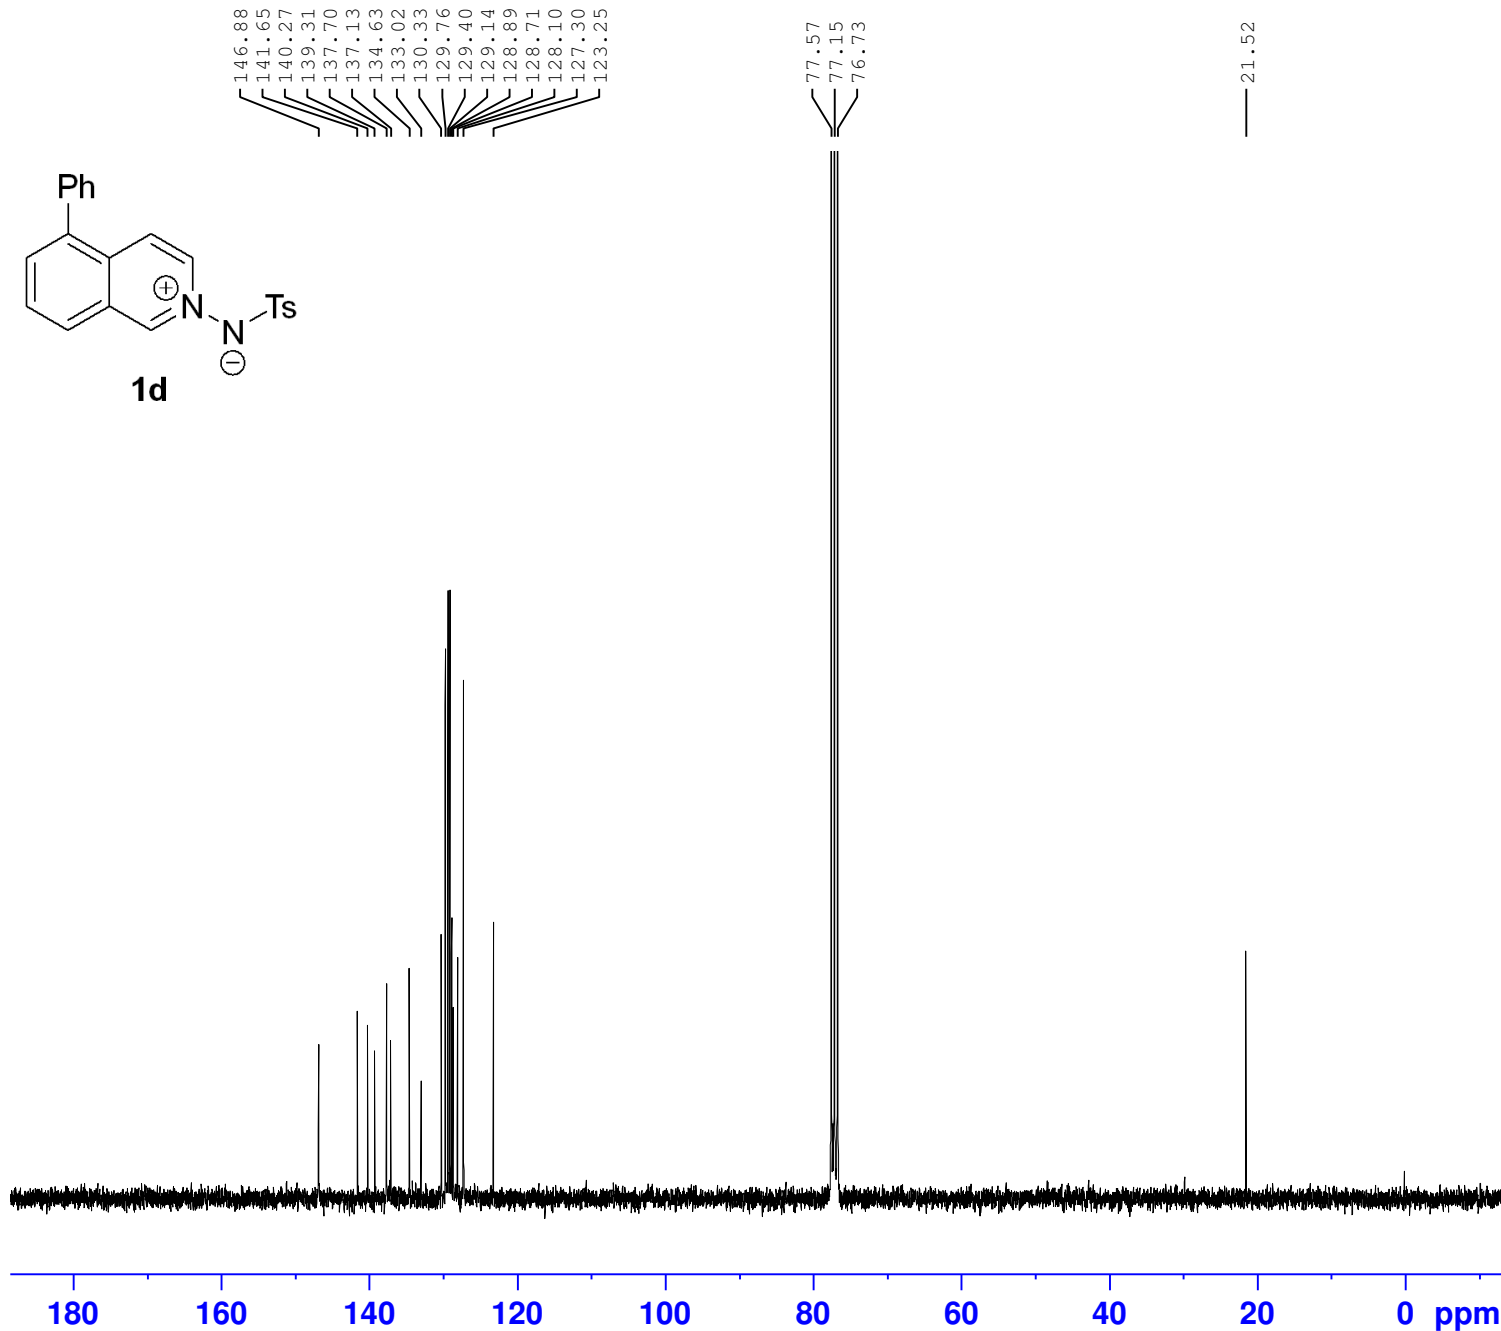

Current Data Parameters  
NAME 2021-4--11Project 1 data  
EXPNO 4422  
PROCNO 1

F2 - Acquisition Parameters  
Date\_ 20210704  
Time 21.17  
INSTRUM spect  
PROBHD 5 mm PABBO BB-  
PULPROG zgpg30  
TD 65536  
SOLVENT CDC13  
NS 1024  
DS 4  
SWH 18028.846 Hz  
FIDRES 0.275098 Hz  
AQ 1.8175317 sec  
RG 203  
DW 27.733 usec  
DE 6.50 usec  
TE 296.1 K  
D1 2.00000000 sec  
D11 0.03000000 sec  
TD0 1

===== CHANNEL f1 =====  
SFO1 75.4752949 MHz  
NUC1 13C  
P1 9.50 usec  
PLW1 34.20000076 W

===== CHANNEL f2 =====  
SFO2 300.1312005 MHz  
NUC2 1H  
CPDPRG[2] waltz16  
PCPD2 90.00 usec  
PLW2 14.00000000 W  
PLW12 0.17284000 W  
PLW13 0.14000000 W

F2 - Processing parameters  
SI 32768  
SF 75.4677415 MHz  
WDW EM  
SSB 0  
LB 1.00 Hz  
GB 0  
PC 1.40

3sjwei 4436 xh1-1-66-h-fr 1h cdcl3

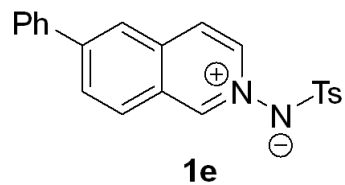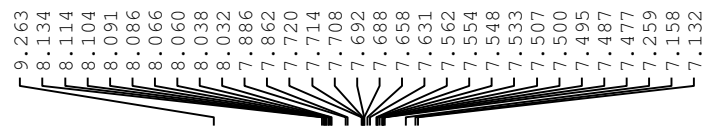

2.339

Current Data Parameters  
NAME 2021-4--11Project 1 data  
EXPNO 4436  
PROCNO 1

F2 - Acquisition Parameters  
Date\_ 20210706  
Time 9.14  
INSTRUM spect  
PROBHD 5 mm PABBO BB-  
PULPROG zg30  
TD 65536  
SOLVENT CDC13  
NS 16  
DS 2  
SWH 6009.615 Hz  
FIDRES 0.091699 Hz  
AQ 5.4525952 sec  
RG 181  
DW 83.200 usec  
DE 6.50 usec  
TE 296.2 K  
D1 1.00000000 sec  
TD0 1

==== CHANNEL f1 =====  
SFO1 300.1318534 MHz  
NUC1 1H  
P1 10.00 usec  
PLW1 14.00000000 W

F2 - Processing parameters  
SI 65536  
SF 300.1300075 MHz  
WDW EM  
SSB 0  
LB 0.30 Hz  
GB 0  
PC 1.00

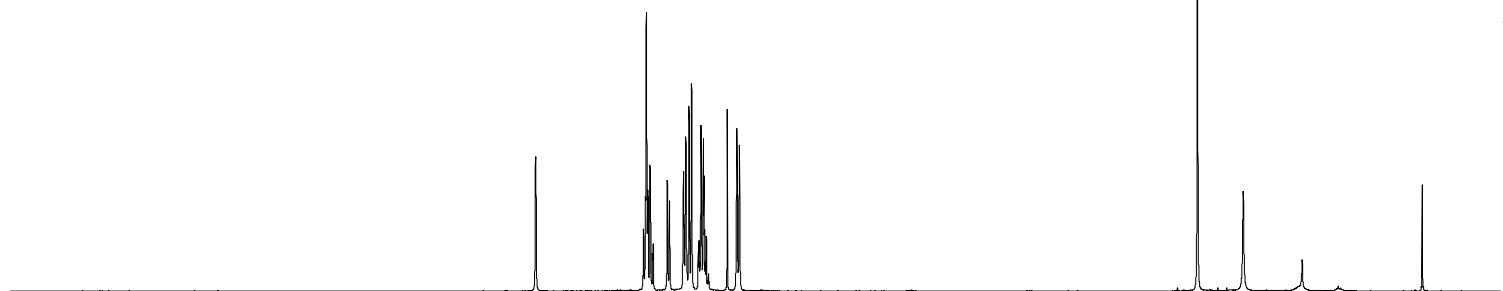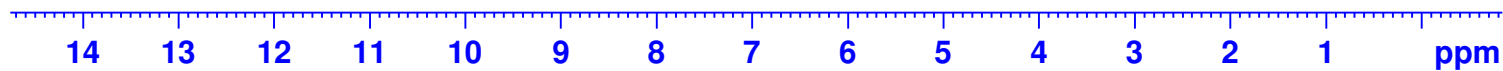

1.00  
4.21  
1.01  
4.16  
3.11  
2.09

3.14

3sjwei 4459 xh1-1-66-1c-fr 13c cdcl3

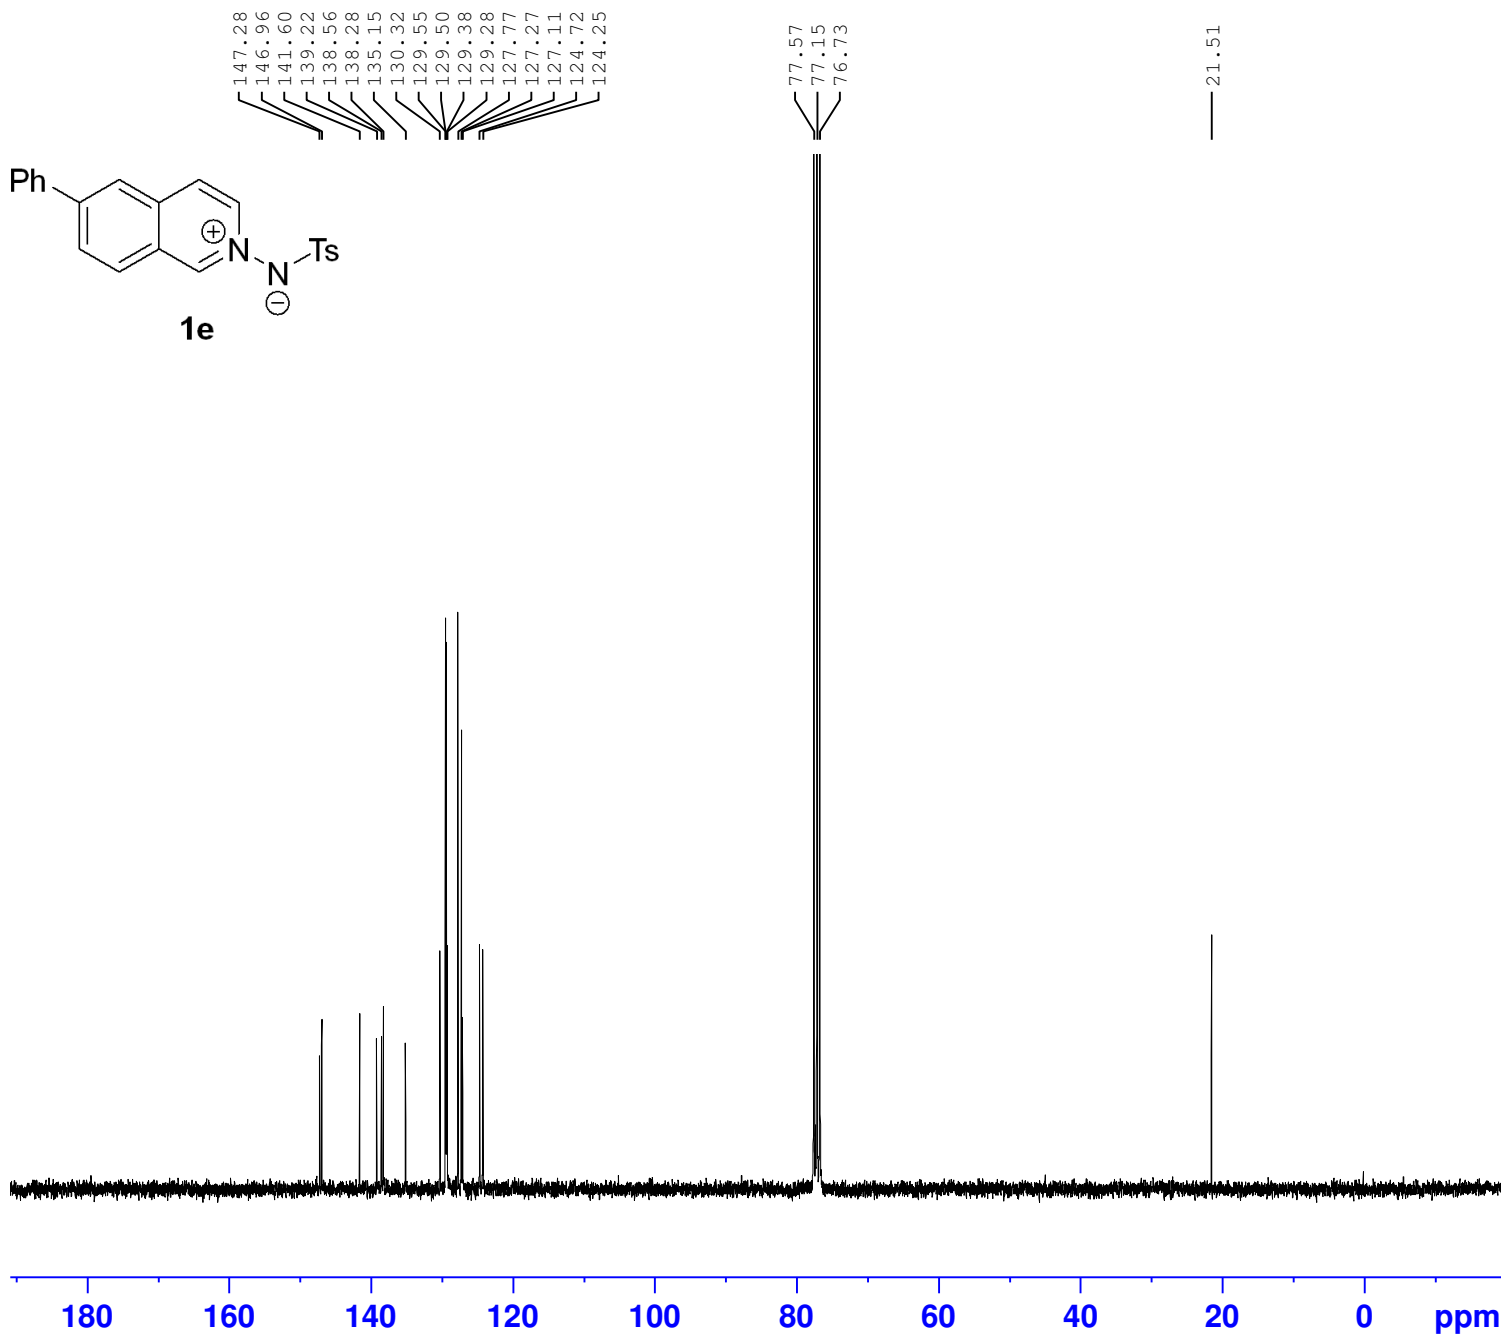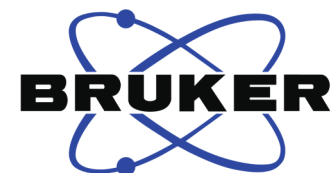

Current Data Parameters  
NAME 2021-4--11Project 1 data  
EXPNO 4459  
PROCNO 1

F2 - Acquisition Parameters  
Date\_ 20210707  
Time 4.10  
INSTRUM spect  
PROBHD 5 mm PABBO BB-  
PULPROG zgpg30  
TD 65536  
SOLVENT CDCl3  
NS 1024  
DS 4  
SWH 18028.846 Hz  
FIDRES 0.275098 Hz  
AQ 1.8175317 sec  
RG 203  
DW 27.733 usec  
DE 6.50 usec  
TE 296.1 K  
D1 2.00000000 sec  
D11 0.03000000 sec  
TD0 1

==== CHANNEL f1 =====  
SFO1 75.4752949 MHz  
NUC1 13C  
P1 9.50 usec  
PLW1 34.20000076 W

==== CHANNEL f2 =====  
SFO2 300.1312005 MHz  
NUC2 1H  
CPDPRG[2] waltz16  
PCPD2 90.00 usec  
PLW2 14.00000000 W  
PLW12 0.17284000 W  
PLW13 0.14000000 W

F2 - Processing parameters  
SI 32768  
SF 75.4677426 MHz  
WDW EM  
SSB 0  
LB 1.00 Hz  
GB 0  
PC 1.40

3sjwei 4437 xh1-2-13-h-fr 1h cdcl3

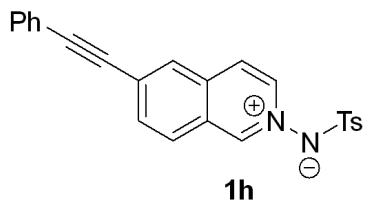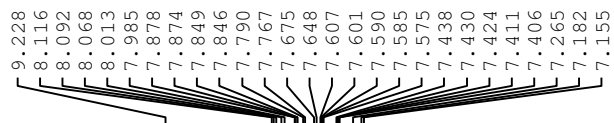

— 2.358



Current Data Parameters  
NAME 2021-4--11Project 1 data  
EXPNO 4437  
PROCNO 1

F2 - Acquisition Parameters  
Date\_ 20210706  
Time 9.19  
INSTRUM spect  
PROBHD 5 mm PABBO BB-  
PULPROG zg30  
TD 65536  
SOLVENT CDC13  
NS 16  
DS 2  
SWH 6009.615 Hz  
FIDRES 0.091699 Hz  
AQ 5.4525952 sec  
RG 203  
DW 83.200 usec  
DE 6.50 usec  
TE 296.1 K  
D1 1.00000000 sec  
TD0 1

==== CHANNEL f1 =====  
SFO1 300.1318534 MHz  
NUC1 1H  
P1 10.00 usec  
PLW1 14.00000000 W

F2 - Processing parameters  
SI 65536  
SF 300.1300057 MHz  
WDW EM  
SSB 0  
LB 0.30 Hz  
GB 0  
PC 1.00

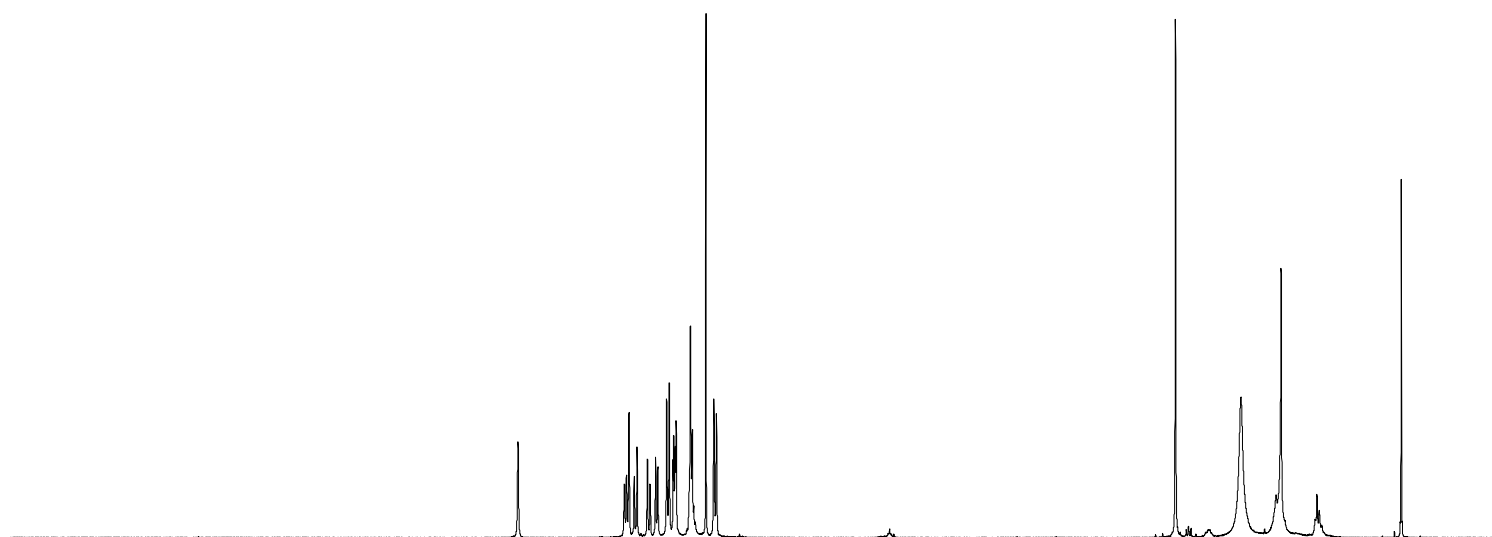

14 13 12 11 10 9 8 7 6 5 4 3 2 1 0 ppm

0.90  
1.98  
1.03  
1.03  
1.05  
2.06  
2.08  
3.09  
2.02

3.00



3sjwei 4512 xh1-2-13-c-fr 13c cdcl3

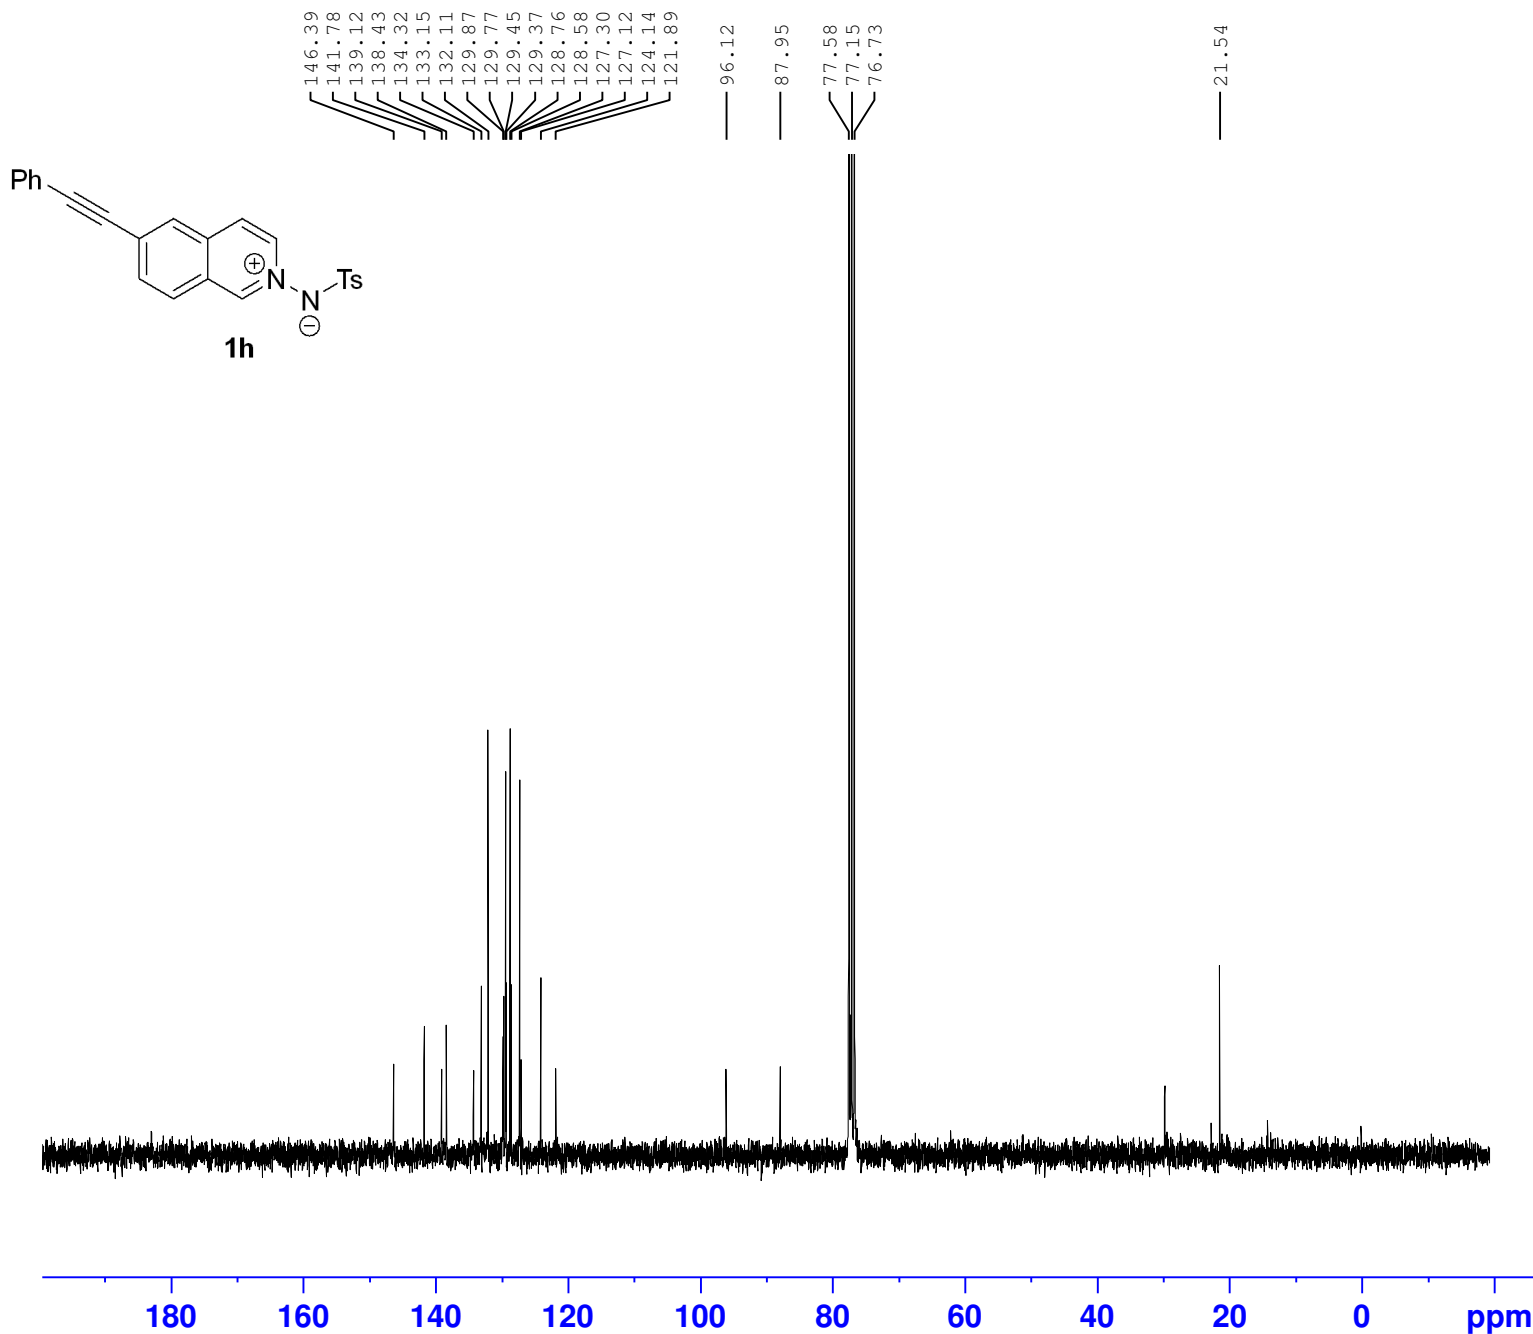

Current Data Parameters  
NAME 2021-4--11Project 1 data  
EXPNO 4512  
PROCNO 1

F2 - Acquisition Parameters  
Date\_ 20210708  
Time 12.51  
INSTRUM spect  
PROBHD 5 mm PABBO BB-  
PULPROG zgpg30  
TD 65536  
SOLVENT CDCl3  
NS 1024  
DS 4  
SWH 18028.846 Hz  
FIDRES 0.275098 Hz  
AQ 1.8175317 sec  
RG 203  
DW 27.733 usec  
DE 6.50 usec  
TE 296.1 K  
D1 2.00000000 sec  
D11 0.03000000 sec  
TD0 1

===== CHANNEL f1 =====  
SFO1 75.4752949 MHz  
NUC1 13C  
P1 9.50 usec  
PLW1 34.20000076 W

===== CHANNEL f2 =====  
SFO2 300.1312005 MHz  
NUC2 1H  
CPDPRG[2] waltz16  
PCPD2 90.00 usec  
PLW2 14.00000000 W  
PLW12 0.17284000 W  
PLW13 0.14000000 W

F2 - Processing parameters  
SI 32768  
SF 75.4677404 MHz  
WDW EM  
SSB 0  
LB 1.00 Hz  
GB 0  
PC 1.40

3sjwei 6002 xh1 1h dms0

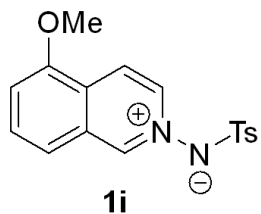

9.485  
8.239  
8.216  
8.067  
8.063  
8.044  
8.039  
7.891  
7.865  
7.849  
7.824  
7.797  
7.501  
7.477  
7.420  
7.393  
7.210  
7.183

4.014  
3.352  
2.504  
2.498  
2.294

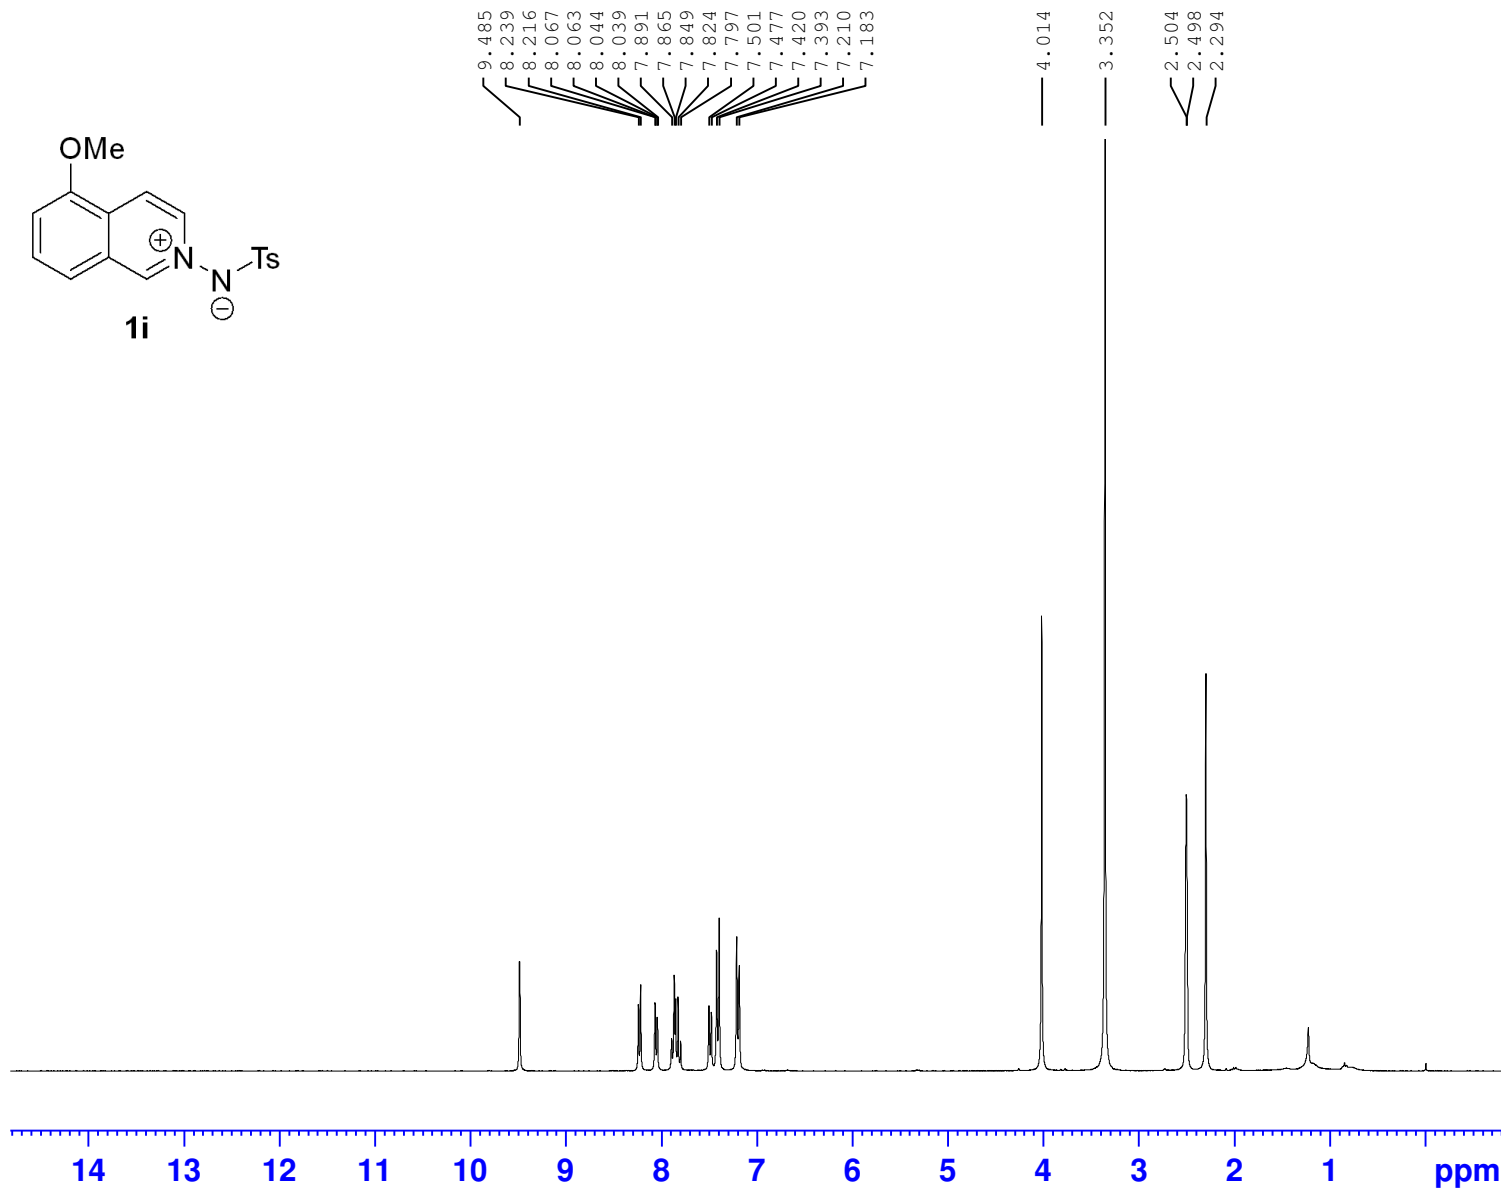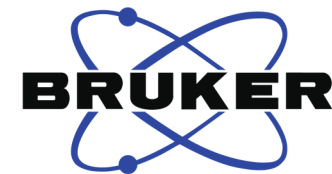

Current Data Parameters  
NAME 220721-300M  
EXPNO 6002  
PROCNO 1

F2 - Acquisition Parameters  
Date\_ 20220721  
Time 14.08  
INSTRUM spect  
PROBHD 5 mm PABBO BB-  
PULPROG zg30  
TD 65536  
SOLVENT DMSO  
NS 16  
DS 2  
SWH 6009.615 Hz  
FIDRES 0.091699 Hz  
AQ 5.4525952 sec  
RG 203  
DW 83.200 usec  
DE 6.50 usec  
TE -59.1 K  
D1 1.00000000 sec  
TD0 1

==== CHANNEL f1 =====  
SFO1 300.1318534 MHz  
NUC1 1H  
P1 10.00 usec  
PLW1 14.00000000 W

F2 - Processing parameters  
SI 65536  
SF 300.1300024 MHz  
WDW EM  
SSB 0  
LB 0.30 Hz  
GB 0  
PC 1.00

XHL-1-41

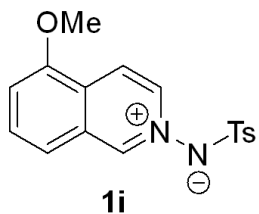

153.83  
147.36  
140.82  
139.42  
137.22  
131.51  
129.24  
128.76  
126.55  
126.07  
120.21  
119.66  
112.68

56.37  
40.12  
39.91  
39.71  
39.50  
39.29  
39.08  
38.87  
20.86

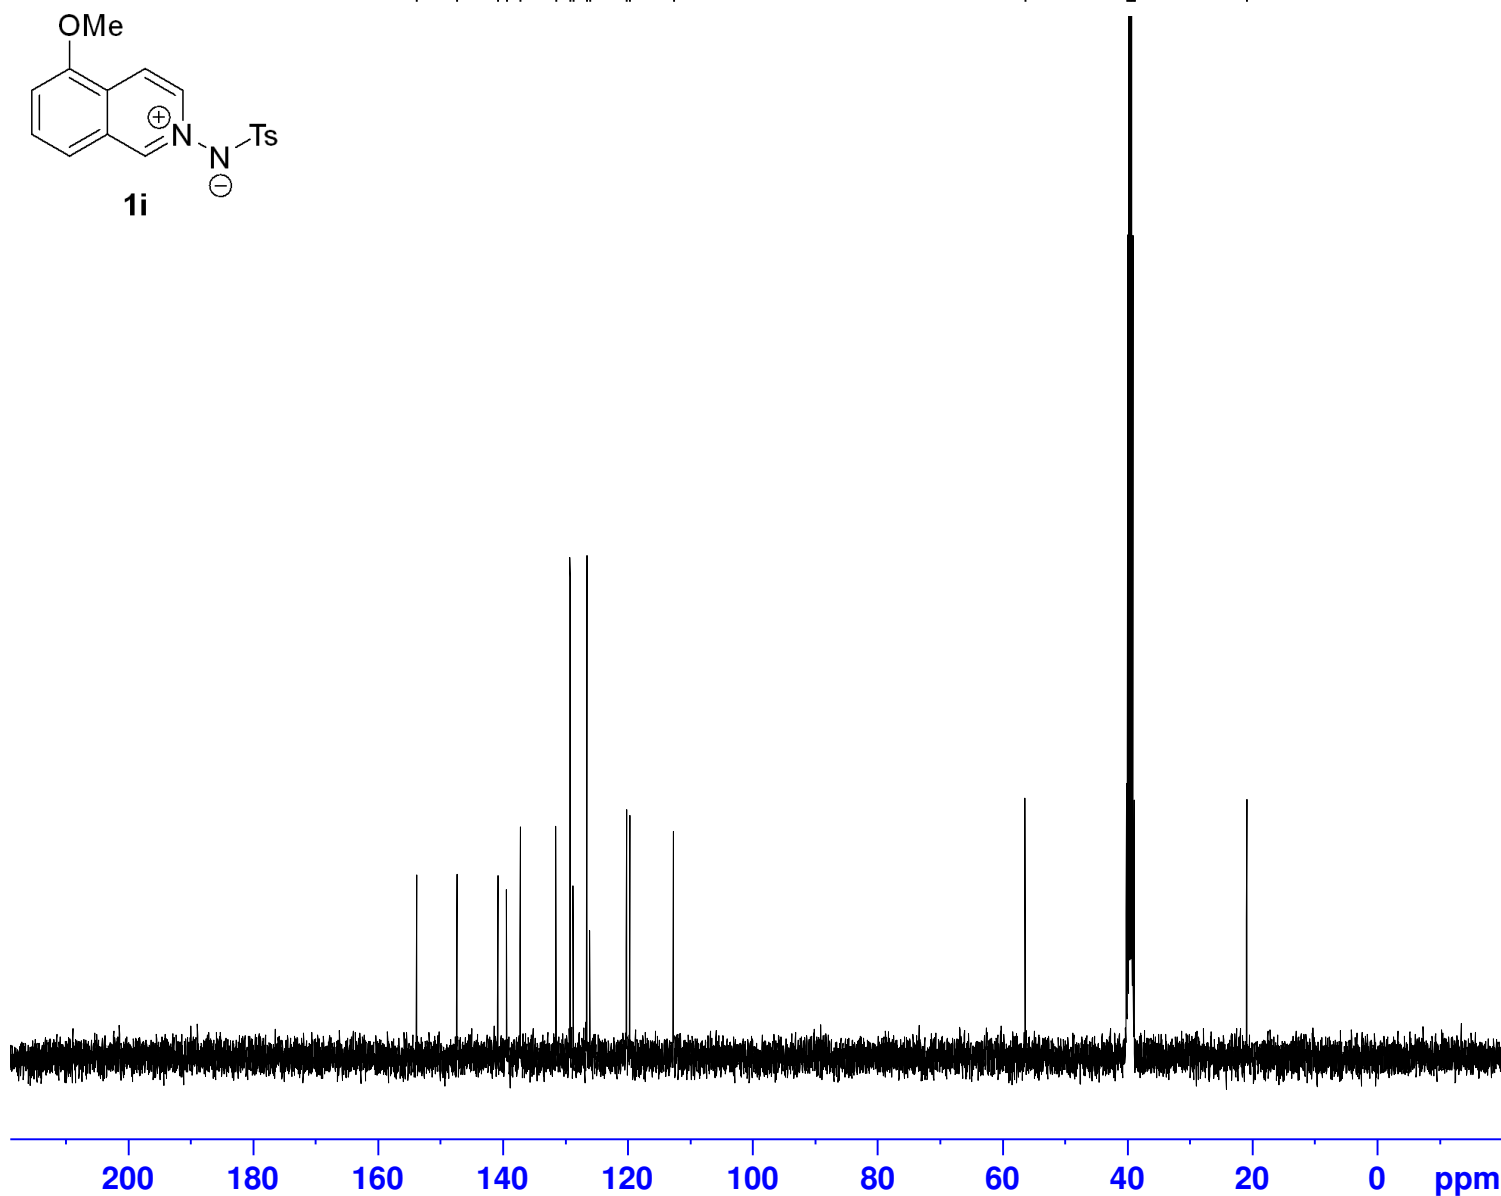

Current Data Parameters  
NAME 220721-400  
EXPNO 41  
PROCNO 1

F2 - Acquisition Parameters  
Date\_ 20220721  
Time 19.26  
INSTRUM spect  
PROBHD 5 mm PABBO BB-  
PULPROG zgpg30  
TD 65536  
SOLVENT DMSO  
NS 50  
DS 0  
SWH 24038.461 Hz  
FIDRES 0.366798 Hz  
AQ 1.3631488 sec  
RG 193.13  
DW 20.800 usec  
DE 6.50 usec  
TE 295.0 K  
D1 2.00000000 sec  
D11 0.03000000 sec  
TD0 1

==== CHANNEL f1 =====  
NUC1 13C  
P1 12.00 usec  
PLW1 53.00000000 W  
SFO1 100.6379178 MHz

==== CHANNEL f2 =====  
CPDPRG[2] waltz16  
NUC2 1H  
PCPD2 90.00 usec  
PLW2 14.00000000 W  
PLW12 0.37246999 W  
PLW13 0.30170000 W  
SFO2 400.1916008 MHz

F2 - Processing parameters  
SI 32768  
SF 100.6279047 MHz  
WDW EM  
SSB 0  
LB 1.00 Hz  
GB 0  
PC 1.40

xh1-5-38

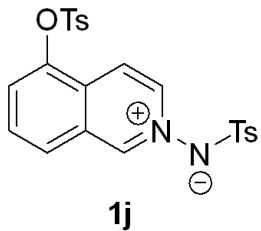

9.341  
8.041  
8.038  
8.023  
8.020  
7.966  
7.945  
7.828  
7.810  
7.764  
7.758  
7.744  
7.738  
7.724  
7.660  
7.639  
7.633  
7.613  
7.352  
7.331  
7.260  
7.185  
7.164

2.465  
2.360



Current Data Parameters  
NAME 220728-400  
EXPNO 93  
PROCNO 1

F2 - Acquisition Parameters  
Date\_ 20220728  
Time 21.58  
INSTRUM spect  
PROBHD 5 mm PABBO BB-  
PULPROG zg30  
TD 65536  
SOLVENT CDCl3  
NS 8  
DS 2  
SWH 8223.685 Hz  
FIDRES 0.125483 Hz  
AQ 3.9845889 sec  
RG 193.13  
DW 60.800 usec  
DE 6.50 usec  
TE 294.7 K  
D1 1.00000000 sec  
TD0 1

==== CHANNEL f1 =====  
NUC1 1H  
P1 14.68 usec  
PLW1 14.00000000 W  
SFO1 400.1924713 MHz

F2 - Processing parameters  
SI 65536  
SF 400.1900162 MHz  
WDW EM  
SSB 0  
LB 0.30 Hz  
GB 0  
PC 1.00

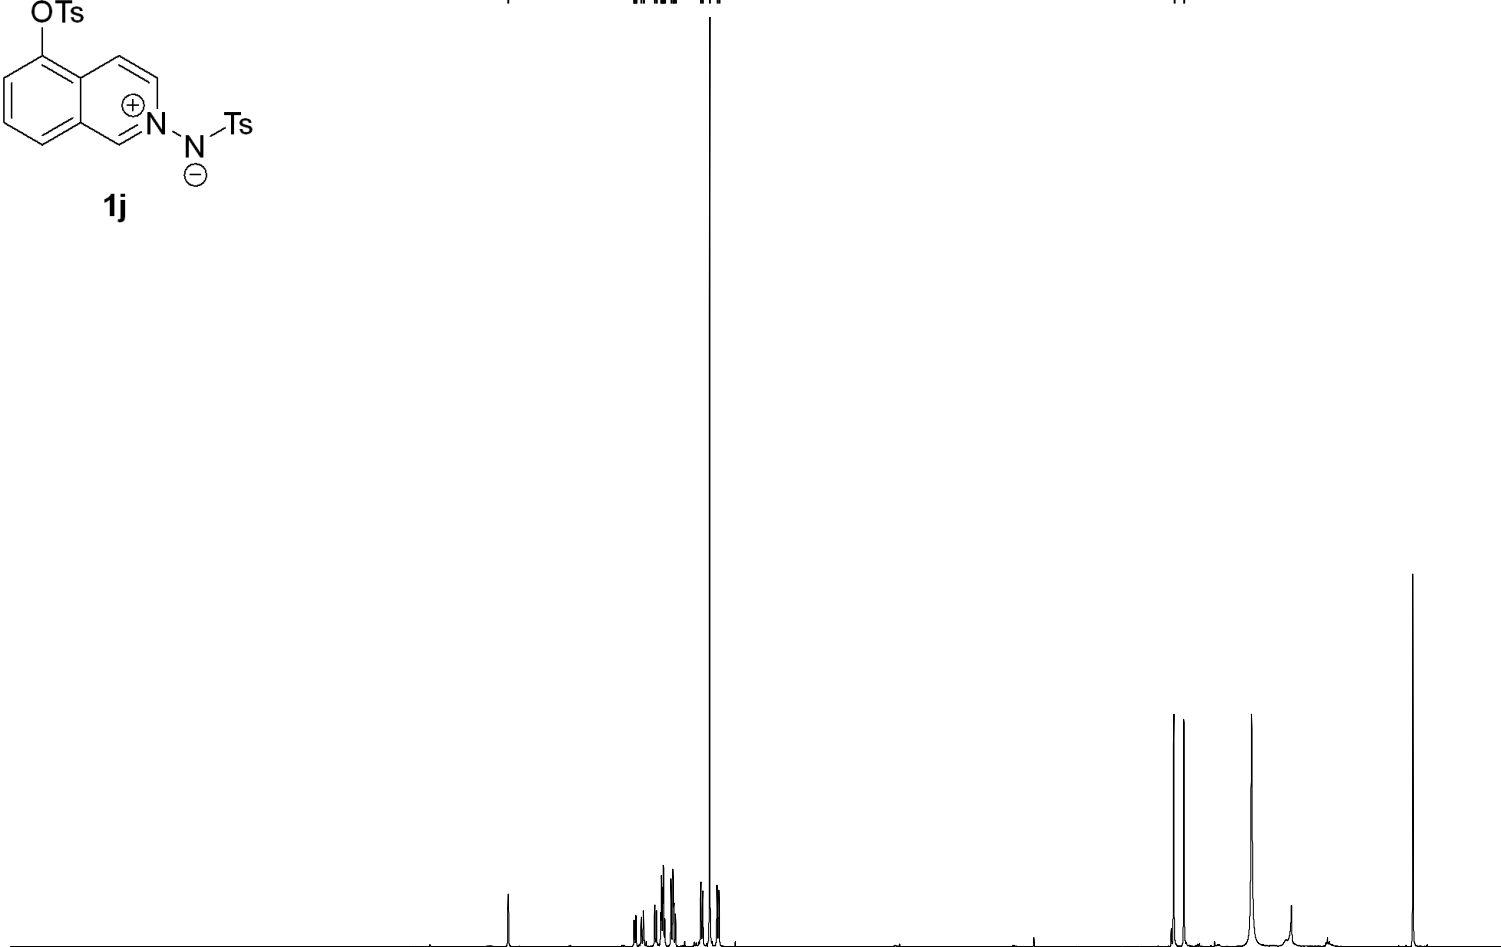

14 13 12 11 10 9 8 7 6 5 4 3 2 1 ppm

0.98  
1.02  
0.96  
1.08  
3.03  
2.96  
2.09  
2.07

3.36  
3.05

XHL-5-38

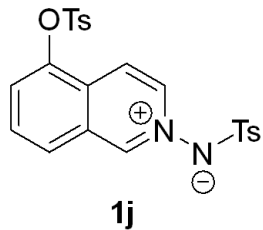

146.91  
145.44  
144.89  
142.05  
138.83  
137.97  
131.63  
130.76  
130.45  
129.53  
129.36  
128.67  
128.58  
127.33  
127.28  
126.50  
119.59

77.46  
77.15  
76.83

29.82  
21.96  
21.56

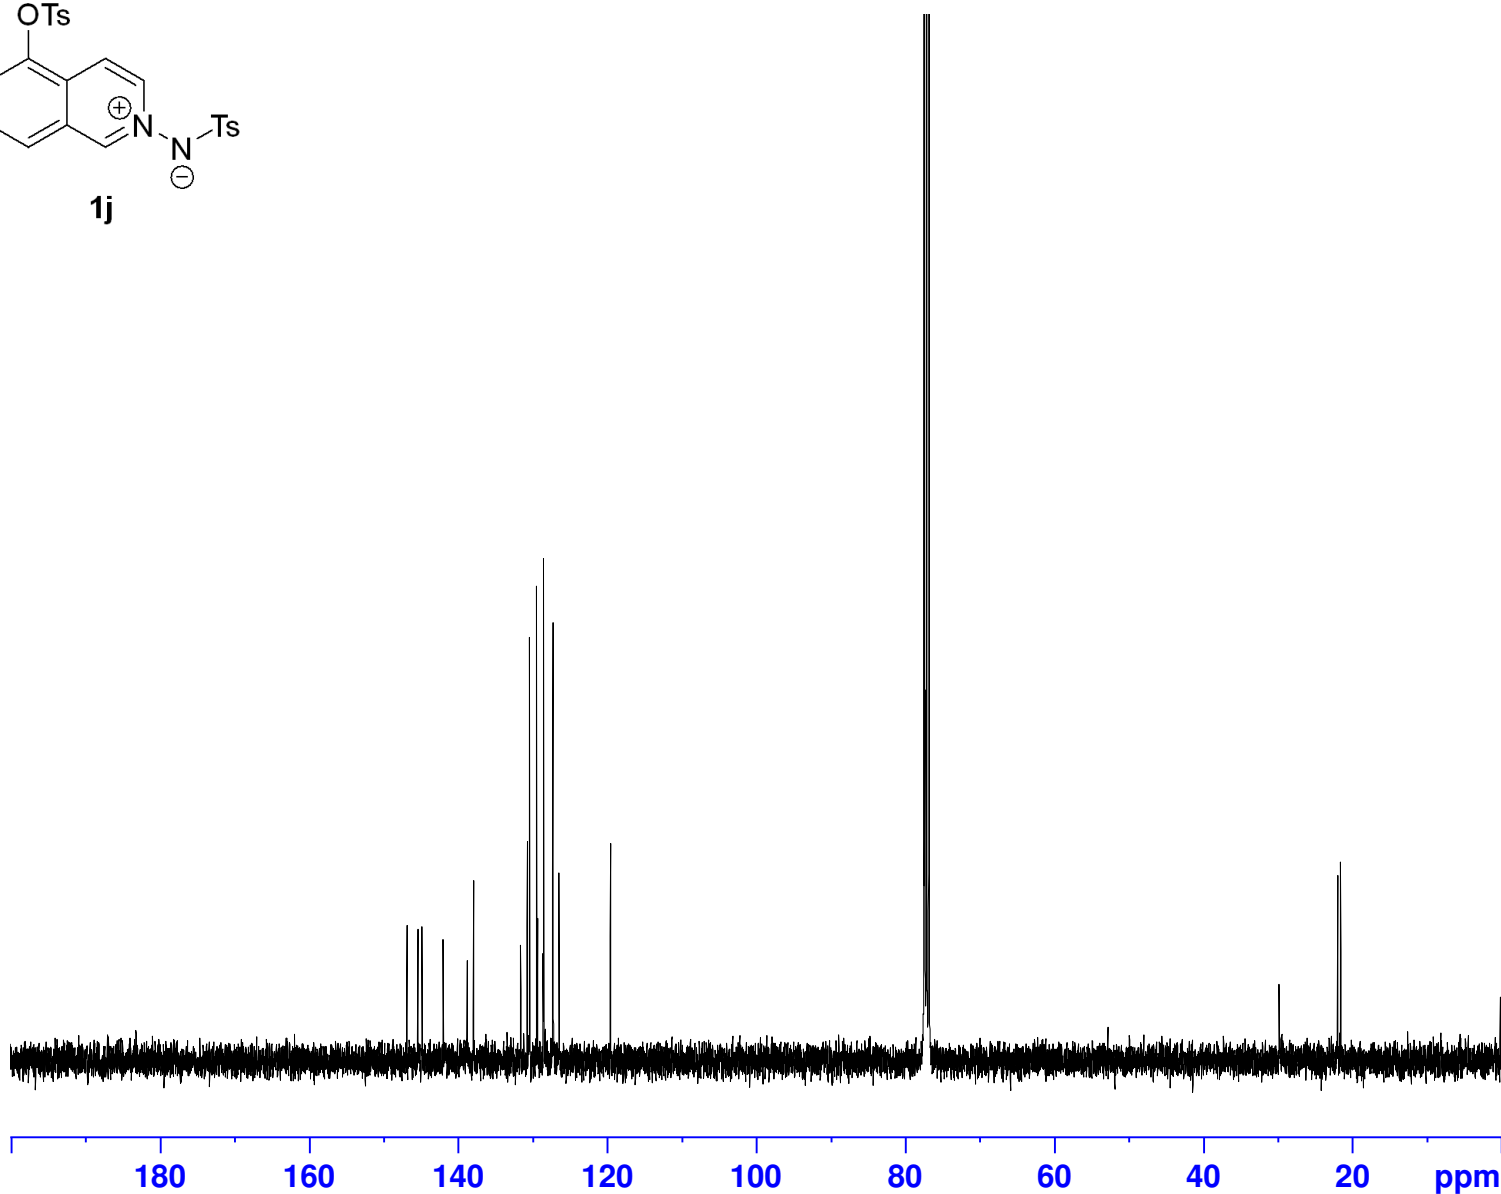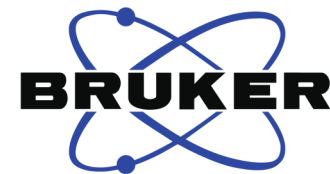

Current Data Parameters  
NAME 220730-400  
EXPNO 119  
PROCNO 1

F2 - Acquisition Parameters  
Date\_ 20220729  
Time 23.37  
INSTRUM spect  
PROBHD 5 mm PABBO BB-  
PULPROG zgpg30  
TD 65536  
SOLVENT CDC13  
NS 1024  
DS 4  
SWH 24038.461 Hz  
FIDRES 0.366798 Hz  
AQ 1.3631488 sec  
RG 193.13  
DW 20.800 usec  
DE 6.50 usec  
TE 295.6 K  
D1 2.00000000 sec  
D11 0.03000000 sec  
TD0 1

==== CHANNEL f1 =====  
NUC1 13C  
P1 12.00 usec  
PLW1 53.00000000 W  
SFO1 100.6379178 MHz

==== CHANNEL f2 =====  
CPDPRG[2] waltz16  
NUC2 1H  
PCPD2 90.00 usec  
PLW2 14.00000000 W  
PLW12 0.37246999 W  
PLW13 0.30170000 W  
SFO2 400.1916008 MHz

F2 - Processing parameters  
SI 32768  
SF 100.6278459 MHz  
WDW EM  
SSB 0  
LB 1.00 Hz  
GB 0  
PC 1.40

3sjwei 5597 xh1-3-2 1h dms0

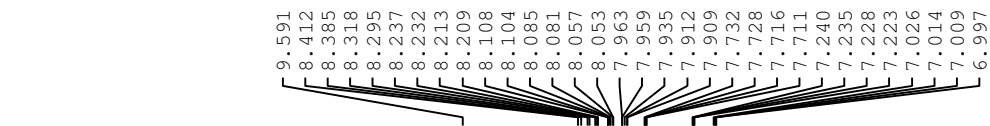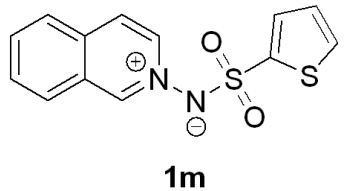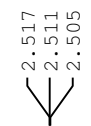

Current Data Parameters  
NAME 2021-4--11Project 1 data  
EXPNO 5597  
PROCNO 1

F2 - Acquisition Parameters  
Date\_ 20211030  
Time 3.34  
INSTRUM spect  
PROBHD 5 mm PABBO BB-  
PULPROG zg30  
TD 65536  
SOLVENT DMSO  
NS 16  
DS 2  
SWH 6009.615 Hz  
FIDRES 0.091699 Hz  
AQ 5.4525952 sec  
RG 203  
DW 83.200 usec  
DE 6.50 usec  
TE -59.1 K  
D1 1.00000000 sec  
TD0 1

==== CHANNEL f1 =====  
SFO1 300.1318534 MHz  
NUC1 1H  
P1 10.00 usec  
PLW1 14.00000000 W

F2 - Processing parameters  
SI 65536  
SF 300.1299989 MHz  
WDW EM  
SSB 0  
LB 0.30 Hz  
GB 0  
PC 1.00

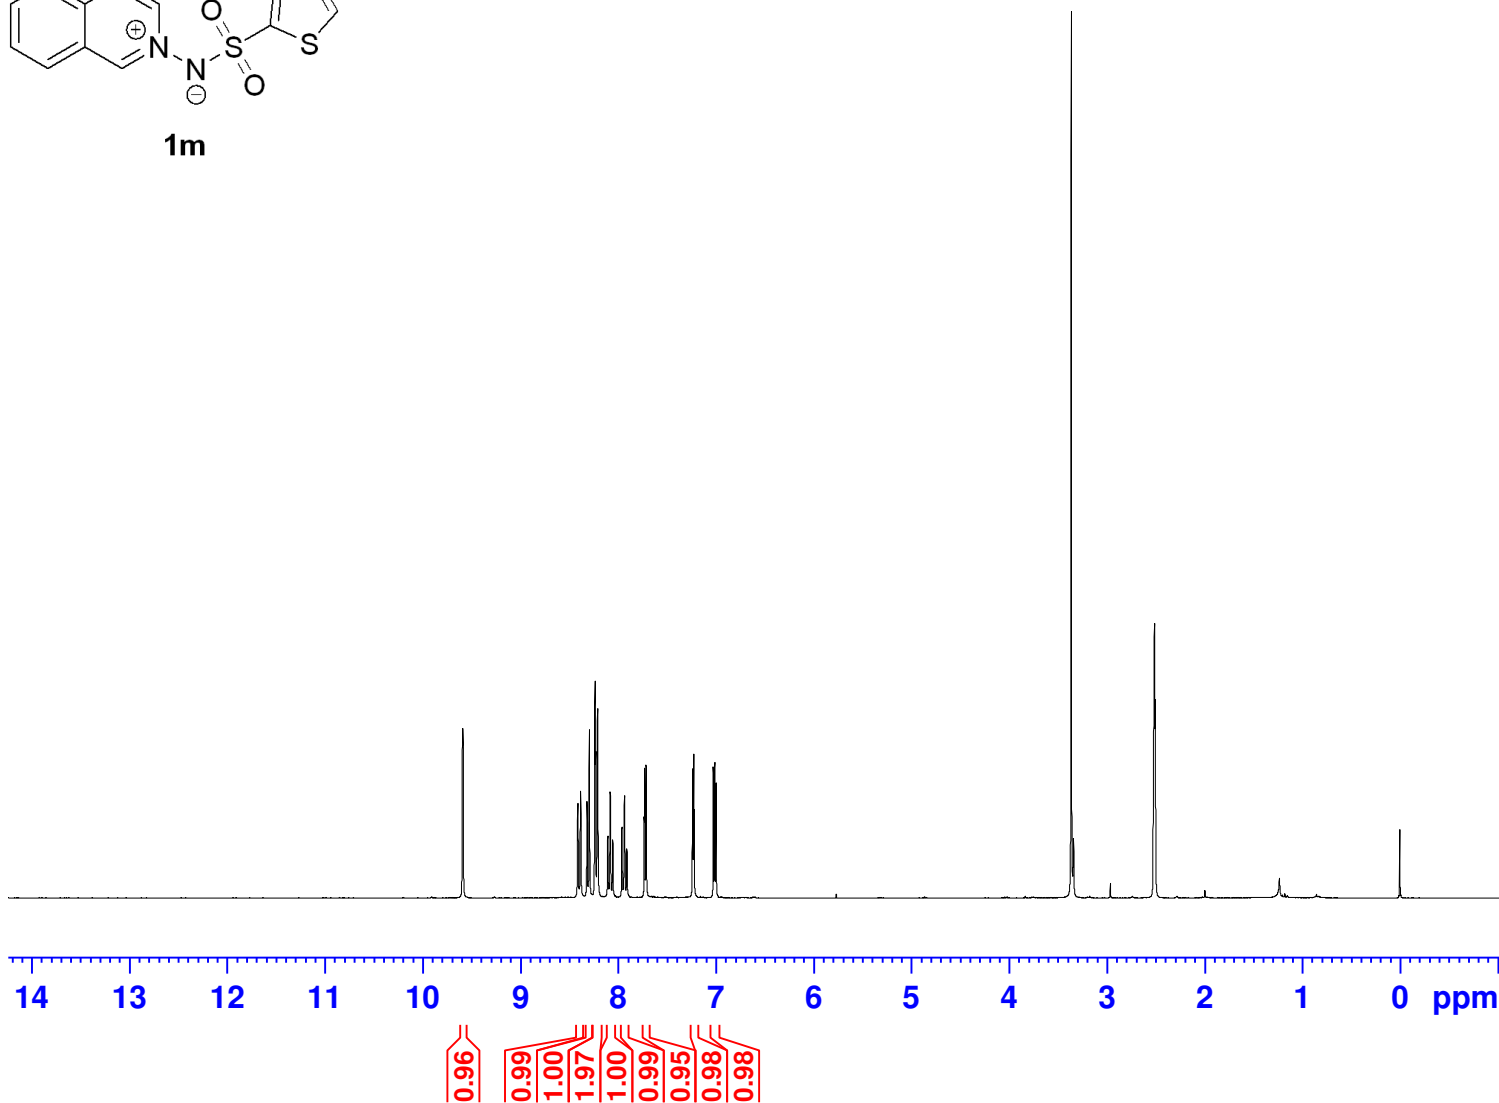

3sjwei 5598 xhl-3-2 13c dms0

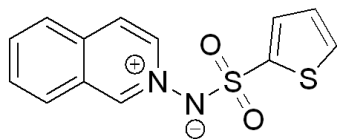

1m

148.19  
143.75  
137.67  
134.84  
134.69  
130.71  
130.49  
129.97  
129.14  
127.71  
127.19  
126.99  
125.29

40.32  
40.04  
39.77  
39.49  
39.21  
38.93  
38.65

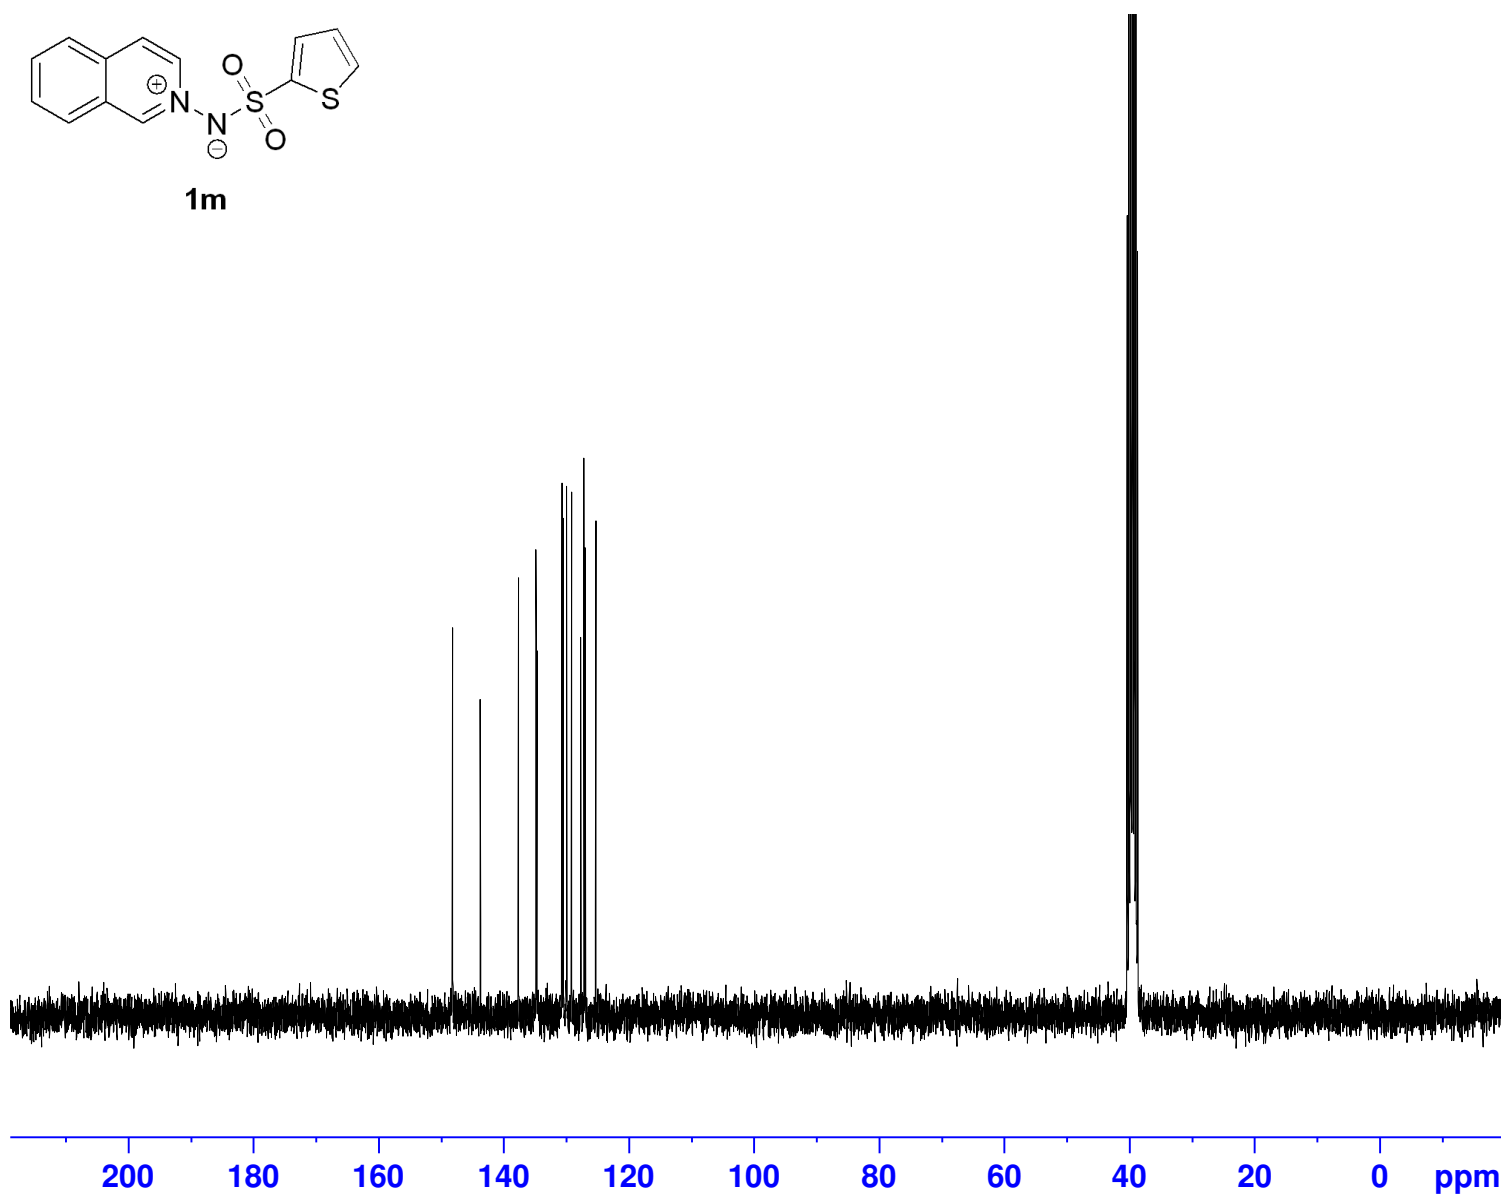

Current Data Parameters  
NAME 2021-4--11Project 1 data  
EXPNO 5598  
PROCNO 1

F2 - Acquisition Parameters  
Date\_ 20211030  
Time 4.42  
INSTRUM spect  
PROBHD 5 mm PABBO BB-  
PULPROG zgpg30  
TD 65536  
SOLVENT DMSO  
NS 1024  
DS 4  
SWH 18028.846 Hz  
FIDRES 0.275098 Hz  
AQ 1.8175317 sec  
RG 203  
DW 27.733 usec  
DE 6.50 usec  
TE -59.1 K  
D1 2.00000000 sec  
D11 0.03000000 sec  
TD0 1

===== CHANNEL f1 =====  
SFO1 75.4752949 MHz  
NUC1 13C  
P1 9.50 usec  
PLW1 34.20000076 W

===== CHANNEL f2 =====  
SFO2 300.1312005 MHz  
NUC2 1H  
CPDPRG[2] waltz16  
PCPD2 90.00 usec  
PLW2 14.00000000 W  
PLW12 0.17284000 W  
PLW13 0.14000000 W

F2 - Processing parameters  
SI 32768  
SF 75.4677850 MHz  
WDW EM  
SSB 0  
LB 1.00 Hz  
GB 0  
PC 1.40

3sjwei 5595 xh1-2-100 1h dms0

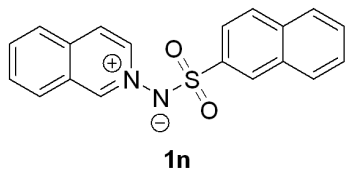

9.611  
8.365  
8.338  
8.199  
8.176  
8.149  
8.095  
8.089  
8.072  
8.066  
8.041  
8.037  
8.023  
8.014  
8.010  
7.994  
7.964  
7.943  
7.922  
7.919  
7.895  
7.871  
7.868  
7.727  
7.721  
7.698  
7.692  
7.635  
7.631  
7.612  
7.608  
7.586  
7.581  
7.569  
7.564  
7.542  
7.538  
7.519  
7.515

2.515  
2.509  
2.503

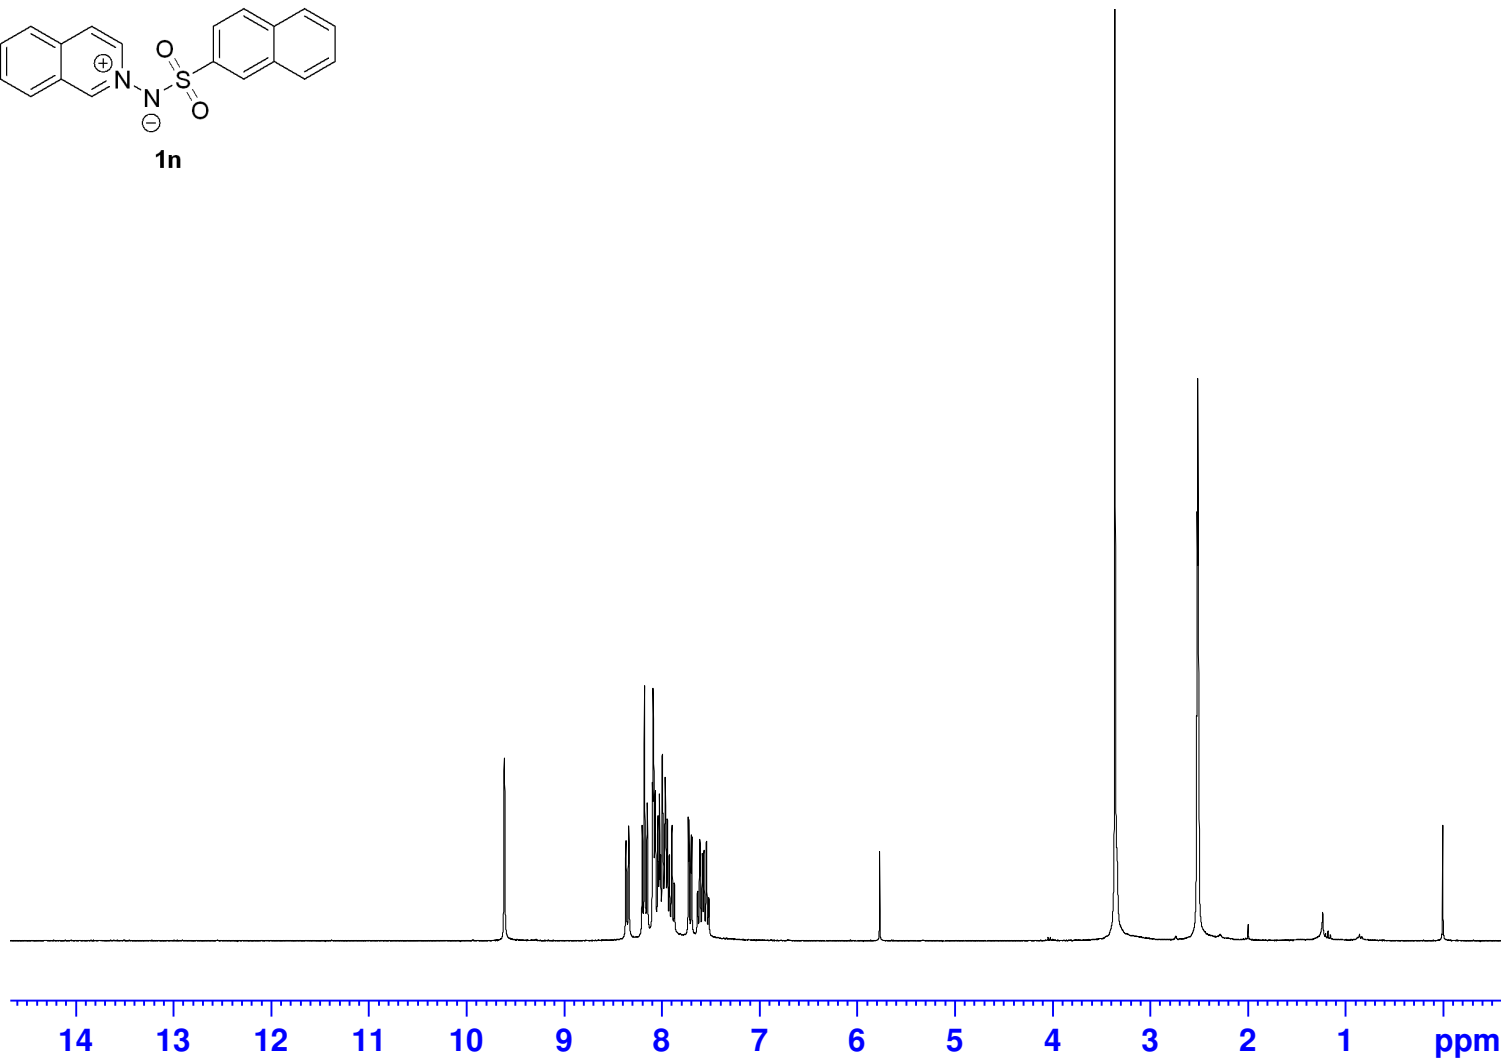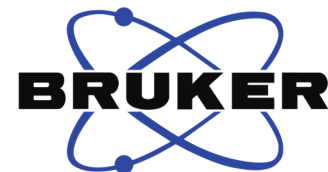

Current Data Parameters  
NAME 2021-4--11Project 1 data  
EXPNO 5595  
PROCNO 1

F2 - Acquisition Parameters  
Date\_ 20211030  
Time 2.22  
INSTRUM spect  
PROBHD 5 mm PABBO BB-  
PULPROG zg30  
TD 65536  
SOLVENT DMSO  
NS 16  
DS 2  
SWH 6009.615 Hz  
FIDRES 0.091699 Hz  
AQ 5.4525952 sec  
RG 203  
DW 83.200 usec  
DE 6.50 usec  
TE -59.1 K  
D1 1.00000000 sec  
TD0 1

==== CHANNEL f1 =====  
SFO1 300.1318534 MHz  
NUC1 1H  
P1 10.00 usec  
PLW1 14.00000000 W

F2 - Processing parameters  
SI 65536  
SF 300.1299995 MHz  
WDW EM  
SSB 0  
LB 0.30 Hz  
GB 0  
PC 1.00

1.00  
1.07  
2.05  
7.67  
1.08  
2.18



3sjwei 5596 xhl-2-100 13c dms0

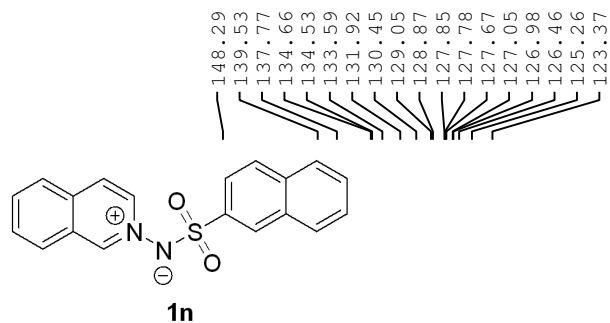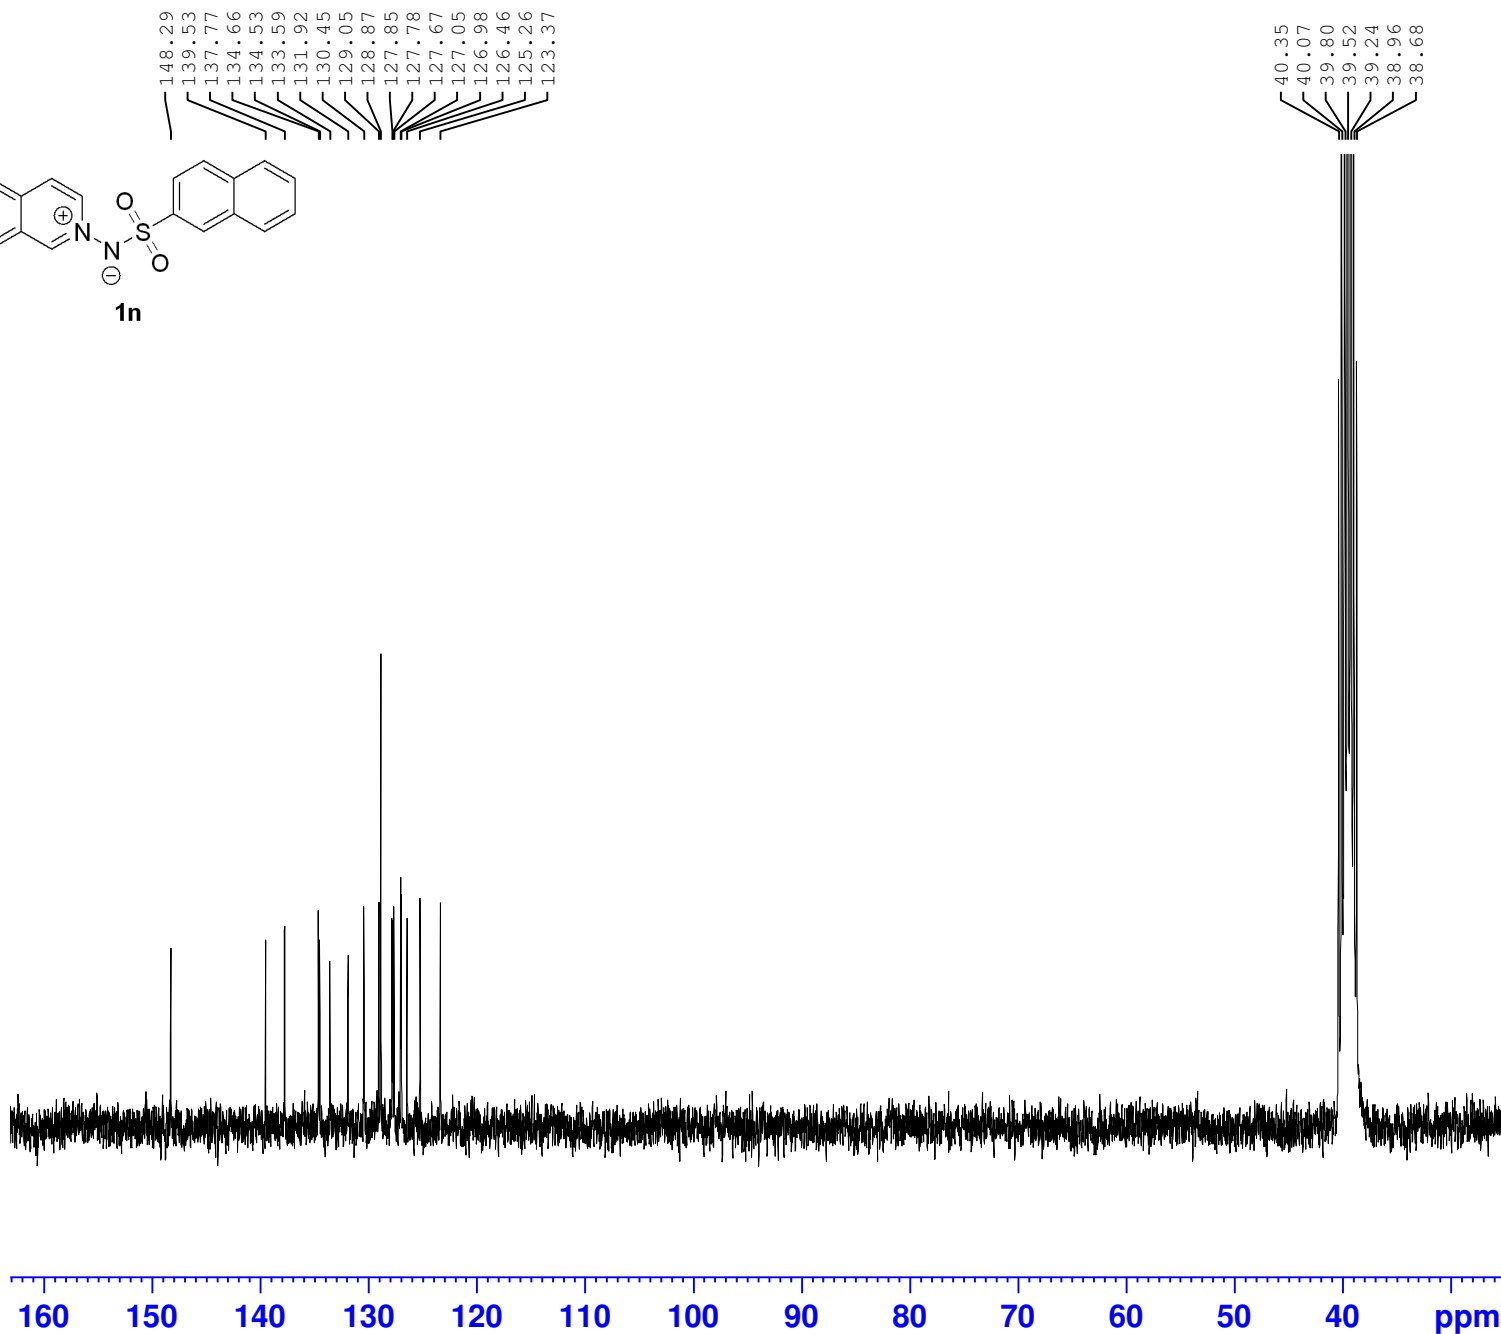

Current Data Parameters  
NAME 2021-4--11Project 1 data  
EXPNO 5596  
PROCNO 1

F2 - Acquisition Parameters  
Date\_ 20211030  
Time 3.29  
INSTRUM spect  
PROBHD 5 mm PABBO BB-  
PULPROG zgpg30  
TD 65536  
SOLVENT DMSO  
NS 1024  
DS 4  
SWH 18028.846 Hz  
FIDRES 0.275098 Hz  
AQ 1.8175317 sec  
RG 203  
DW 27.733 usec  
DE 6.50 usec  
TE -59.1 K  
D1 2.00000000 sec  
D11 0.03000000 sec  
TD0 1

===== CHANNEL f1 =====  
SFO1 75.4752949 MHz  
NUC1 13C  
P1 9.50 usec  
PLW1 34.20000076 W

===== CHANNEL f2 =====  
SFO2 300.1312005 MHz  
NUC2 1H  
CPDPRG[2] waltz16  
PCPD2 90.00 usec  
PLW2 14.00000000 W  
PLW12 0.17284000 W  
PLW13 0.14000000 W

F2 - Processing parameters  
SI 32768  
SF 75.4677828 MHz  
WDW EM  
SSB 0  
LB 1.00 Hz  
GB 0  
PC 1.40

3sjwei 4425 xh1-1-82-h-fr 1h cdcl3

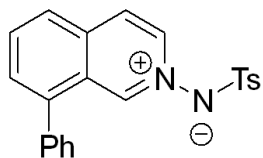

1o

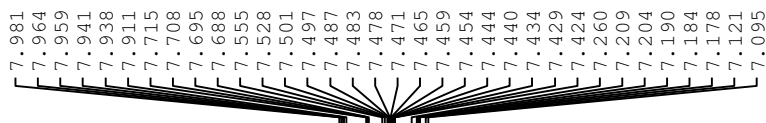

2.362



Current Data Parameters  
NAME 2021-4--11Project 1 data  
EXPNO 4425  
PROCNO 1

F2 - Acquisition Parameters  
Date\_ 20210704  
Time 22.35  
INSTRUM spect  
PROBHD 5 mm PABBO BB-  
PULPROG zg30  
TD 65536  
SOLVENT CDCl3  
NS 16  
DS 2  
SWH 6009.615 Hz  
FIDRES 0.091699 Hz  
AQ 5.4525952 sec  
RG 161  
DW 83.200 usec  
DE 6.50 usec  
TE 296.2 K  
D1 1.00000000 sec  
TD0 1

==== CHANNEL f1 =====  
SFO1 300.1318534 MHz  
NUC1 1H  
P1 10.00 usec  
PLW1 14.00000000 W

F2 - Processing parameters  
SI 65536  
SF 300.1300072 MHz  
WDW EM  
SSB 0  
LB 0.30 Hz  
GB 0  
PC 1.00

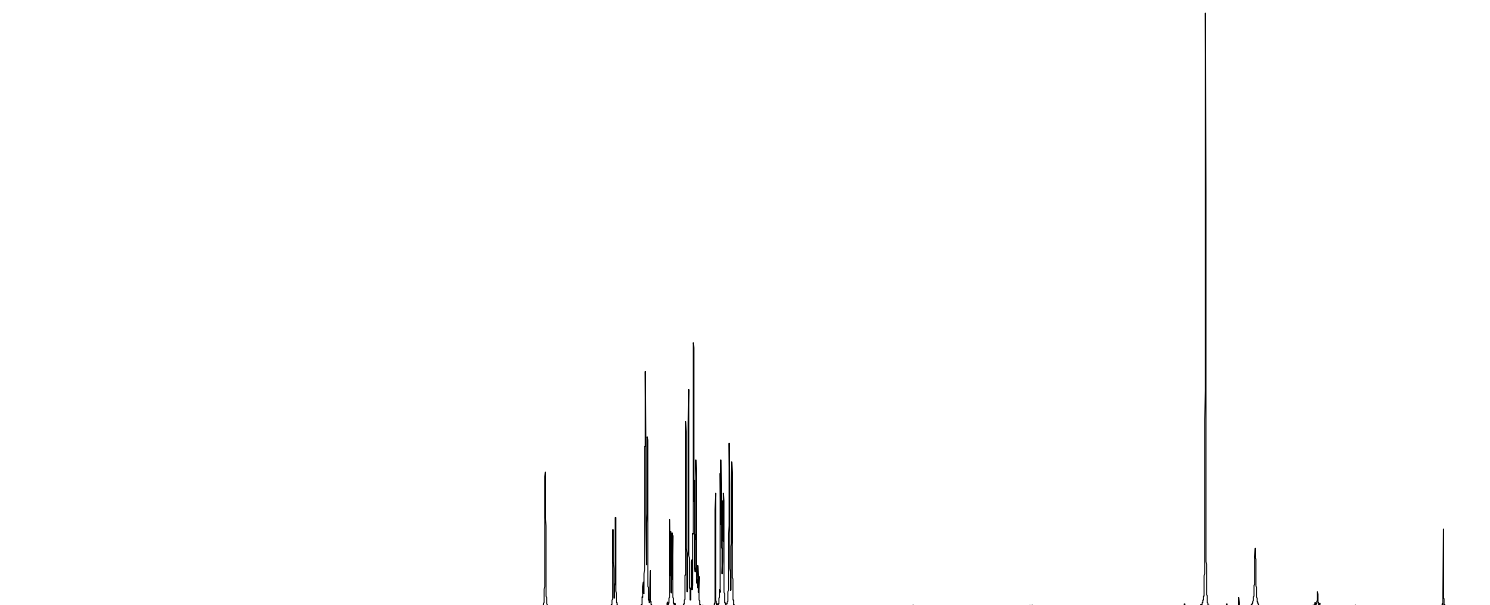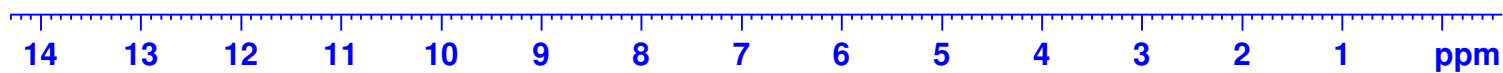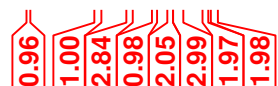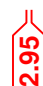

3sjwei 4426 xhl-1-82-c-fr 13c cdcl3

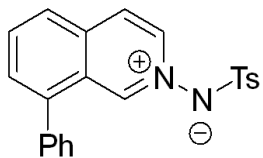

1o

146.28  
142.30  
141.42  
138.83  
138.25  
136.23  
135.15  
133.92  
130.99  
129.81  
129.34  
129.16  
129.06  
127.38  
126.54  
126.18  
124.91

77.57  
77.15  
76.73

21.54

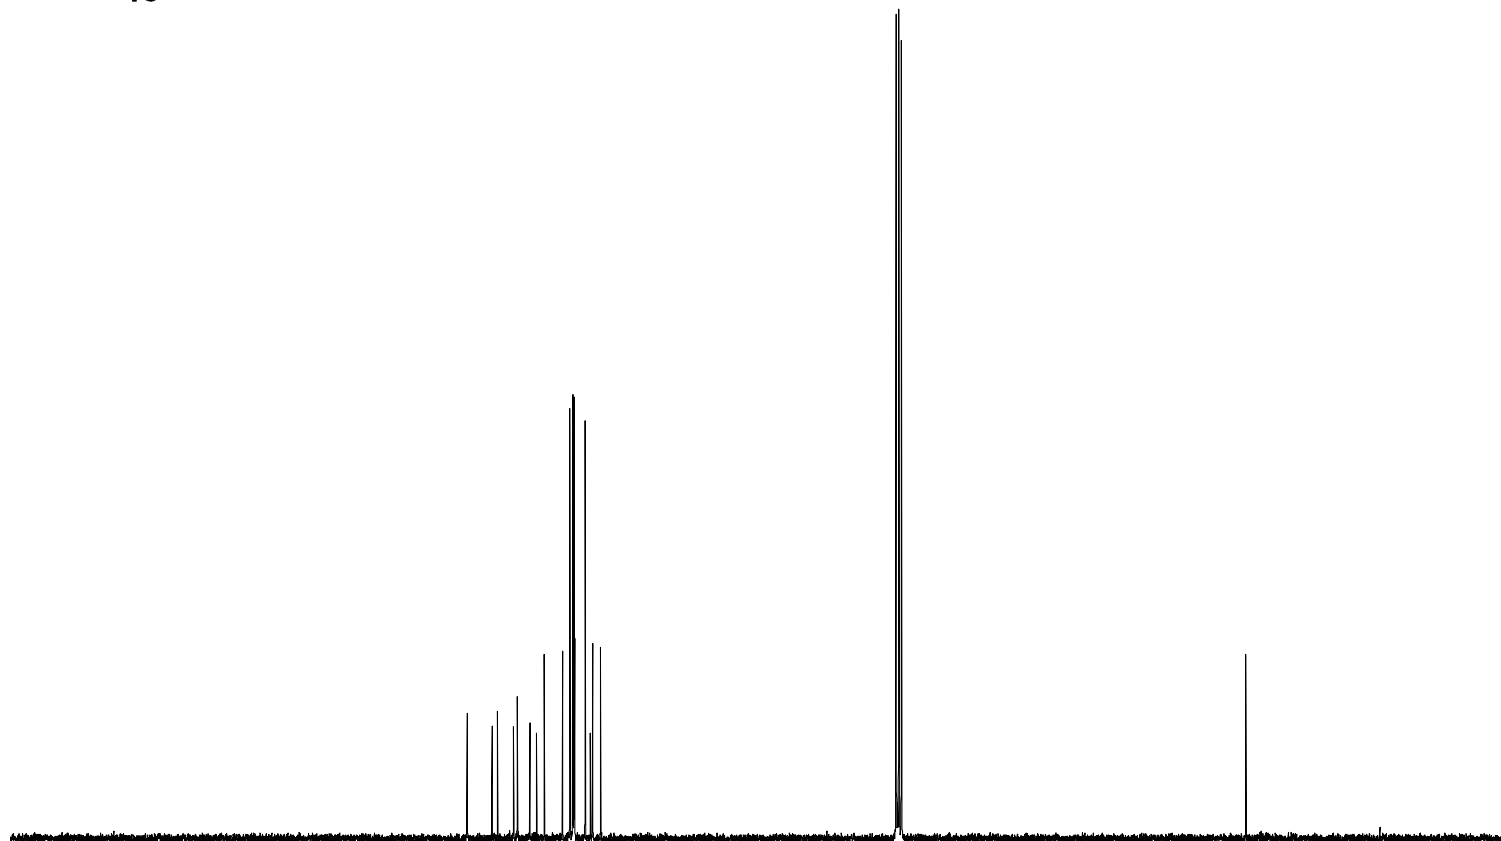

Current Data Parameters  
NAME 2021-4--11Project 1 data  
EXPNO 4426  
PROCNO 1

F2 - Acquisition Parameters  
Date\_ 20210704  
Time 23.43  
INSTRUM spect  
PROBHD 5 mm PABBO BB-  
PULPROG zgpg30  
TD 65536  
SOLVENT CDC13  
NS 1024  
DS 4  
SWH 18028.846 Hz  
FIDRES 0.275098 Hz  
AQ 1.8175317 sec  
RG 203  
DW 27.733 usec  
DE 6.50 usec  
TE 296.1 K  
D1 2.0000000 sec  
D11 0.0300000 sec  
TD0 1

===== CHANNEL f1 =====  
SFO1 75.4752949 MHz  
NUC1 13C  
P1 9.50 usec  
PLW1 34.2000076 W

===== CHANNEL f2 =====  
SFO2 300.1312005 MHz  
NUC2 1H  
CPDPRG[2] waltz16  
PCPD2 90.00 usec  
PLW2 14.0000000 W  
PLW12 0.1728400 W  
PLW13 0.1400000 W

F2 - Processing parameters  
SI 32768  
SF 75.4677433 MHz  
WDW EM  
SSB 0  
LB 1.00 Hz  
GB 0  
PC 1.40

200 180 160 140 120 100 80 60 40 20 0 ppm

3sjwei 5512 xh1-3-29-2 1h cdcl3

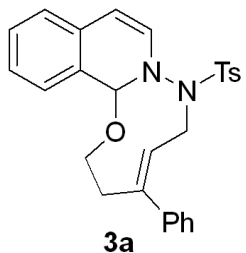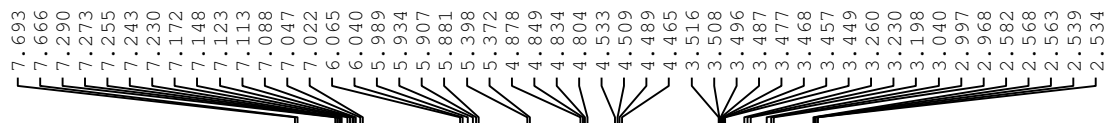

Current Data Parameters  
NAME 2021-4--11Project 1 data  
EXPNO 5512  
PROCNO 1

F2 - Acquisition Parameters  
Date\_ 20211013  
Time 9.16  
INSTRUM spect  
PROBHD 5 mm PABBO BB-  
PULPROG zg30  
TD 65536  
SOLVENT CDC13  
NS 16  
DS 2  
SWH 6009.615 Hz  
FIDRES 0.091699 Hz  
AQ 5.4525952 sec  
RG 128  
DW 83.200 usec  
DE 6.50 usec  
TE -59.1 K  
D1 1.00000000 sec  
TD0 1

==== CHANNEL f1 =====  
SFO1 300.1318534 MHz  
NUC1 1H  
P1 10.00 usec  
PLW1 14.00000000 W

F2 - Processing parameters  
SI 65536  
SF 300.1300088 MHz  
WDW EM  
SSB 0  
LB 0.30 Hz  
GB 0  
PC 1.00

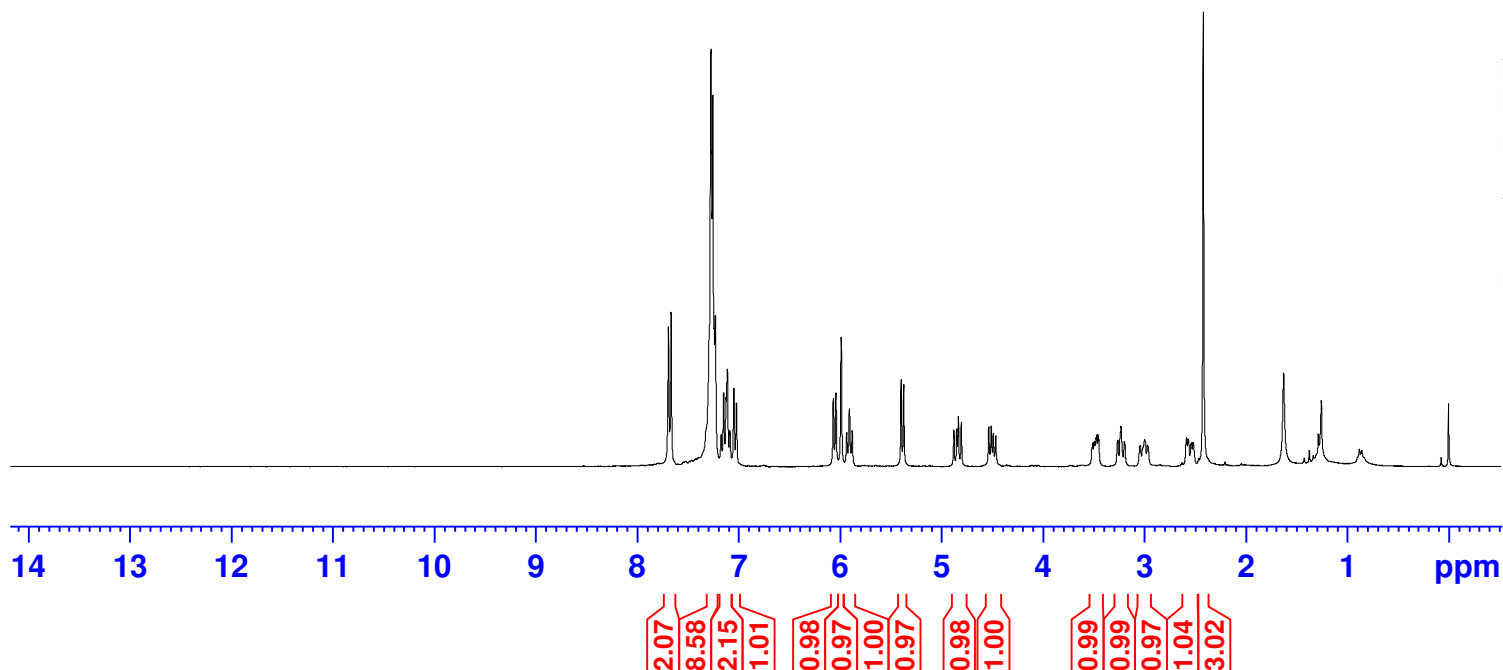

3sjwei 5523 xh1-3-29-2 13c cdcl3

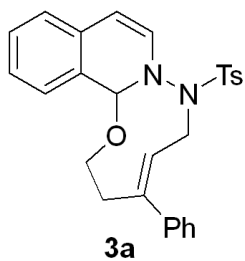

146.82  
144.43  
143.15  
135.59  
134.78  
131.89  
129.91  
128.80  
128.49  
128.29  
127.91  
127.61  
127.58  
126.49  
125.78  
124.14  
121.82

99.35

88.81

77.57  
77.15  
76.73

63.50

49.21

33.03

21.74

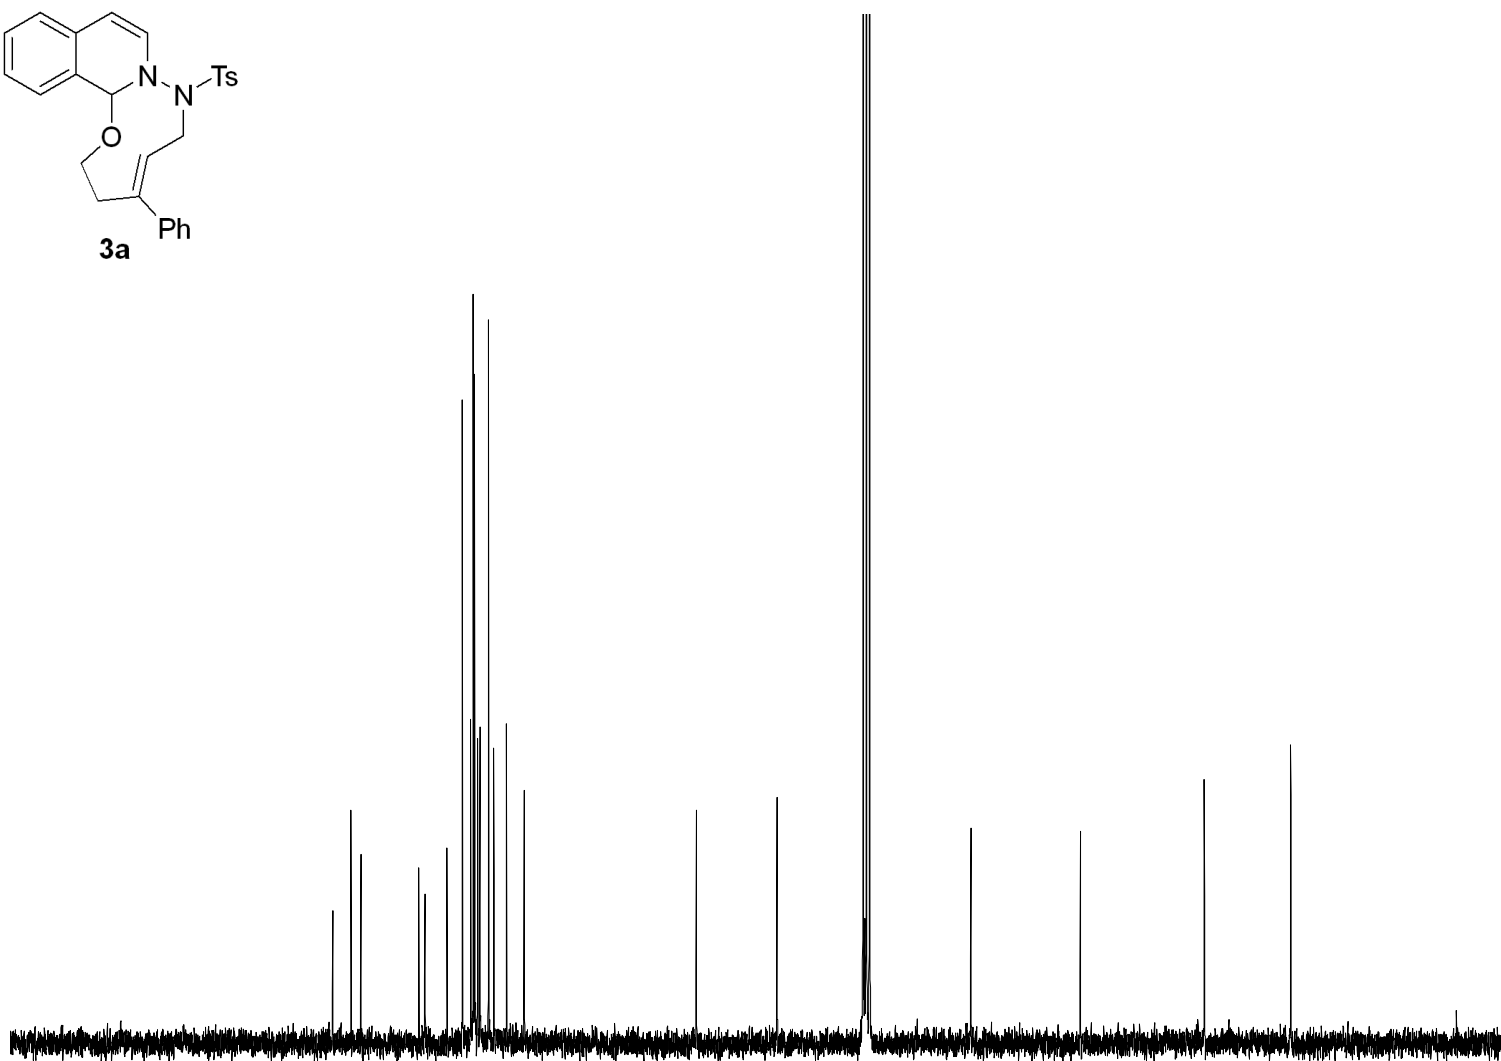

180 160 140 120 100 80 60 40 20 ppm



Current Data Parameters  
NAME 2021-4--11Project 1 data  
EXPNO 5523  
PROCNO 1

F2 - Acquisition Parameters  
Date\_ 20211013  
Time 12.42  
INSTRUM spect  
PROBHD 5 mm PABBO BB-  
PULPROG zgpg30  
TD 65536  
SOLVENT CDCl3  
NS 800  
DS 4  
SWH 18028.846 Hz  
FIDRES 0.275098 Hz  
AQ 1.8175317 sec  
RG 203  
DW 27.733 usec  
DE 6.50 usec  
TE -59.1 K  
D1 2.00000000 sec  
D11 0.03000000 sec  
TD0 1

===== CHANNEL f1 =====  
SFO1 75.4752949 MHz  
NUC1 13C  
P1 9.50 usec  
PLW1 34.20000076 W

===== CHANNEL f2 =====  
SFO2 300.1312005 MHz  
NUC2 1H  
CPDPRG[2] waltz16  
PCPD2 90.00 usec  
PLW2 14.00000000 W  
PLW12 0.17284000 W  
PLW13 0.14000000 W

F2 - Processing parameters  
SI 32768  
SF 75.4677420 MHz  
WDW EM  
SSB 0  
LB 1.00 Hz  
GB 0  
PC 1.40

3sjwei 5274 xh1-2-83 1h cdcl3

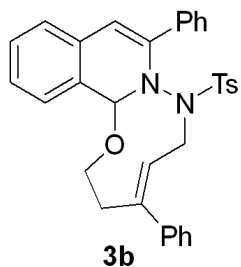

7.417  
7.408  
7.401  
7.376  
7.366  
7.361  
7.341  
7.336  
7.316  
7.311  
7.280  
7.239  
7.232  
7.210  
7.207  
7.196  
7.190  
7.184  
7.178  
7.167  
7.159  
7.132  
7.108  
7.084  
7.024  
7.002  
6.996  
6.350  
6.328  
6.315  
6.293  
6.186  
5.698  
4.791  
4.770  
4.745  
4.721  
4.685  
4.673  
4.638  
3.812  
3.806  
3.795  
3.787  
3.771  
3.764  
3.753  
3.746  
3.645  
3.614  
3.607  
3.573  
3.215  
3.188  
3.171  
3.166

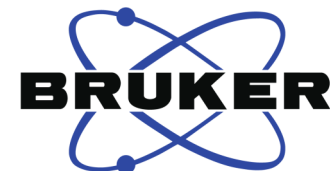

Current Data Parameters  
NAME 2021-4--11Project 1 data  
EXPNO 5274  
PROCNO 1

F2 - Acquisition Parameters  
Date\_ 20210909  
Time 9.13  
INSTRUM spect  
PROBHD 5 mm PABBO BB-  
PULPROG zg30  
TD 65536  
SOLVENT CDC13  
NS 16  
DS 2  
SWH 6009.615 Hz  
FIDRES 0.091699 Hz  
AQ 5.4525952 sec  
RG 181  
DW 83.200 usec  
DE 6.50 usec  
TE -59.1 K  
D1 1.00000000 sec  
TD0 1

==== CHANNEL f1 =====  
SFO1 300.1318534 MHz  
NUC1 1H  
P1 10.00 usec  
PLW1 14.00000000 W

F2 - Processing parameters  
SI 65536  
SF 300.1300087 MHz  
WDW EM  
SSB 0  
LB 0.30 Hz  
GB 0  
PC 1.00

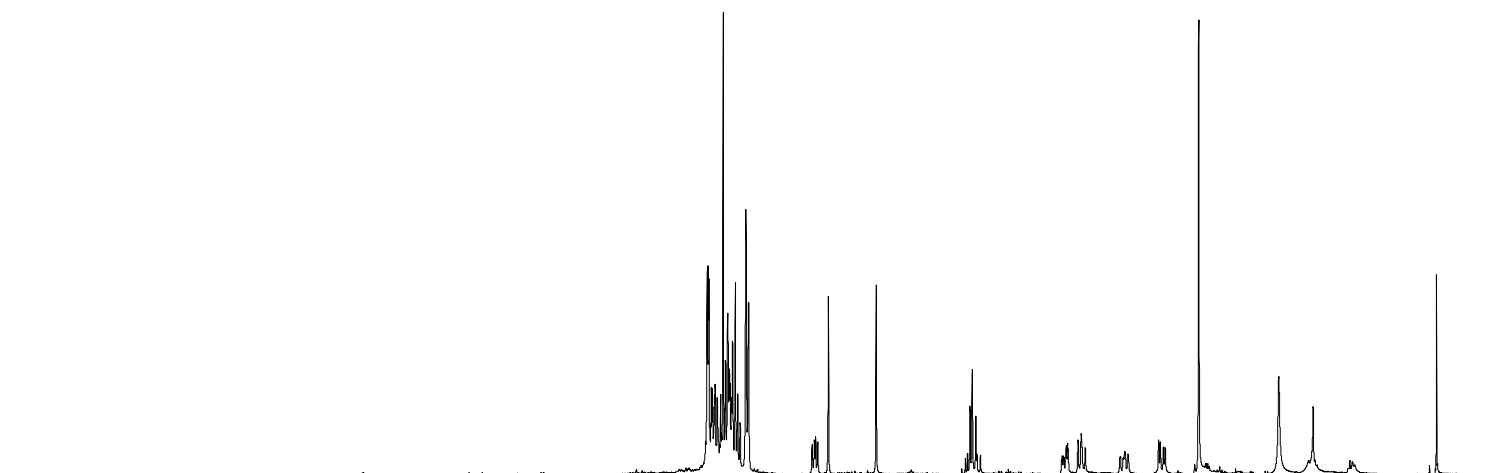

14 13 12 11 10 9 8 7 6 5 4 3 2 1 ppm

8.00  
8.47  
4.27  
1.00  
0.99  
1.02  
2.09  
1.01  
1.19  
1.02  
1.12  
3.30

3sjwei 5287 xh1-2-83 13c cdcl3

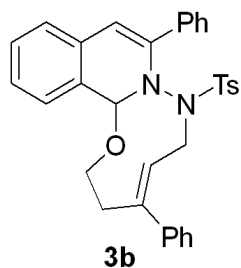

144.06  
143.98  
143.23  
142.73  
136.07  
135.05  
130.48  
129.39  
128.94  
128.81  
128.73  
128.68  
128.60  
128.07  
127.95  
127.53  
127.10  
125.91  
125.50  
124.88  
124.18  
104.79

90.35

77.57  
77.15  
76.72

63.85

52.46

33.66

21.74

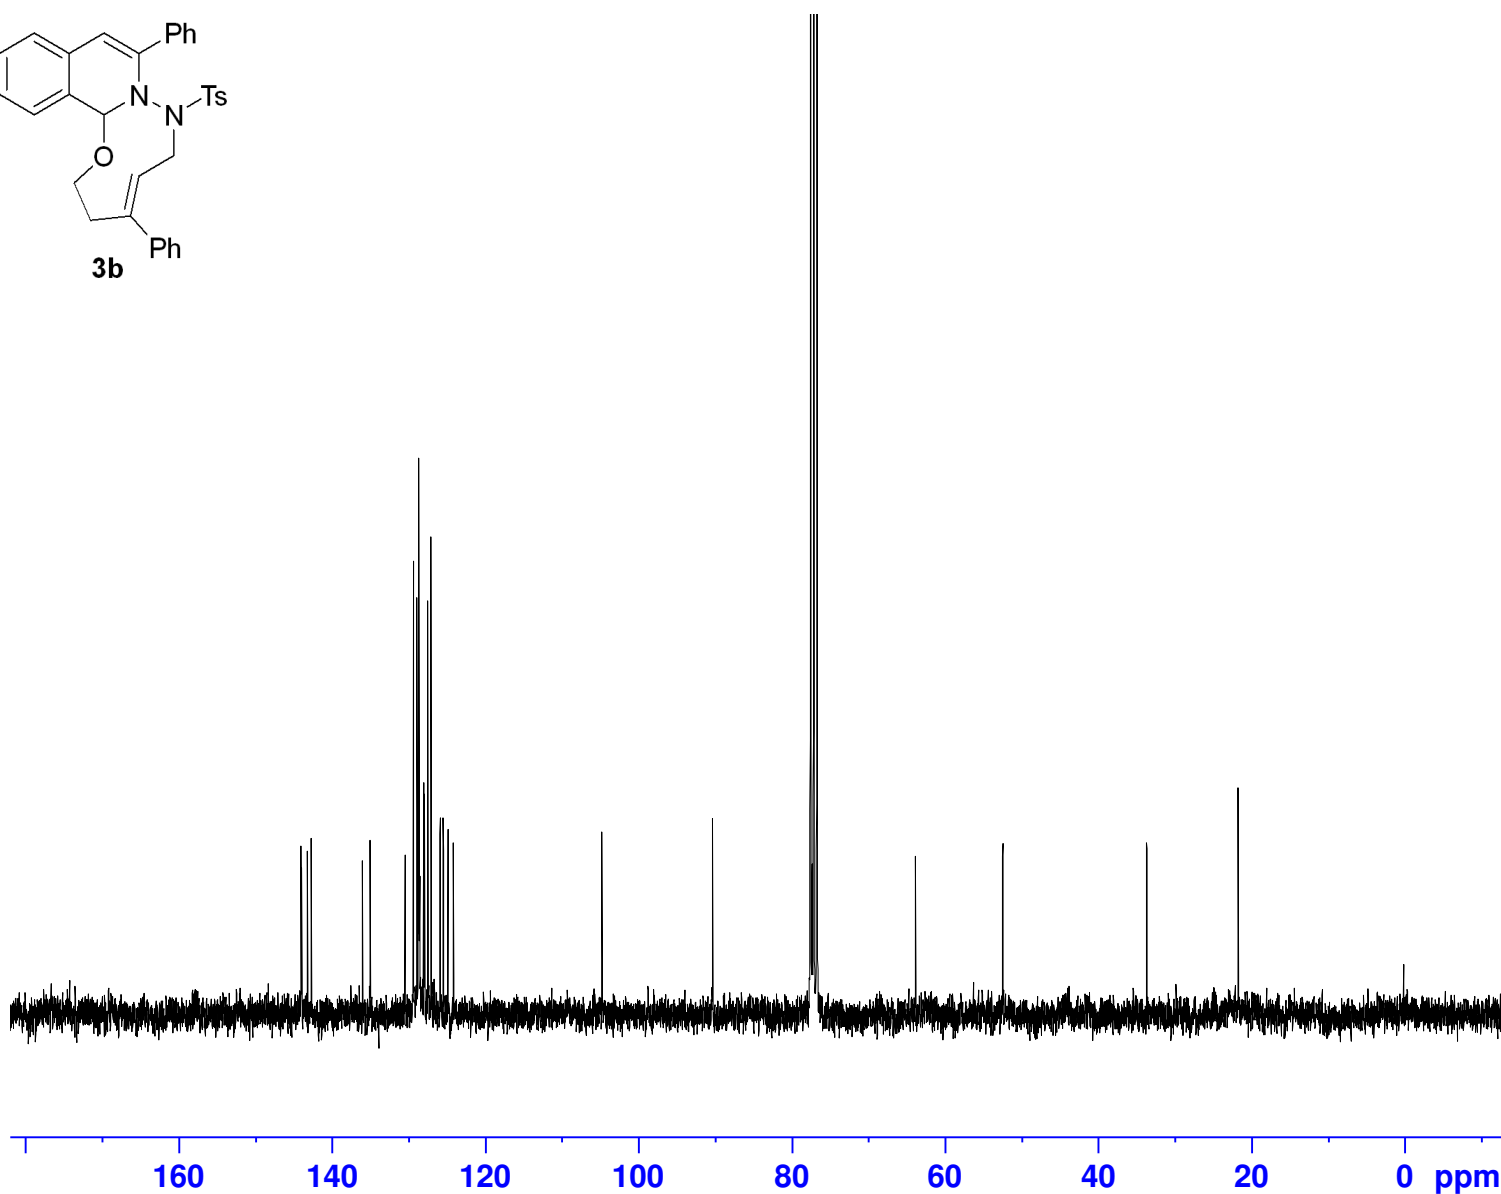

Current Data Parameters  
NAME 2021-4--11Project 1 data  
EXPNO 5287  
PROCNO 1

F2 - Acquisition Parameters  
Date\_ 20210909  
Time 11.41  
INSTRUM spect  
PROBHD 5 mm PABBO BB-  
PULPROG zgpg30  
TD 65536  
SOLVENT CDC13  
NS 1024  
DS 4  
SWH 18028.846 Hz  
FIDRES 0.275098 Hz  
AQ 1.8175317 sec  
RG 203  
DW 27.733 usec  
DE 6.50 usec  
TE -59.1 K  
D1 2.0000000 sec  
D11 0.0300000 sec  
TD0 1

===== CHANNEL f1 =====  
SFO1 75.4752949 MHz  
NUC1 13C  
P1 9.50 usec  
PLW1 34.20000076 W

===== CHANNEL f2 =====  
SFO2 300.1312005 MHz  
NUC2 1H  
CPDPRG[2] waltz16  
PCPD2 90.00 usec  
PLW2 14.00000000 W  
PLW12 0.17284000 W  
PLW13 0.14000000 W

F2 - Processing parameters  
SI 32768  
SF 75.4677406 MHz  
WDW EM  
SSB 0  
LB 1.00 Hz  
GB 0  
PC 1.40

3sjwei 5358 xhl-1-84 1h cdcl3

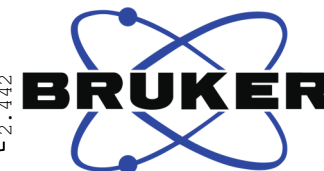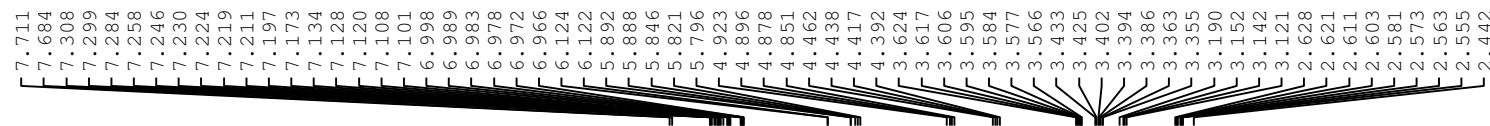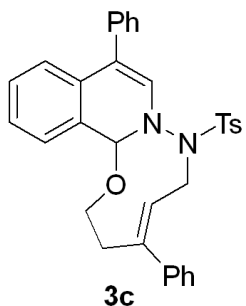

Current Data Parameters  
NAME 2021-4--11Project 1 data  
EXPNO 5358  
PROCNO 1

F2 - Acquisition Parameters  
Date\_ 20210917  
Time 9.16  
INSTRUM spect  
PROBHD 5 mm PABBO BB-  
PULPROG zg30  
TD 65536  
SOLVENT CDC13  
NS 16  
DS 2  
SWH 6009.615 Hz  
FIDRES 0.091699 Hz  
AQ 5.4525952 sec  
RG 71.8  
DW 83.200 usec  
DE 6.50 usec  
TE -59.1 K  
D1 1.00000000 sec  
TD0 1

==== CHANNEL f1 =====  
SFO1 300.1318534 MHz  
NUC1 1H  
P1 10.00 usec  
PLW1 14.00000000 W

F2 - Processing parameters  
SI 65536  
SF 300.1300152 MHz  
WDW EM  
SSB 0  
LB 0.30 Hz  
GB 0  
PC 1.00

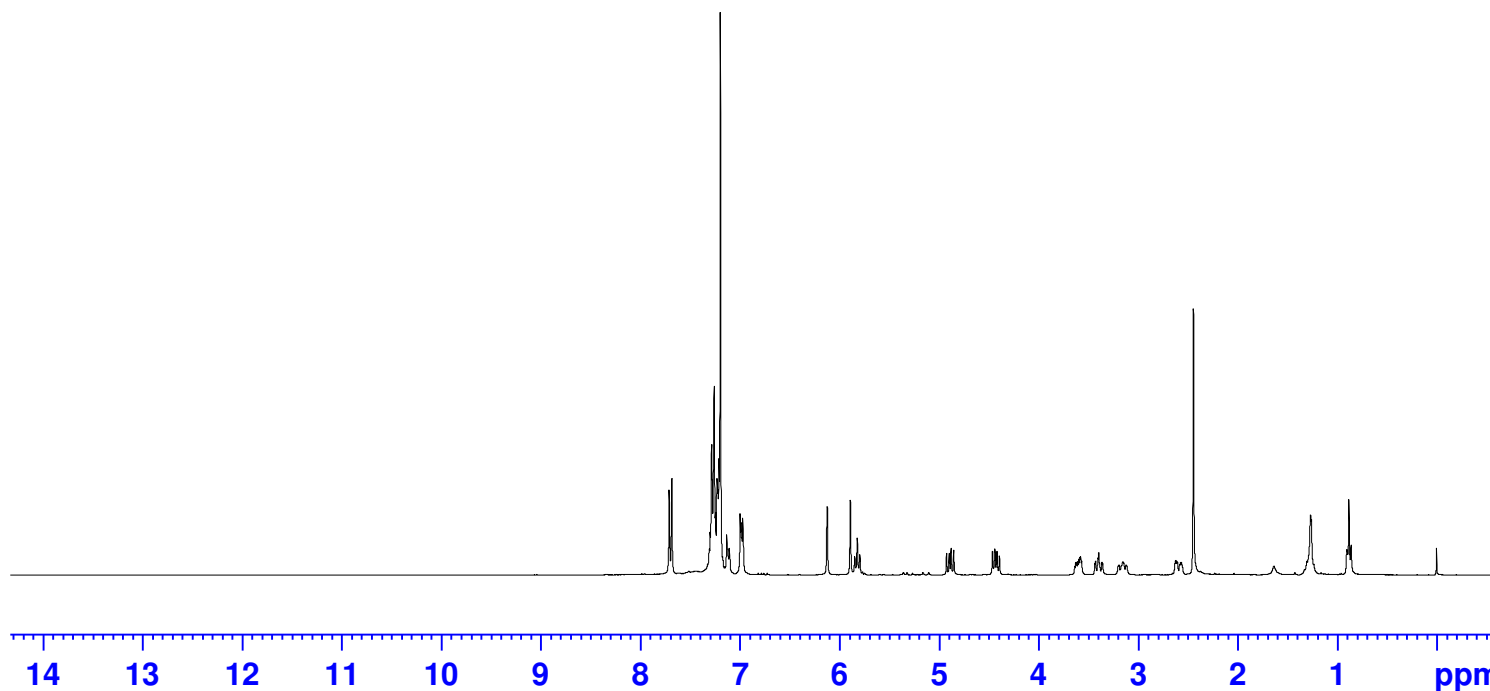

2.07  
13.69  
1.18  
2.03  
0.98  
0.97  
1.00  
0.97  
1.11  
1.06  
1.00  
0.99  
0.99  
3.03



3sjwei 5379 xh1-1-84 13c cdcl3

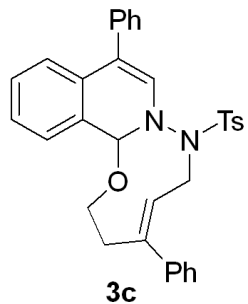

146.64  
144.54  
142.74  
137.24  
135.12  
132.61  
131.63  
129.93  
129.53  
128.64  
128.58  
128.41  
128.39  
128.26  
128.21  
127.57  
126.78  
126.63  
126.28  
122.87  
121.39  
113.46

89.56

77.57  
77.15  
76.73

64.06

48.86

33.08

21.68

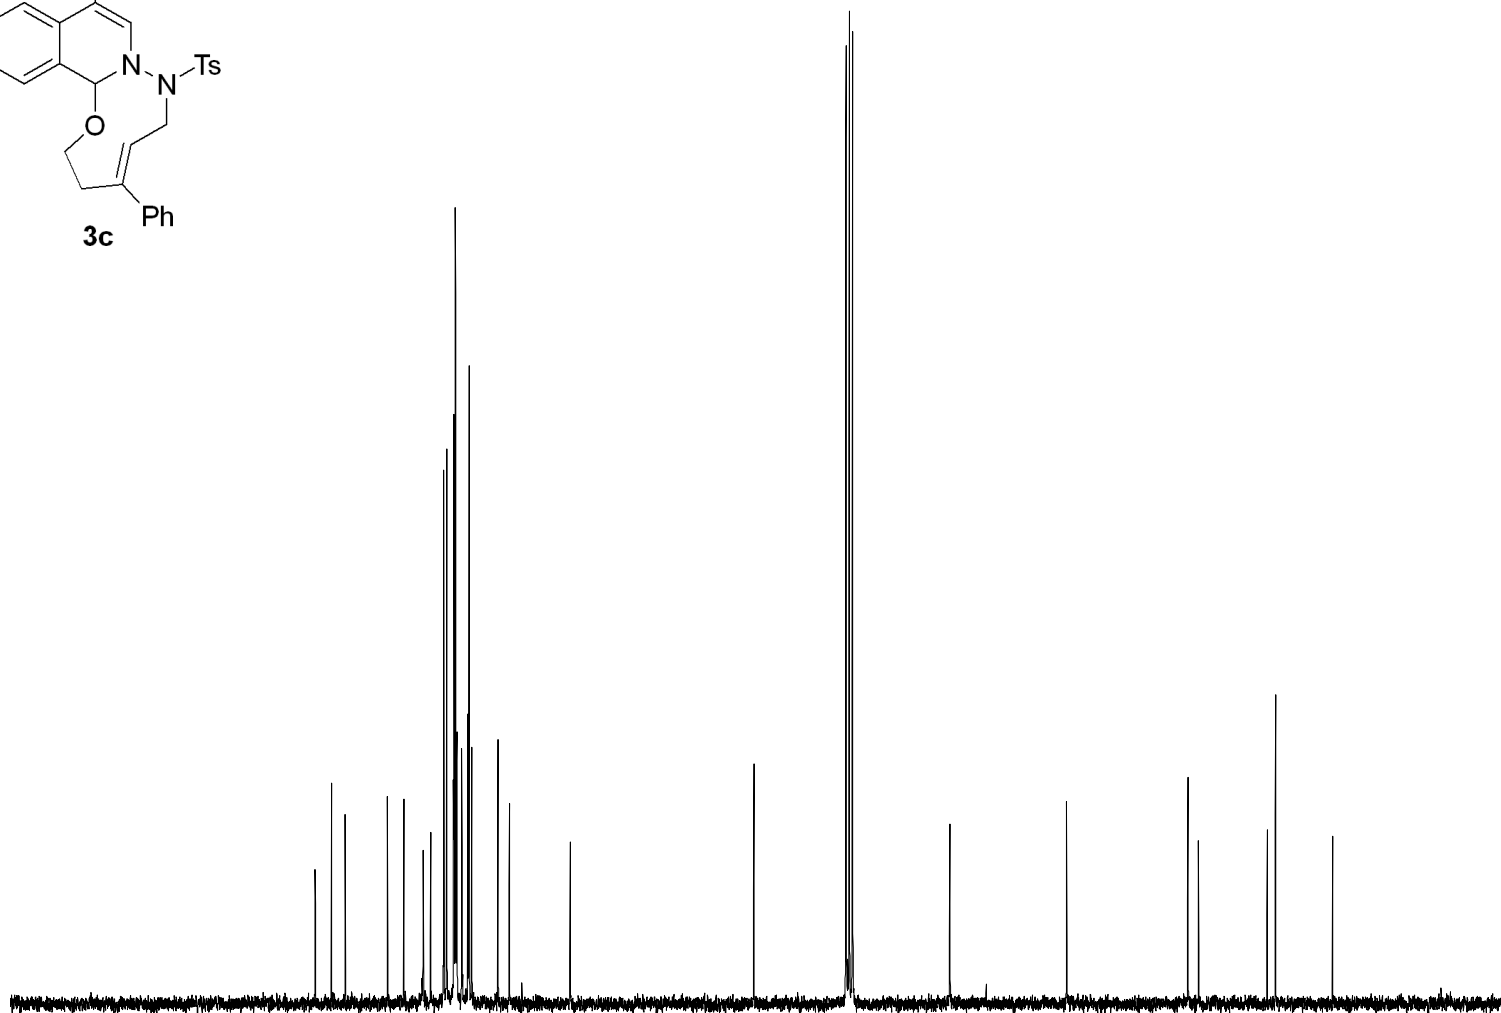

Current Data Parameters  
NAME 2021-4--11Project 1 data  
EXPNO 5379  
PROCNO 1

F2 - Acquisition Parameters  
Date\_ 20210917  
Time 12.35  
INSTRUM spect  
PROBHD 5 mm PABBO BB-  
PULPROG zgpg30  
TD 65536  
SOLVENT CDCl3  
NS 700  
DS 4  
SWH 18028.846 Hz  
FIDRES 0.275098 Hz  
AQ 1.8175317 sec  
RG 203  
DW 27.733 usec  
DE 6.50 usec  
TE -59.1 K  
D1 2.00000000 sec  
D11 0.03000000 sec  
TD0 1

===== CHANNEL f1 =====  
SFO1 75.4752949 MHz  
NUC1 13C  
P1 9.50 usec  
PLW1 34.20000076 W

===== CHANNEL f2 =====  
SFO2 300.1312005 MHz  
NUC2 1H  
CPDPRG[2] waltz16  
PCPD2 90.00 usec  
PLW2 14.00000000 W  
PLW12 0.17284000 W  
PLW13 0.14000000 W

F2 - Processing parameters  
SI 32768  
SF 75.4677448 MHz  
WDW EM  
SSB 0  
LB 1.00 Hz  
GB 0  
PC 1.40

180 160 140 120 100 80 60 40 20 ppm

3sjwei 5345 xh1-1-83 1h cdcl3

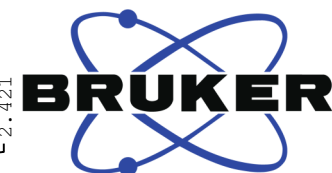

7.696  
7.669  
7.433  
7.427  
7.422  
7.402  
7.399  
7.381  
7.354  
7.348  
7.335  
7.332  
7.328  
7.323  
7.289  
7.276  
7.267  
7.255  
7.234  
7.228  
7.204  
7.179  
7.120  
7.114  
7.097  
7.090  
5.998  
5.988  
5.984  
5.962  
5.957  
5.918  
5.892  
5.866  
5.478  
5.452  
4.885  
4.858  
4.840  
4.813  
4.463  
4.438  
4.418  
4.393  
3.594  
3.585  
3.575  
3.564  
3.554  
3.545  
3.535  
3.396  
3.388  
3.367  
3.358  
3.348  
3.327  
3.080  
3.071  
2.644  
2.636  
2.625  
2.616  
2.587  
2.576  
2.421

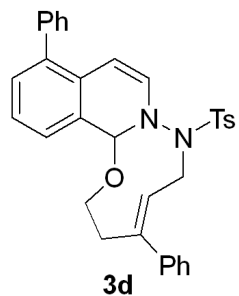

Current Data Parameters  
NAME 2021-4--11Project 1 data  
EXPNO 5345  
PROCNO 1

F2 - Acquisition Parameters  
Date\_ 20210916  
Time 9.13  
INSTRUM spect  
PROBHD 5 mm PABBO BB-  
PULPROG zg30  
TD 65536  
SOLVENT CDC13  
NS 16  
DS 2  
SWH 6009.615 Hz  
FIDRES 0.091699 Hz  
AQ 5.4525952 sec  
RG 181  
DW 83.200 usec  
DE 6.50 usec  
TE -59.1 K  
D1 1.00000000 sec  
TD0 1

==== CHANNEL f1 =====  
SFO1 300.1318534 MHz  
NUC1 1H  
P1 10.00 usec  
PLW1 14.00000000 W

F2 - Processing parameters  
SI 65536  
SF 300.1300087 MHz  
WDW EM  
SSB 0  
LB 0.30 Hz  
GB 0  
PC 1.00

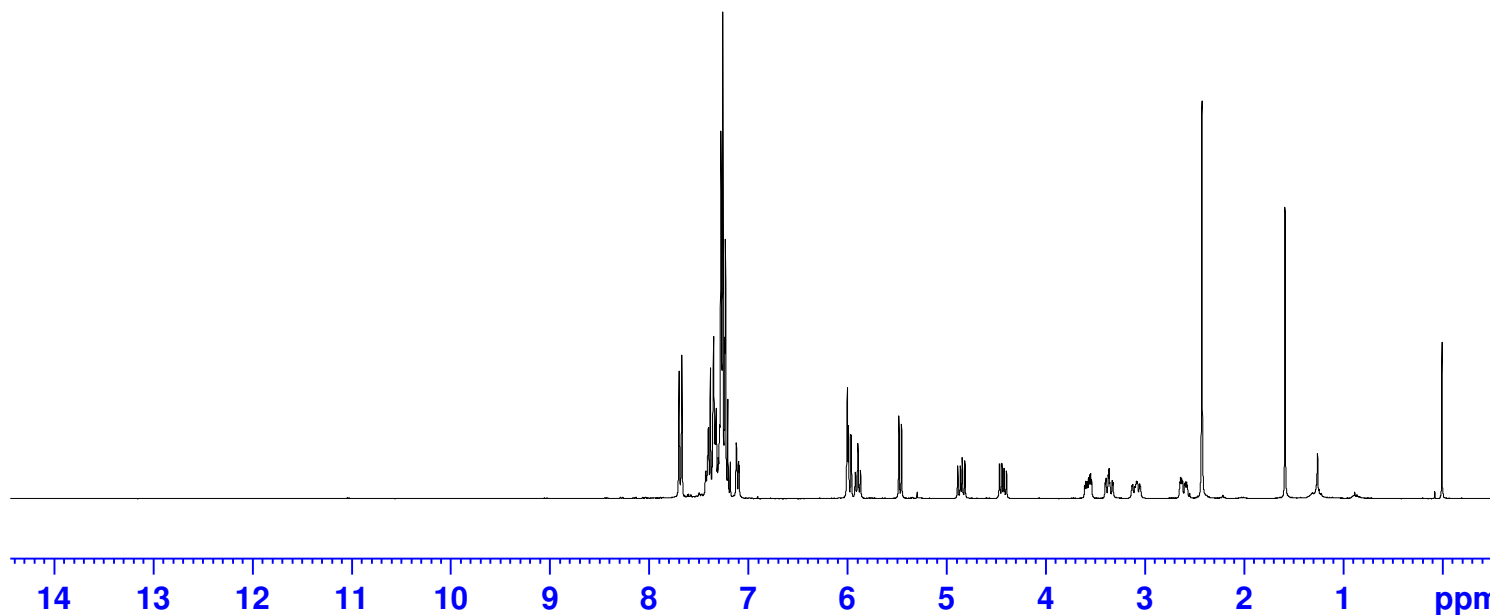

2.06  
5.65  
10.59  
1.03  
0.94  
1.05  
1.00  
1.00  
1.01  
1.01  
1.02  
1.04  
1.00  
1.02  
3.11

3sjwei 5365 xh1-1-83 13c cdcl3

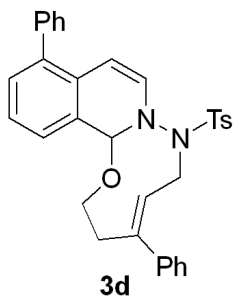

146.44  
144.50  
143.01  
140.57  
136.97  
135.32  
134.01  
130.19  
129.90  
129.17  
128.51  
128.42  
128.24  
127.64  
127.15  
127.09  
126.57  
125.66  
121.69

97.77

89.47

77.57  
77.15  
76.73

64.04

49.08

33.07

21.76

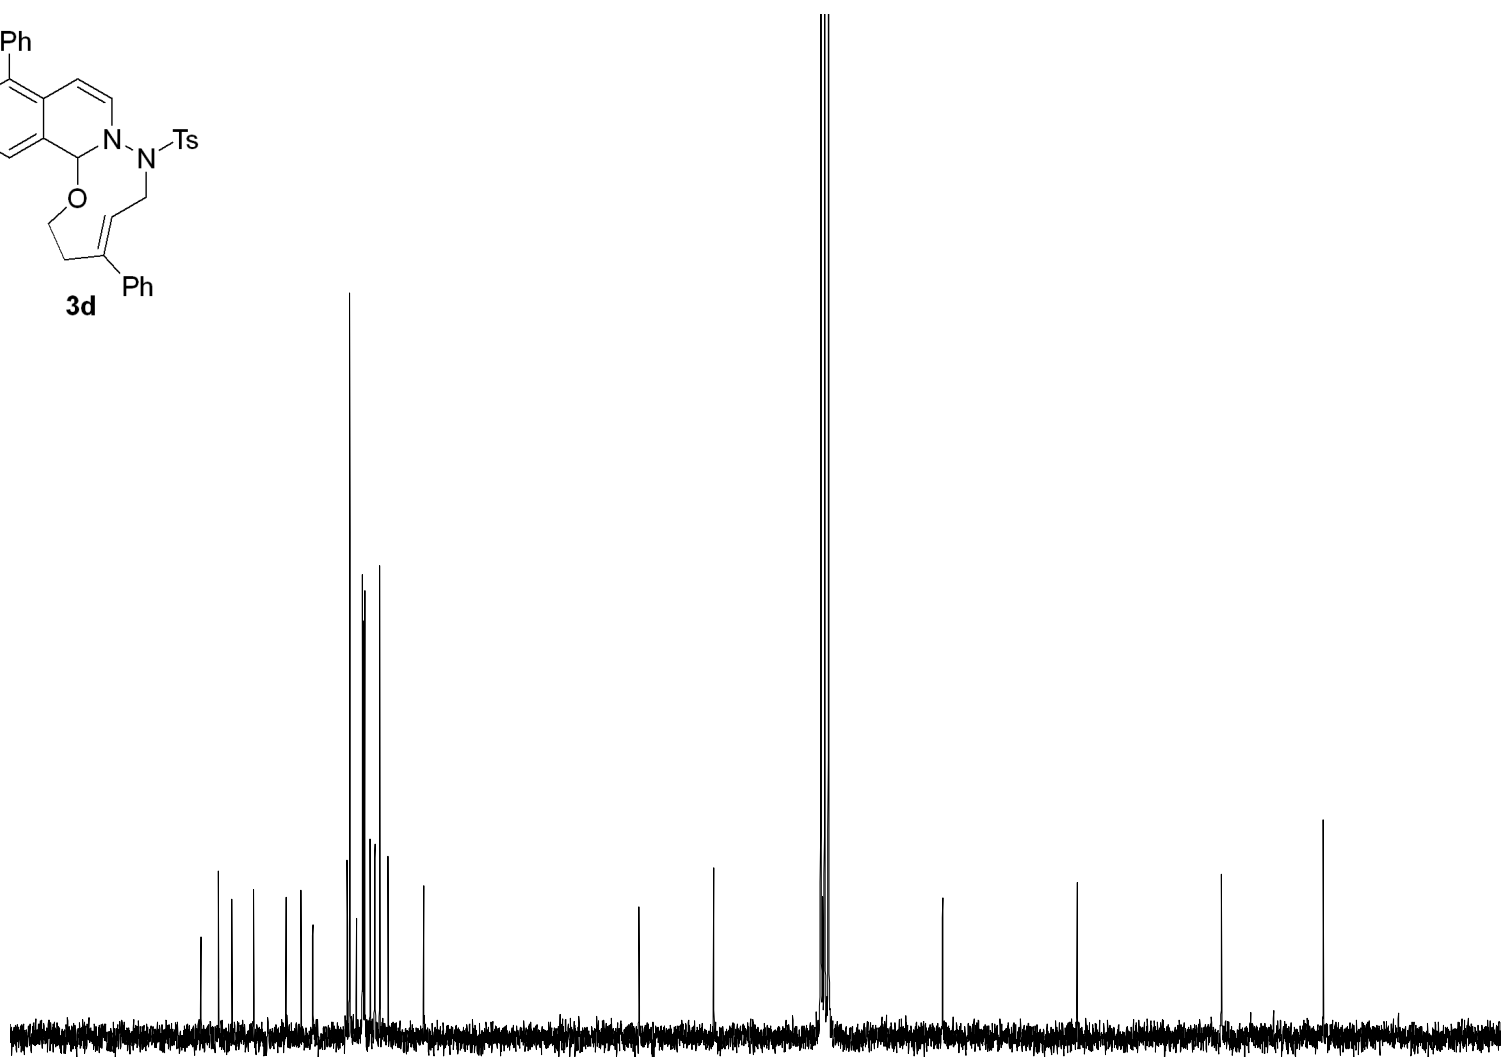

Current Data Parameters  
NAME 2021-4--11Project 1 data  
EXPNO 5365  
PROCNO 1

F2 - Acquisition Parameters  
Date\_ 20210916  
Time 11.58  
INSTRUM spect  
PROBHD 5 mm PABBO BB-  
PULPROG zgpg30  
TD 65536  
SOLVENT CDCl3  
NS 1024  
DS 4  
SWH 18028.846 Hz  
FIDRES 0.275098 Hz  
AQ 1.8175317 sec  
RG 203  
DW 27.733 usec  
DE 6.50 usec  
TE -59.1 K  
D1 2.00000000 sec  
D11 0.03000000 sec  
TD0 1

===== CHANNEL f1 =====  
SFO1 75.4752949 MHz  
NUC1 13C  
P1 9.50 usec  
PLW1 34.20000076 W

===== CHANNEL f2 =====  
SFO2 300.1312005 MHz  
NUC2 1H  
CPDPRG[2] waltz16  
PCPD2 90.00 usec  
PLW2 14.00000000 W  
PLW12 0.17284000 W  
PLW13 0.14000000 W

F2 - Processing parameters  
SI 32768  
SF 75.4677405 MHz  
WDW EM  
SSB 0  
LB 1.00 Hz  
GB 0  
PC 1.40

160 150 140 130 120 110 100 90 80 70 60 50 40 30 20 ppm

3sjwei 5326 xh1-1-74 1h cdcl3

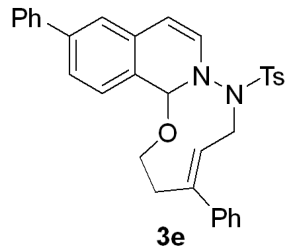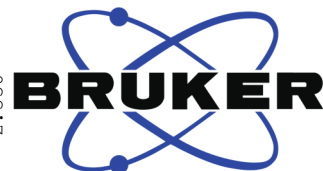

7.715  
7.688  
7.591  
7.566  
7.453  
7.429  
7.403  
7.395  
7.389  
7.364  
7.341  
7.282  
7.271  
7.247  
7.196  
7.169  
6.090  
6.064  
6.041  
5.936  
5.909  
5.883  
5.460  
5.434  
4.897  
4.868  
4.852  
4.823  
4.534  
4.510  
4.490  
4.466  
3.572  
3.563  
3.552  
3.543  
3.532  
3.523  
3.512  
3.504  
3.322  
3.299  
3.292  
3.259  
3.079  
3.036  
3.008  
2.599  
2.586  
2.580  
2.556  
2.550

Current Data Parameters  
NAME 2021-4--11Project 1 data  
EXPNO 5326  
PROCNO 1

F2 - Acquisition Parameters  
Date\_ 20210915  
Time 9.05  
INSTRUM spect  
PROBHD 5 mm PABBO BB-  
PULPROG zg30  
TD 65536  
SOLVENT CDC13  
NS 16  
DS 2  
SWH 6009.615 Hz  
FIDRES 0.091699 Hz  
AQ 5.4525952 sec  
RG 144  
DW 83.200 usec  
DE 6.50 usec  
TE -59.1 K  
D1 1.00000000 sec  
TD0 1

==== CHANNEL f1 =====  
SFO1 300.1318534 MHz  
NUC1 1H  
P1 10.00 usec  
PLW1 14.00000000 W

F2 - Processing parameters  
SI 65536  
SF 300.1300108 MHz  
WDW EM  
SSB 0  
LB 0.30 Hz  
GB 0  
PC 1.00

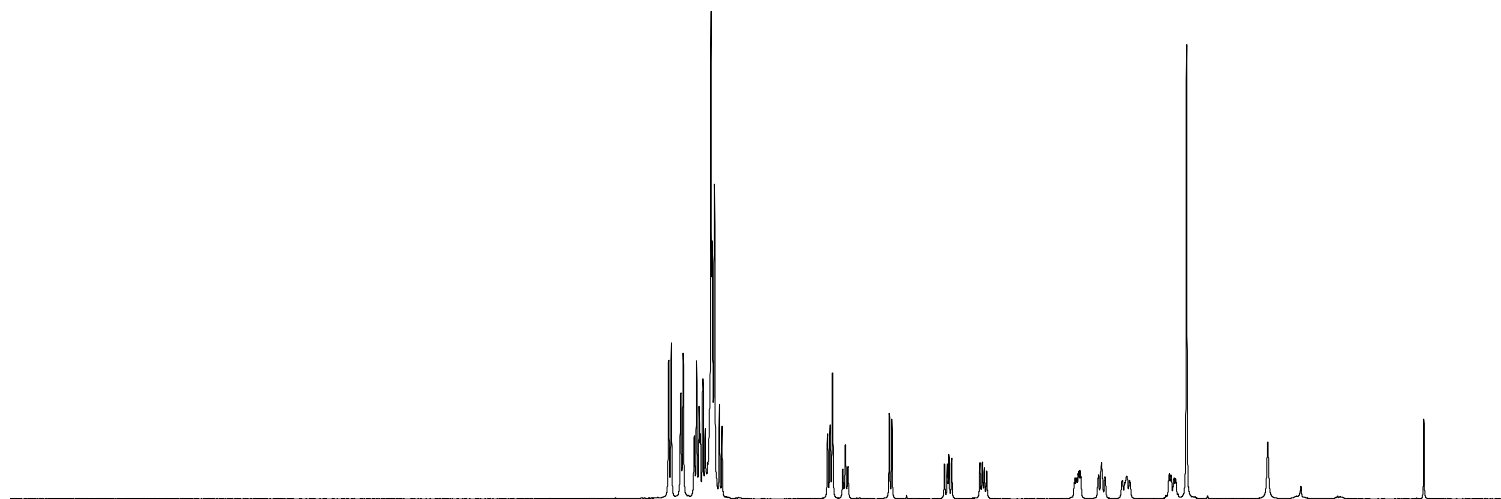

14 13 12 11 10 9 8 7 6 5 4 3 2 1 ppm

2.04  
2.06  
4.25  
8.44  
1.02  
2.03  
1.00  
0.99  
1.00  
0.99  
1.01  
1.02  
1.00  
1.03  
3.03

3sjwei 5344 xh1-1-74 13c cdcl3

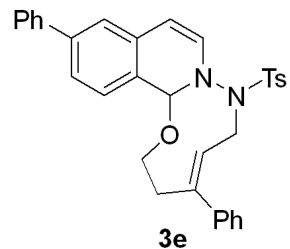

146.90  
144.46  
143.12  
141.73  
140.89  
135.55  
135.05  
132.25  
129.95  
128.86  
128.50  
128.34  
127.63  
127.56  
127.25  
126.61  
126.51  
124.74  
122.75  
121.73

99.41  
88.79  
77.57  
77.15  
76.72  
63.68  
49.20  
33.06  
21.76

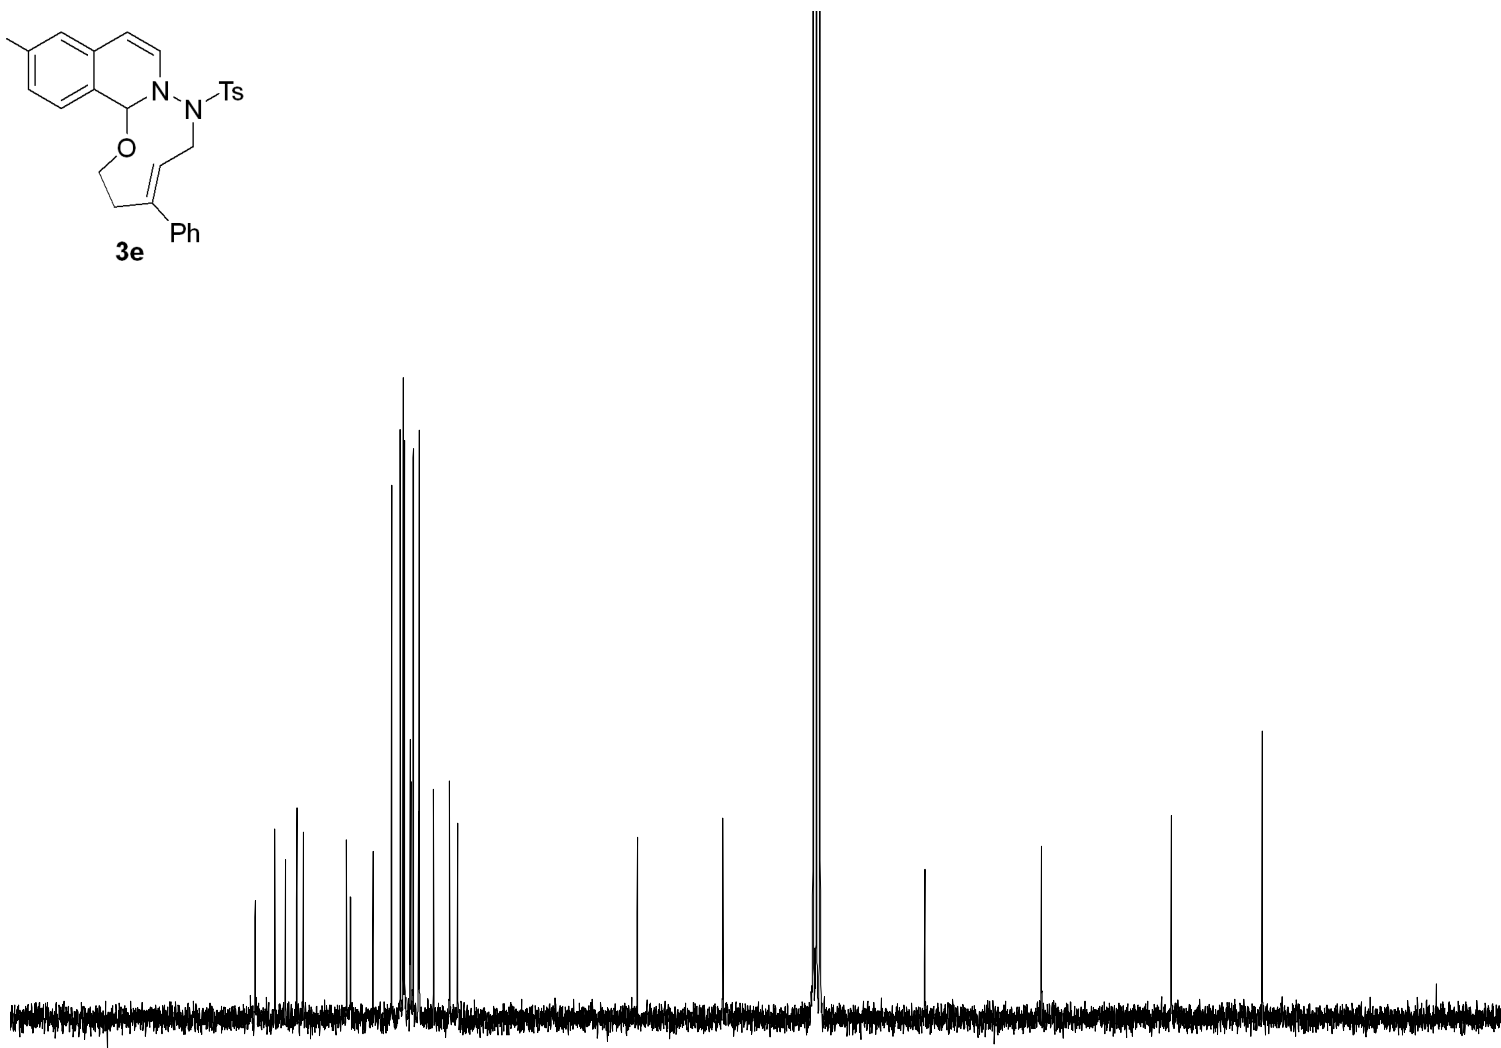

Current Data Parameters  
NAME 2021-4--11Project 1 data  
EXPNO 5344  
PROCNO 1

F2 - Acquisition Parameters  
Date\_ 20210915  
Time 14.21  
INSTRUM spect  
PROBHD 5 mm PABBO BB-  
PULPROG zgpg30  
TD 65536  
SOLVENT CDCl3  
NS 600  
DS 4  
SWH 18028.846 Hz  
FIDRES 0.275098 Hz  
AQ 1.8175317 sec  
RG 203  
DW 27.733 usec  
DE 6.50 usec  
TE -59.1 K  
D1 2.00000000 sec  
D11 0.03000000 sec  
TD0 1

===== CHANNEL f1 =====  
SFO1 75.4752949 MHz  
NUC1 13C  
P1 9.50 usec  
PLW1 34.20000076 W

===== CHANNEL f2 =====  
SFO2 300.1312005 MHz  
NUC2 1H  
CPDPRG[2] waltz16  
PCPD2 90.00 usec  
PLW2 14.00000000 W  
PLW12 0.17284000 W  
PLW13 0.14000000 W

F2 - Processing parameters  
SI 32768  
SF 75.4677421 MHz  
WDW EM  
SSB 0  
LB 1.00 Hz  
GB 0  
PC 1.40

170 160 150 140 130 120 110 100 90 80 70 60 50 40 30 20 10 ppm

3sjwei 5316 xh1-2-20 1h cdcl3

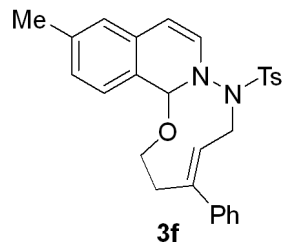

7.695  
7.668  
7.287  
7.272  
7.267  
7.255  
7.238  
7.230  
7.017  
6.991  
6.976  
6.947  
6.843  
6.046  
6.020  
5.968  
5.927  
5.901  
5.874  
5.335  
5.309  
4.872  
4.842  
4.828  
4.798  
4.551  
4.527  
4.507  
4.483  
3.494  
3.486  
3.474  
3.465  
3.455  
3.446  
3.434  
3.426  
3.240  
3.217  
3.210  
3.177  
3.172  
3.013  
2.969  
2.940  
2.562  
2.548

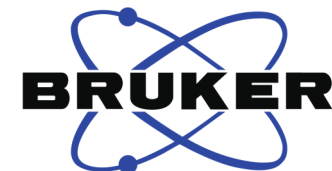

Current Data Parameters  
NAME 2021-4--11Project 1 data  
EXPNO 5316  
PROCNO 1

F2 - Acquisition Parameters  
Date\_ 20210914  
Time 8.56  
INSTRUM spect  
PROBHD 5 mm PABBO BB-  
PULPROG zg30  
TD 65536  
SOLVENT CDC13  
NS 16  
DS 2  
SWH 6009.615 Hz  
FIDRES 0.091699 Hz  
AQ 5.4525952 sec  
RG 161  
DW 83.200 usec  
DE 6.50 usec  
TE -59.1 K  
D1 1.00000000 sec  
TD0 1

==== CHANNEL f1 =====  
SFO1 300.1318534 MHz  
NUC1 1H  
P1 10.00 usec  
PLW1 14.00000000 W

F2 - Processing parameters  
SI 65536  
SF 300.1300088 MHz  
WDW EM  
SSB 0  
LB 0.30 Hz  
GB 0  
PC 1.00

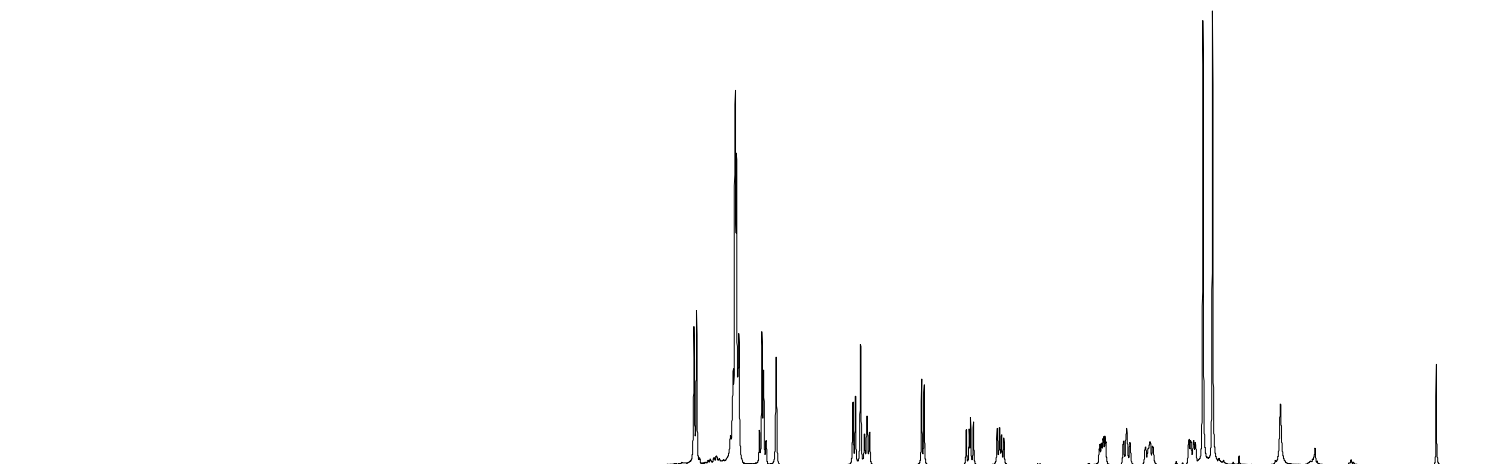

14 13 12 11 10 9 8 7 6 5 4 3 2 1 ppm

2.23  
7.92  
2.03  
0.99  
0.98  
0.95  
1.00  
0.98  
0.98  
1.00  
1.01  
1.00  
0.99  
1.04  
3.12  
3.17

3sjwei 5328 xh1-2-20 13c cdcl3

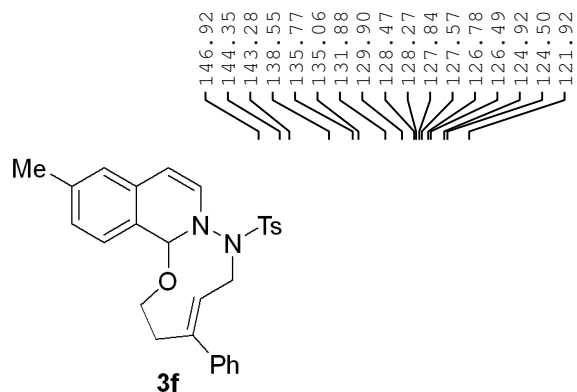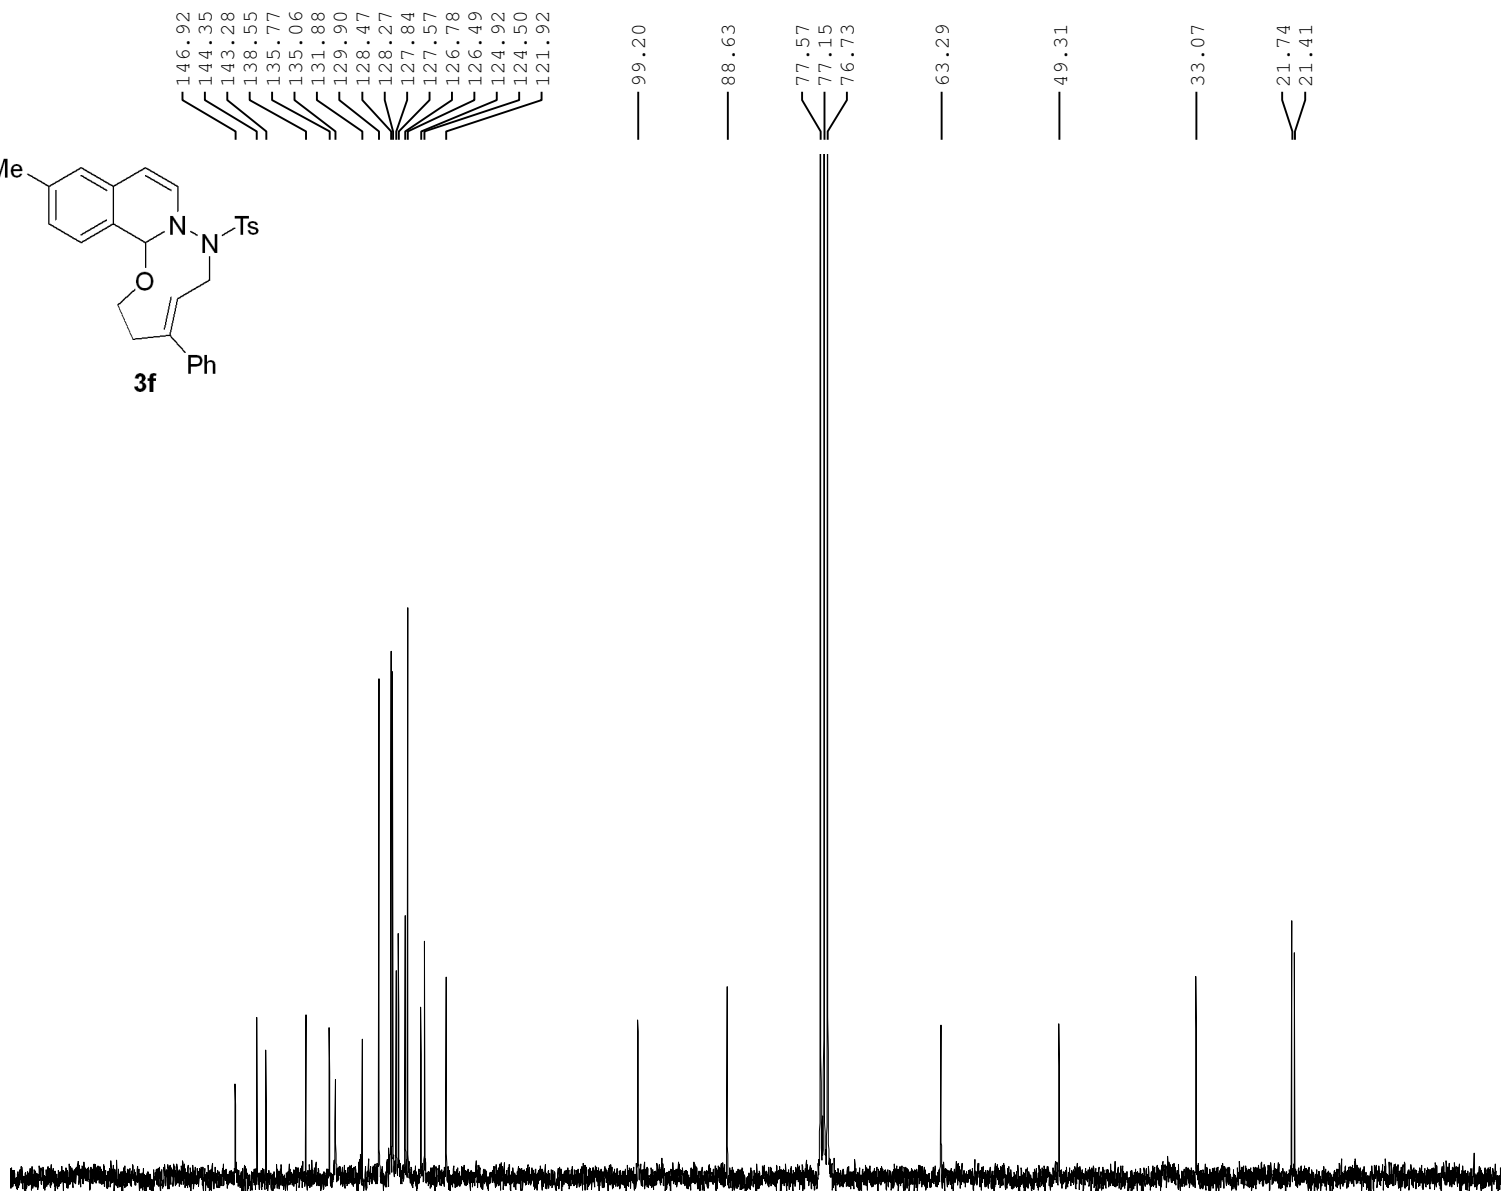

Current Data Parameters  
NAME 2021-4--11Project 1 data  
EXPNO 5328  
PROCNO 1

F2 - Acquisition Parameters  
Date\_ 20210914  
Time 10.59  
INSTRUM spect  
PROBHD 5 mm PABBO BB-  
PULPROG zgpg30  
TD 65536  
SOLVENT CDC13  
NS 1024  
DS 4  
SWH 18028.846 Hz  
FIDRES 0.275098 Hz  
AQ 1.8175317 sec  
RG 203  
DW 27.733 usec  
DE 6.50 usec  
TE -59.1 K  
D1 2.00000000 sec  
D11 0.03000000 sec  
TD0 1

===== CHANNEL f1 =====  
SFO1 75.4752949 MHz  
NUC1 13C  
P1 9.50 usec  
PLW1 34.20000076 W

===== CHANNEL f2 =====  
SFO2 300.1312005 MHz  
NUC2 1H  
CPDPRG[2] waltz16  
PCPD2 90.00 usec  
PLW2 14.00000000 W  
PLW12 0.17284000 W  
PLW13 0.14000000 W

F2 - Processing parameters  
SI 32768  
SF 75.4677414 MHz  
WDW EM  
SSB 0  
LB 1.00 Hz  
GB 0  
PC 1.40

170 160 150 140 130 120 110 100 90 80 70 60 50 40 30 20 10 ppm

3sjwei 5222 xh1-2-76 1h cdcl3

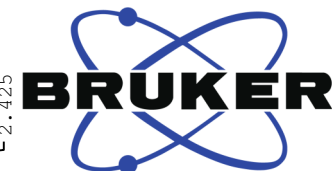

7.686  
7.659  
7.298  
7.280  
7.269  
7.257  
7.243  
7.103  
7.084  
7.074  
7.056  
6.872  
6.863  
6.843  
6.835  
6.815  
6.806  
6.728  
6.720  
6.696  
6.688  
6.083  
6.058  
5.984  
5.913  
5.887  
5.860  
5.338  
5.312  
4.870  
4.841  
4.826  
4.797  
4.511  
4.487  
4.466  
4.443  
3.529  
3.520  
3.509  
3.500  
3.489  
3.480  
3.469  
3.460  
3.260  
3.252  
3.230  
3.222  
3.213  
3.190  
3.183  
3.066  
3.058  
3.018  
3.010  
2.988  
2.588  
2.581  
2.568  
2.561  
2.540  
2.532  
2.520  
2.512  
2.425

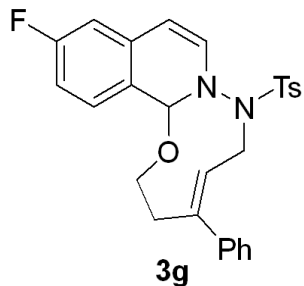

Current Data Parameters  
NAME 2021-4--11Project 1 data  
EXPNO 5222  
PROCNO 1

F2 - Acquisition Parameters  
Date\_ 20210906  
Time 9.07  
INSTRUM spect  
PROBHD 5 mm PABBO BB-  
PULPROG zg30  
TD 65536  
SOLVENT CDC13  
NS 16  
DS 2  
SWH 6009.615 Hz  
FIDRES 0.091699 Hz  
AQ 5.4525952 sec  
RG 161  
DW 83.200 usec  
DE 6.50 usec  
TE -59.1 K  
D1 1.00000000 sec  
TD0 1

==== CHANNEL f1 =====  
SFO1 300.1318534 MHz  
NUC1 1H  
P1 10.00 usec  
PLW1 14.00000000 W

F2 - Processing parameters  
SI 65536  
SF 300.1300082 MHz  
WDW EM  
SSB 0  
LB 0.30 Hz  
GB 0  
PC 1.00

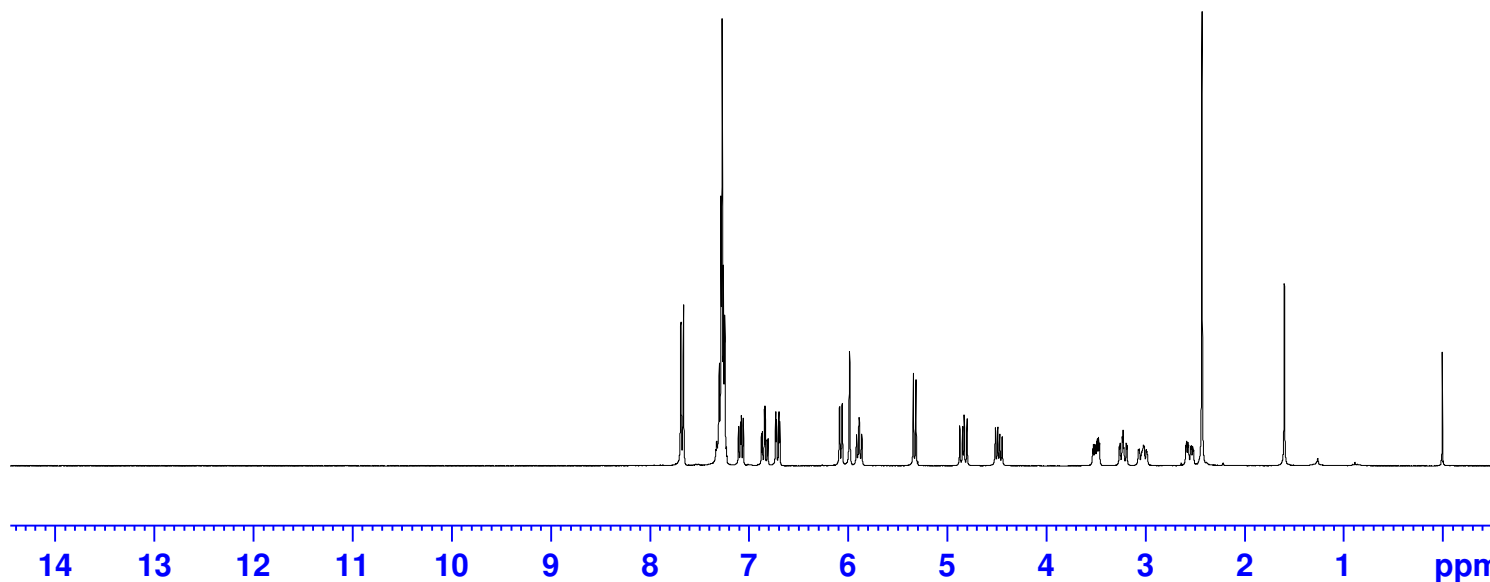

2.02  
7.65  
1.02  
1.01  
0.98  
0.97  
0.96  
0.96  
0.96  
0.98  
0.96  
1.00  
1.01  
1.00  
1.01  
3.02



3sjwei 5227 xh1-2-76 13c cdcl3

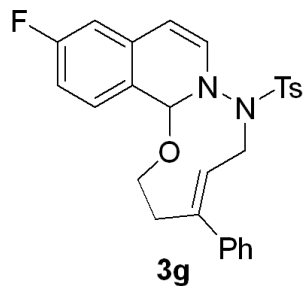

164.59  
161.33  
146.98  
144.58  
143.02  
135.75  
135.39  
134.05  
133.93  
129.96  
129.88  
129.76  
128.53  
128.31  
127.69  
126.46  
123.58  
123.55  
121.62  
113.11  
112.81  
110.11  
109.82  
98.64  
98.61  
88.38  
77.57  
77.15  
76.73  
63.56  
49.16  
32.99  
21.75

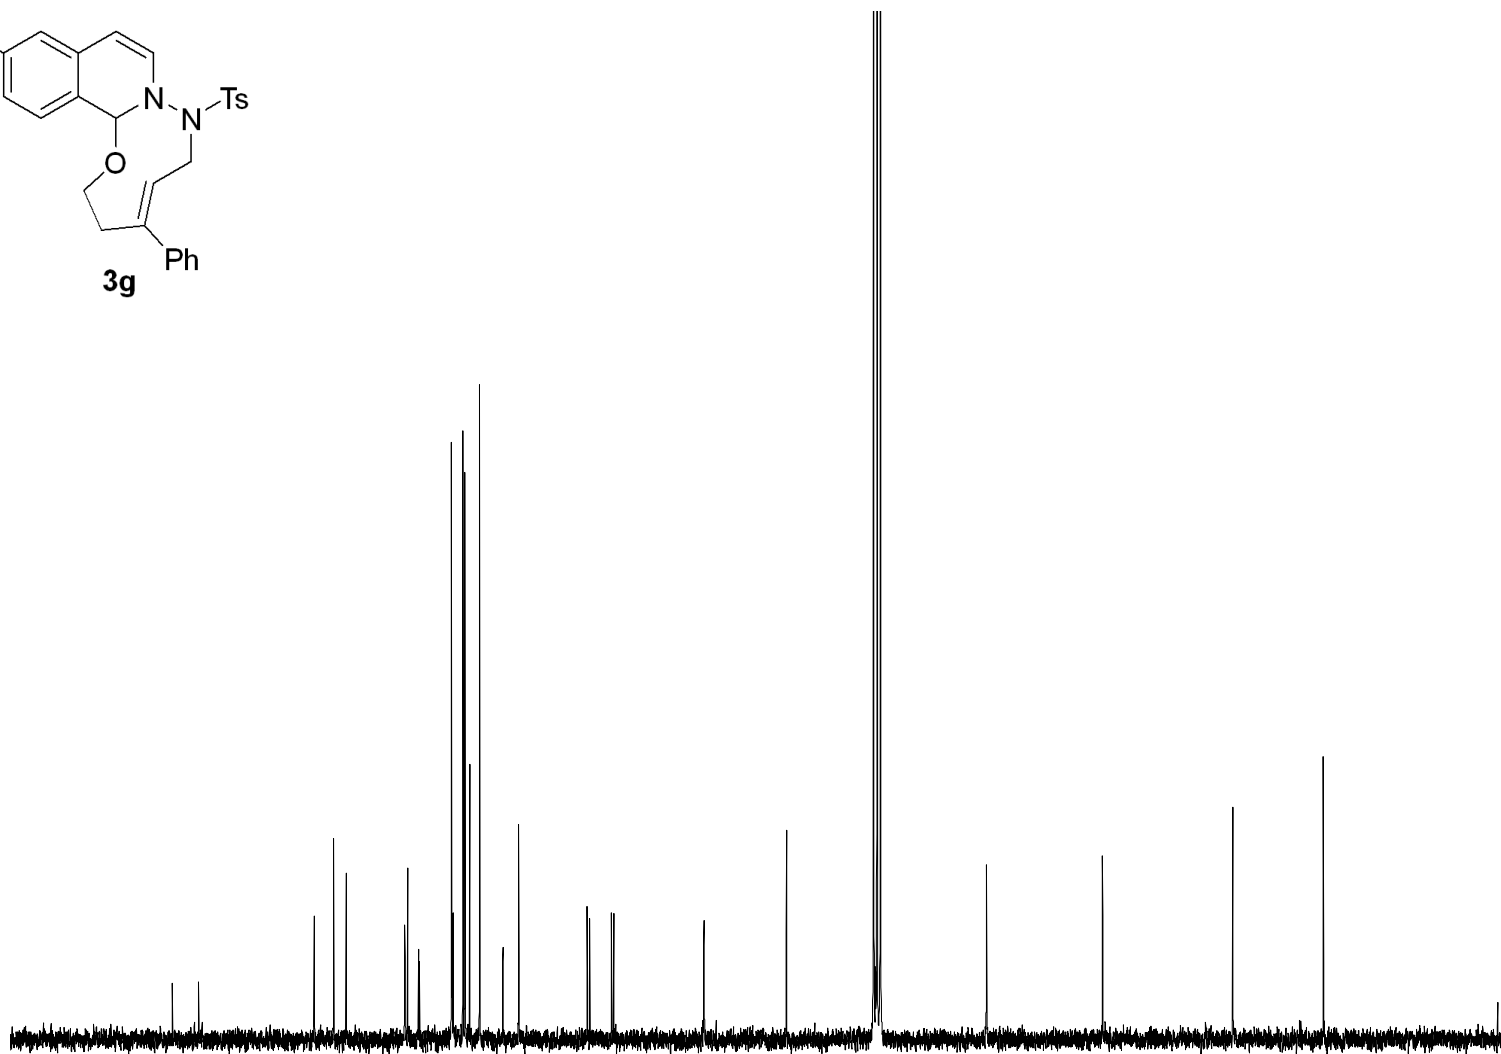

Current Data Parameters  
NAME 2021-4--11Project 1 data  
EXPNO 5227  
PROCNO 1

F2 - Acquisition Parameters  
Date\_ 20210906  
Time 11.43  
INSTRUM spect  
PROBHD 5 mm PABBO BB-  
PULPROG zgpg30  
TD 65536  
SOLVENT CDCl3  
NS 1024  
DS 4  
SWH 18028.846 Hz  
FIDRES 0.275098 Hz  
AQ 1.8175317 sec  
RG 203  
DW 27.733 usec  
DE 6.50 usec  
TE -59.1 K  
D1 2.00000000 sec  
D11 0.03000000 sec  
TD0 1

===== CHANNEL f1 =====  
SFO1 75.4752949 MHz  
NUC1 13C  
P1 9.50 usec  
PLW1 34.20000076 W

===== CHANNEL f2 =====  
SFO2 300.1312005 MHz  
NUC2 1H  
CPDPRG[2] waltz16  
PCPD2 90.00 usec  
PLW2 14.00000000 W  
PLW12 0.17284000 W  
PLW13 0.14000000 W

F2 - Processing parameters  
SI 32768  
SF 75.4677410 MHz  
WDW EM  
SSB 0  
LB 1.00 Hz  
GB 0  
PC 1.40

180 170 160 150 140 130 120 110 100 90 80 70 60 50 40 30 20 ppm

3sjwei 5228 xh1-2-76 19f cdcl3

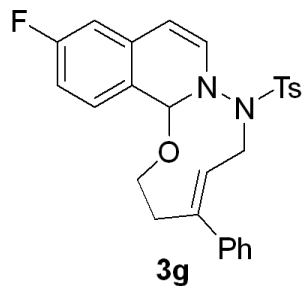

-113.398

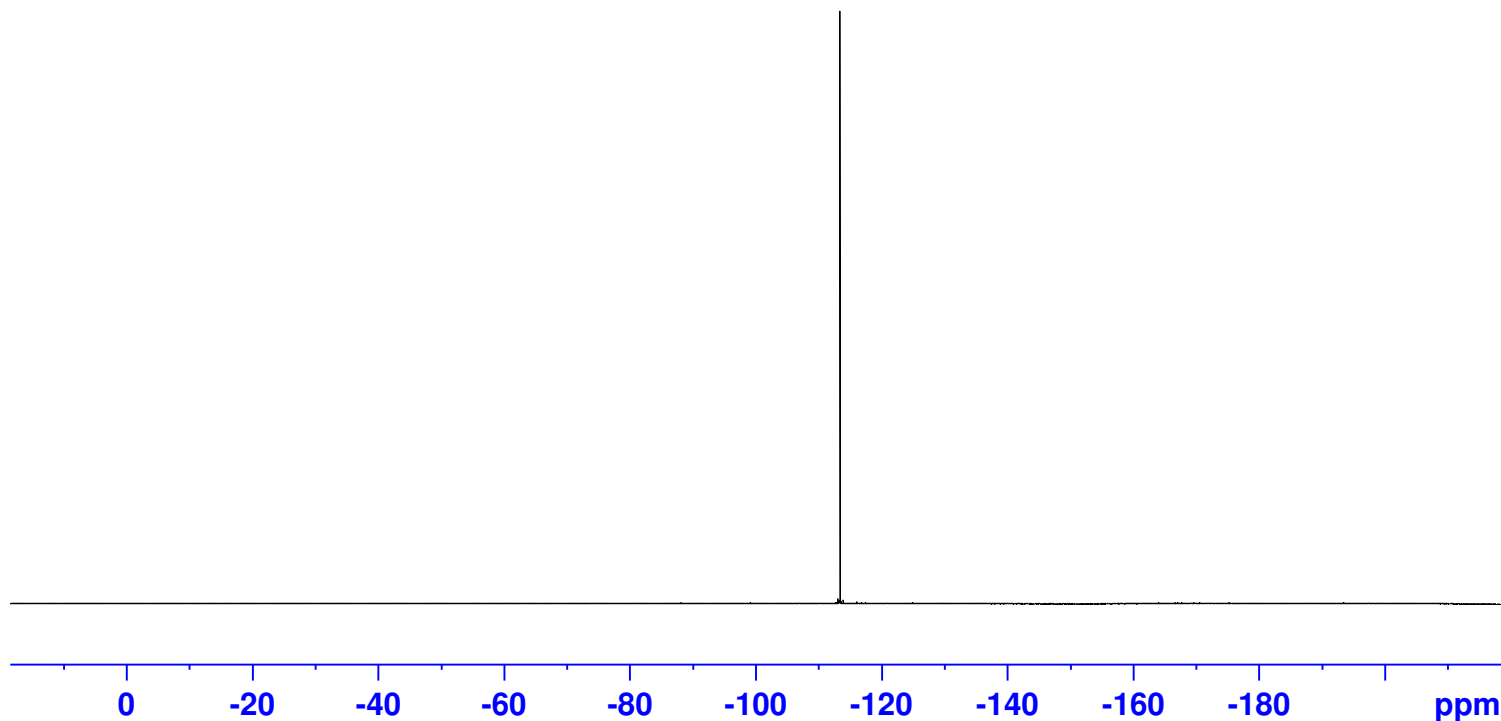

Current Data Parameters  
NAME 0906sjw  
EXPNO 5228  
PROCNO 1

F2 - Acquisition Parameters  
Date\_ 20210906  
Time 11.45  
INSTRUM spect  
PROBHD 5 mm PABBO BB-  
PULPROG zgfhigqn.2  
TD 131072  
SOLVENT CDC13  
NS 16  
DS 4  
SWH 66964.289 Hz  
FIDRES 0.510897 Hz  
AQ 0.9786710 sec  
RG 203  
DW 7.467 usec  
DE 6.50 usec  
TE -59.1 K  
D1 1.00000000 sec  
D11 0.03000000 sec  
D12 0.00002000 sec  
TD0 1

==== CHANNEL f1 =====  
SFO1 282.3761148 MHz  
NUC1 19F  
P1 14.50 usec  
PLW1 10.39999962 W

==== CHANNEL f2 =====  
SFO2 300.1312005 MHz  
NUC2 1H  
CPDPRG[2] waltz16  
PCPD2 90.00 usec  
PLW2 14.00000000 W  
PLW12 0.17284000 W

F2 - Processing parameters  
SI 65536  
SF 282.4043552 MHz  
WDW EM  
SSB 0  
LB 0.30 Hz  
GB 0  
PC 1.00

3sjwei 5066 xh1-2-35 1h cdcl3

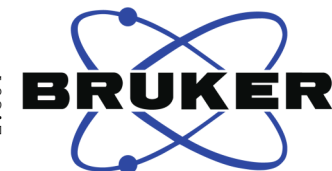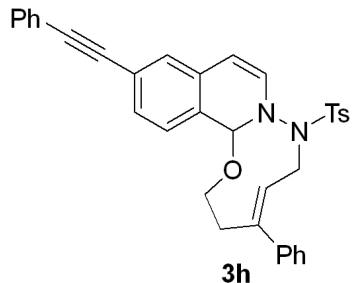

7.690  
7.662  
7.538  
7.525  
7.513  
7.506  
7.355  
7.352  
7.341  
7.333  
7.321  
7.317  
7.302  
7.295  
7.284  
7.275  
7.265  
7.258  
7.239  
7.228  
7.102  
7.076  
6.076  
6.051  
5.983  
5.935  
5.908  
5.882  
5.380  
5.355  
4.878  
4.848  
4.833  
4.804  
4.524  
4.500  
4.479  
4.455  
3.541  
3.533  
3.522  
3.513  
3.502  
3.493  
3.482  
3.474  
3.276  
3.253  
3.246  
3.214  
3.051  
3.008  
2.979  
2.597  
2.584

Current Data Parameters  
NAME 2021-4--11Project 1 data  
EXPNO 5066  
PROCNO 1

F2 - Acquisition Parameters  
Date\_ 20210825  
Time 9.10  
INSTRUM spect  
PROBHD 5 mm PABBO BB-  
PULPROG zg30  
TD 65536  
SOLVENT CDC13  
NS 16  
DS 2  
SWH 6009.615 Hz  
FIDRES 0.091699 Hz  
AQ 5.4525952 sec  
RG 203  
DW 83.200 usec  
DE 6.50 usec  
TE -59.1 K  
D1 1.00000000 sec  
TD0 1

==== CHANNEL f1 =====  
SFO1 300.1318534 MHz  
NUC1 1H  
P1 10.00 usec  
PLW1 14.00000000 W

F2 - Processing parameters  
SI 65536  
SF 300.1300078 MHz  
WDW EM  
SSB 0  
LB 0.30 Hz  
GB 0  
PC 1.00

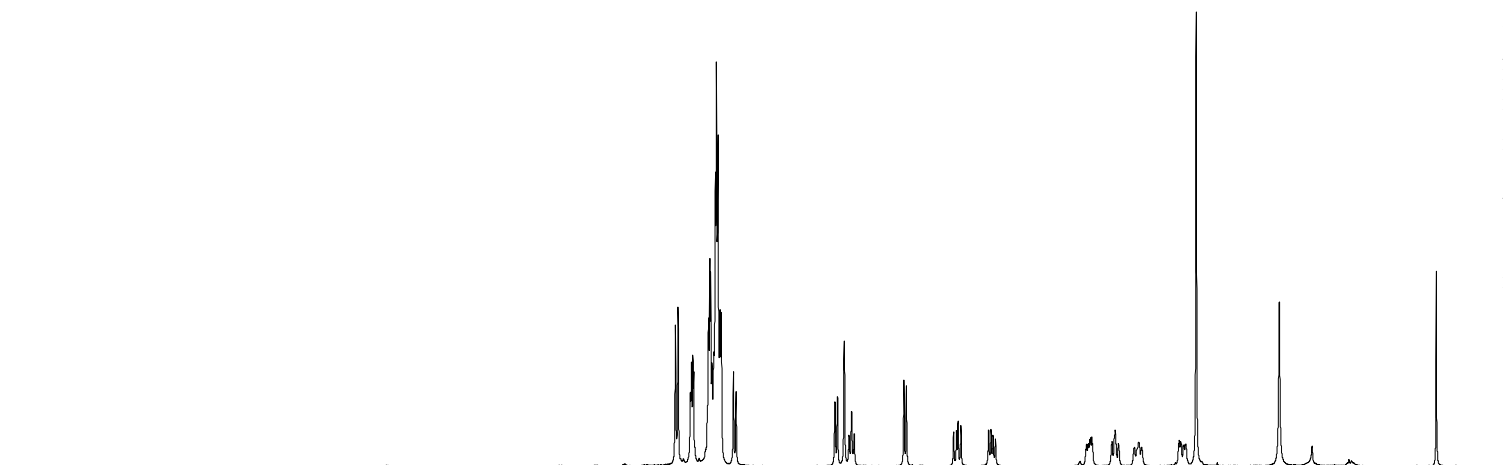

14 13 12 11 10 9 8 7 6 5 4 3 2 1 ppm

2.02  
2.17  
3.86  
9.35  
1.06  
0.99  
0.98  
1.00  
0.96  
0.97  
0.98  
0.99  
1.03  
0.99  
1.06  
3.07

3sjwei 5081 xh1-2-35 13c cdcl3

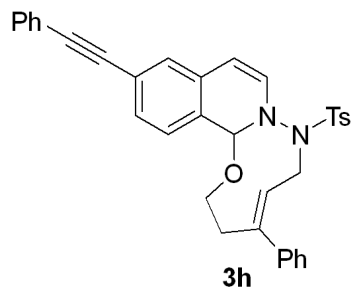

146.87  
144.56  
143.04  
135.38  
132.00  
131.76  
129.96  
128.80  
128.54  
128.49  
128.35  
128.01  
127.69  
127.36  
127.22  
126.47  
123.75  
123.25  
121.75

98.81  
89.72  
89.21  
88.53  
77.57  
77.15  
76.73  
63.64  
49.13  
33.03  
21.77

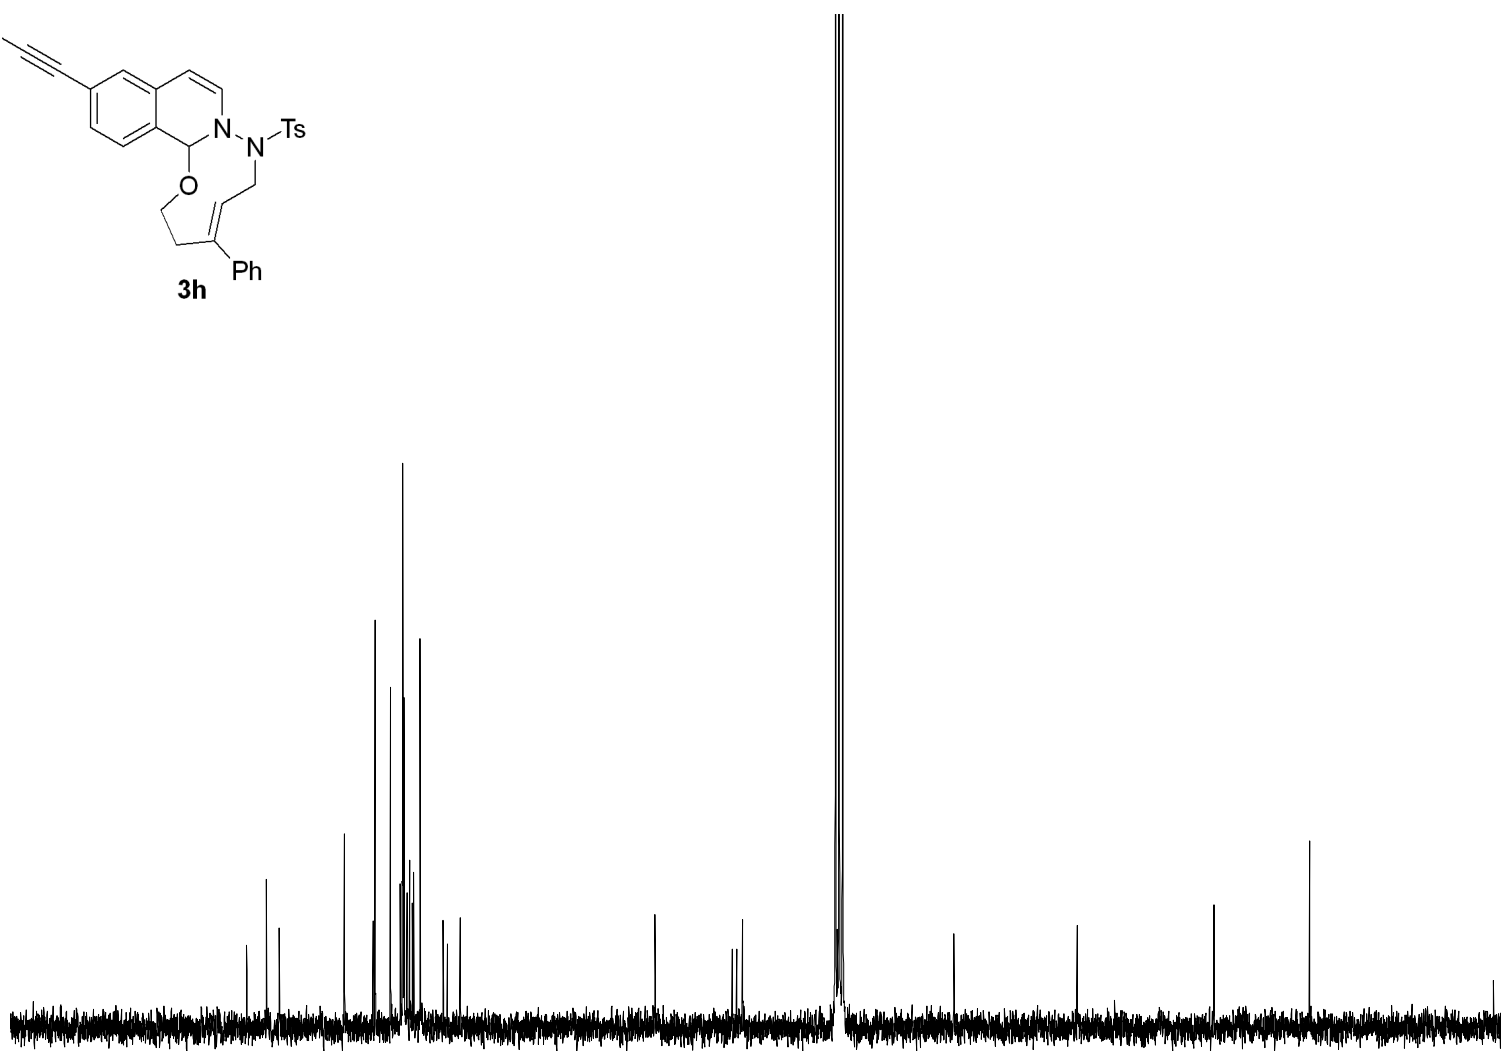

Current Data Parameters  
NAME 2021-4--11Project 1 data  
EXPNO 5081  
PROCNO 1

F2 - Acquisition Parameters  
Date\_ 20210825  
Time 11.34  
INSTRUM spect  
PROBHD 5 mm PABBO BB-  
PULPROG zgpg30  
TD 65536  
SOLVENT CDC13  
NS 1024  
DS 4  
SWH 18028.846 Hz  
FIDRES 0.275098 Hz  
AQ 1.8175317 sec  
RG 203  
DW 27.733 usec  
DE 6.50 usec  
TE -59.1 K  
D1 2.00000000 sec  
D11 0.03000000 sec  
TD0 1

===== CHANNEL f1 =====  
SFO1 75.4752949 MHz  
NUC1 13C  
P1 9.50 usec  
PLW1 34.20000076 W

===== CHANNEL f2 =====  
SFO2 300.1312005 MHz  
NUC2 1H  
CPDPRG[2] waltz16  
PCPD2 90.00 usec  
PLW2 14.00000000 W  
PLW12 0.17284000 W  
PLW13 0.14000000 W

F2 - Processing parameters  
SI 32768  
SF 75.4677404 MHz  
WDW EM  
SSB 0  
LB 1.00 Hz  
GB 0  
PC 1.40

170 160 150 140 130 120 110 100 90 80 70 60 50 40 30 20 ppm

xh1-5-31

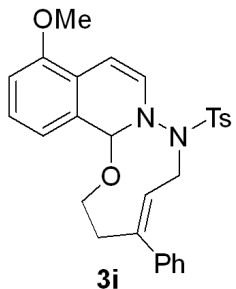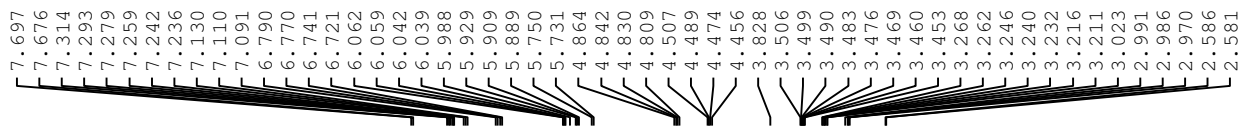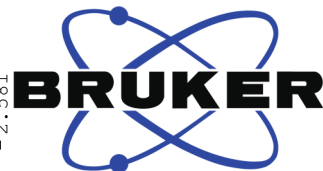

Current Data Parameters  
NAME 220726-400  
EXPNO 64  
PROCNO 1

F2 - Acquisition Parameters  
Date\_ 20220726  
Time 16.28  
INSTRUM spect  
PROBHD 5 mm PABBO BB-  
PULPROG zg30  
TD 65536  
SOLVENT CDCl3  
NS 6  
DS 0  
SWH 8223.685 Hz  
FIDRES 0.125483 Hz  
AQ 3.9845889 sec  
RG 75.43  
DW 60.800 usec  
DE 6.50 usec  
TE 294.7 K  
D1 1.00000000 sec  
TD0 1

==== CHANNEL f1 =====  
NUC1 1H  
P1 14.68 usec  
PLW1 14.00000000 W  
SFO1 400.1924713 MHz

F2 - Processing parameters  
SI 65536  
SF 400.1900188 MHz  
WDW EM  
SSB 0  
LB 0.30 Hz  
GB 0  
PC 1.00

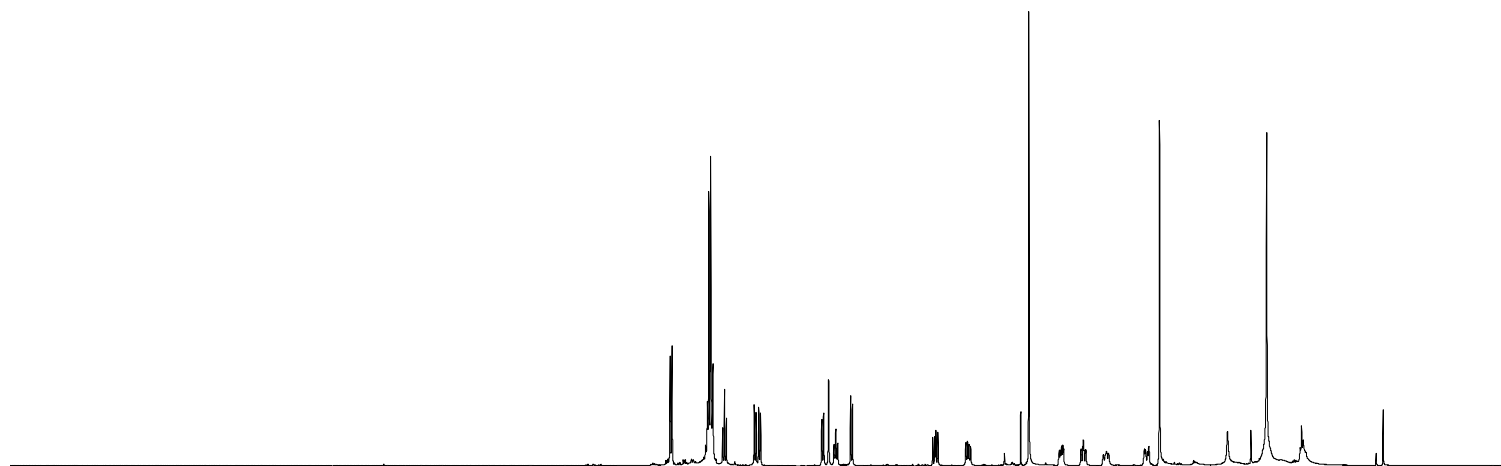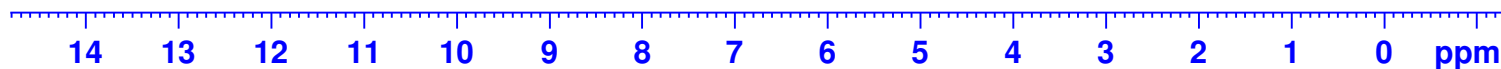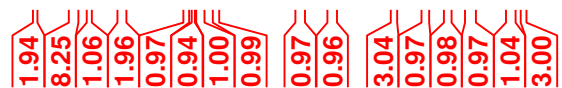

XHL-5-31

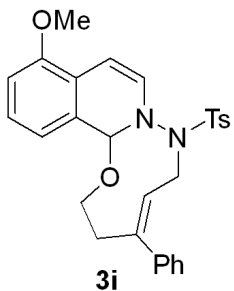

Current Data Parameters  
 NAME 220725-400  
 EXPNO 60  
 PROCNO 1

F2 - Acquisition Parameters  
 Date\_ 20220725  
 Time 16.44  
 INSTRUM spect  
 PROBHD 5 mm PABBO BB-  
 PULPROG zgpg30  
 TD 65536  
 SOLVENT CDC13  
 NS 65  
 DS 4  
 SWH 24038.461 Hz  
 FIDRES 0.366798 Hz  
 AQ 1.3631488 sec  
 RG 193.13  
 DW 20.800 usec  
 DE 6.50 usec  
 TE 295.3 K  
 D1 2.00000000 sec  
 D11 0.03000000 sec  
 TD0 1

===== CHANNEL f1 =====  
 NUC1 13C  
 P1 12.00 usec  
 PLW1 53.00000000 W  
 SFO1 100.6379178 MHz

===== CHANNEL f2 =====  
 CPDPRG[2] waltz16  
 NUC2 1H  
 PCPD2 90.00 usec  
 PLW2 14.00000000 W  
 PLW12 0.37246999 W  
 PLW13 0.30170000 W  
 SFO2 400.1916008 MHz

F2 - Processing parameters  
 SI 32768  
 SF 100.6278493 MHz  
 WDW EM  
 SSB 0  
 LB 1.00 Hz  
 GB 0  
 PC 1.40

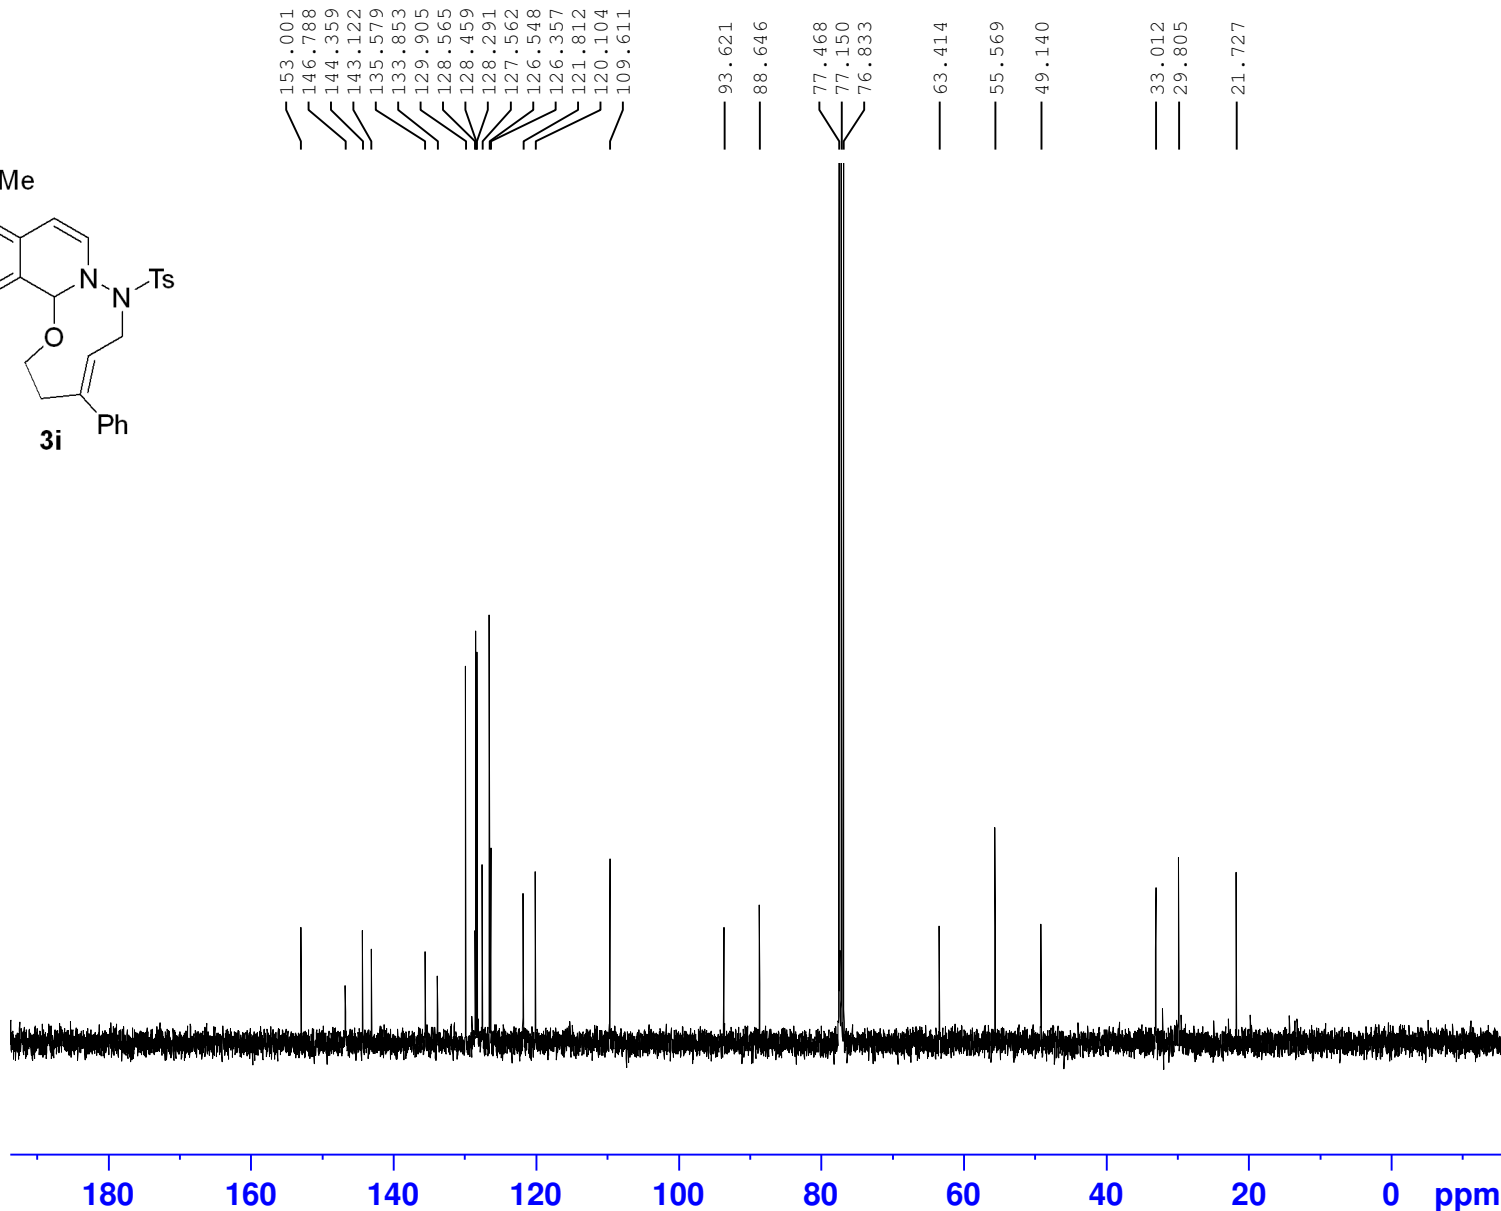

XHL-5-40

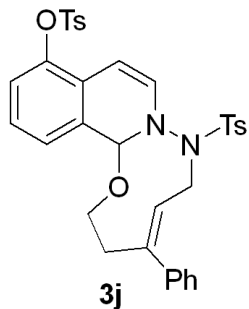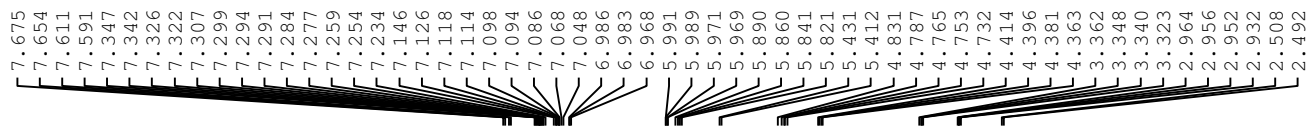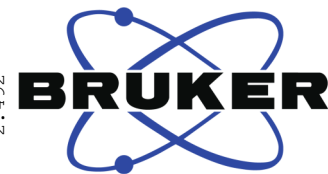

Current Data Parameters  
 NAME 220729-400  
 EXPNO 101  
 PROCNO 1

F2 - Acquisition Parameters  
 Date\_ 20220729  
 Time 21.00  
 INSTRUM spect  
 PROBHD 5 mm PABBO BB-  
 PULPROG zg30  
 TD 65536  
 SOLVENT CDC13  
 NS 8  
 DS 2  
 SWH 8223.685 Hz  
 FIDRES 0.125483 Hz  
 AQ 3.9845889 sec  
 RG 113.67  
 DW 60.800 usec  
 DE 6.50 usec  
 TE 294.8 K  
 D1 1.00000000 sec  
 TD0 1

==== CHANNEL f1 =====  
 NUC1 1H  
 P1 14.68 usec  
 PLW1 14.00000000 W  
 SFO1 400.1924713 MHz

F2 - Processing parameters  
 SI 65536  
 SF 400.1900171 MHz  
 WDW EM  
 SSB 0  
 LB 0.30 Hz  
 GB 0  
 PC 1.00

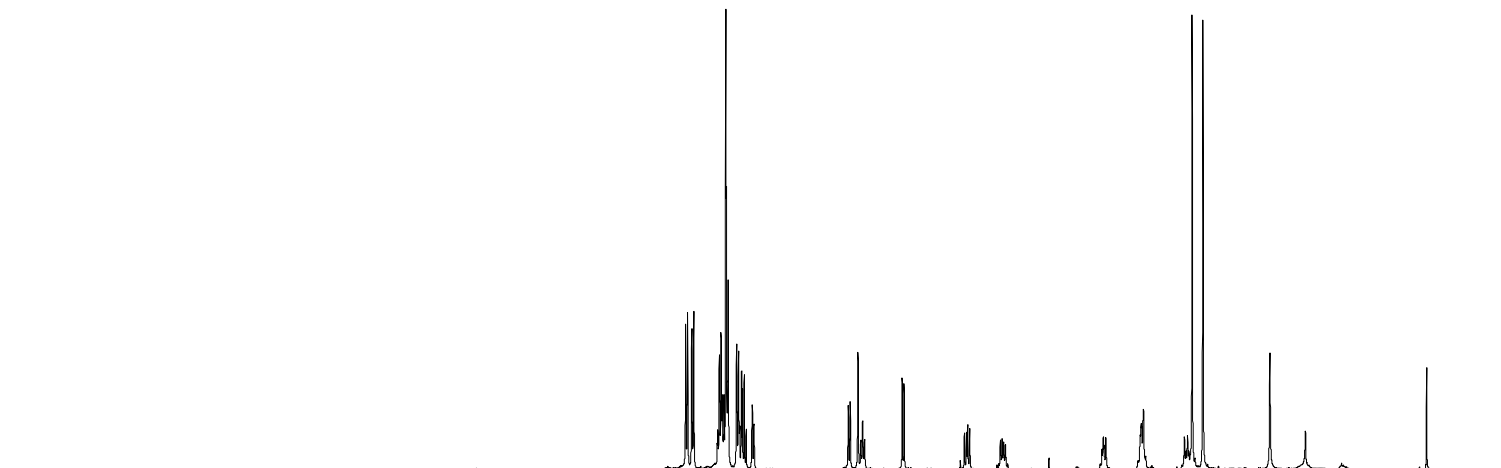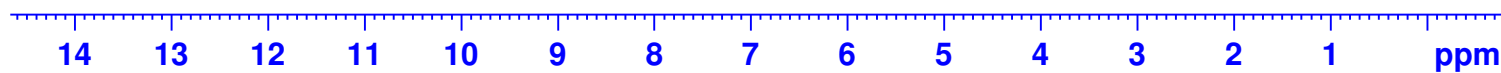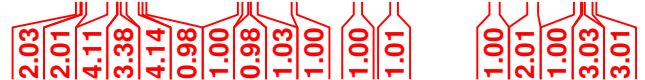

XHL-5-40

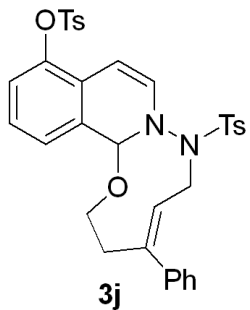

146.91  
145.50  
144.71  
143.18  
142.98  
135.50  
135.02  
132.60  
130.00  
129.75  
129.38  
128.58  
128.57  
128.31  
127.78  
126.70  
126.57  
126.11  
125.93  
122.22  
121.60

93.04  
87.82  
77.47  
77.15  
76.83  
63.23  
48.71  
33.02  
21.76  
21.73

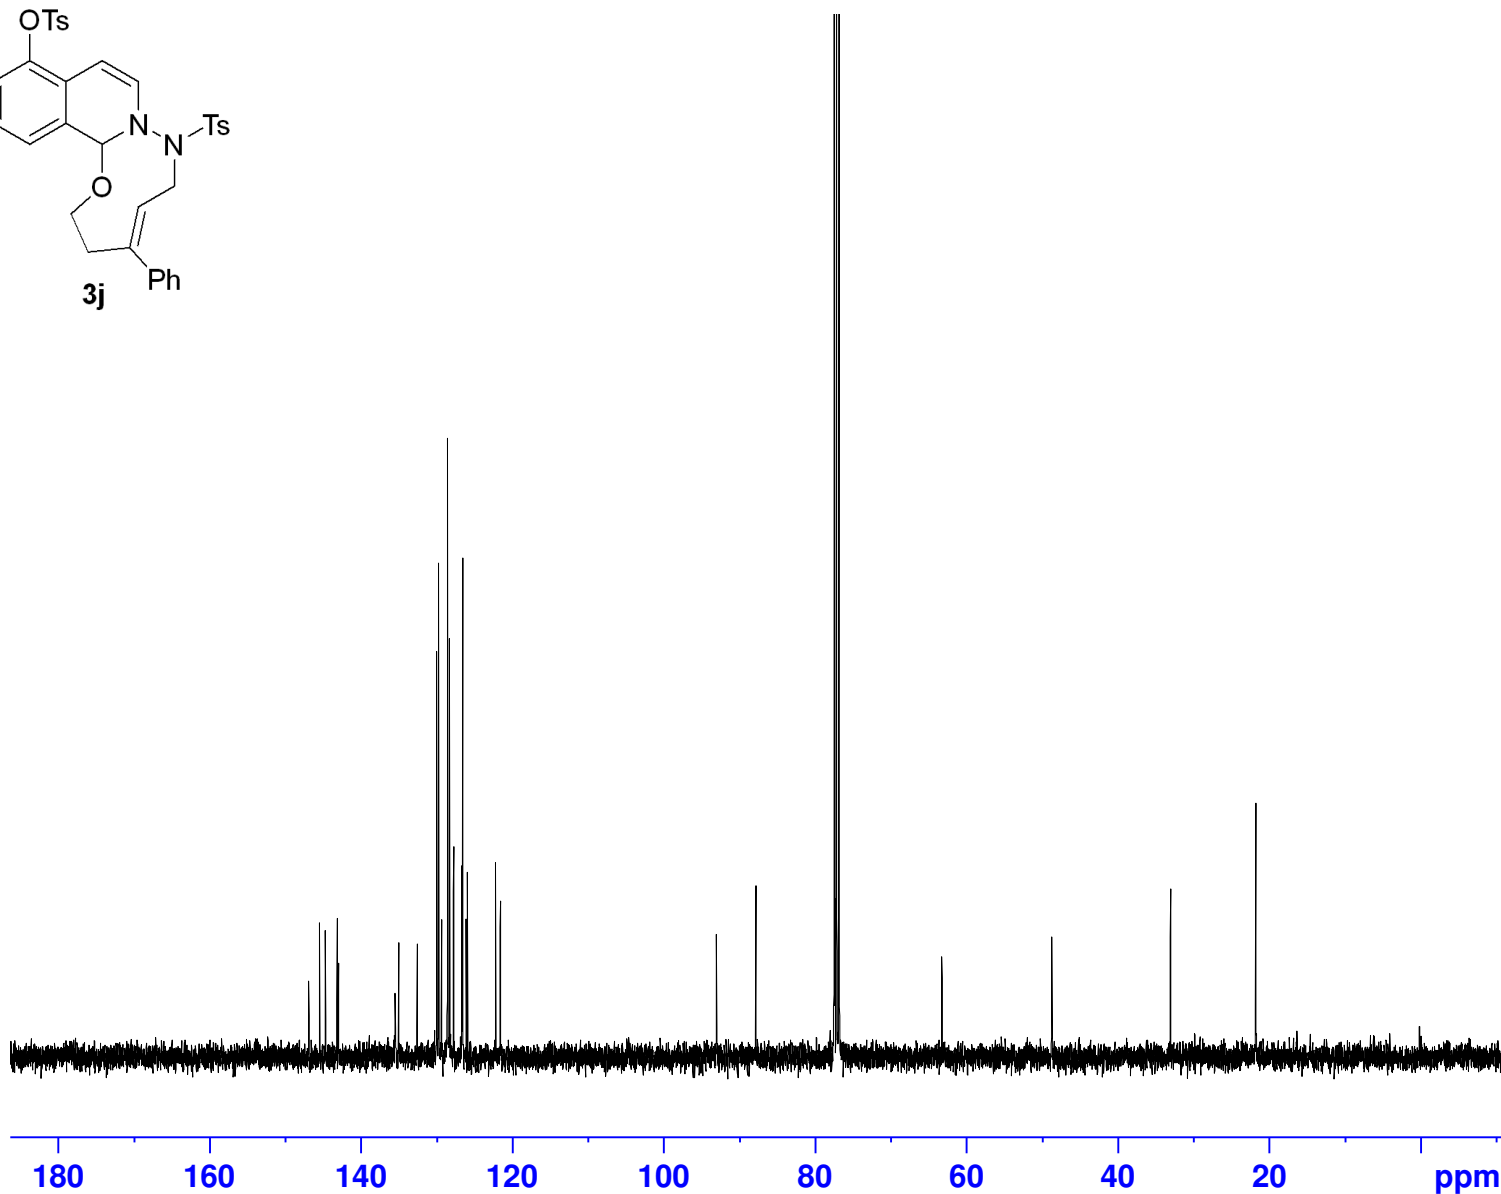

Current Data Parameters  
NAME 220729-400  
EXPNO 102  
PROCNO 1

F2 - Acquisition Parameters  
Date\_ 20220729  
Time 21.04  
INSTRUM spect  
PROBHD 5 mm PABBO BB-  
PULPROG zgpg30  
TD 65536  
SOLVENT CDCl3  
NS 166  
DS 4  
SWH 24038.461 Hz  
FIDRES 0.366798 Hz  
AQ 1.3631488 sec  
RG 193.13  
DW 20.800 usec  
DE 6.50 usec  
TE 295.4 K  
D1 2.00000000 sec  
D11 0.03000000 sec  
TD0 1

==== CHANNEL f1 =====  
NUC1 13C  
P1 12.00 usec  
PLW1 53.00000000 W  
SFO1 100.6379178 MHz

==== CHANNEL f2 =====  
CPDPRG[2] waltz16  
NUC2 1H  
PCPD2 90.00 usec  
PLW2 14.00000000 W  
PLW12 0.37246999 W  
PLW13 0.30170000 W  
SFO2 400.1916008 MHz

F2 - Processing parameters  
SI 32768  
SF 100.6278481 MHz  
WDW EM  
SSB 0  
LB 1.00 Hz  
GB 0  
PC 1.40



3sjwei 5458 xh1-3-15 1h cdcl3

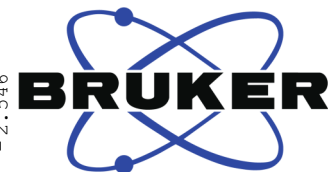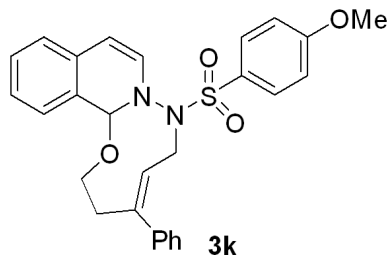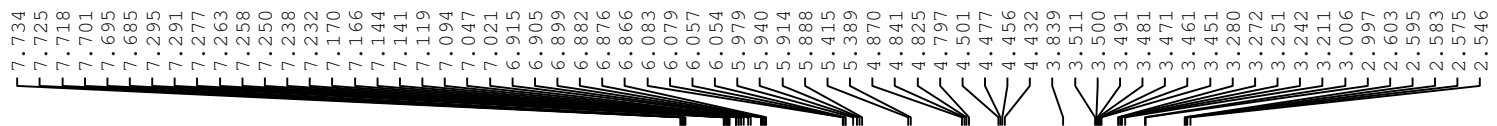

Current Data Parameters  
NAME 2021-4--11Project 1 data  
EXPNO 5458  
PROCNO 1

F2 - Acquisition Parameters  
Date\_ 20210929  
Time 9.32  
INSTRUM spect  
PROBHD 5 mm PABBO BB-  
PULPROG zg30  
TD 65536  
SOLVENT CDCl3  
NS 16  
DS 2  
SWH 6009.615 Hz  
FIDRES 0.091699 Hz  
AQ 5.4525952 sec  
RG 101  
DW 83.200 usec  
DE 6.50 usec  
TE -59.1 K  
D1 1.00000000 sec  
TD0 1

==== CHANNEL f1 =====  
SFO1 300.1318534 MHz  
NUC1 1H  
P1 10.00 usec  
PLW1 14.00000000 W

F2 - Processing parameters  
SI 65536  
SF 300.1300103 MHz  
WDW EM  
SSB 0  
LB 0.30 Hz  
GB 0  
PC 1.00

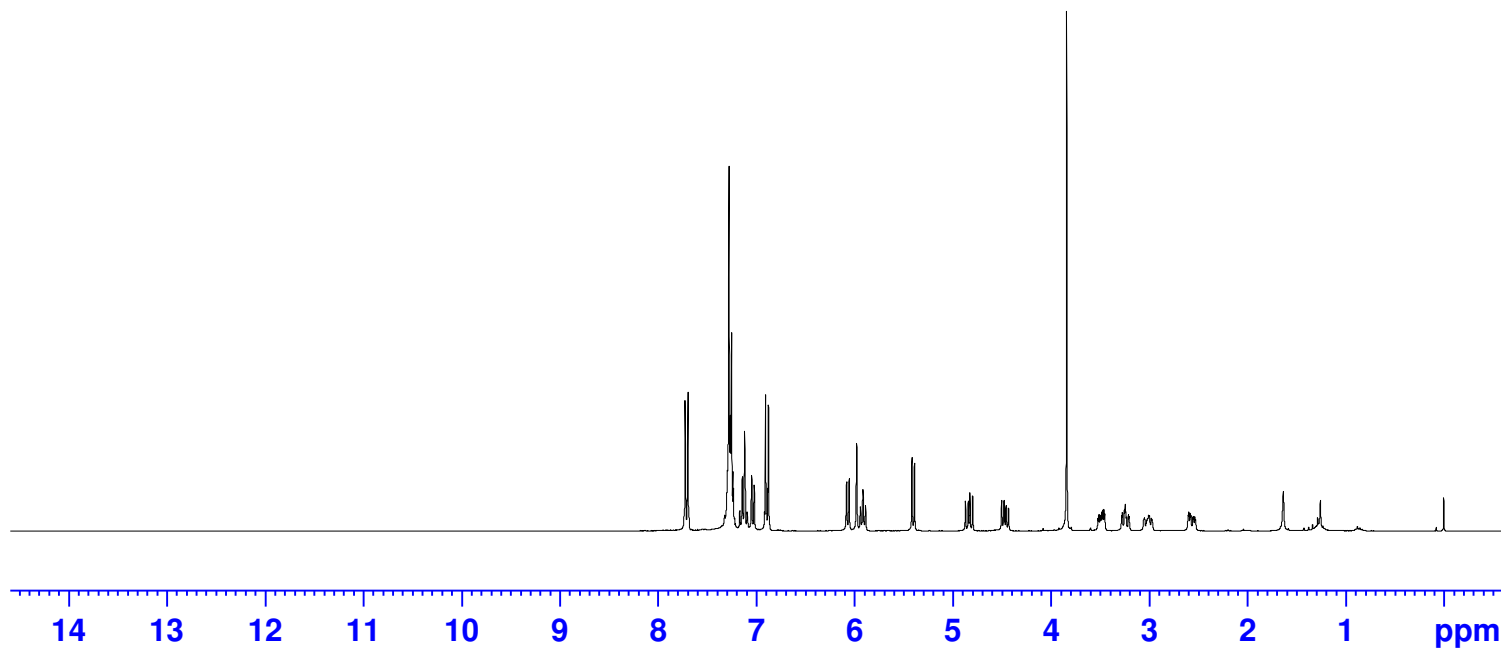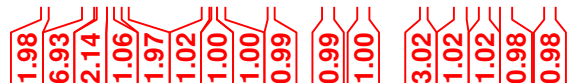

3sjwei 5456 xh1-3-15 13c cdcl3

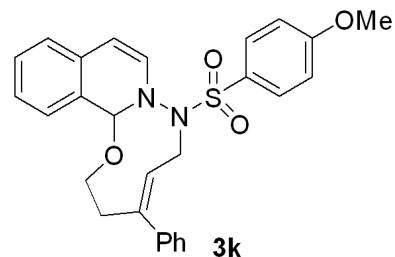

163.59  
146.66  
143.08  
134.54  
131.85  
130.50  
129.77  
128.78  
128.49  
127.90  
127.60  
126.50  
125.77  
124.13  
121.84  
114.43  
99.43  
88.89  
77.57  
77.15  
76.72  
63.52  
55.76  
48.95  
33.01

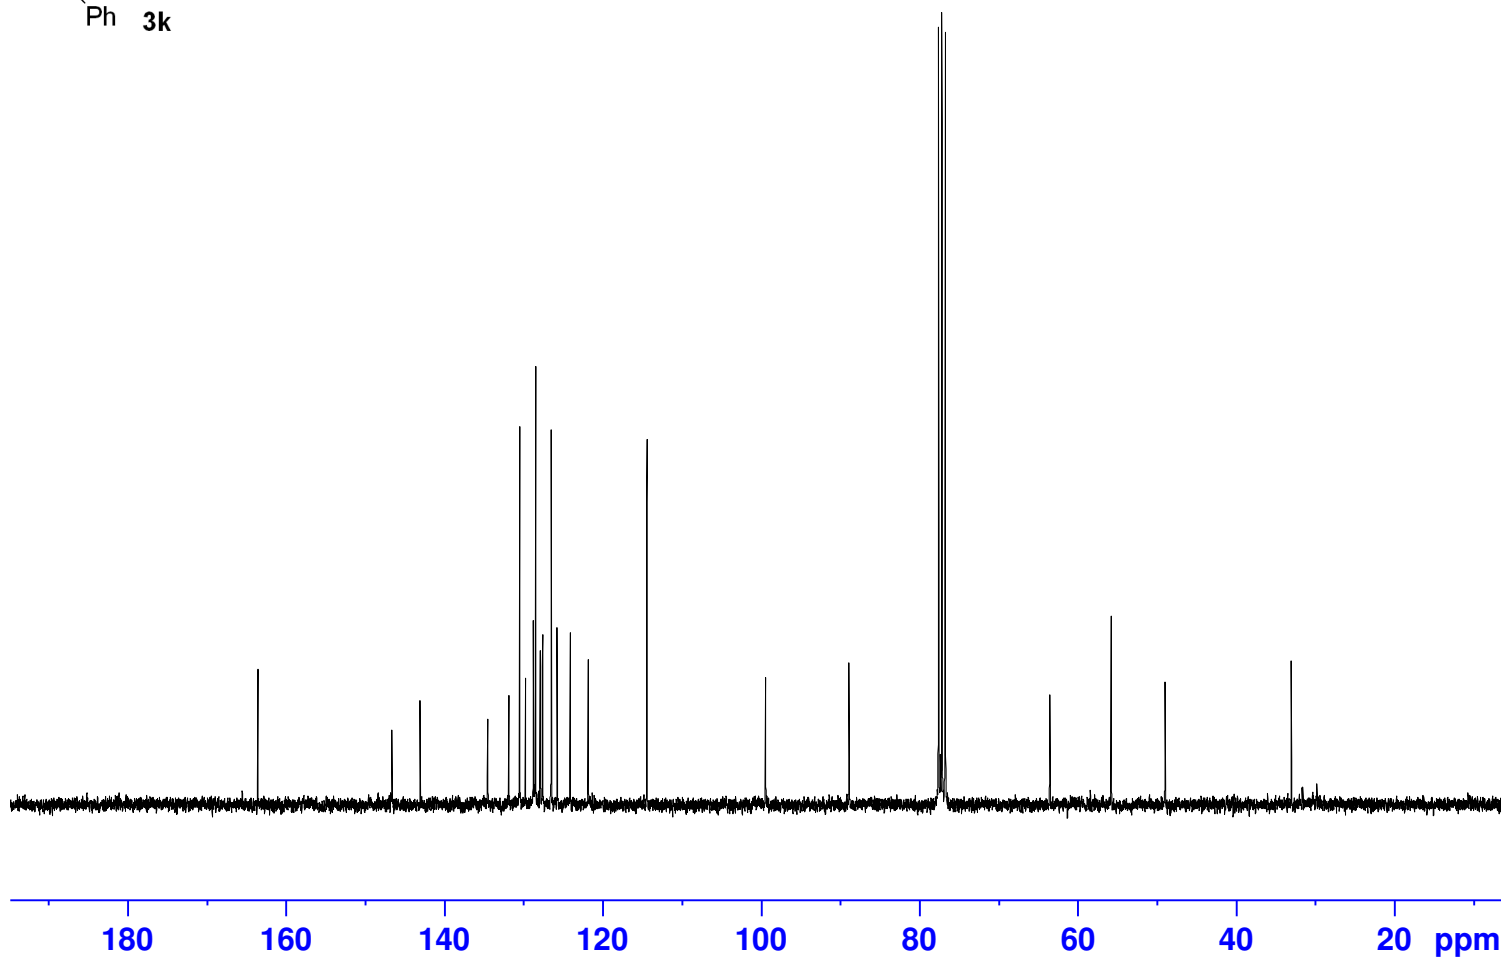

Current Data Parameters  
NAME 2021-4--11Project 1 data  
EXPNO 5456  
PROCNO 1

F2 - Acquisition Parameters  
Date\_ 20210928  
Time 13.36  
INSTRUM spect  
PROBHD 5 mm PABBO BB-  
PULPROG zgpg30  
TD 65536  
SOLVENT CDC13  
NS 648  
DS 4  
SWH 18028.846 Hz  
FIDRES 0.275098 Hz  
AQ 1.8175317 sec  
RG 203  
DW 27.733 usec  
DE 6.50 usec  
TE -59.1 K  
D1 2.00000000 sec  
D11 0.03000000 sec  
TD0 1

===== CHANNEL f1 =====  
SFO1 75.4752949 MHz  
NUC1 13C  
P1 9.50 usec  
PLW1 34.20000076 W

===== CHANNEL f2 =====  
SFO2 300.1312005 MHz  
NUC2 1H  
CPDPRG[2] waltz16  
PCPD2 90.00 usec  
PLW2 14.00000000 W  
PLW12 0.17284000 W  
PLW13 0.14000000 W

F2 - Processing parameters  
SI 32768  
SF 75.4677421 MHz  
WDW EM  
SSB 0  
LB 1.00 Hz  
GB 0  
PC 1.40

3sjwei 5427 xh1-3-9 1h cdcl3

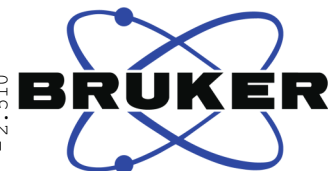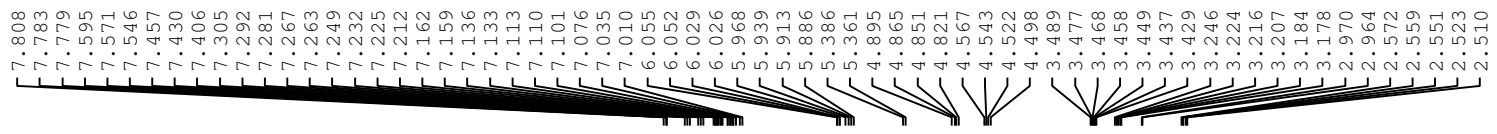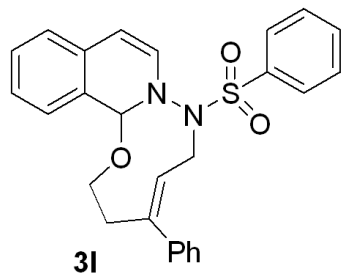

Current Data Parameters  
NAME 2021-4--11Project 1 data  
EXPNO 5427  
PROCNO 1

F2 - Acquisition Parameters  
Date\_ 20210927  
Time 9.14  
INSTRUM spect  
PROBHD 5 mm PABBO BB-  
PULPROG zg30  
TD 65536  
SOLVENT CDC13  
NS 16  
DS 2  
SWH 6009.615 Hz  
FIDRES 0.091699 Hz  
AQ 5.4525952 sec  
RG 32  
DW 83.200 usec  
DE 6.50 usec  
TE -59.1 K  
D1 1.00000000 sec  
TD0 1

==== CHANNEL f1 =====  
SFO1 300.1318534 MHz  
NUC1 1H  
P1 10.00 usec  
PLW1 14.00000000 W

F2 - Processing parameters  
SI 65536  
SF 300.1300154 MHz  
WDW EM  
SSB 0  
LB 0.30 Hz  
GB 0  
PC 1.00

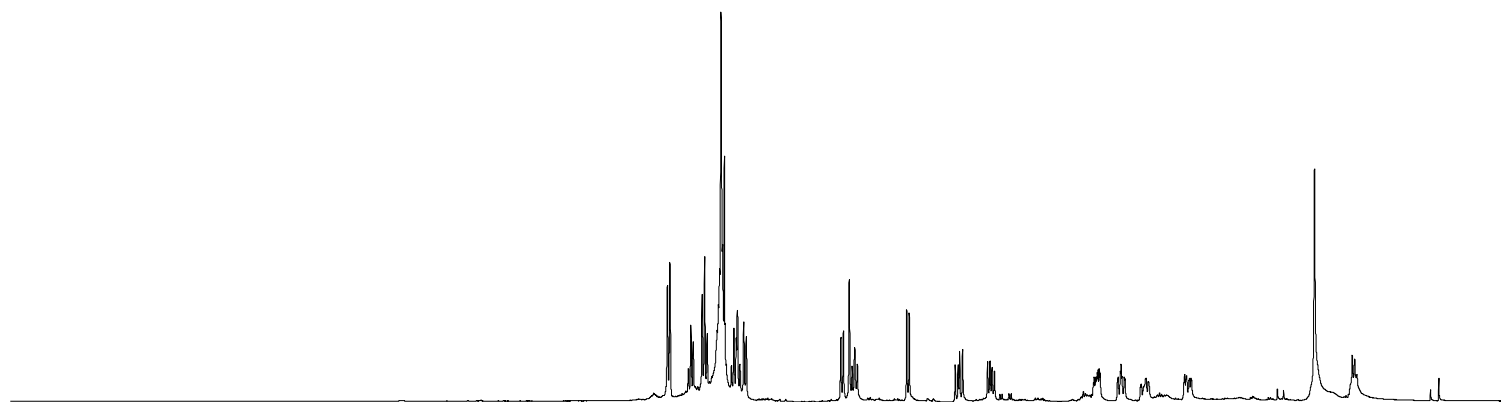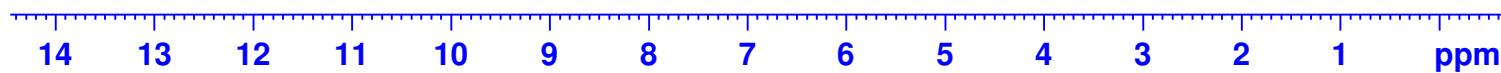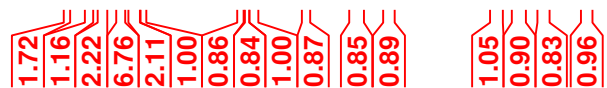

3sjwei 5459 xh1-3-9 13c cdcl3

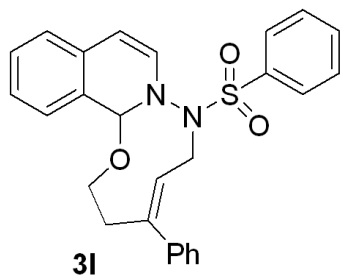

146.88  
143.07  
138.51  
134.79  
133.42  
131.79  
129.24  
128.79  
128.44  
128.18  
127.85  
127.58  
127.47  
126.41  
125.80  
124.11  
121.71

99.40

88.70

77.57  
77.15  
76.73

63.39

49.28

32.96

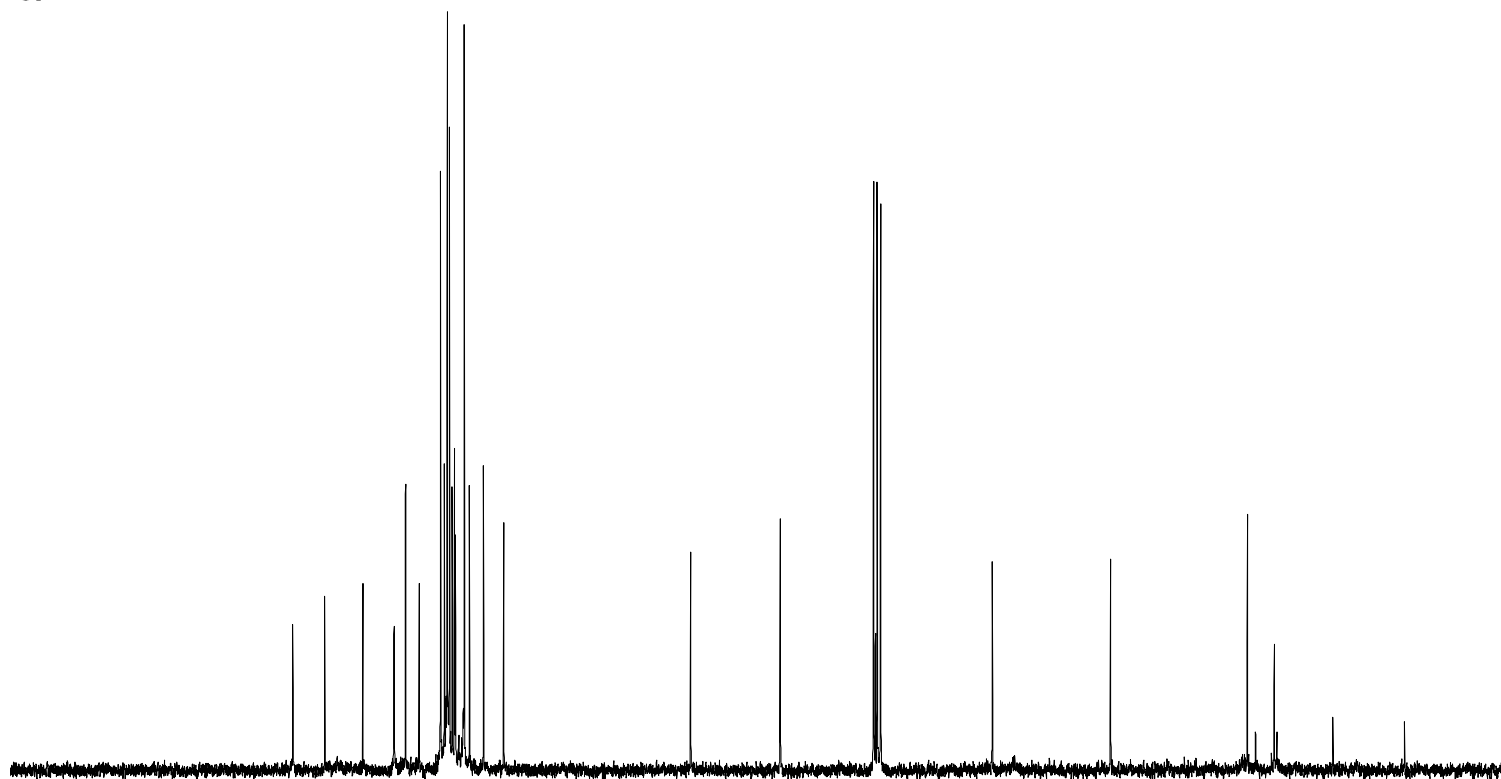

Current Data Parameters  
NAME 2021-4--11Project 1 data  
EXPNO 5459  
PROCNO 1

F2 - Acquisition Parameters  
Date\_ 20210927  
Time 12.20  
INSTRUM spect  
PROBHD 5 mm PABBO BB-  
PULPROG zgpg30  
TD 65536  
SOLVENT CDC13  
NS 500  
DS 4  
SWH 18028.846 Hz  
FIDRES 0.275098 Hz  
AQ 1.8175317 sec  
RG 203  
DW 27.733 usec  
DE 6.50 usec  
TE -59.1 K  
D1 2.00000000 sec  
D11 0.03000000 sec  
TD0 1

===== CHANNEL f1 =====  
SFO1 75.4752949 MHz  
NUC1 13C  
P1 9.50 usec  
PLW1 34.20000076 W

===== CHANNEL f2 =====  
SFO2 300.1312005 MHz  
NUC2 1H  
CPDPRG[2] waltz16  
PCPD2 90.00 usec  
PLW2 14.00000000 W  
PLW12 0.17284000 W  
PLW13 0.14000000 W

F2 - Processing parameters  
SI 32768  
SF 75.4677484 MHz  
WDW EM  
SSB 0  
LB 1.00 Hz  
GB 0  
PC 1.40

170 160 150 140 130 120 110 100 90 80 70 60 50 40 30 20 ppm

3sjwei 5428 xh1-3-11 1h cdcl3

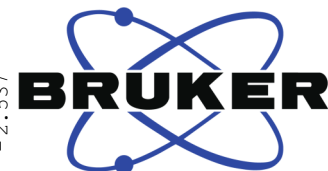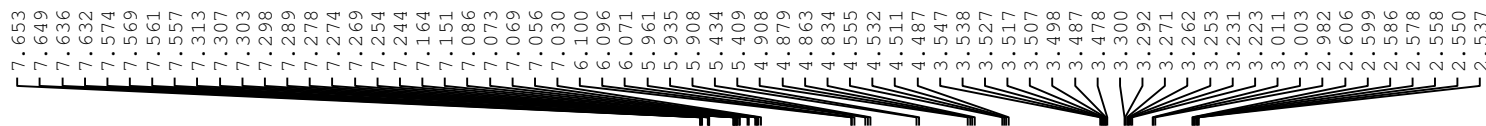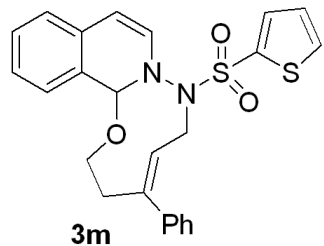

Current Data Parameters  
NAME 2021-4--11Project 1 data  
EXPNO 5428  
PROCNO 1

F2 - Acquisition Parameters  
Date\_ 20210927  
Time 9.19  
INSTRUM spect  
PROBHD 5 mm PABBO BB-  
PULPROG zg30  
TD 65536  
SOLVENT CDCl3  
NS 16  
DS 2  
SWH 6009.615 Hz  
FIDRES 0.091699 Hz  
AQ 5.4525952 sec  
RG 161  
DW 83.200 usec  
DE 6.50 usec  
TE -59.1 K  
D1 1.00000000 sec  
TD0 1

==== CHANNEL f1 =====  
SFO1 300.1318534 MHz  
NUC1 1H  
P1 10.00 usec  
PLW1 14.00000000 W

F2 - Processing parameters  
SI 65536  
SF 300.1300091 MHz  
WDW EM  
SSB 0  
LB 0.30 Hz  
GB 0  
PC 1.00

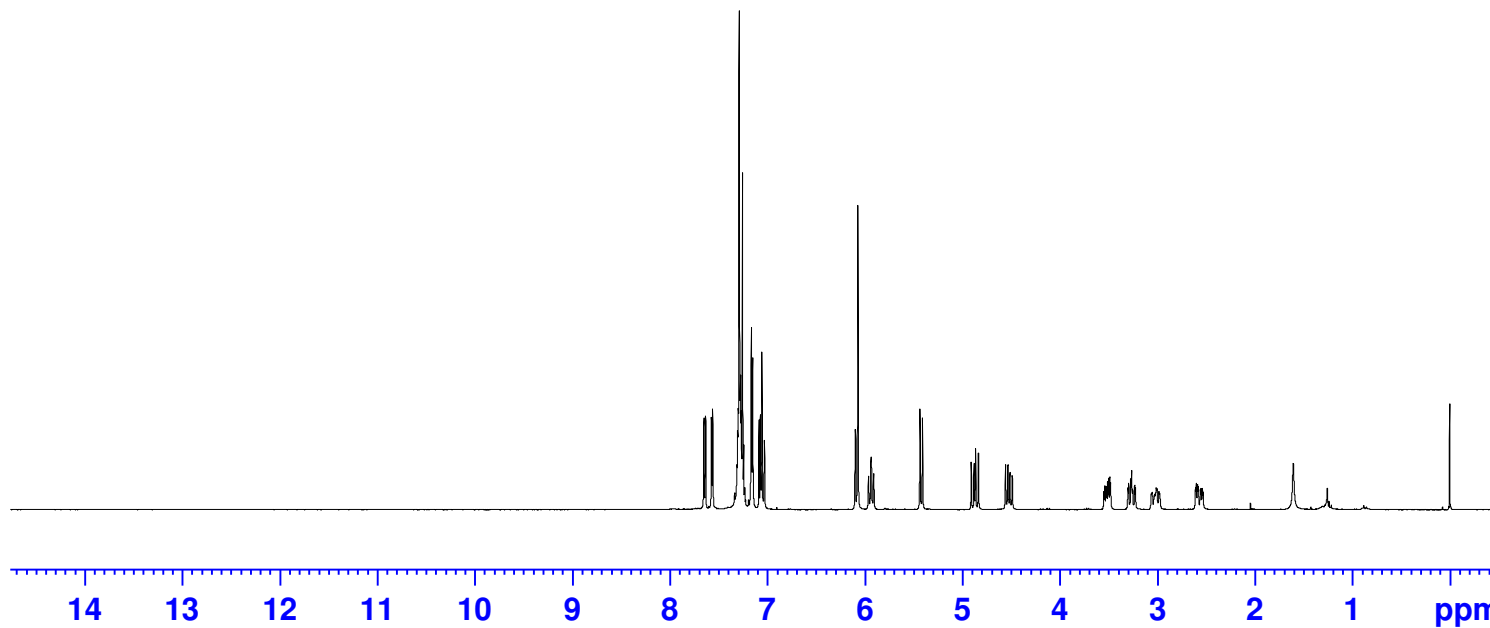

0.96  
0.98  
6.55  
1.92  
2.00  
1.89  
0.98  
0.98  
0.98  
1.00  
1.00  
1.01  
0.98  
0.99

3sjwei 5425 xh1-3-11 13c cdcl3

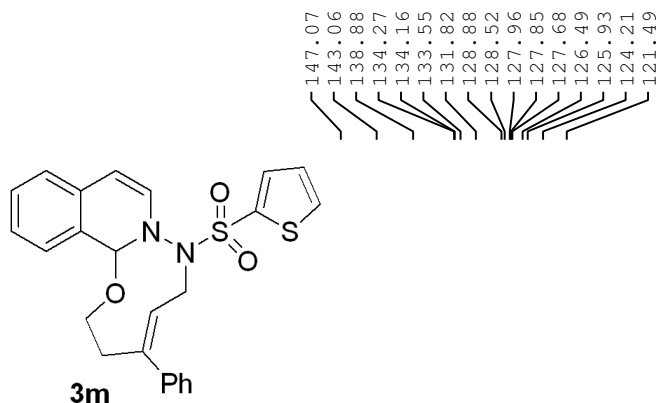

147.07  
143.06  
138.88  
134.27  
134.16  
133.55  
131.82  
128.88  
128.52  
127.96  
127.85  
127.68  
126.49  
125.93  
124.21  
121.49

99.70

88.84

77.57  
77.15  
76.73

63.59

49.58

33.03

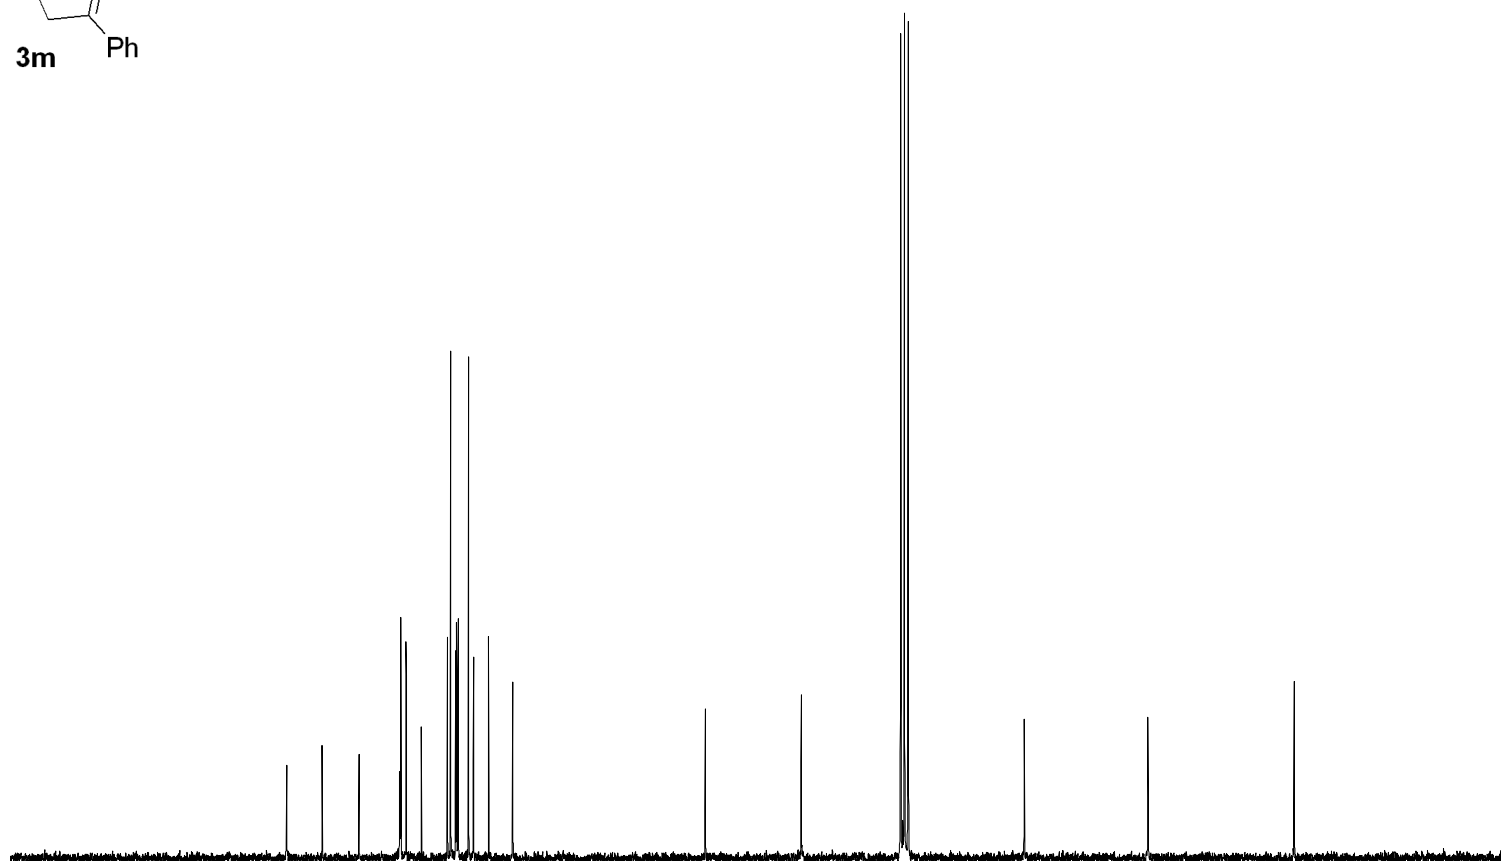

Current Data Parameters  
NAME 2021-4--11Project 1 data  
EXPNO 5425  
PROCNO 1

F2 - Acquisition Parameters  
Date\_ 20210926  
Time 11.49  
INSTRUM spect  
PROBHD 5 mm PABBO BB-  
PULPROG zgpg30  
TD 65536  
SOLVENT CDCl3  
NS 1024  
DS 4  
SWH 18028.846 Hz  
FIDRES 0.275098 Hz  
AQ 1.8175317 sec  
RG 203  
DW 27.733 usec  
DE 6.50 usec  
TE -59.1 K  
D1 2.0000000 sec  
D11 0.0300000 sec  
TD0 1

===== CHANNEL f1 =====  
SFO1 75.4752949 MHz  
NUC1 13C  
P1 9.50 usec  
PLW1 34.2000076 W

===== CHANNEL f2 =====  
SFO2 300.1312005 MHz  
NUC2 1H  
CPDPRG[2] waltz16  
PCPD2 90.00 usec  
PLW2 14.0000000 W  
PLW12 0.17284000 W  
PLW13 0.14000000 W

F2 - Processing parameters  
SI 32768  
SF 75.4677422 MHz  
WDW EM  
SSB 0  
LB 1.00 Hz  
GB 0  
PC 1.40

170 160 150 140 130 120 110 100 90 80 70 60 50 40 30 ppm

3sjwei 5504 xh1-3-10 1h cdcl3

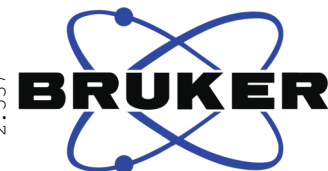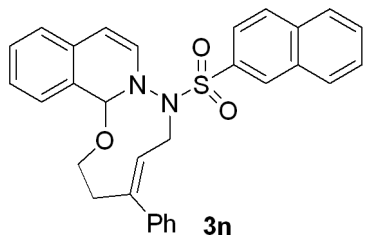

8.347  
7.931  
7.902  
7.837  
7.809  
7.798  
7.769  
7.764  
7.684  
7.663  
7.639  
7.607  
7.581  
7.557  
7.261  
7.132  
7.108  
7.083  
7.039  
7.016  
6.994  
6.069  
6.043  
5.991  
5.965  
5.939  
5.911  
5.374  
5.348  
4.956  
4.927  
4.912  
4.883  
4.617  
4.592  
4.572  
4.548  
3.485  
3.472  
3.465  
3.453  
3.445  
3.433  
3.268  
3.238  
3.206  
3.200  
3.024  
2.978  
2.953  
2.601  
2.586  
2.553  
2.537

Current Data Parameters  
NAME 2021-4--11Project 1 data  
EXPNO 5504  
PROCNO 1

F2 - Acquisition Parameters  
Date\_ 20211010  
Time 9.20  
INSTRUM spect  
PROBHD 5 mm PABBO BB-  
PULPROG zg30  
TD 65536  
SOLVENT CDC13  
NS 16  
DS 2  
SWH 6009.615 Hz  
FIDRES 0.091699 Hz  
AQ 5.4525952 sec  
RG 203  
DW 83.200 usec  
DE 6.50 usec  
TE -59.1 K  
D1 1.00000000 sec  
TD0 1

==== CHANNEL f1 =====  
SFO1 300.1318534 MHz  
NUC1 1H  
P1 10.00 usec  
PLW1 14.00000000 W

F2 - Processing parameters  
SI 65536  
SF 300.1300067 MHz  
WDW EM  
SSB 0  
LB 0.30 Hz  
GB 0  
PC 1.00

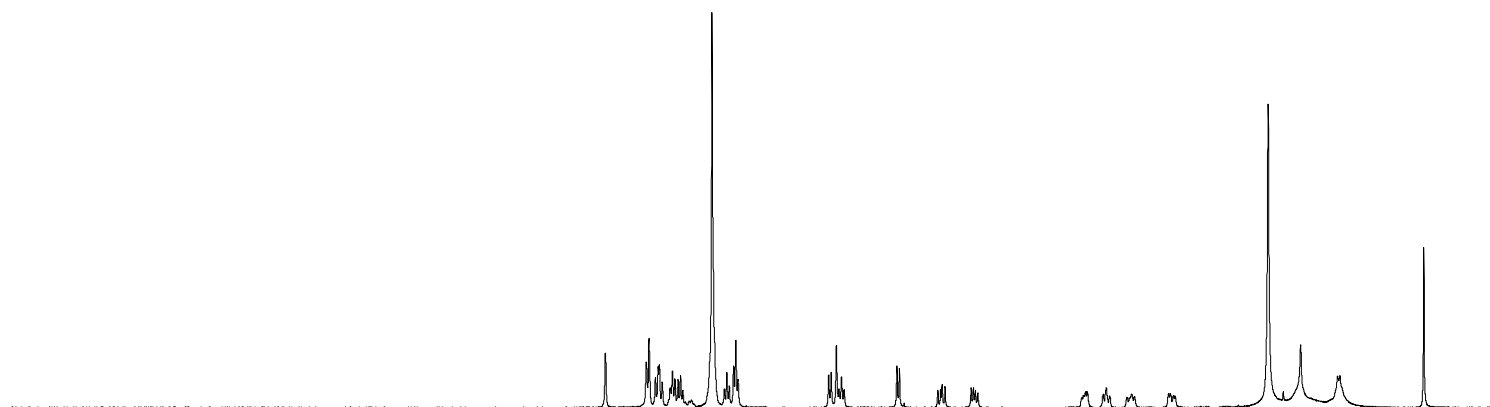

14 13 12 11 10 9 8 7 6 5 4 3 2 1 ppm

1.02  
2.20  
2.23  
3.19  
9.06  
1.21  
2.18  
1.00  
0.98  
1.10  
1.04  
1.01  
1.00  
1.01  
1.03  
0.99  
1.02

3sjwei 5513 xh1-3-10 13c cdcl3

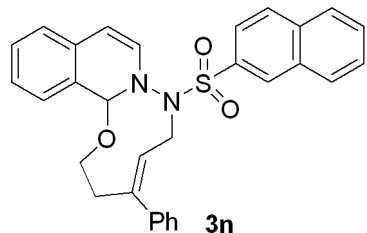

146.85  
143.10  
135.41  
135.17  
134.79  
133.24  
132.27  
132.14  
131.86  
131.78  
130.02  
129.54  
129.24  
128.71  
128.54  
128.49  
127.99  
127.71  
126.49  
125.84  
124.18  
123.09  
121.80

99.60

88.99

77.57  
77.15  
76.73

63.48

49.46

33.07

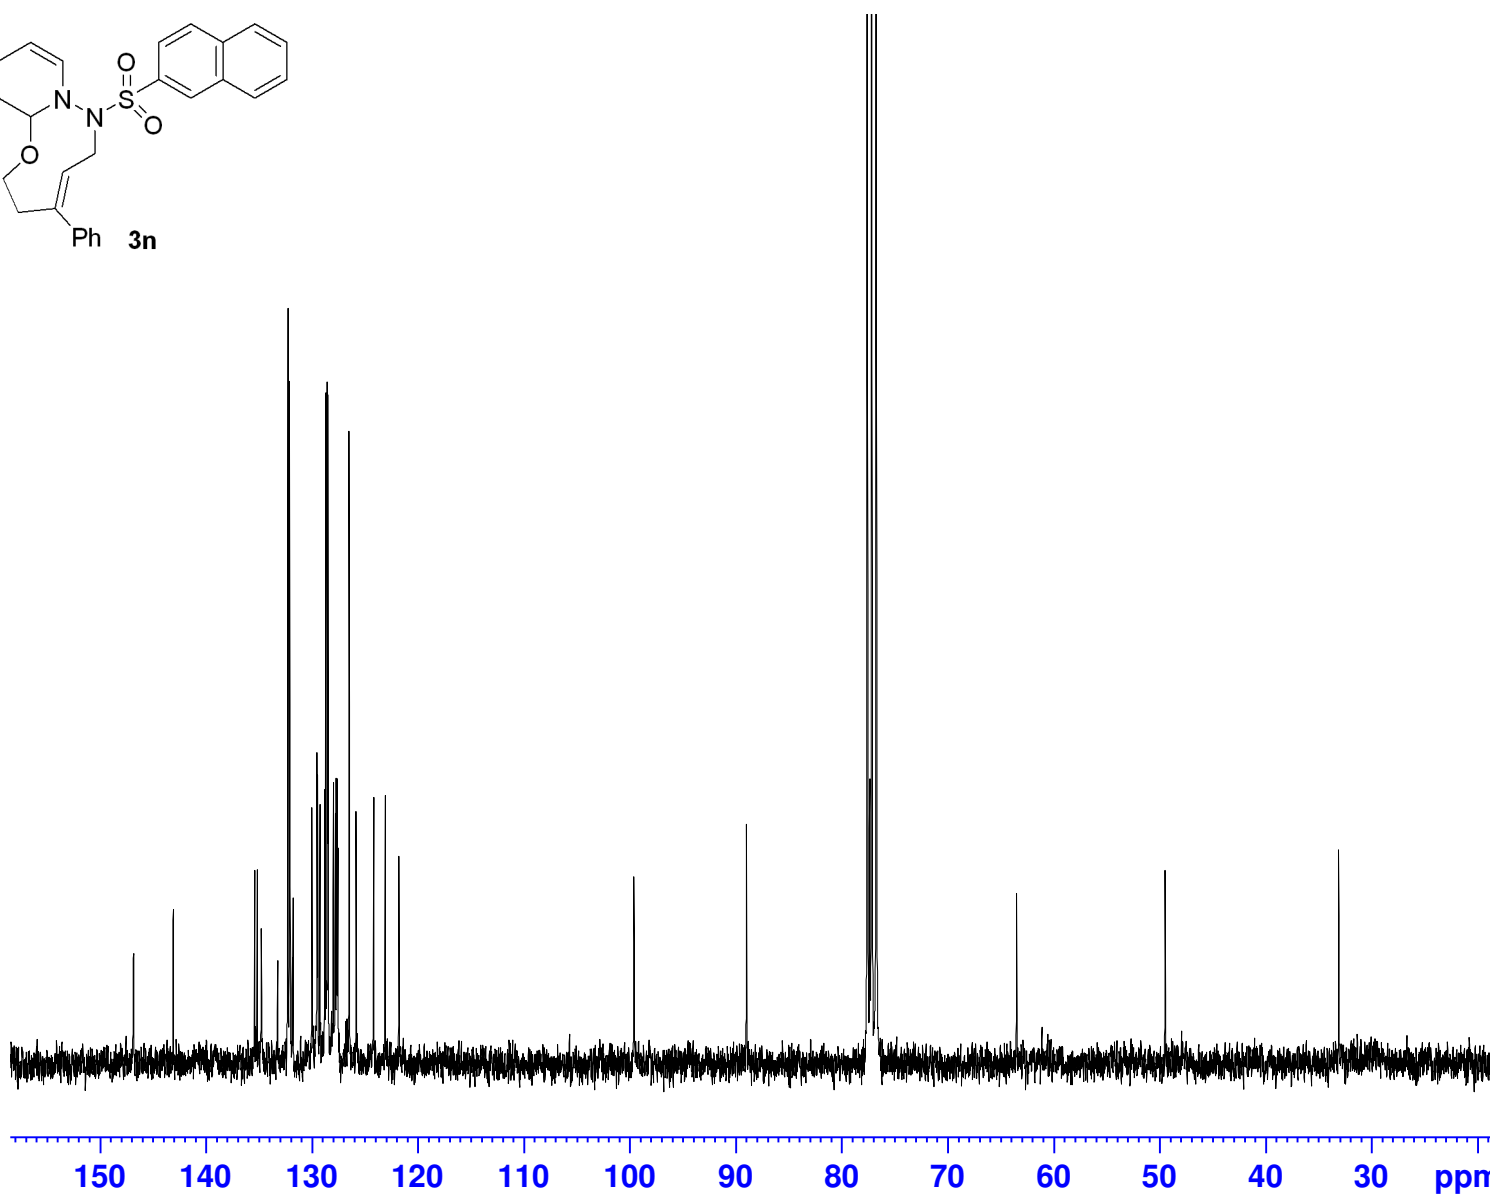

Current Data Parameters  
NAME 2021-4--11Project 1 data  
EXPNO 5513  
PROCNO 1

F2 - Acquisition Parameters  
Date\_ 20211011  
Time 12.27  
INSTRUM spect  
PROBHD 5 mm PABBO BB-  
PULPROG zgpg30  
TD 65536  
SOLVENT CDC13  
NS 1024  
DS 4  
SWH 18028.846 Hz  
FIDRES 0.275098 Hz  
AQ 1.8175317 sec  
RG 203  
DW 27.733 usec  
DE 6.50 usec  
TE -59.1 K  
D1 2.00000000 sec  
D11 0.03000000 sec  
TD0 1

===== CHANNEL f1 =====  
SFO1 75.4752949 MHz  
NUC1 13C  
P1 9.50 usec  
PLW1 34.20000076 W

===== CHANNEL f2 =====  
SFO2 300.1312005 MHz  
NUC2 1H  
CPDPRG[2] waltz16  
PCPD2 90.00 usec  
PLW2 14.00000000 W  
PLW12 0.17284000 W  
PLW13 0.14000000 W

F2 - Processing parameters  
SI 32768  
SF 75.4677421 MHz  
WDW EM  
SSB 0  
LB 1.00 Hz  
GB 0  
PC 1.40



3sjwei 5033 xh1-2-53 1h cdcl3

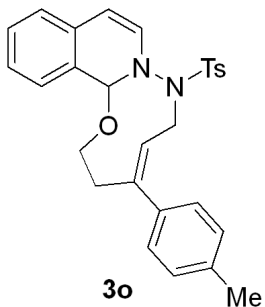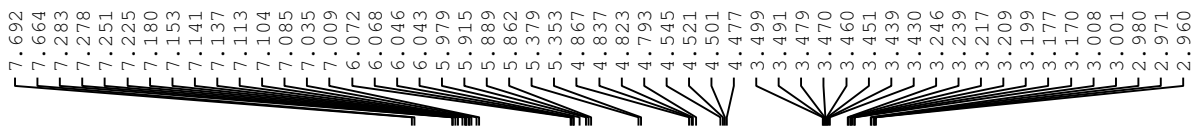

Current Data Parameters  
NAME 2021-4--11Project 1 data  
EXPNO 5033  
PROCNO 1

F2 - Acquisition Parameters  
Date\_ 20210807  
Time 9.09  
INSTRUM spect  
PROBHD 5 mm PABBO BB-  
PULPROG zg30  
TD 65536  
SOLVENT CDC13  
NS 16  
DS 2  
SWH 6009.615 Hz  
FIDRES 0.091699 Hz  
AQ 5.4525952 sec  
RG 144  
DW 83.200 usec  
DE 6.50 usec  
TE 296.2 K  
D1 1.00000000 sec  
TD0 1

==== CHANNEL f1 =====  
SFO1 300.1318534 MHz  
NUC1 1H  
P1 10.00 usec  
PLW1 14.00000000 W

F2 - Processing parameters  
SI 65536  
SF 300.1300099 MHz  
WDW EM  
SSB 0  
LB 0.30 Hz  
GB 0  
PC 1.00

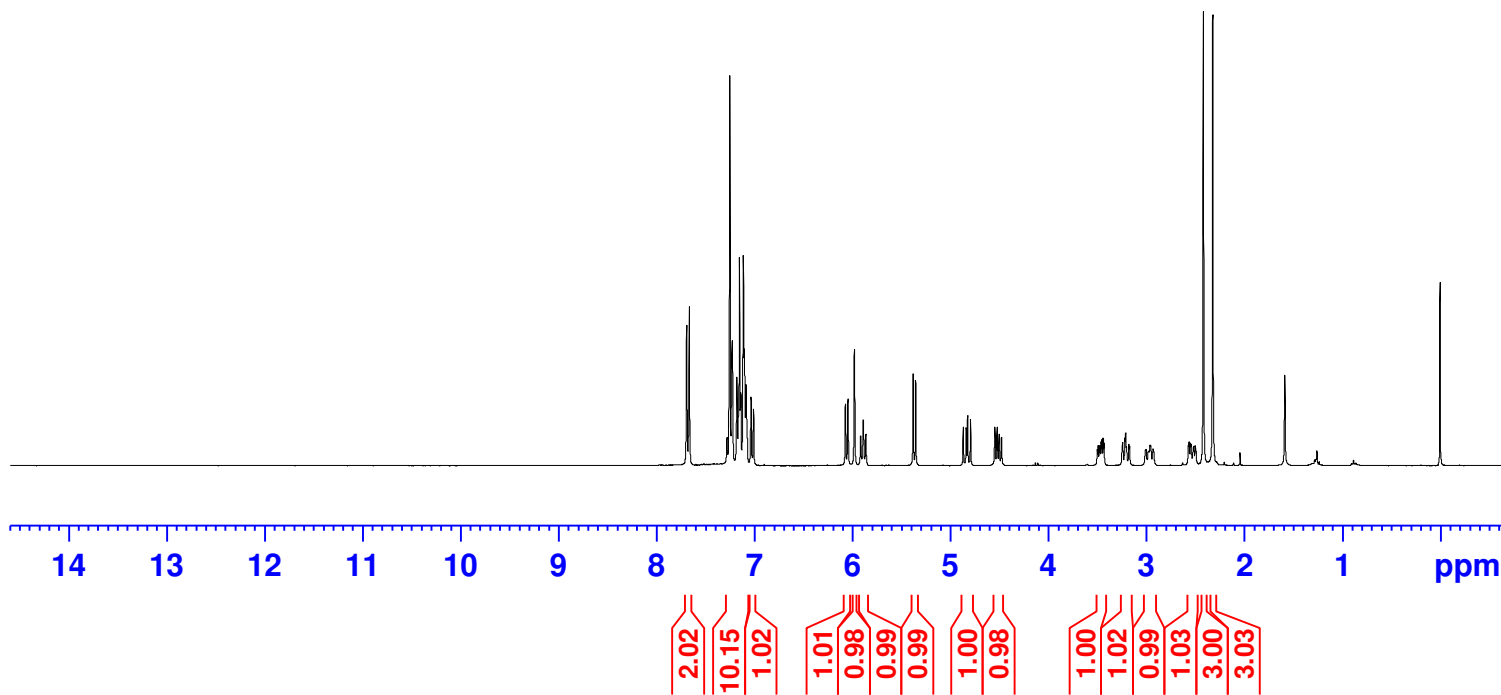

3sjwei 5045 xh1-2-53 13c cdcl3

146.69  
144.37  
140.25  
137.44  
135.75  
135.05  
131.95  
129.90  
129.18  
128.78  
128.27  
127.92  
127.57  
126.38  
125.74  
124.11  
121.13

99.23

88.71

77.57  
77.15  
76.73

63.49

49.35

32.98

21.74  
21.18

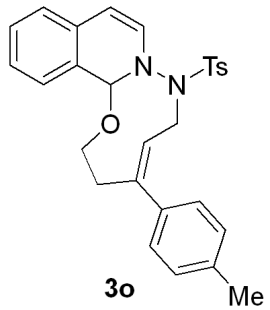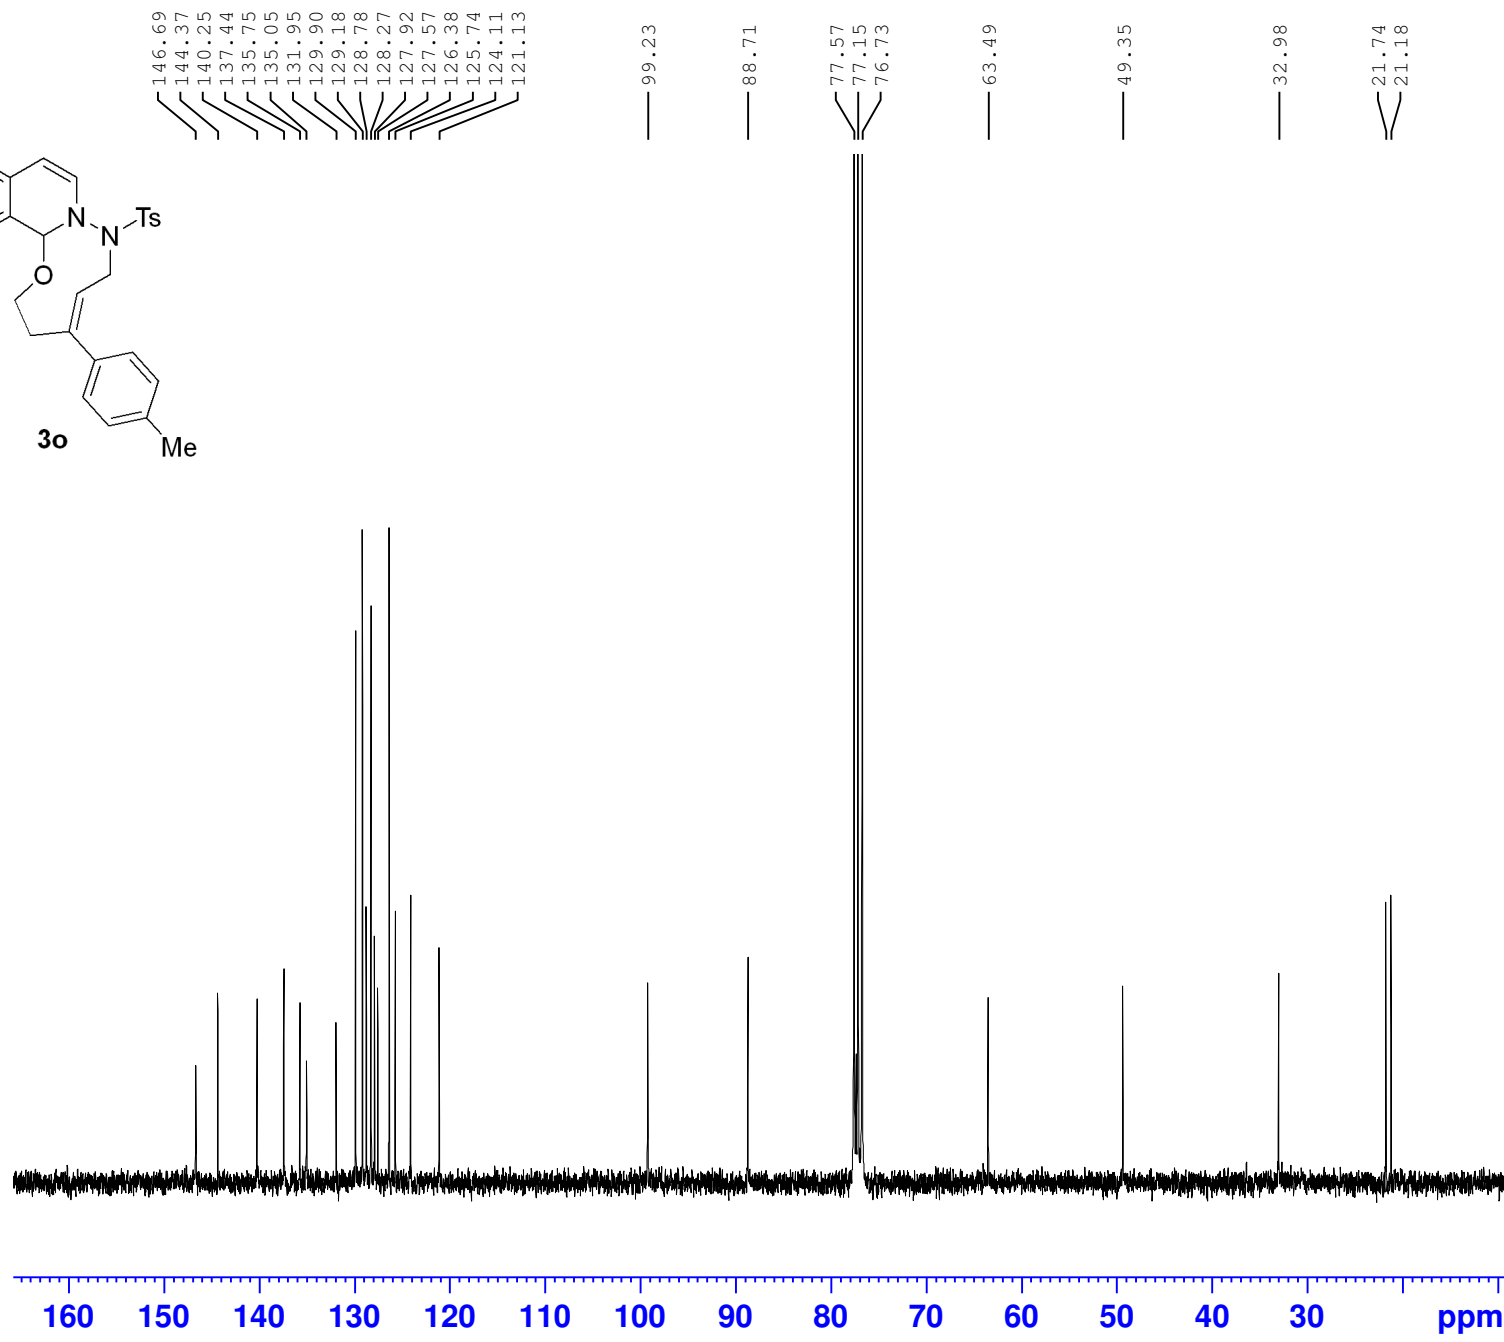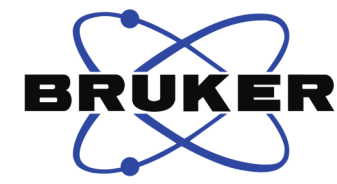

Current Data Parameters  
NAME 2021-4--11Project 1 data  
EXPNO 5045  
PROCNO 1

F2 - Acquisition Parameters  
Date\_ 20210807  
Time 11.01  
INSTRUM spect  
PROBHD 5 mm PABBO BB-  
PULPROG zgpg30  
TD 65536  
SOLVENT CDC13  
NS 800  
DS 4  
SWH 18028.846 Hz  
FIDRES 0.275098 Hz  
AQ 1.8175317 sec  
RG 203  
DW 27.733 usec  
DE 6.50 usec  
TE 296.2 K  
D1 2.0000000 sec  
D11 0.0300000 sec  
TD0 1

===== CHANNEL f1 =====  
SFO1 75.4752949 MHz  
NUC1 13C  
P1 9.50 usec  
PLW1 34.2000076 W

===== CHANNEL f2 =====  
SFO2 300.1312005 MHz  
NUC2 1H  
CPDPRG[2] waltz16  
PCPD2 90.00 usec  
PLW2 14.0000000 W  
PLW12 0.1728400 W  
PLW13 0.1400000 W

F2 - Processing parameters  
SI 32768  
SF 75.4677415 MHz  
WDW EM  
SSB 0  
LB 1.00 Hz  
GB 0  
PC 1.40

3sjwei 5213 xh1-2-74 1h cdcl3

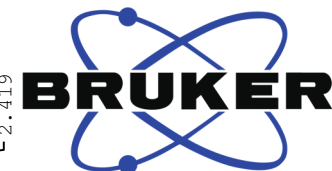

7.691  
7.664  
7.287  
7.281  
7.258  
7.238  
7.228  
7.206  
7.199  
7.189  
7.170  
7.166  
7.144  
7.140  
7.121  
7.117  
7.105  
7.101  
7.080  
7.041  
7.015  
6.853  
6.843  
6.836  
6.820  
6.813  
6.068  
6.064  
6.042  
6.038  
5.969  
5.887  
5.861  
5.834  
5.390  
5.364  
4.857  
4.828  
4.813  
4.783  
4.513  
4.489  
4.468  
4.444  
3.789  
3.495  
3.483  
3.474  
3.464  
3.455  
3.444  
3.435  
3.244  
3.237  
3.216  
3.207  
3.176  
3.168  
2.956  
2.948  
2.574  
2.566  
2.553  
2.546  
2.505  
2.419

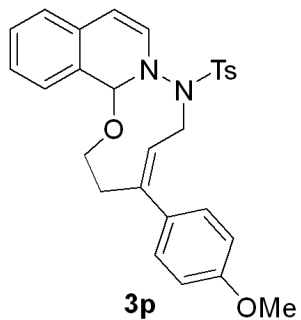

Current Data Parameters  
NAME 2021-4--11Project 1 data  
EXPNO 5213  
PROCNO 1

F2 - Acquisition Parameters  
Date\_ 20210904  
Time 10.00  
INSTRUM spect  
PROBHD 5 mm PABBO BB-  
PULPROG zg30  
TD 65536  
SOLVENT CDC13  
NS 16  
DS 2  
SWH 6009.615 Hz  
FIDRES 0.091699 Hz  
AQ 5.4525952 sec  
RG 181  
DW 83.200 usec  
DE 6.50 usec  
TE -59.1 K  
D1 1.00000000 sec  
TD0 1

==== CHANNEL f1 =====  
SFO1 300.1318534 MHz  
NUC1 1H  
P1 10.00 usec  
PLW1 14.00000000 W

F2 - Processing parameters  
SI 65536  
SF 300.130078 MHz  
WDW EM  
SSB 0  
LB 0.30 Hz  
GB 0  
PC 1.00

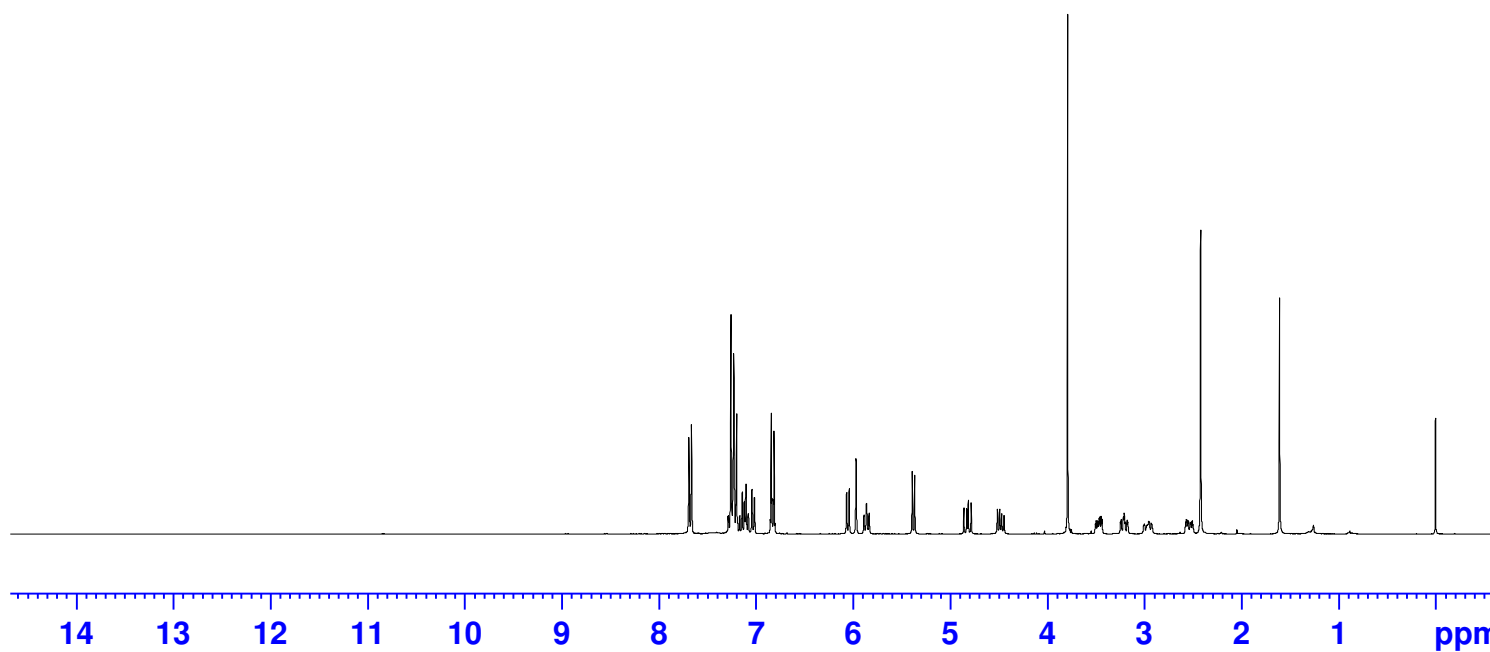

2.04  
5.80  
2.11  
1.03  
2.05  
1.00  
1.00  
1.00  
1.00  
1.01  
1.01  
3.09  
1.03  
1.02  
1.02  
1.03  
3.06

3sjwei 5214 xh1-2-74 13c cdcl3



Current Data Parameters  
NAME 2021-4--11Project 1 data  
EXPNO 5214  
PROCNO 1

F2 - Acquisition Parameters  
Date\_ 20210904  
Time 10.53  
INSTRUM spect  
PROBHD 5 mm PABBO BB-  
PULPROG zgpg30  
TD 65536  
SOLVENT CDCl3  
NS 800  
DS 4  
SWH 18028.846 Hz  
FIDRES 0.275098 Hz  
AQ 1.8175317 sec  
RG 203  
DW 27.733 usec  
DE 6.50 usec  
TE -59.1 K  
D1 2.00000000 sec  
D11 0.03000000 sec  
TD0 1

===== CHANNEL f1 =====  
SFO1 75.4752949 MHz  
NUC1 13C  
P1 9.50 usec  
PLW1 34.20000076 W

===== CHANNEL f2 =====  
SFO2 300.1312005 MHz  
NUC2 1H  
CPDPRG[2] waltz16  
PCPD2 90.00 usec  
PLW2 14.00000000 W  
PLW12 0.17284000 W  
PLW13 0.14000000 W

F2 - Processing parameters  
SI 32768  
SF 75.4677406 MHz  
WDW EM  
SSB 0  
LB 1.00 Hz  
GB 0  
PC 1.40

159.27  
146.20  
144.40  
135.65  
135.43  
134.80  
131.93  
129.90  
128.79  
128.31  
127.92  
127.66  
127.61  
125.76  
124.12  
120.40  
113.86  
99.32  
88.80  
77.57  
77.15  
76.73  
63.45  
55.42  
49.24  
32.93  
21.75

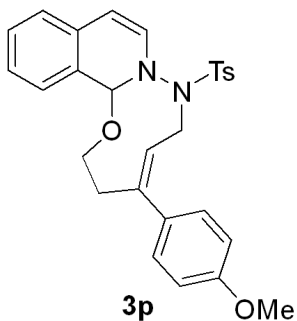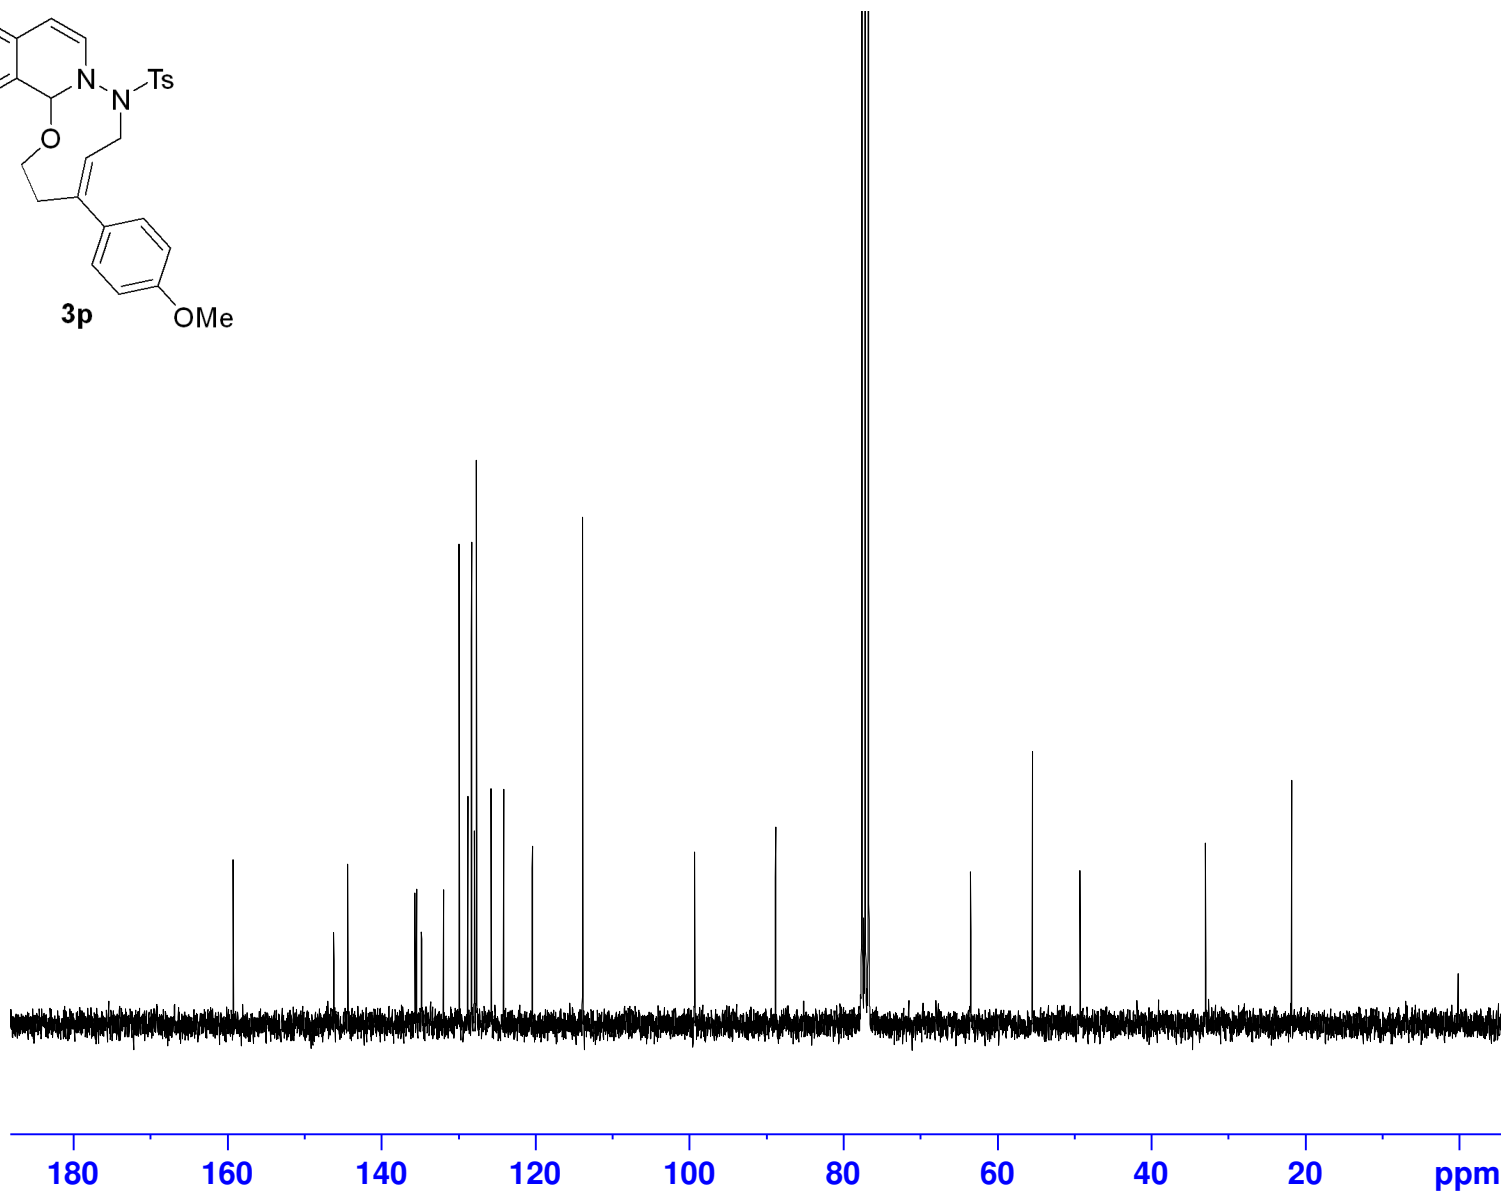

3sjwei 5018 xh1-2-52 1h cdcl3

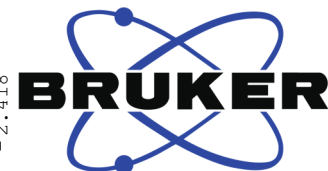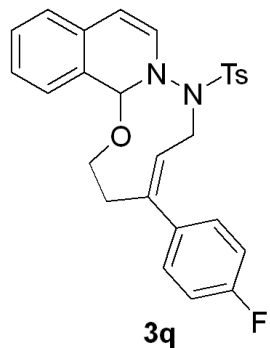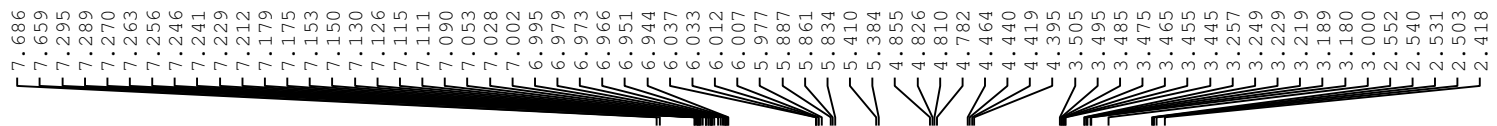

Current Data Parameters  
NAME 2021-4--11Project 1 data  
EXPNO 5018  
PROCNO 1

F2 - Acquisition Parameters  
Date\_ 20210806  
Time 9.13  
INSTRUM spect  
PROBHD 5 mm PABBO BB-  
PULPROG zg30  
TD 65536  
SOLVENT CDC13  
NS 16  
DS 2  
SWH 6009.615 Hz  
FIDRES 0.091699 Hz  
AQ 5.4525952 sec  
RG 144  
DW 83.200 usec  
DE 6.50 usec  
TE 296.1 K  
D1 1.00000000 sec  
TD0 1

==== CHANNEL f1 =====  
SFO1 300.1318534 MHz  
NUC1 1H  
P1 10.00 usec  
PLW1 14.00000000 W

F2 - Processing parameters  
SI 65536  
SF 300.1300080 MHz  
WDW EM  
SSB 0  
LB 0.30 Hz  
GB 0  
PC 1.00

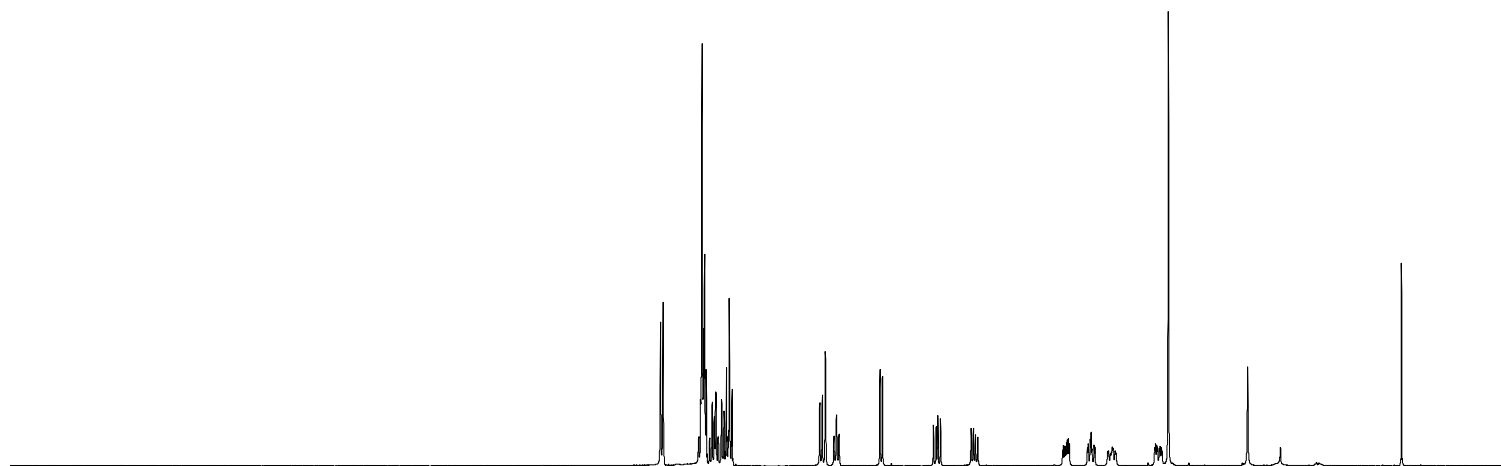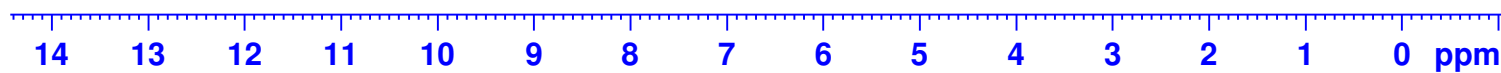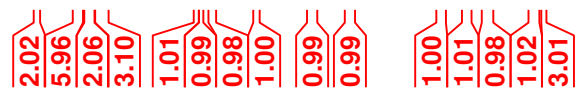

3sjwei 5029 xh1-2-52 13c cdcl3

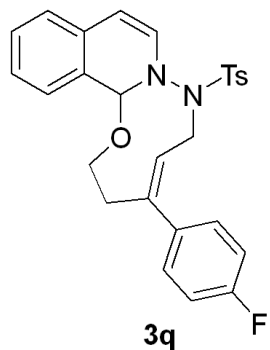

164.05  
160.78  
145.72  
144.51  
139.06  
139.02  
135.36  
134.18  
131.82  
129.92  
128.84  
128.36  
128.22  
128.11  
127.91  
127.62  
125.86  
124.16  
121.79  
115.48  
115.20  
99.54  
89.02  
77.57  
77.15  
76.72  
63.37  
48.88  
33.09  
21.74

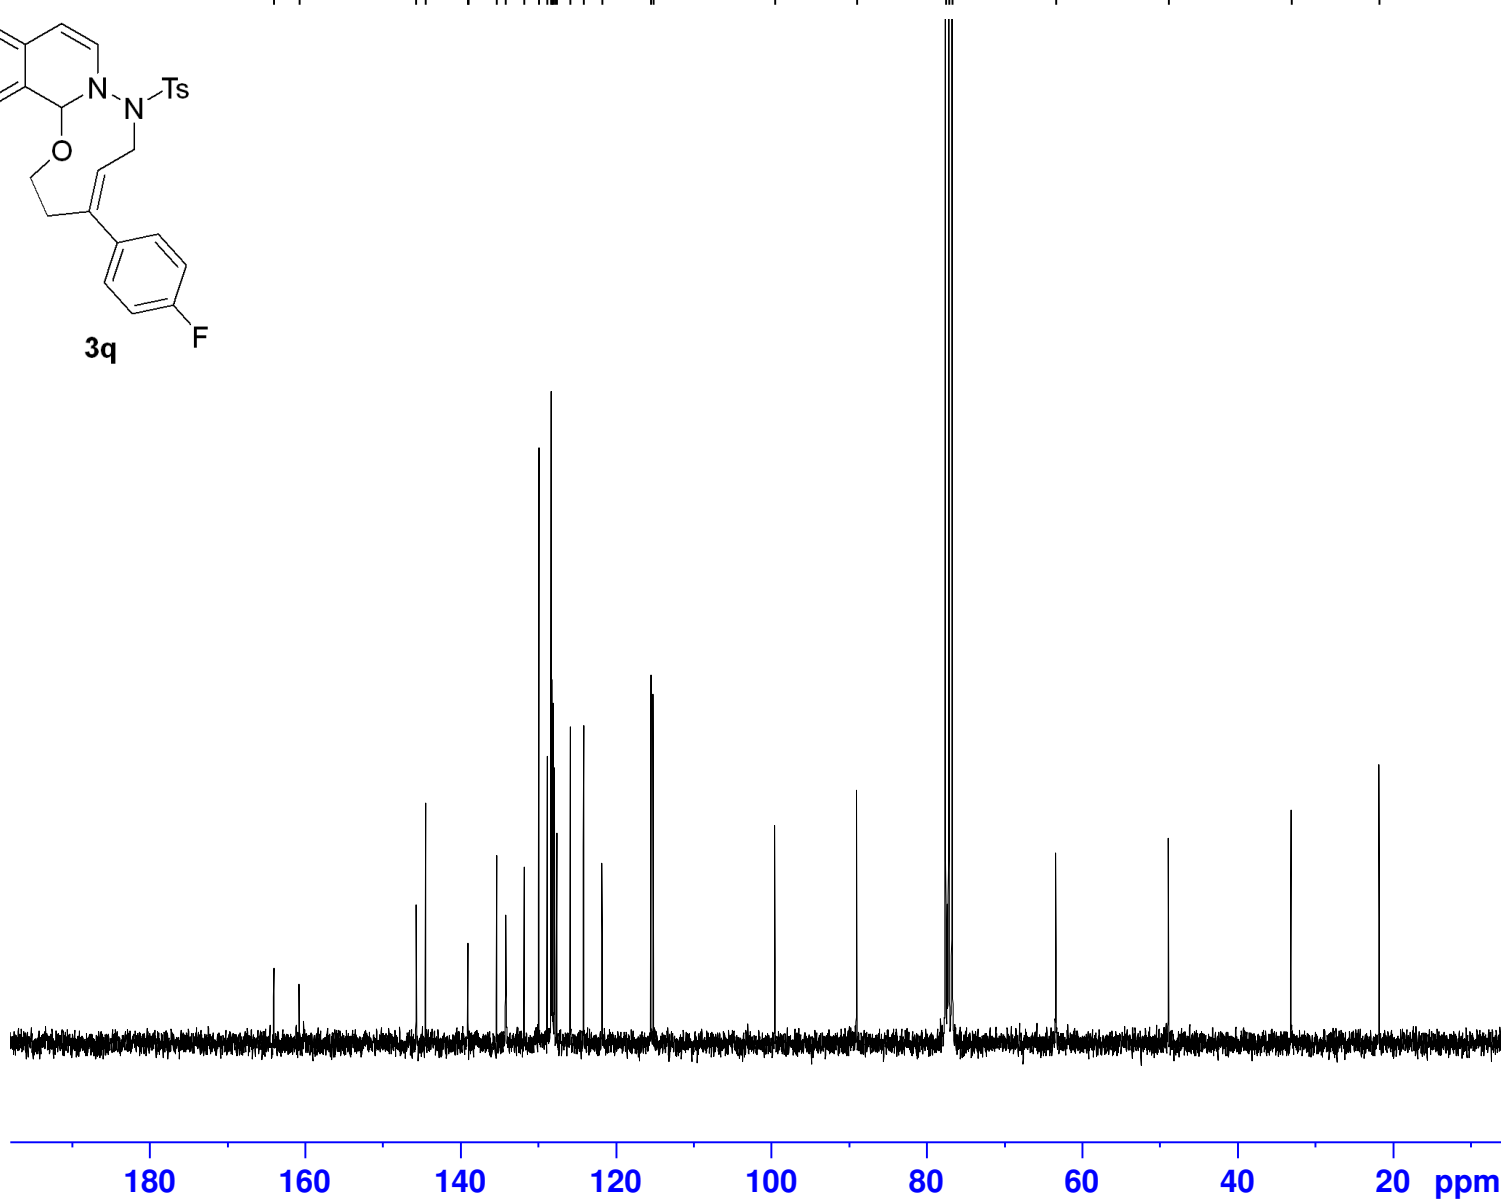

Current Data Parameters  
NAME 2021-4--11Project 1 data  
EXPNO 5029  
PROCNO 1

F2 - Acquisition Parameters  
Date\_ 20210806  
Time 12.37  
INSTRUM spect  
PROBHD 5 mm PABBO BB-  
PULPROG zgpg30  
TD 65536  
SOLVENT CDCl3  
NS 800  
DS 4  
SWH 18028.846 Hz  
FIDRES 0.275098 Hz  
AQ 1.8175317 sec  
RG 203  
DW 27.733 usec  
DE 6.50 usec  
TE 296.2 K  
D1 2.00000000 sec  
D11 0.03000000 sec  
TD0 1

===== CHANNEL f1 =====  
SFO1 75.4752949 MHz  
NUC1 13C  
P1 9.50 usec  
PLW1 34.20000076 W

===== CHANNEL f2 =====  
SFO2 300.1312005 MHz  
NUC2 1H  
CPDPRG[2] waltz16  
PCPD2 90.00 usec  
PLW2 14.00000000 W  
PLW12 0.17284000 W  
PLW13 0.14000000 W

F2 - Processing parameters  
SI 32768  
SF 75.4677411 MHz  
WDW EM  
SSB 0  
LB 1.00 Hz  
GB 0  
PC 1.40

3sjwei 5030 xh1-2-52 19f cdcl3

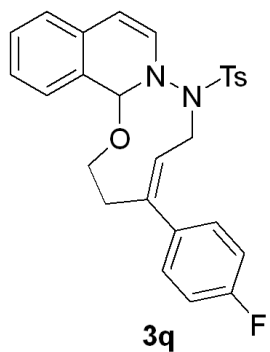

-114.941

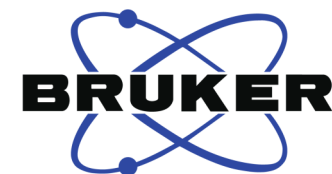

Current Data Parameters  
NAME 0806sjw  
EXPNO 5030  
PROCNO 1

F2 - Acquisition Parameters  
Date\_ 20210806  
Time 12.39  
INSTRUM spect  
PROBHD 5 mm PABBO BB-  
PULPROG zgfhigqn.2  
TD 131072  
SOLVENT CDC13  
NS 16  
DS 4  
SWH 66964.289 Hz  
FIDRES 0.510897 Hz  
AQ 0.9786710 sec  
RG 203  
DW 7.467 usec  
DE 6.50 usec  
TE 296.1 K  
D1 1.00000000 sec  
D11 0.03000000 sec  
D12 0.00002000 sec  
TD0 1

==== CHANNEL f1 =====  
SFO1 282.3761148 MHz  
NUC1 19F  
P1 14.50 usec  
PLW1 10.39999962 W

==== CHANNEL f2 =====  
SFO2 300.1312005 MHz  
NUC2 1H  
CPDPRG[2] waltz16  
PCPD2 90.00 usec  
PLW2 14.00000000 W  
PLW12 0.17284000 W

F2 - Processing parameters  
SI 65536  
SF 282.4043552 MHz  
WDW EM  
SSB 0  
LB 0.30 Hz  
GB 0  
PC 1.00

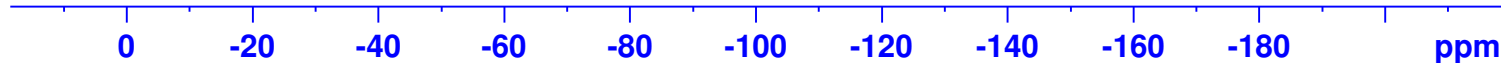

3sjwei 4975 xh1-2-44 1h cdcl3

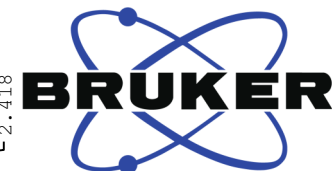

7.685  
7.657  
7.295  
7.290  
7.272  
7.266  
7.257  
7.245  
7.229  
7.217  
7.210  
7.203  
7.188  
7.181  
7.176  
7.154  
7.151  
7.131  
7.127  
7.113  
7.110  
7.088  
7.051  
7.025  
6.025  
6.021  
5.999  
5.995  
5.977  
5.918  
5.892  
5.866  
5.402  
5.376  
4.856  
4.827  
4.811  
4.782  
4.470  
4.446  
4.425  
4.401  
3.504  
3.493  
3.483  
3.474  
3.464  
3.453  
3.444  
3.249  
3.241  
3.221  
3.212  
3.202  
3.181  
3.173  
2.995  
2.986  
2.550  
2.542  
2.530  
2.522  
2.502  
2.493  
2.481  
2.418

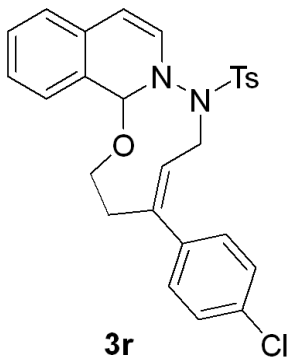

Current Data Parameters  
NAME 2021-4--11Project 1 data  
EXPNO 4975  
PROCNO 1

F2 - Acquisition Parameters  
Date\_ 20210804  
Time 9.09  
INSTRUM spect  
PROBHD 5 mm PABBO BB-  
PULPROG zg30  
TD 65536  
SOLVENT CDC13  
NS 16  
DS 2  
SWH 6009.615 Hz  
FIDRES 0.091699 Hz  
AQ 5.4525952 sec  
RG 144  
DW 83.200 usec  
DE 6.50 usec  
TE 296.1 K  
D1 1.00000000 sec  
TD0 1

==== CHANNEL f1 =====  
SFO1 300.1318534 MHz  
NUC1 1H  
P1 10.00 usec  
PLW1 14.00000000 W

F2 - Processing parameters  
SI 65536  
SF 300.1300082 MHz  
WDW EM  
SSB 0  
LB 0.30 Hz  
GB 0  
PC 1.00

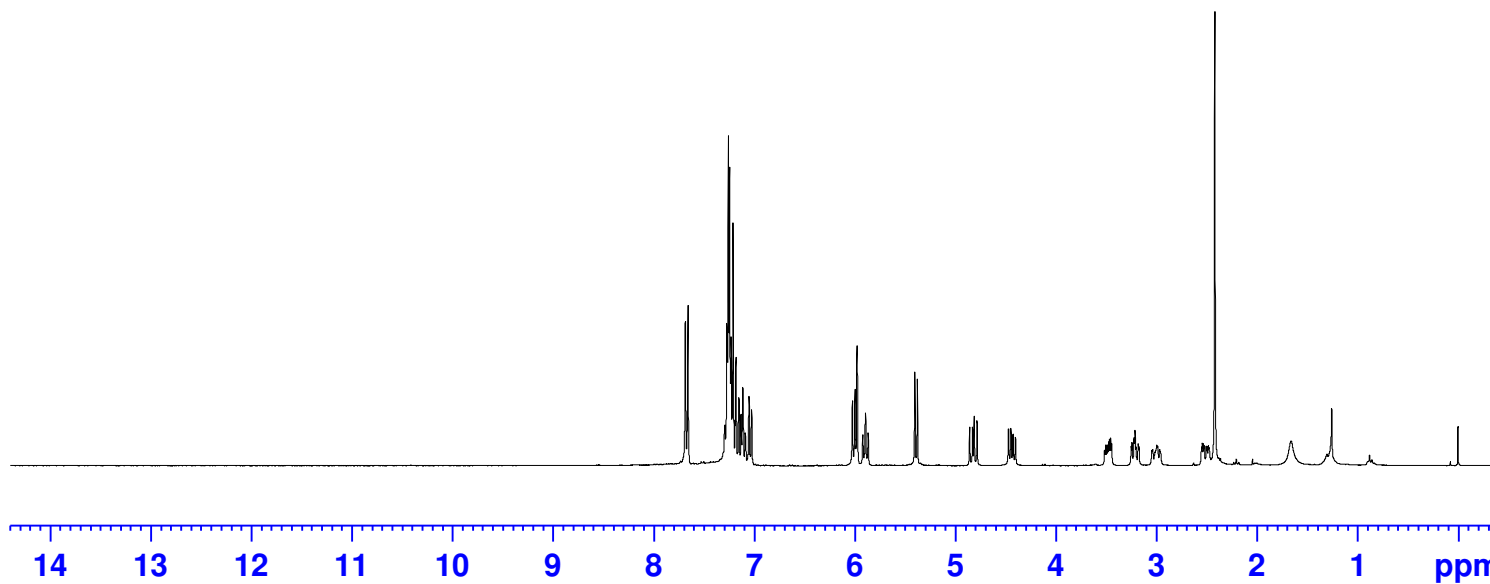

2.08  
7.49  
2.83  
1.03  
2.00  
1.00  
0.99  
0.99  
0.98  
1.00  
1.04  
1.00  
1.04  
3.17



3sjwei 4991 xh1-2-44 13c cdcl3

145.58  
144.54  
141.42  
135.33  
134.16  
133.50  
131.80  
129.93  
128.86  
128.64  
128.34  
127.92  
127.83  
127.57  
125.88  
124.17  
122.30  
99.55  
89.00  
77.57  
77.15  
76.72  
63.35  
48.88  
32.89  
21.74

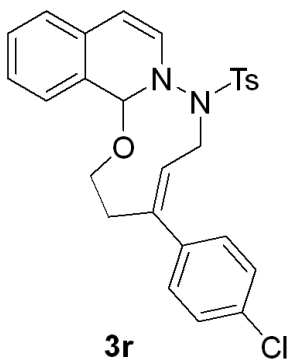

3r

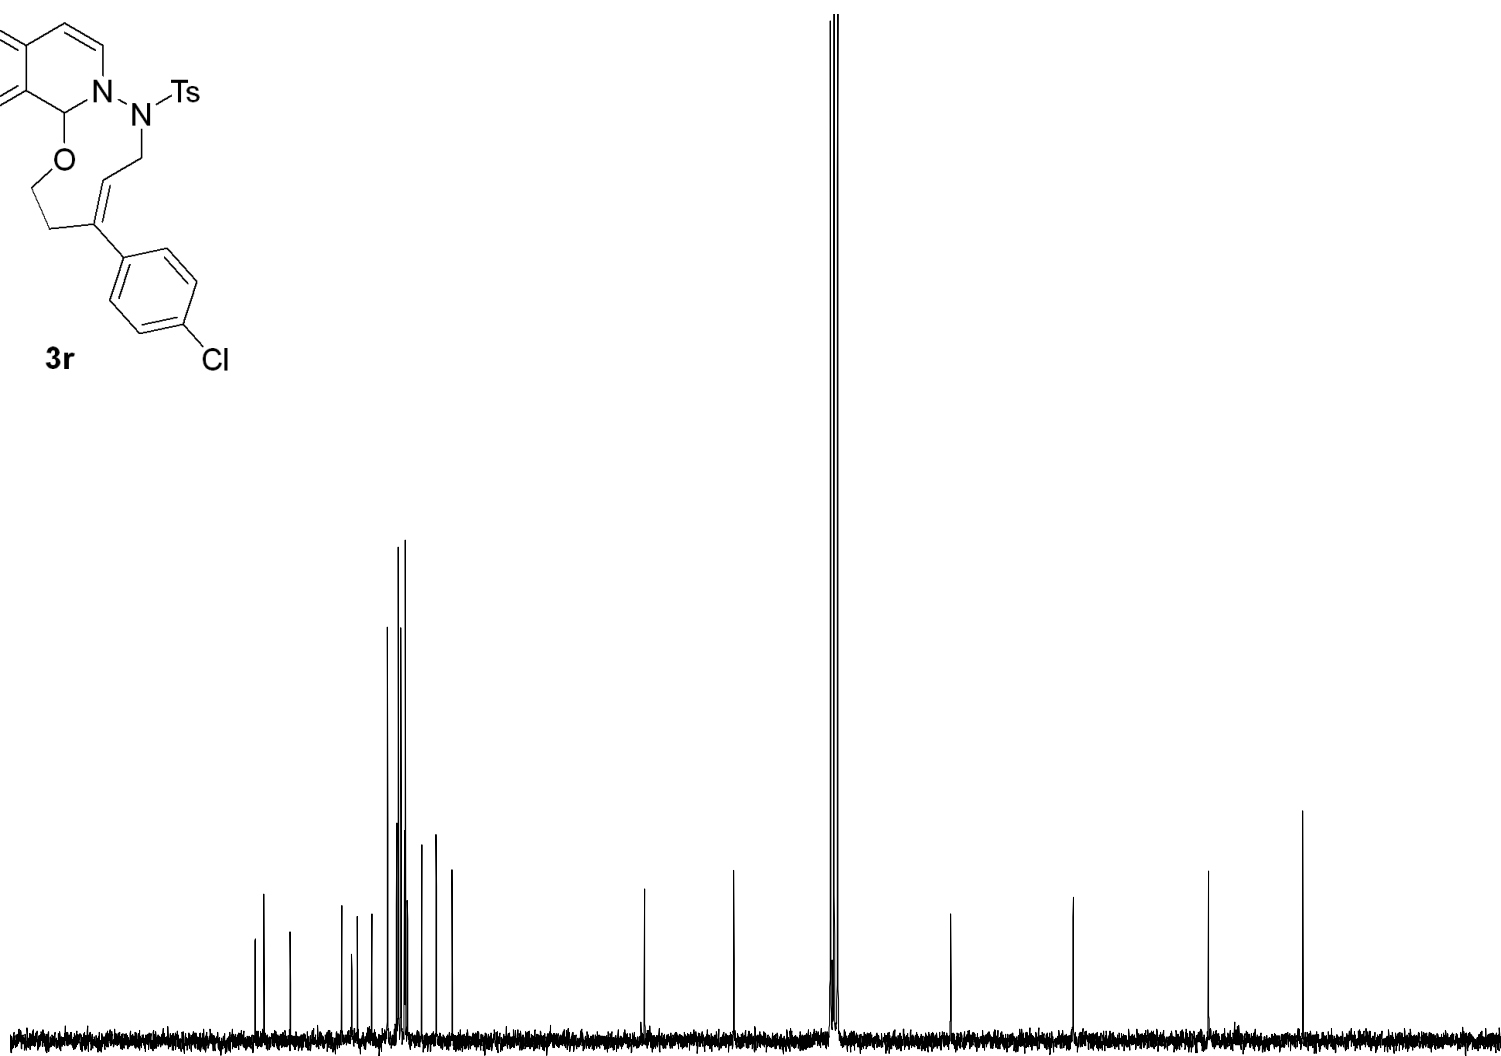

170 160 150 140 130 120 110 100 90 80 70 60 50 40 30 20 ppm



Current Data Parameters  
NAME 2021-4--11Project 1 data  
EXPNO 4991  
PROCNO 1

F2 - Acquisition Parameters  
Date\_ 20210804  
Time 12.44  
INSTRUM spect  
PROBHD 5 mm PABBO BB-  
PULPROG zgpg30  
TD 65536  
SOLVENT CDC13  
NS 700  
DS 4  
SWH 18028.846 Hz  
FIDRES 0.275098 Hz  
AQ 1.8175317 sec  
RG 203  
DW 27.733 usec  
DE 6.50 usec  
TE 296.2 K  
D1 2.00000000 sec  
D11 0.03000000 sec  
TD0 1

===== CHANNEL f1 =====  
SFO1 75.4752949 MHz  
NUC1 13C  
P1 9.50 usec  
PLW1 34.20000076 W

===== CHANNEL f2 =====  
SFO2 300.1312005 MHz  
NUC2 1H  
CPDPRG[2] waltz16  
PCPD2 90.00 usec  
PLW2 14.00000000 W  
PLW12 0.17284000 W  
PLW13 0.14000000 W

F2 - Processing parameters  
SI 32768  
SF 75.4677416 MHz  
WDW EM  
SSB 0  
LB 1.00 Hz  
GB 0  
PC 1.40

3sjwei 4954 xh1-2-48 1h cdcl3

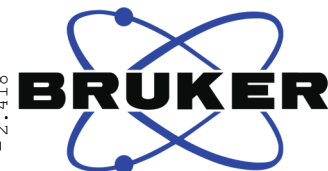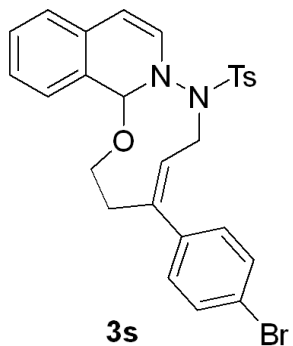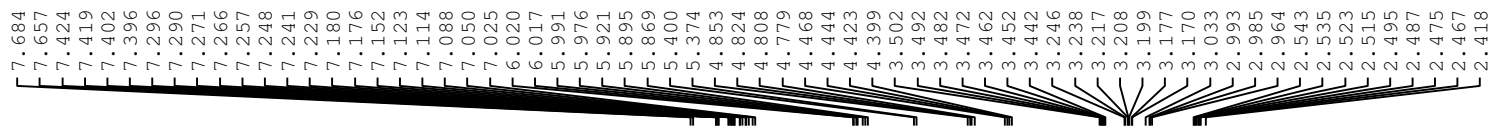

Current Data Parameters  
NAME 2021-4--11Project 1 data  
EXPNO 4954  
PROCNO 1

F2 - Acquisition Parameters  
Date\_ 20210803  
Time 9.27  
INSTRUM spect  
PROBHD 5 mm PABBO BB-  
PULPROG zg30  
TD 65536  
SOLVENT CDC13  
NS 16  
DS 2  
SWH 6009.615 Hz  
FIDRES 0.091699 Hz  
AQ 5.4525952 sec  
RG 144  
DW 83.200 usec  
DE 6.50 usec  
TE 296.2 K  
D1 1.00000000 sec  
TD0 1

==== CHANNEL f1 =====  
SFO1 300.1318534 MHz  
NUC1 1H  
P1 10.00 usec  
PLW1 14.00000000 W

F2 - Processing parameters  
SI 65536  
SF 300.1300079 MHz  
WDW EM  
SSB 0  
LB 0.30 Hz  
GB 0  
PC 1.00

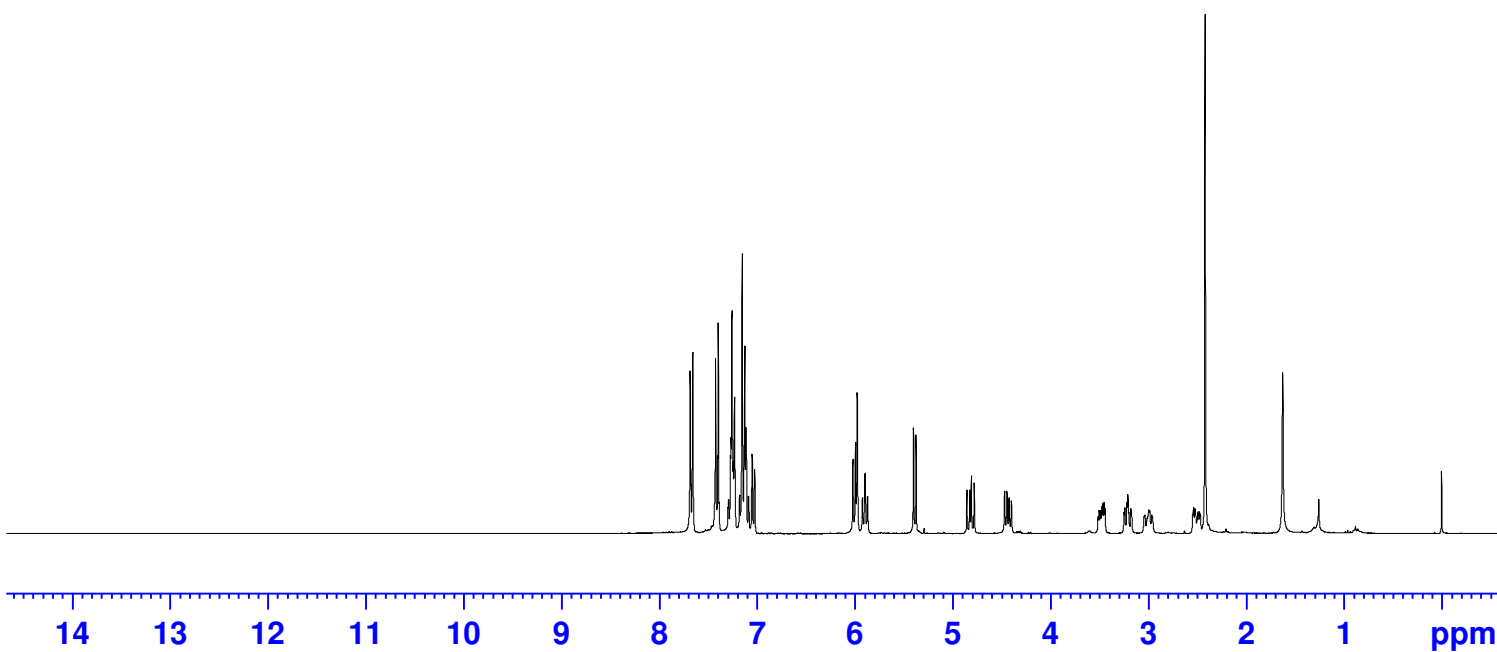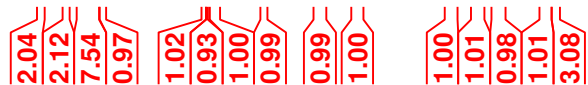

3sjwei 4970 xh1-2-48 13c cdcl3

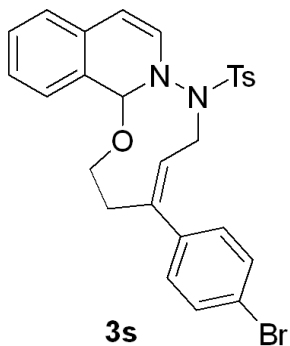

145.63  
144.54  
141.92  
135.33  
134.18  
131.80  
131.60  
129.93  
128.86  
128.34  
128.17  
127.92  
127.56  
125.89  
124.17  
122.36  
121.65

99.55

88.99

77.57  
77.15  
76.73

63.36

48.89

32.85

21.74

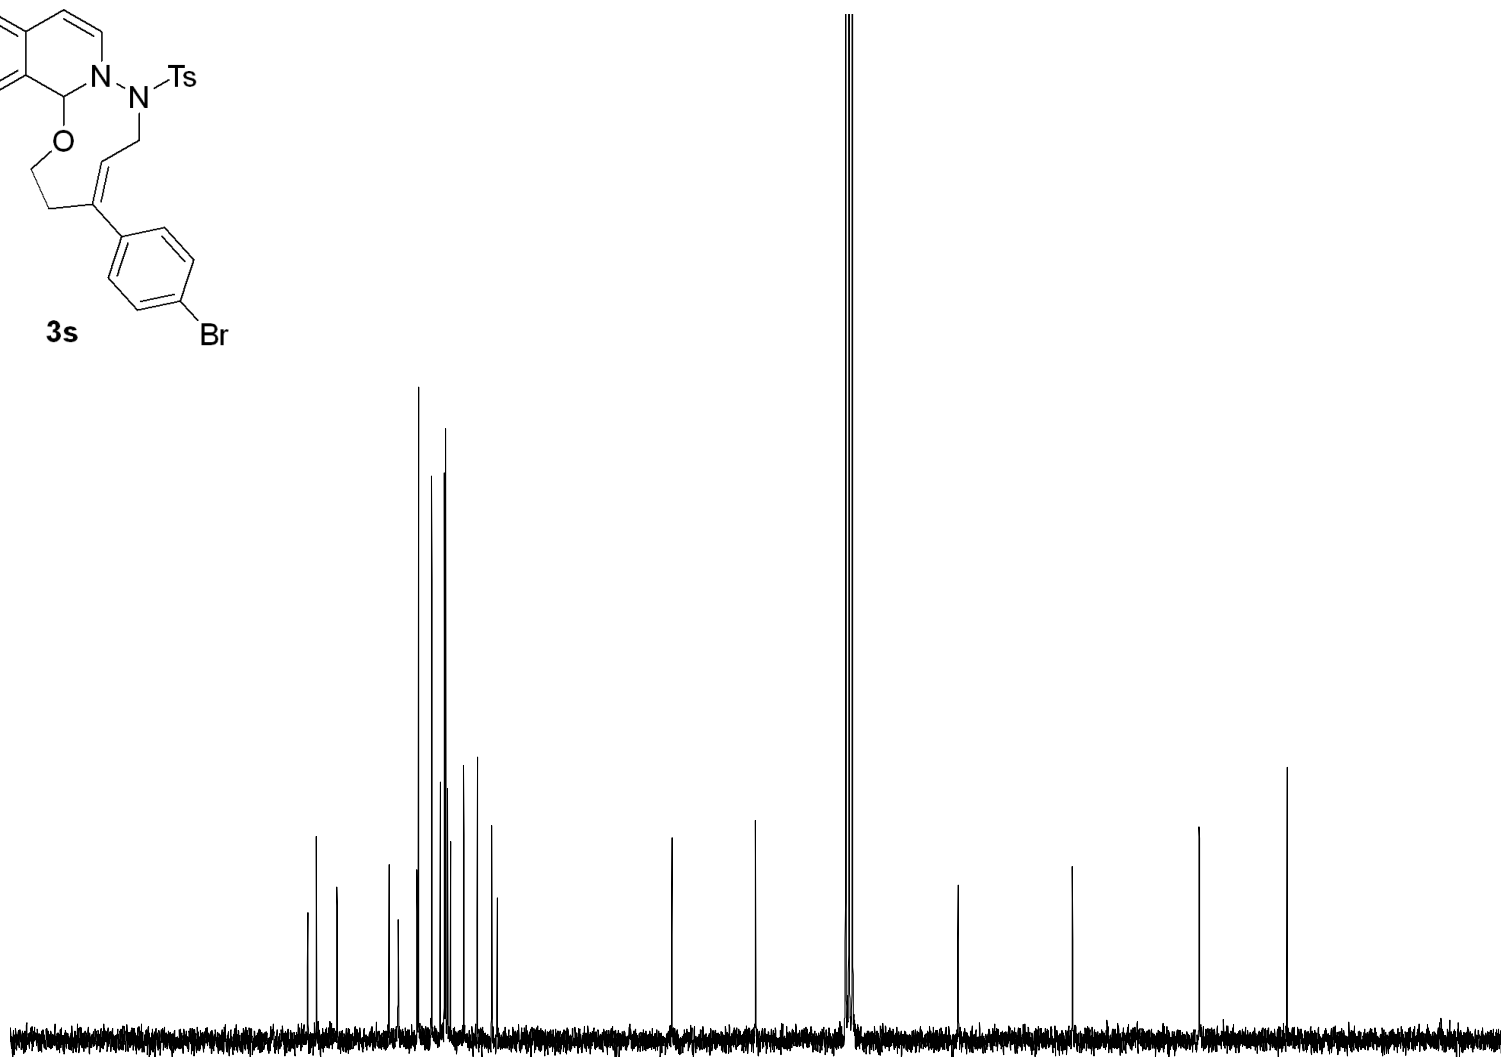

Current Data Parameters  
NAME 2021-4--11Project 1 data  
EXPNO 4970  
PROCNO 1

F2 - Acquisition Parameters  
Date\_ 20210803  
Time 11.35  
INSTRUM spect  
PROBHD 5 mm PABBO BB-  
PULPROG zgpg30  
TD 65536  
SOLVENT CDCl3  
NS 700  
DS 4  
SWH 18028.846 Hz  
FIDRES 0.275098 Hz  
AQ 1.8175317 sec  
RG 203  
DW 27.733 usec  
DE 6.50 usec  
TE 296.2 K  
D1 2.00000000 sec  
D11 0.03000000 sec  
TD0 1

===== CHANNEL f1 =====  
SFO1 75.4752949 MHz  
NUC1 13C  
P1 9.50 usec  
PLW1 34.20000076 W

===== CHANNEL f2 =====  
SFO2 300.1312005 MHz  
NUC2 1H  
CPDPRG[2] waltz16  
PCPD2 90.00 usec  
PLW2 14.00000000 W  
PLW12 0.17284000 W  
PLW13 0.14000000 W

F2 - Processing parameters  
SI 32768  
SF 75.4677415 MHz  
WDW EM  
SSB 0  
LB 1.00 Hz  
GB 0  
PC 1.40

3sjwei 5481 xh1-3-20 1h cdcl3

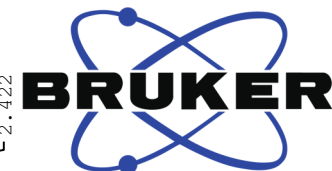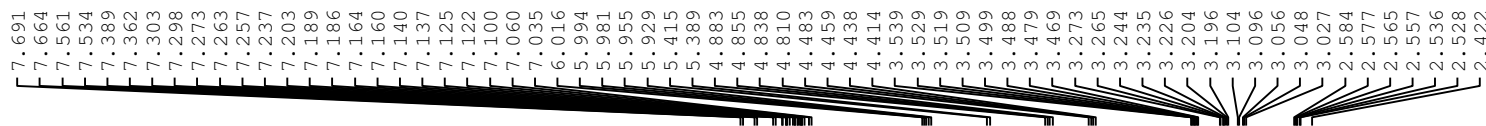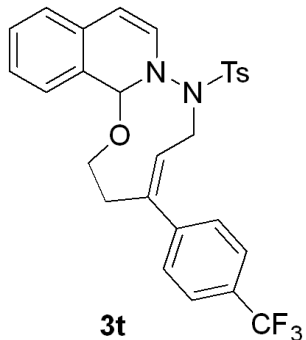

Current Data Parameters  
NAME 2021-4--11Project 1 data  
EXPNO 5481  
PROCNO 1

F2 - Acquisition Parameters  
Date\_ 20210930  
Time 9.16  
INSTRUM spect  
PROBHD 5 mm PABBO BB-  
PULPROG zg30  
TD 65536  
SOLVENT CDC13  
NS 16  
DS 2  
SWH 6009.615 Hz  
FIDRES 0.091699 Hz  
AQ 5.4525952 sec  
RG 144  
DW 83.200 usec  
DE 6.50 usec  
TE -59.1 K  
D1 1.00000000 sec  
TD0 1

==== CHANNEL f1 =====  
SFO1 300.1318534 MHz  
NUC1 1H  
P1 10.00 usec  
PLW1 14.00000000 W

F2 - Processing parameters  
SI 65536  
SF 300.1300082 MHz  
WDW EM  
SSB 0  
LB 0.30 Hz  
GB 0  
PC 1.00

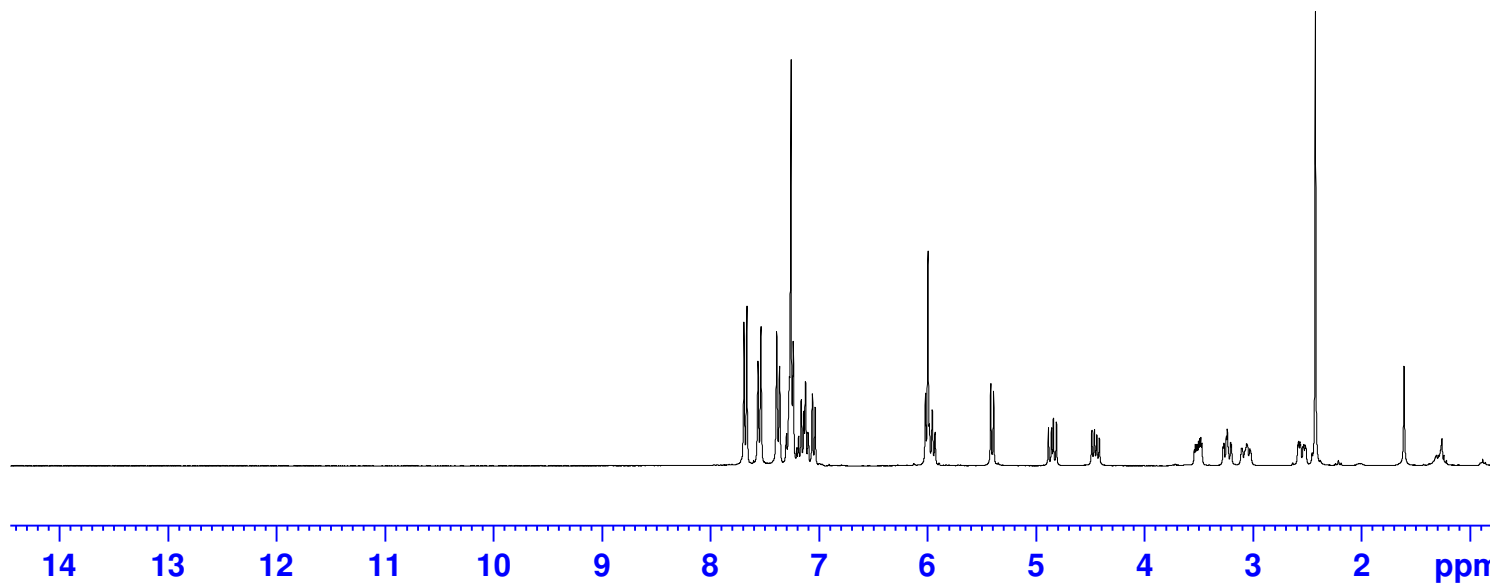

2.02  
2.04  
2.04  
4.35  
2.22  
1.00  
1.92  
1.02  
1.00  
1.00  
0.99  
0.99  
1.01  
0.99  
1.01  
3.02

3sjwei 5497 xh1-3-20 13c cdcl3

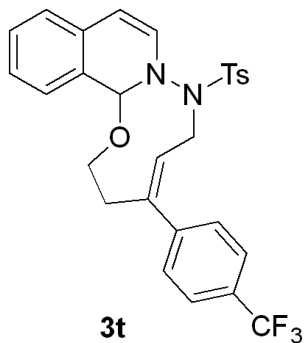

146.62  
145.56  
144.62  
135.22  
133.97  
131.76  
130.29  
129.96  
129.86  
129.43  
128.99  
128.91  
128.37  
127.94  
127.57  
126.84  
125.95  
125.57  
125.52  
125.47  
125.42  
124.21  
123.60  
99.67

89.09

77.57  
77.15  
76.72

63.35

48.79

32.90

21.75

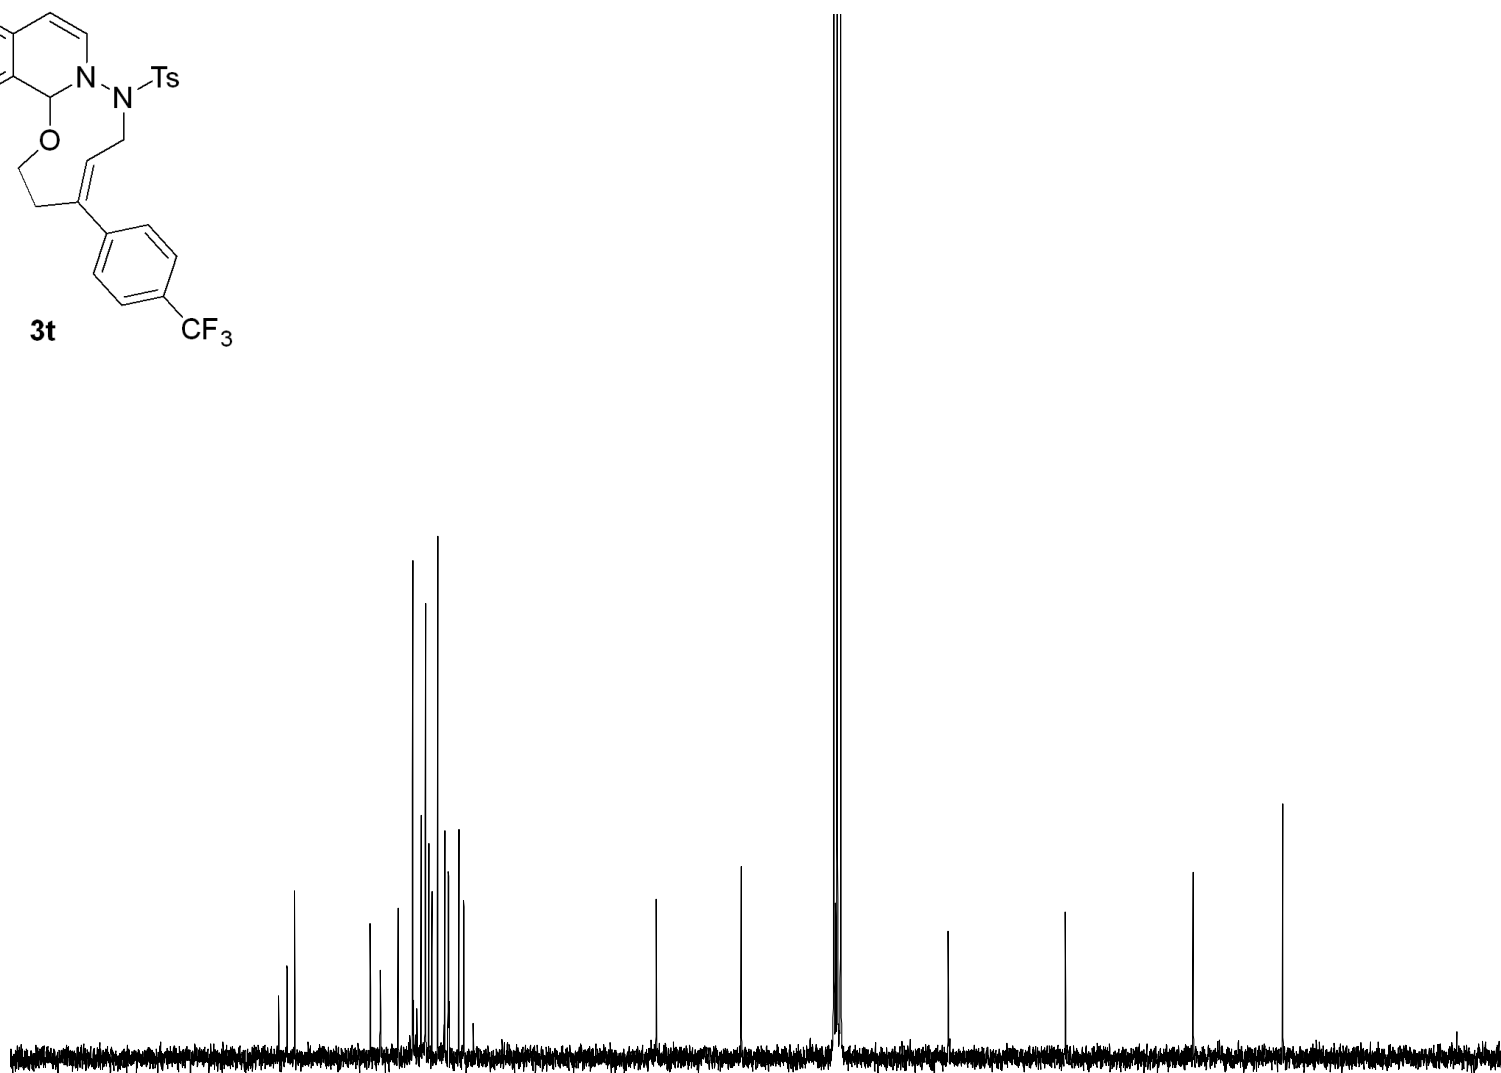

Current Data Parameters  
NAME 2021-4--11Project 1 data  
EXPNO 5497  
PROCNO 1

F2 - Acquisition Parameters  
Date\_ 20210930  
Time 12.46  
INSTRUM spect  
PROBHD 5 mm PABBO BB-  
PULPROG zgpg30  
TD 65536  
SOLVENT CDC13  
NS 600  
DS 4  
SWH 18028.846 Hz  
FIDRES 0.275098 Hz  
AQ 1.8175317 sec  
RG 203  
DW 27.733 usec  
DE 6.50 usec  
TE -59.1 K  
D1 2.00000000 sec  
D11 0.03000000 sec  
TD0 1

===== CHANNEL f1 =====  
SFO1 75.4752949 MHz  
NUC1 13C  
P1 9.50 usec  
PLW1 34.20000076 W

===== CHANNEL f2 =====  
SFO2 300.1312005 MHz  
NUC2 1H  
CPDPRG[2] waltz16  
PCPD2 90.00 usec  
PLW2 14.00000000 W  
PLW12 0.17284000 W  
PLW13 0.14000000 W

F2 - Processing parameters  
SI 32768  
SF 75.4677412 MHz  
WDW EM  
SSB 0  
LB 1.00 Hz  
GB 0  
PC 1.40

170 160 150 140 130 120 110 100 90 80 70 60 50 40 30 20 10 ppm

3sjwei 5498 xh1-3-20 19fcdcl3

— -62.514

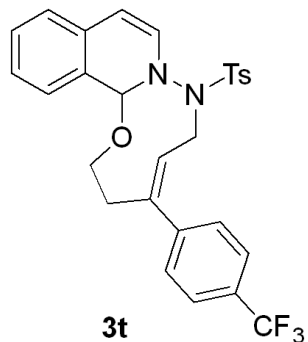

3t



Current Data Parameters  
NAME 0930sjw  
EXPNO 5498  
PROCNO 1

F2 - Acquisition Parameters  
Date\_ 20210930  
Time 12.48  
INSTRUM spect  
PROBHD 5 mm PABBO BB-  
PULPROG zgfhigqn.2  
TD 131072  
SOLVENT CDCl3  
NS 16  
DS 4  
SWH 66964.289 Hz  
FIDRES 0.510897 Hz  
AQ 0.9786710 sec  
RG 203  
DW 7.467 usec  
DE 6.50 usec  
TE -59.1 K  
D1 1.00000000 sec  
D11 0.03000000 sec  
D12 0.00002000 sec  
TD0 1

==== CHANNEL f1 =====  
SFO1 282.3761148 MHz  
NUC1 19F  
P1 14.50 usec  
PLW1 10.39999962 W

==== CHANNEL f2 =====  
SFO2 300.1312005 MHz  
NUC2 1H  
CPDPRG[2] waltz16  
PCPD2 90.00 usec  
PLW2 14.00000000 W  
PLW12 0.17284000 W

F2 - Processing parameters  
SI 65536  
SF 282.4043552 MHz  
WDW EM  
SSB 0  
LB 0.30 Hz  
GB 0  
PC 1.00

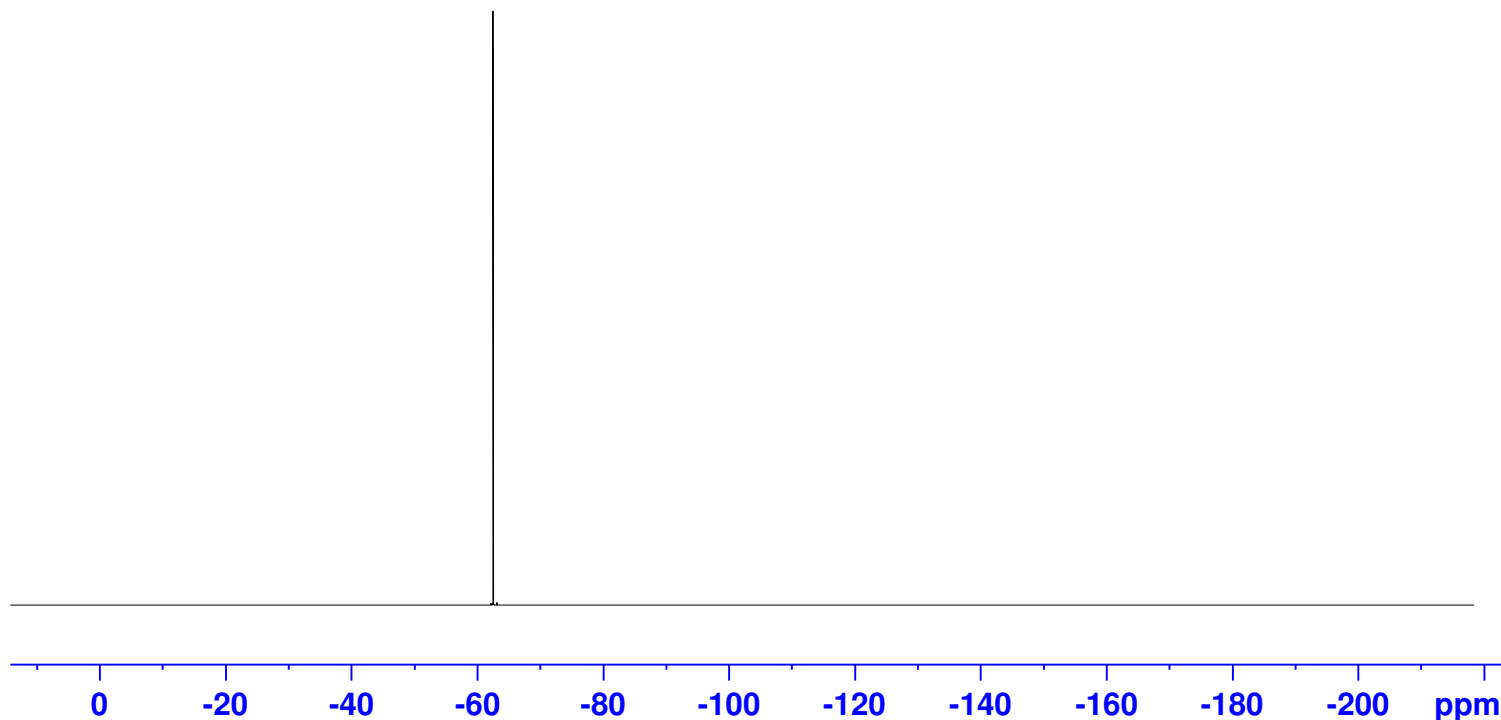

3sjwei 5502 xh1-3-4 1h cdcl3

7.691  
7.663  
7.233  
7.213  
7.204  
7.180  
7.156  
7.132  
7.114  
7.094  
7.072  
7.046  
7.021  
6.993  
6.986  
6.957  
6.116  
6.091  
5.999  
5.872  
5.845  
5.818  
5.443  
5.417  
4.889  
4.860  
4.845  
4.815  
4.564  
4.540  
4.519  
4.495  
3.476  
3.468  
3.457  
3.448  
3.436  
3.428  
3.417  
3.408  
3.310  
3.279  
3.246  
3.004  
2.972  
2.959  
2.931  
2.463  
2.425

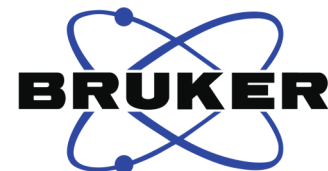

Current Data Parameters  
NAME 2021-4--11Project 1 data  
EXPNO 5502  
PROCNO 1

F2 - Acquisition Parameters  
Date\_ 20211010  
Time 9.09  
INSTRUM spect  
PROBHD 5 mm PABBO BB-  
PULPROG zg30  
TD 65536  
SOLVENT CDC13  
NS 16  
DS 2  
SWH 6009.615 Hz  
FIDRES 0.091699 Hz  
AQ 5.4525952 sec  
RG 181  
DW 83.200 usec  
DE 6.50 usec  
TE -59.1 K  
D1 1.00000000 sec  
TD0 1

==== CHANNEL f1 =====  
SFO1 300.1318534 MHz  
NUC1 1H  
P1 10.00 usec  
PLW1 14.00000000 W

F2 - Processing parameters  
SI 65536  
SF 300.1300073 MHz  
WDW EM  
SSB 0  
LB 0.30 Hz  
GB 0  
PC 1.00

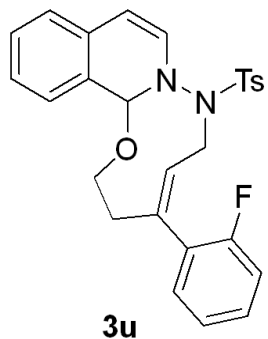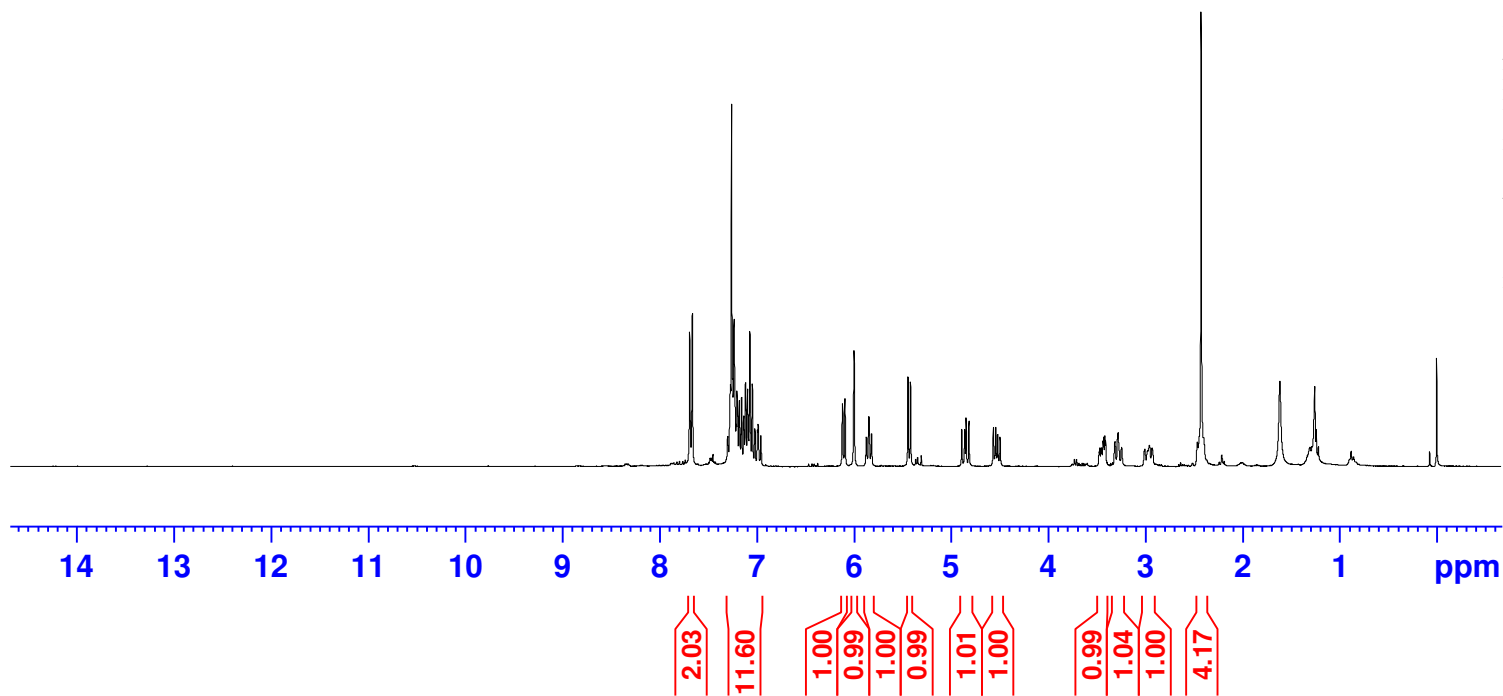

3sjwei 5511 xh1-3-4 13c cdcl3



Current Data Parameters  
NAME 2021-4--11Project 1 data  
EXPNO 5511  
PROCNO 1

F2 - Acquisition Parameters  
Date\_ 20211009  
Time 13.26  
INSTRUM spect  
PROBHD 5 mm PABBO BB-  
PULPROG zgpg30  
TD 65536  
SOLVENT CDCl3  
NS 1500  
DS 4  
SWH 18028.846 Hz  
FIDRES 0.275098 Hz  
AQ 1.8175317 sec  
RG 203  
DW 27.733 usec  
DE 6.50 usec  
TE -59.1 K  
D1 2.00000000 sec  
D11 0.03000000 sec  
TDO 1

===== CHANNEL f1 =====  
SFO1 75.4752949 MHz  
NUC1 13C  
P1 9.50 usec  
PLW1 34.20000076 W

===== CHANNEL f2 =====  
SFO2 300.1312005 MHz  
NUC2 1H  
CPDPRG[2] waltz16  
PCPD2 90.00 usec  
PLW2 14.00000000 W  
PLW12 0.17284000 W  
PLW13 0.14000000 W

F2 - Processing parameters  
SI 32768  
SF 75.4677402 MHz  
WDW EM  
SSB 0  
LB 1.00 Hz  
GB 0  
PC 1.40

161.33  
158.06  
144.46  
143.41  
135.66  
135.22  
131.92  
131.76  
131.57  
130.45  
130.40  
129.94  
129.30  
129.19  
128.84  
128.29  
127.85  
127.57  
125.80  
124.89  
124.27  
124.22  
115.92  
115.62  
99.38  
88.67  
77.57  
77.15  
76.73  
63.37  
49.23  
33.65  
21.76

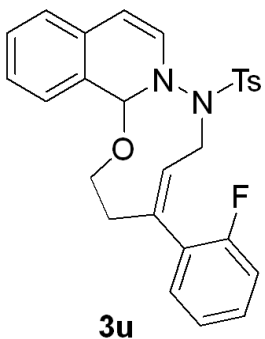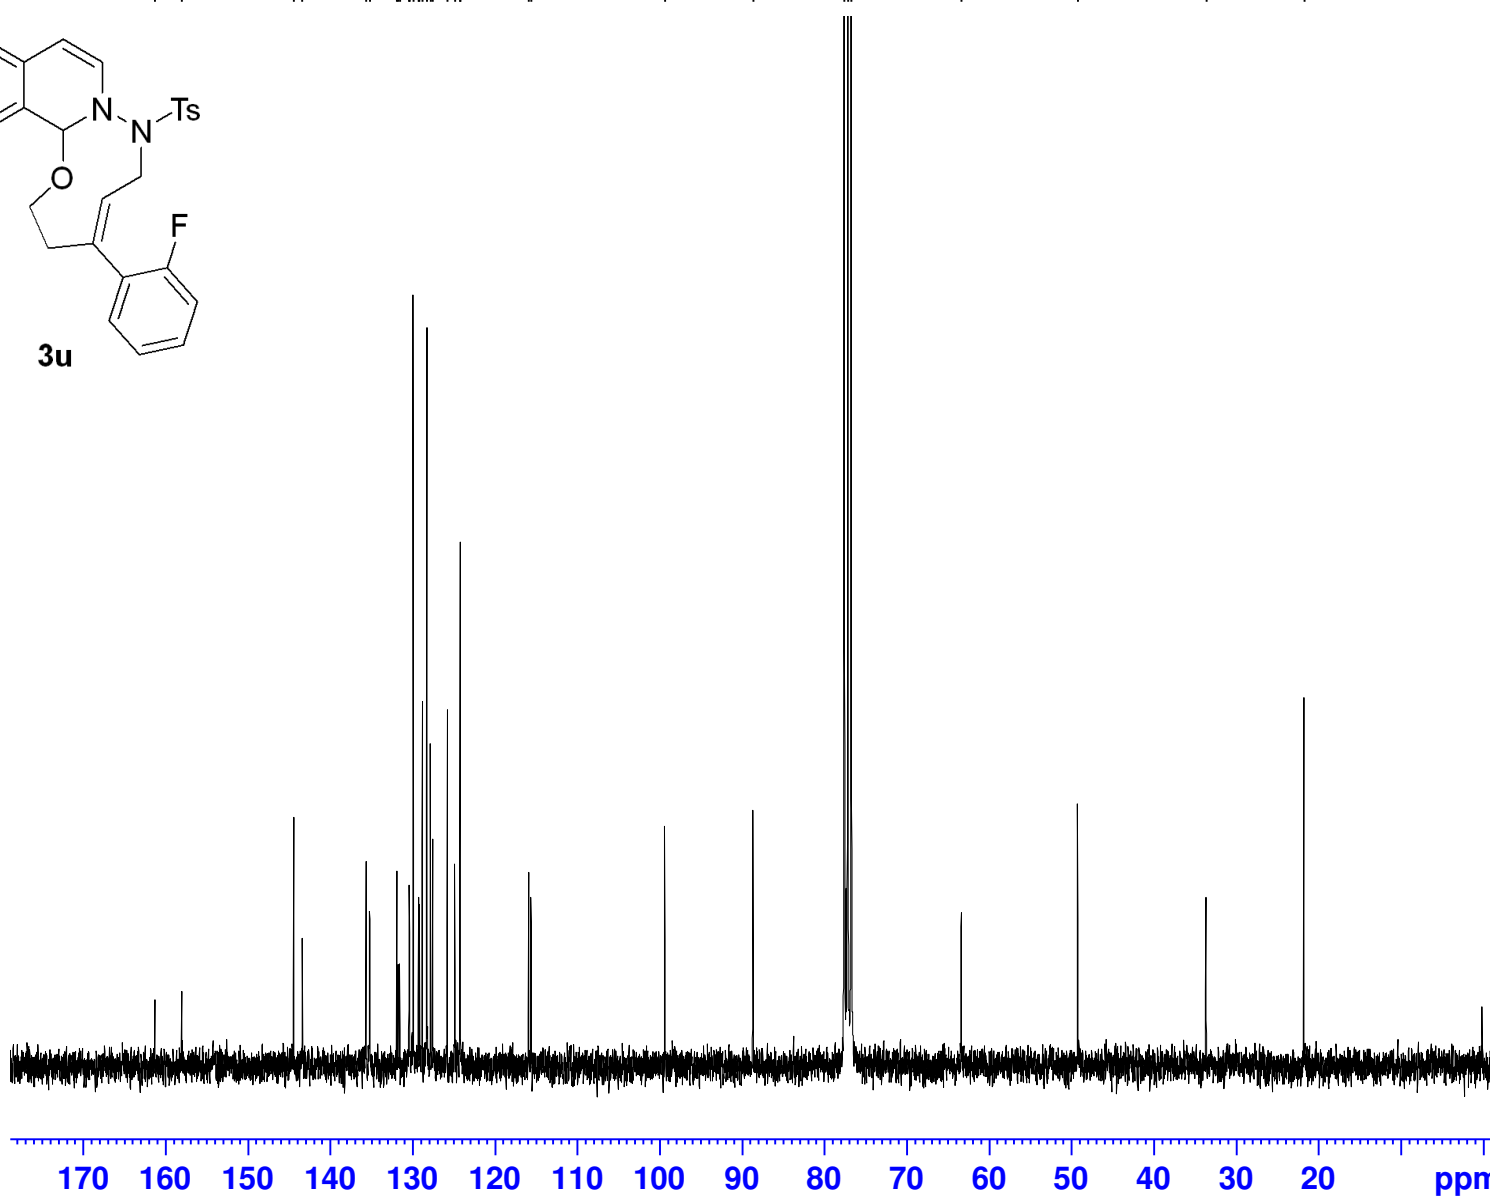



3sjwei 5509 xhl-3-4 19f cdcl3

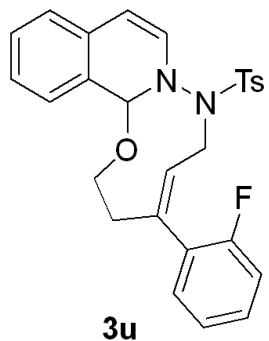

-114.359



Current Data Parameters  
NAME 211009sjw  
EXPNO 5509  
PROCNO 1

F2 - Acquisition Parameters  
Date\_ 20211009  
Time 9.22  
INSTRUM spect  
PROBHD 5 mm PABBO BB-  
PULPROG zgfhigqn.2  
TD 131072  
SOLVENT CDCl3  
NS 16  
DS 4  
SWH 66964.289 Hz  
FIDRES 0.510897 Hz  
AQ 0.9786710 sec  
RG 203  
DW 7.467 usec  
DE 6.50 usec  
TE -59.1 K  
D1 1.00000000 sec  
D11 0.03000000 sec  
D12 0.00002000 sec  
TD0 1

==== CHANNEL f1 =====  
SFO1 282.3761148 MHz  
NUC1 19F  
P1 14.50 usec  
PLW1 10.39999962 W

==== CHANNEL f2 =====  
SFO2 300.1312005 MHz  
NUC2 1H  
CPDPRG[2] waltz16  
PCPD2 90.00 usec  
PLW2 14.00000000 W  
PLW12 0.17284000 W

F2 - Processing parameters  
SI 65536  
SF 282.4043552 MHz  
WDW EM  
SSB 0  
LB 0.30 Hz  
GB 0  
PC 1.00

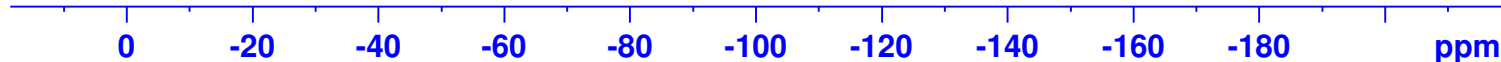

3sjwei 4976 xh1-2-46 1h cdcl3

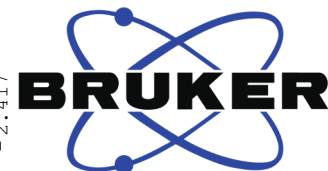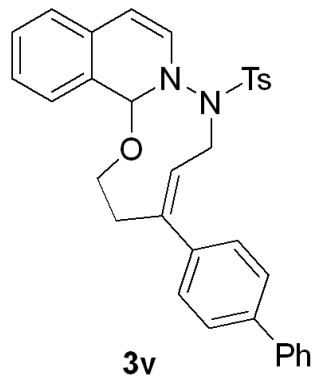

7.703  
7.675  
7.583  
7.578  
7.554  
7.541  
7.519  
7.513  
7.450  
7.444  
7.426  
7.421  
7.401  
7.364  
7.357  
7.336  
7.260  
7.250  
7.245  
7.238  
7.232  
7.179  
7.175  
7.153  
7.149  
7.130  
7.125  
7.118  
7.097  
7.051  
7.026  
6.083  
6.080  
6.058  
6.054  
6.003  
5.985  
5.957  
5.410  
5.385  
4.899  
4.870  
4.855  
4.826  
4.546  
4.522  
4.501  
4.477  
3.541  
3.529  
3.520  
3.510  
3.501  
3.489  
3.481  
3.292  
3.271  
3.262  
3.253  
3.231  
3.026  
3.020  
2.626  
2.613  
2.606  
2.417

Current Data Parameters  
NAME 2021-4--11Project 1 data  
EXPNO 4976  
PROCNO 1

F2 - Acquisition Parameters  
Date\_ 20210804  
Time 9.13  
INSTRUM spect  
PROBHD 5 mm PABBO BB-  
PULPROG zg30  
TD 65536  
SOLVENT CDC13  
NS 16  
DS 2  
SWH 6009.615 Hz  
FIDRES 0.091699 Hz  
AQ 5.4525952 sec  
RG 144  
DW 83.200 usec  
DE 6.50 usec  
TE 296.1 K  
D1 1.00000000 sec  
TD0 1

==== CHANNEL f1 =====  
SFO1 300.1318534 MHz  
NUC1 1H  
P1 10.00 usec  
PLW1 14.00000000 W

F2 - Processing parameters  
SI 65536  
SF 300.1300104 MHz  
WDW EM  
SSB 0  
LB 0.30 Hz  
GB 0  
PC 1.00

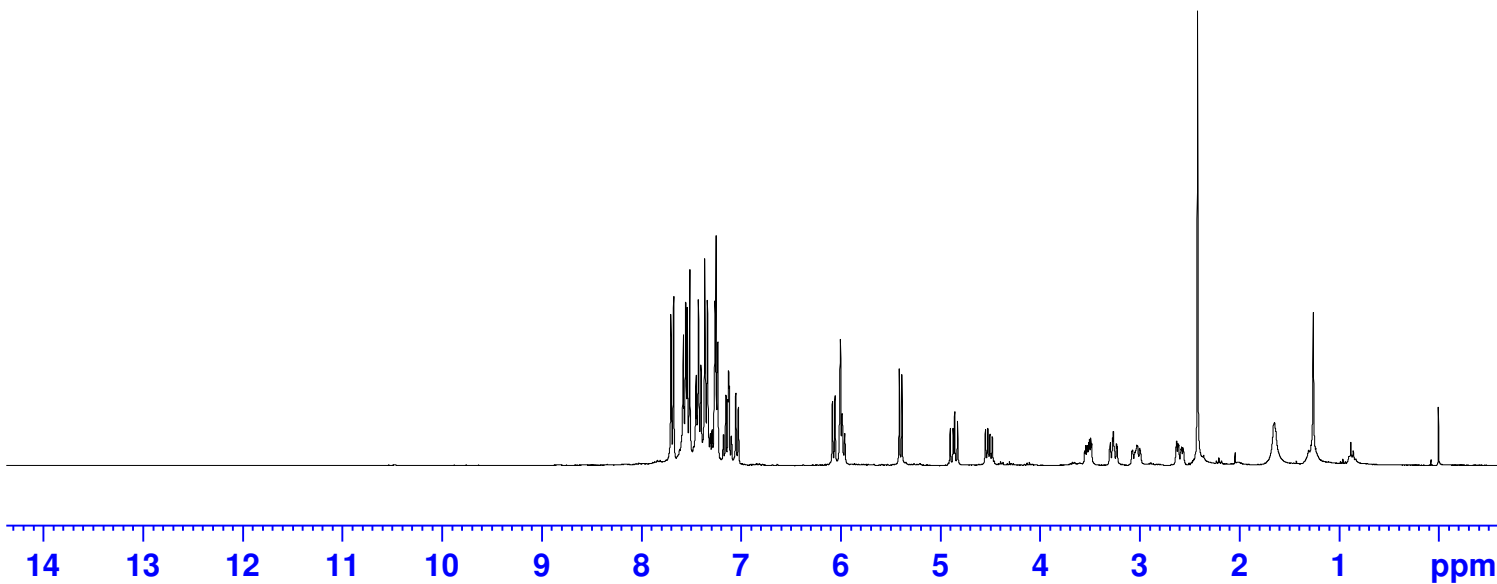

2.05  
4.95  
3.07  
3.29  
1.48  
1.11  
2.15  
0.99  
0.98  
1.95  
1.02  
1.01  
1.02  
1.00  
1.03  
0.96  
0.96  
3.18

3sjwei 5003 xh1-2-46 13c cdcl3

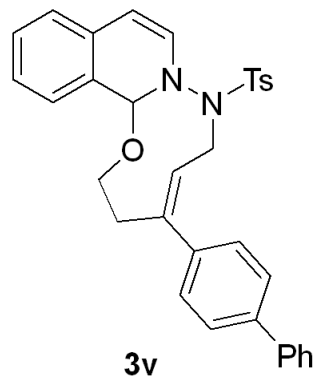

146.34  
144.46  
141.92  
140.68  
140.50  
135.57  
134.69  
131.91  
129.92  
128.91  
128.82  
128.32  
127.94  
127.60  
127.48  
127.22  
127.10  
126.91  
125.81  
124.16  
121.78  
99.42  
88.88  
77.57  
77.15  
76.73  
63.51  
49.19  
32.88  
21.74

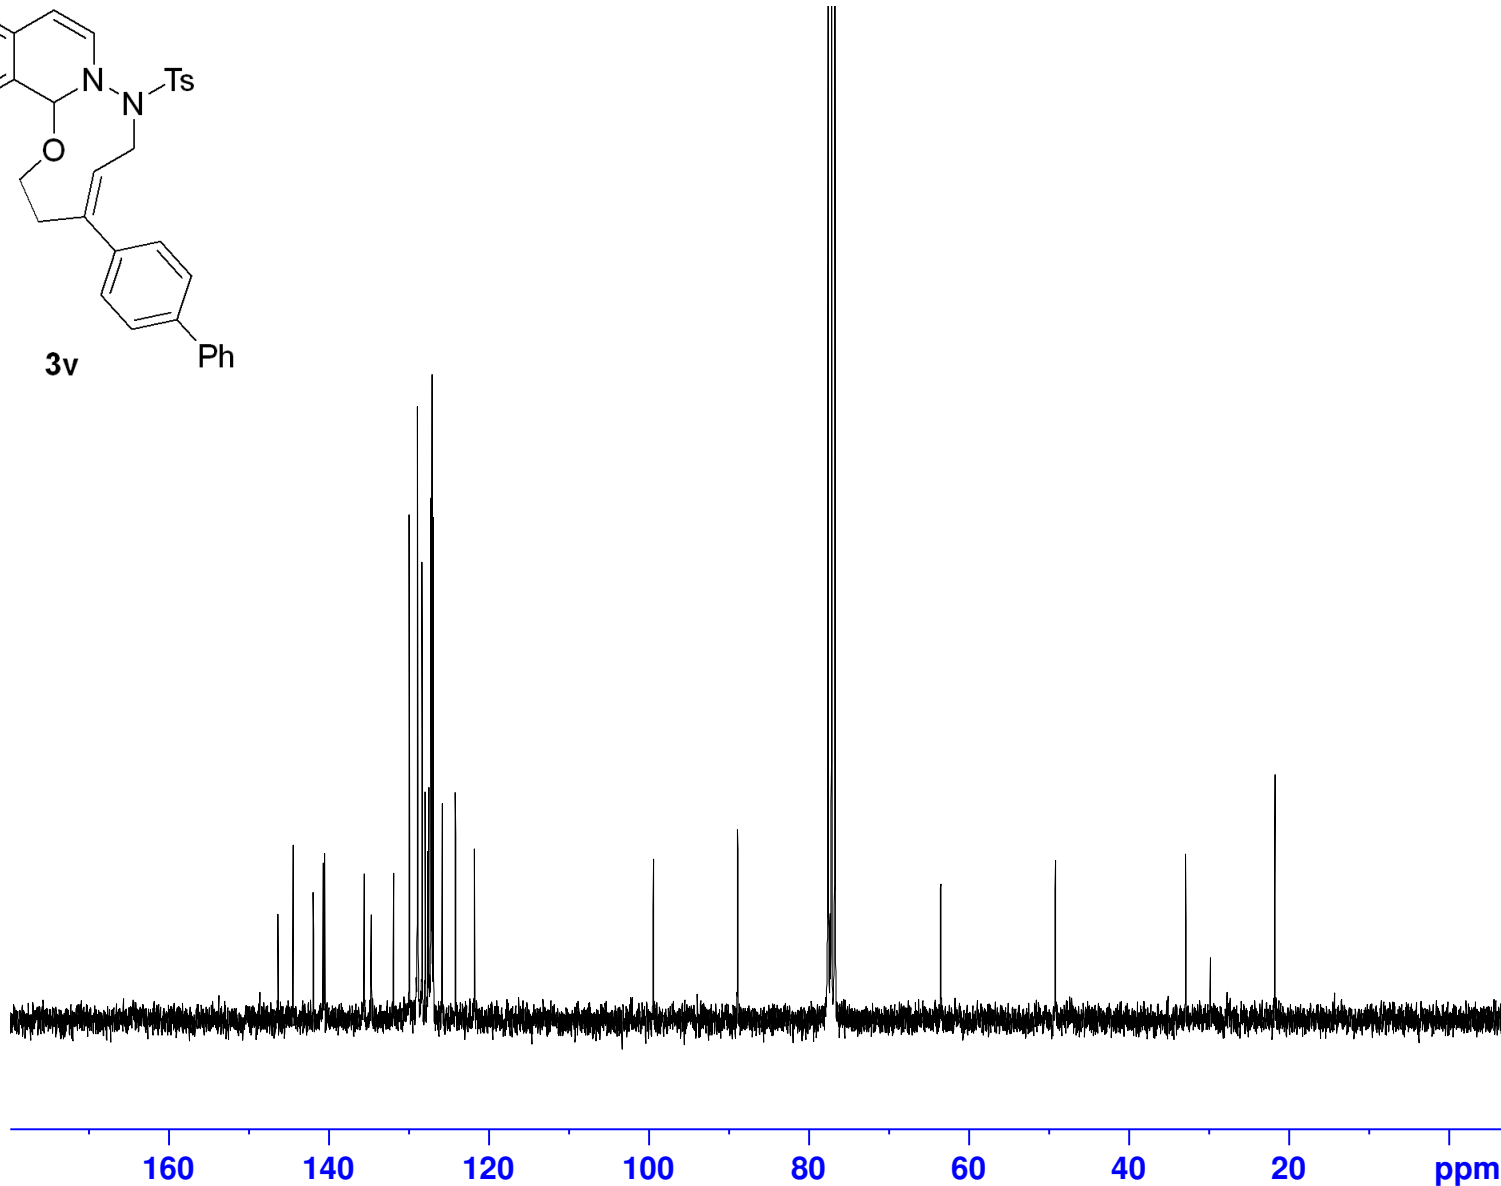

Current Data Parameters  
NAME 2021-4--11Project 1 data  
EXPNO 5003  
PROCNO 1

F2 - Acquisition Parameters  
Date\_ 20210805  
Time 10.51  
INSTRUM spect  
PROBHD 5 mm PABBO BB-  
PULPROG zgpg30  
TD 65536  
SOLVENT CDC13  
NS 800  
DS 4  
SWH 18028.846 Hz  
FIDRES 0.275098 Hz  
AQ 1.8175317 sec  
RG 203  
DW 27.733 usec  
DE 6.50 usec  
TE 296.1 K  
D1 2.00000000 sec  
D11 0.03000000 sec  
TD0 1

===== CHANNEL f1 =====  
SFO1 75.4752949 MHz  
NUC1 13C  
P1 9.50 usec  
PLW1 34.20000076 W

===== CHANNEL f2 =====  
SFO2 300.1312005 MHz  
NUC2 1H  
CPDPRG[2] waltz16  
PCPD2 90.00 usec  
PLW2 14.00000000 W  
PLW12 0.17284000 W  
PLW13 0.14000000 W

F2 - Processing parameters  
SI 32768  
SF 75.4677415 MHz  
WDW EM  
SSB 0  
LB 1.00 Hz  
GB 0  
PC 1.40



3sjwei 5510 xhl-3-3 13c cdcl3

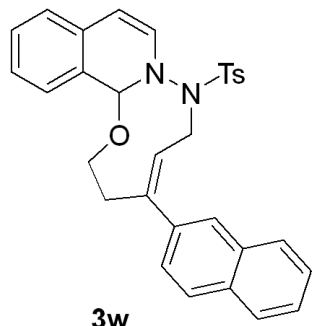

146.62  
144.47  
140.33  
135.61  
134.72  
133.37  
132.84  
131.94  
129.95  
128.84  
128.34  
128.23  
128.16  
127.96  
127.66  
127.61  
126.40  
126.13  
125.83  
125.23  
124.79  
124.18  
122.42  
99.46

88.85

77.58  
77.15  
76.73

63.57

49.28

32.97

21.77

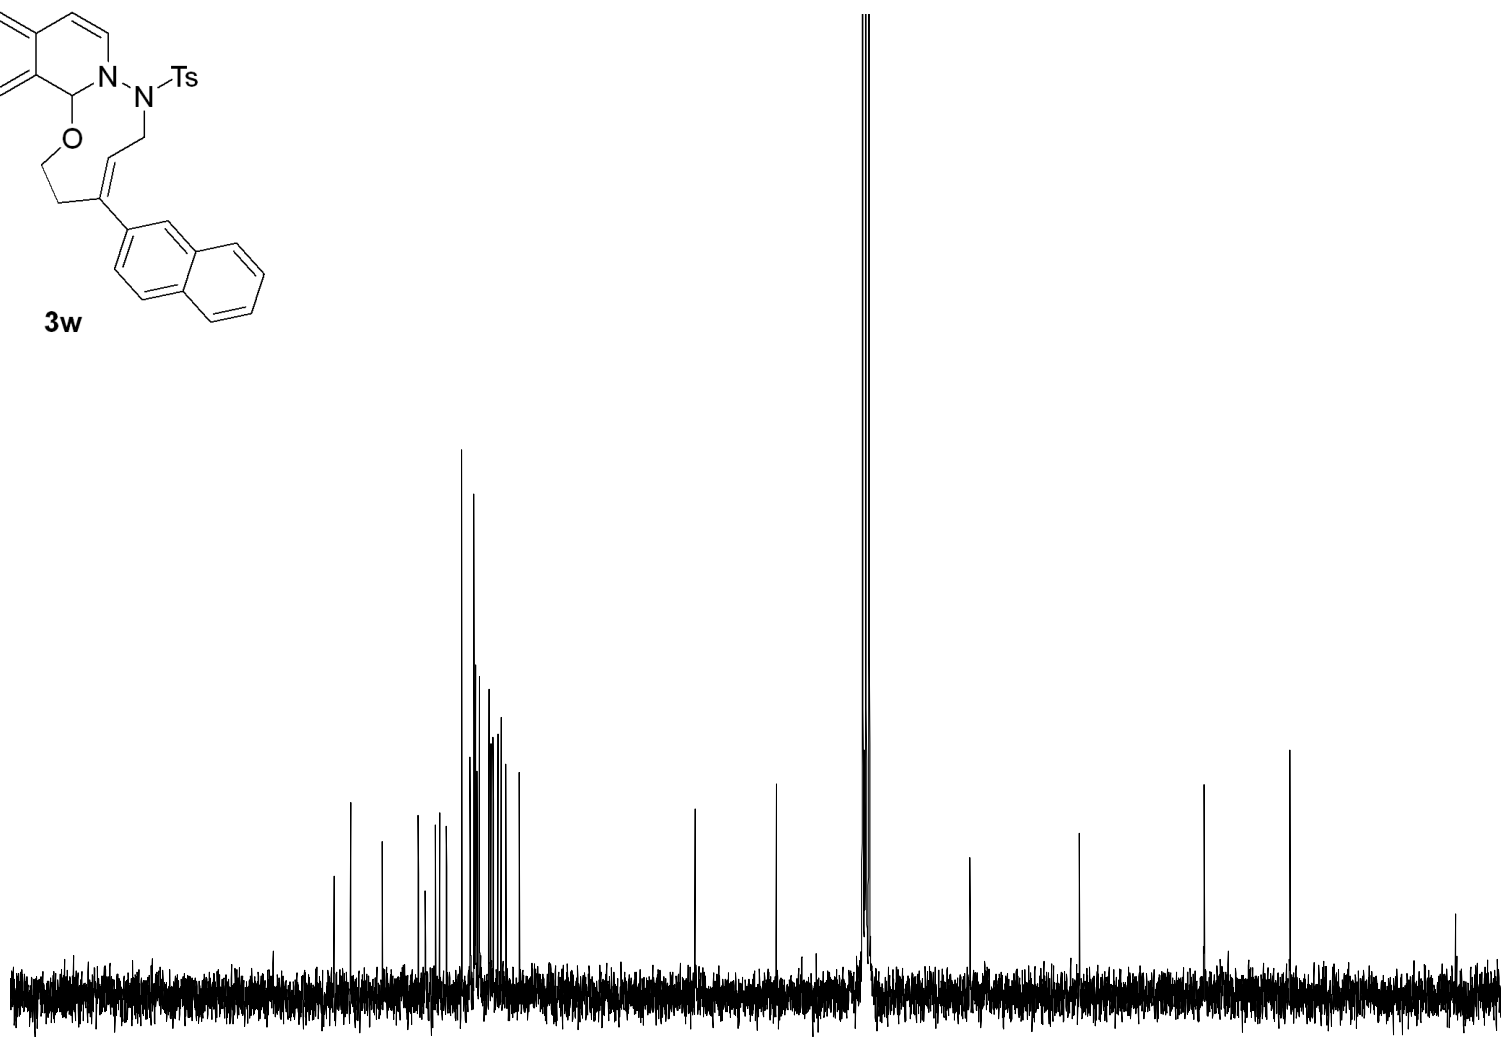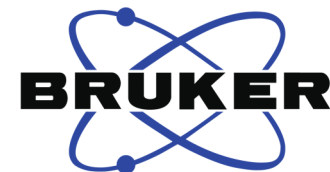

Current Data Parameters  
NAME 2021-4--11Project 1 data  
EXPNO 5510  
PROCNO 1

F2 - Acquisition Parameters  
Date\_ 20211009  
Time 11.45  
INSTRUM spect  
PROBHD 5 mm PABBO BB-  
PULPROG zgpg30  
TD 65536  
SOLVENT CDCl3  
NS 1500  
DS 4  
SWH 18028.846 Hz  
FIDRES 0.275098 Hz  
AQ 1.8175317 sec  
RG 203  
DW 27.733 usec  
DE 6.50 usec  
TE -59.1 K  
D1 2.0000000 sec  
D11 0.0300000 sec  
TD0 1

===== CHANNEL f1 =====  
SFO1 75.4752949 MHz  
NUC1 13C  
P1 9.50 usec  
PLW1 34.20000076 W

===== CHANNEL f2 =====  
SFO2 300.1312005 MHz  
NUC2 1H  
CPDPRG[2] waltz16  
PCPD2 90.00 usec  
PLW2 14.00000000 W  
PLW12 0.17284000 W  
PLW13 0.14000000 W

F2 - Processing parameters  
SI 32768  
SF 75.4677399 MHz  
WDW EM  
SSB 0  
LB 1.00 Hz  
GB 0  
PC 1.40

180 160 140 120 100 80 60 40 20 ppm

3sjwei 5624 xh1-3-76 1h cdcl3

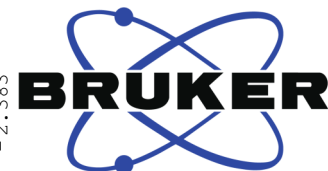

7.641  
7.614  
7.391  
7.381  
7.376  
7.361  
7.352  
7.336  
7.328  
7.323  
7.319  
7.314  
7.293  
7.279  
7.268  
7.251  
7.244  
7.237  
7.226  
7.208  
7.188  
7.181  
7.173  
7.171  
7.168  
7.162  
7.156  
7.103  
7.099  
7.077  
7.073  
7.068  
7.064  
7.043  
7.039  
5.927  
5.923  
5.897  
5.893  
5.889  
5.777  
5.756  
5.752  
5.731  
5.593  
5.568  
4.846  
4.825  
4.799  
4.779  
4.184  
4.158  
4.137  
4.111  
3.226  
3.219  
3.186  
3.140  
3.130  
2.831  
2.819  
2.805  
2.792  
2.440  
2.395  
2.383

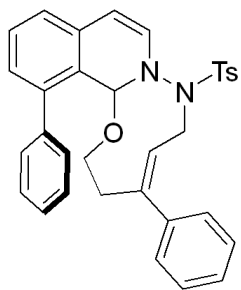

5a

Current Data Parameters  
NAME 2021-4--11Project 1 data  
EXPNO 5624  
PROCNO 1

F2 - Acquisition Parameters  
Date\_ 20211123  
Time 9.06  
INSTRUM spect  
PROBHD 5 mm PABBO BB-  
PULPROG zg30  
TD 65536  
SOLVENT CDC13  
NS 16  
DS 2  
SWH 6009.615 Hz  
FIDRES 0.091699 Hz  
AQ 5.4525952 sec  
RG 114  
DW 83.200 usec  
DE 6.50 usec  
TE -59.1 K  
D1 1.00000000 sec  
TD0 1

==== CHANNEL f1 =====  
SFO1 300.1318534 MHz  
NUC1 1H  
P1 10.00 usec  
PLW1 14.00000000 W

F2 - Processing parameters  
SI 65536  
SF 300.1300120 MHz  
WDW EM  
SSB 0  
LB 0.30 Hz  
GB 0  
PC 1.00

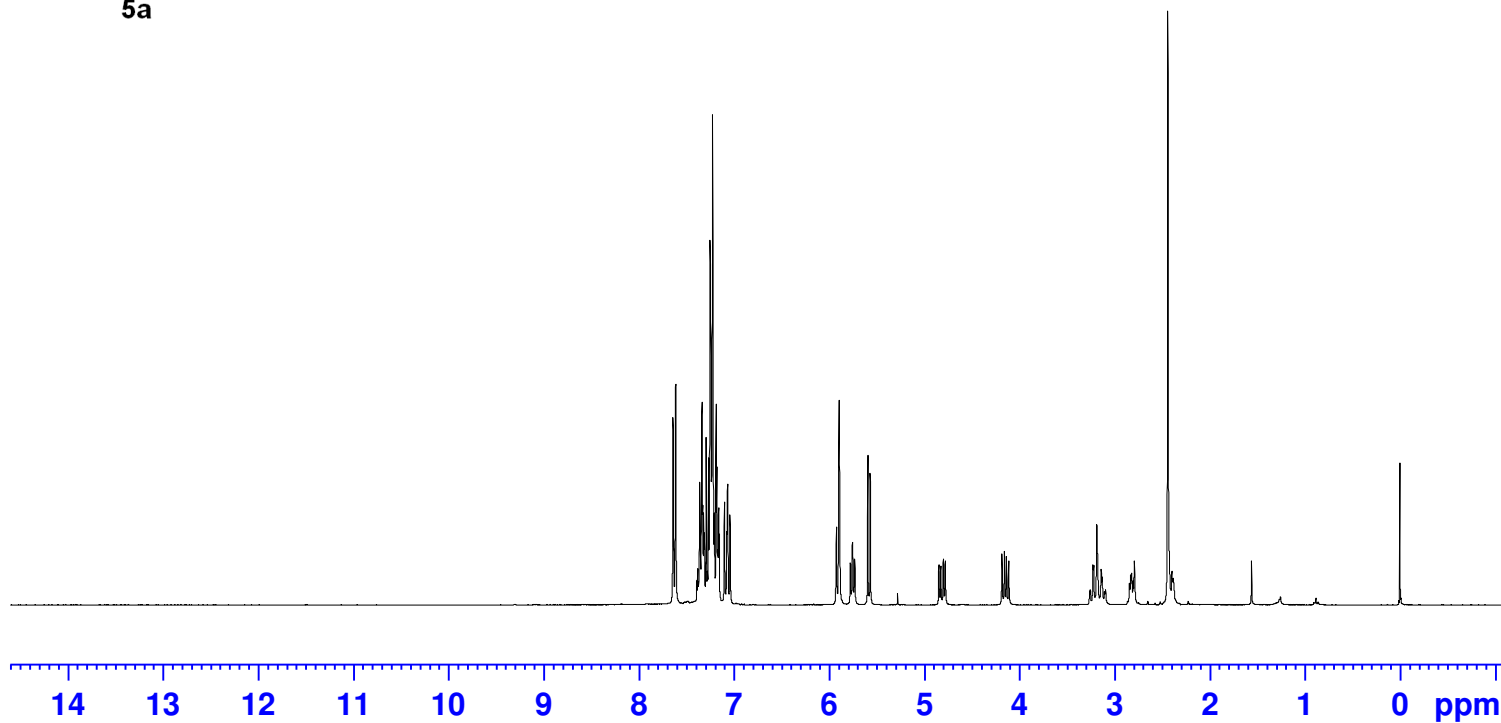

2.08  
11.70  
2.10  
2.08  
2.02  
1.00  
0.99  
0.99  
1.00  
2.01  
0.96  
4.07

3sjwei 5631 xh1-3-76 13c cdcl3



Current Data Parameters  
NAME 2021-4--11Project 1 data  
EXPNO 5631  
PROCNO 1

F2 - Acquisition Parameters  
Date\_ 20211123  
Time 11.15  
INSTRUM spect  
PROBHD 5 mm PABBO BB-  
PULPROG zgpg30  
TD 65536  
SOLVENT CDCl3  
NS 1024  
DS 4  
SWH 18028.846 Hz  
FIDRES 0.275098 Hz  
AQ 1.8175317 sec  
RG 203  
DW 27.733 usec  
DE 6.50 usec  
TE -59.1 K  
D1 2.00000000 sec  
D11 0.03000000 sec  
TD0 1

===== CHANNEL f1 =====  
SFO1 75.4752949 MHz  
NUC1 13C  
P1 9.50 usec  
PLW1 34.20000076 W

===== CHANNEL f2 =====  
SFO2 300.1312005 MHz  
NUC2 1H  
CPDPRG[2] waltz16  
PCPD2 90.00 usec  
PLW2 14.00000000 W  
PLW12 0.17284000 W  
PLW13 0.14000000 W

F2 - Processing parameters  
SI 32768  
SF 75.4677433 MHz  
WDW EM  
SSB 0  
LB 1.00 Hz  
GB 0  
PC 1.40

146.19  
144.45  
142.33  
140.96  
140.46  
134.08  
131.35  
129.81  
129.38  
128.72  
128.39  
128.20  
128.04  
127.68  
127.54  
127.29  
126.56  
126.26  
123.81  
120.28  
101.36  
88.21  
77.57  
77.15  
76.72  
65.07  
48.23  
33.06  
21.82

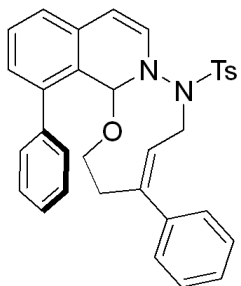

5a

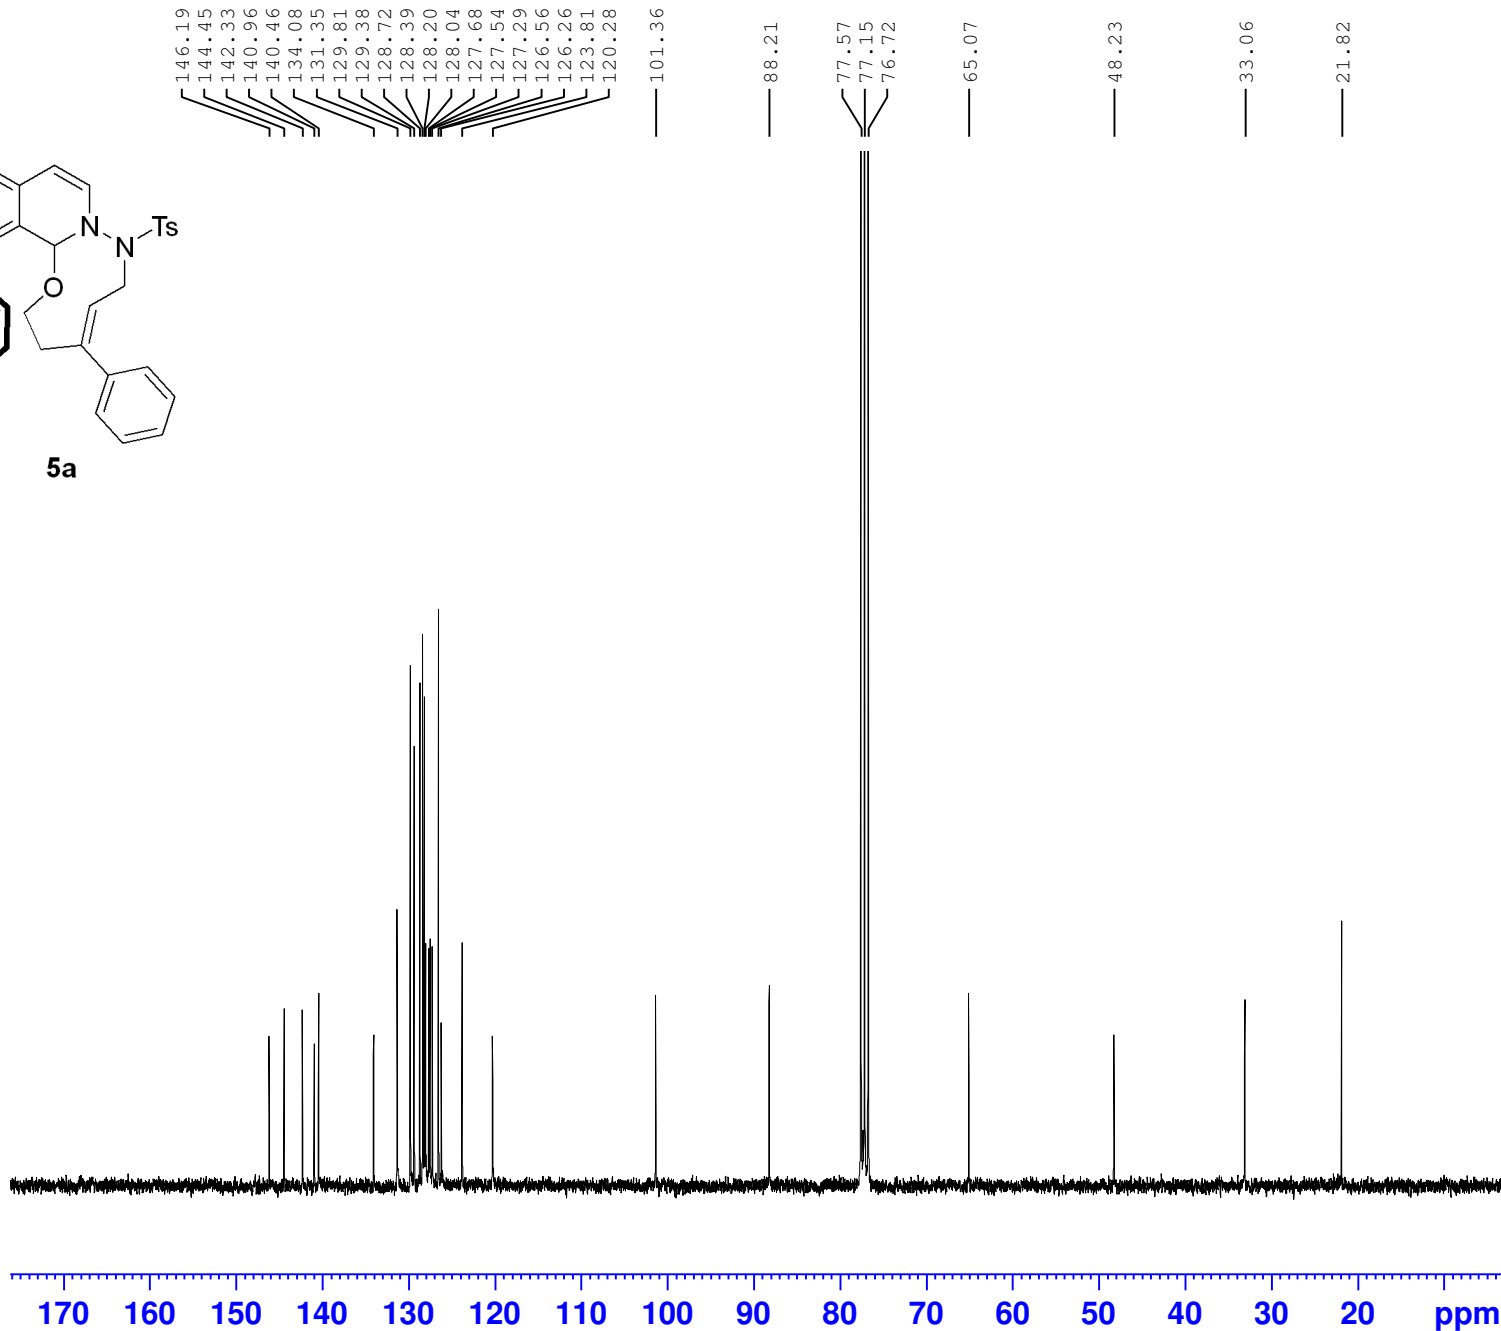

170 160 150 140 130 120 110 100 90 80 70 60 50 40 30 20 ppm

XHL-4-57

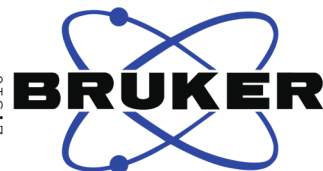

Current Data Parameters  
NAME 2021-4--11Project 1 data  
EXPNO 7  
PROCNO 1

F2 - Acquisition Parameters  
Date\_ 20220531  
Time 20.26 h  
INSTRUM Avance  
PROBHD Z116098\_0833 (  
PULPROG zg30  
TD 65536  
SOLVENT CDC13  
NS 16  
DS 2  
SWH 8196.722 Hz  
FIDRES 0.250144 Hz  
AQ 3.9976959 sec  
RG 81.3802  
DW 61.000 usec  
DE 13.54 usec  
TE 294.7 K  
D1 1.00000000 sec  
TD0 1  
SFO1 400.1324708 MHz  
NUC1 1H  
P0 3.33 usec  
P1 10.00 usec  
PLW1 20.73200035 W

F2 - Processing parameters  
SI 65536  
SF 400.1300105 MHz  
WDW EM  
SSB 0  
LB 0.30 Hz  
GB 0  
PC 1.00

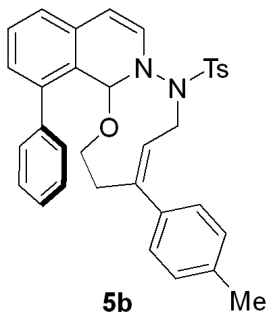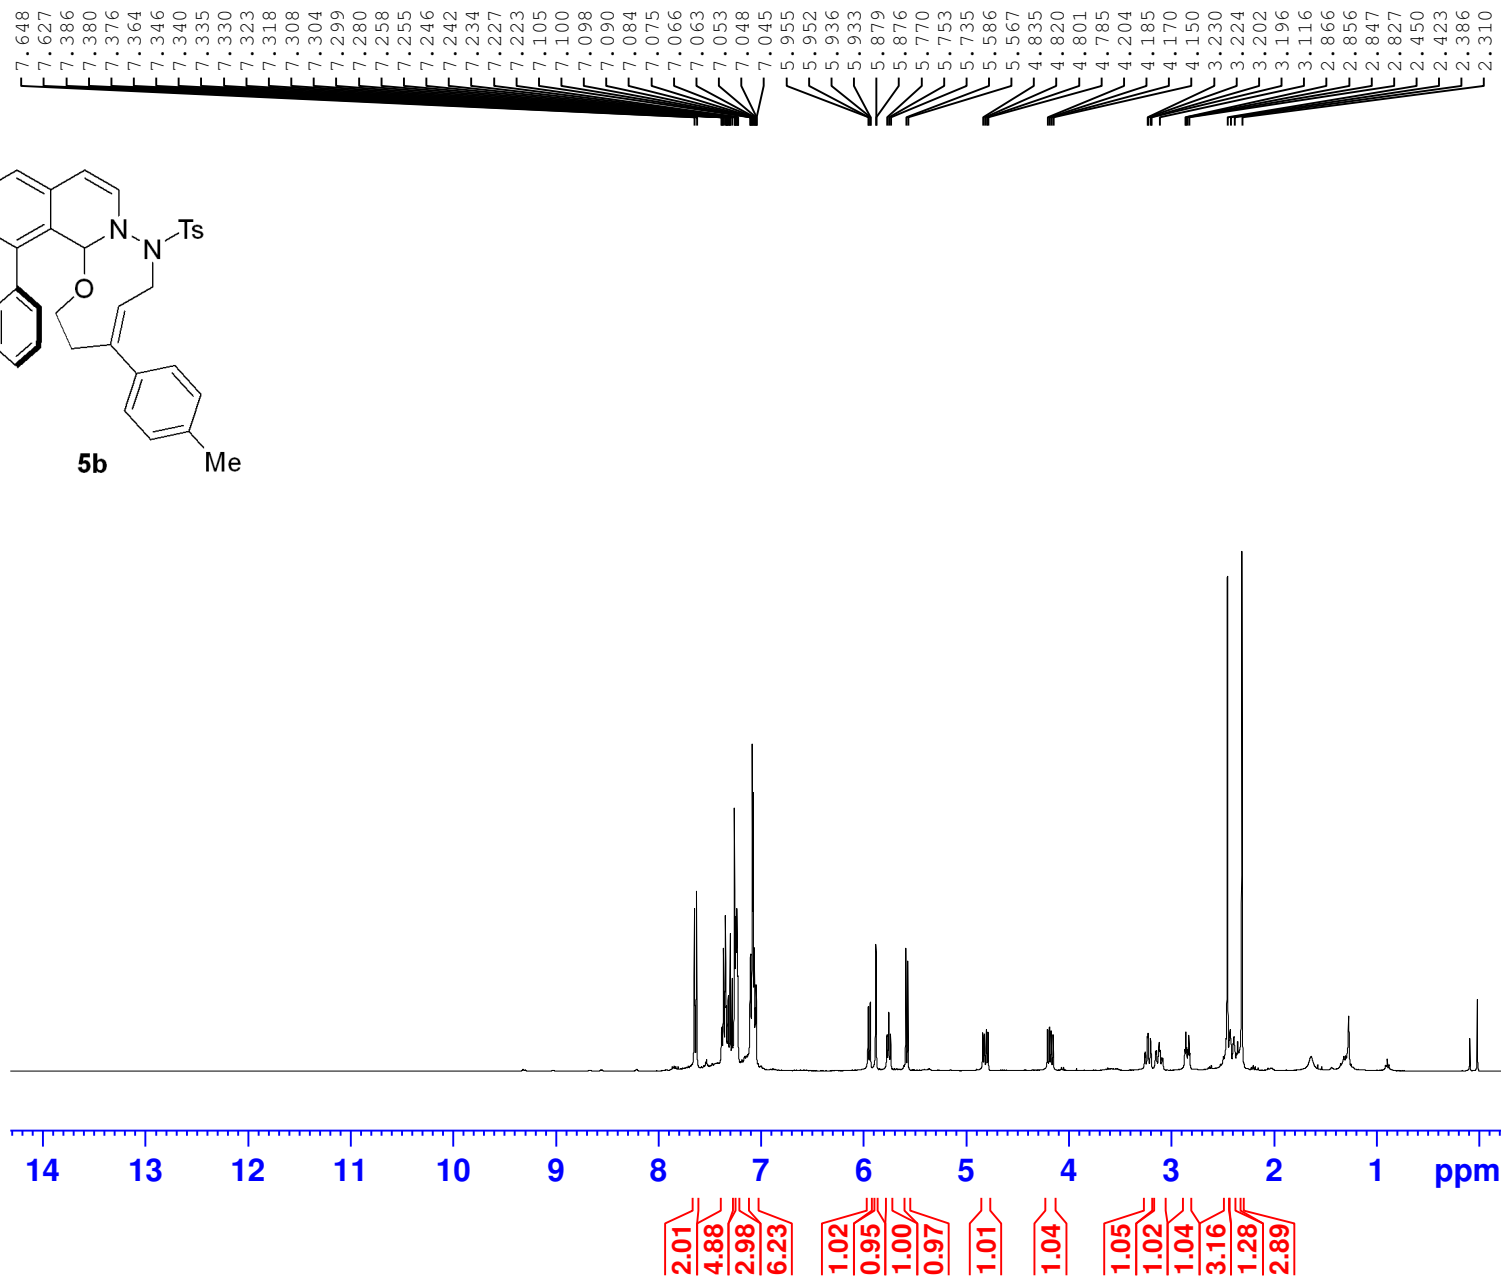



XHL-4-57-c

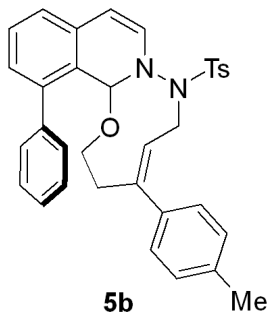

146.11  
144.40  
141.02  
140.47  
139.47  
137.32  
134.26  
131.72  
131.45  
129.81  
129.37  
129.09  
128.67  
128.17  
128.03  
127.65  
127.26  
126.41  
126.18  
123.78  
119.61  
101.21

88.08

77.46  
77.15  
76.83

65.06

48.38

33.00

21.81  
21.17

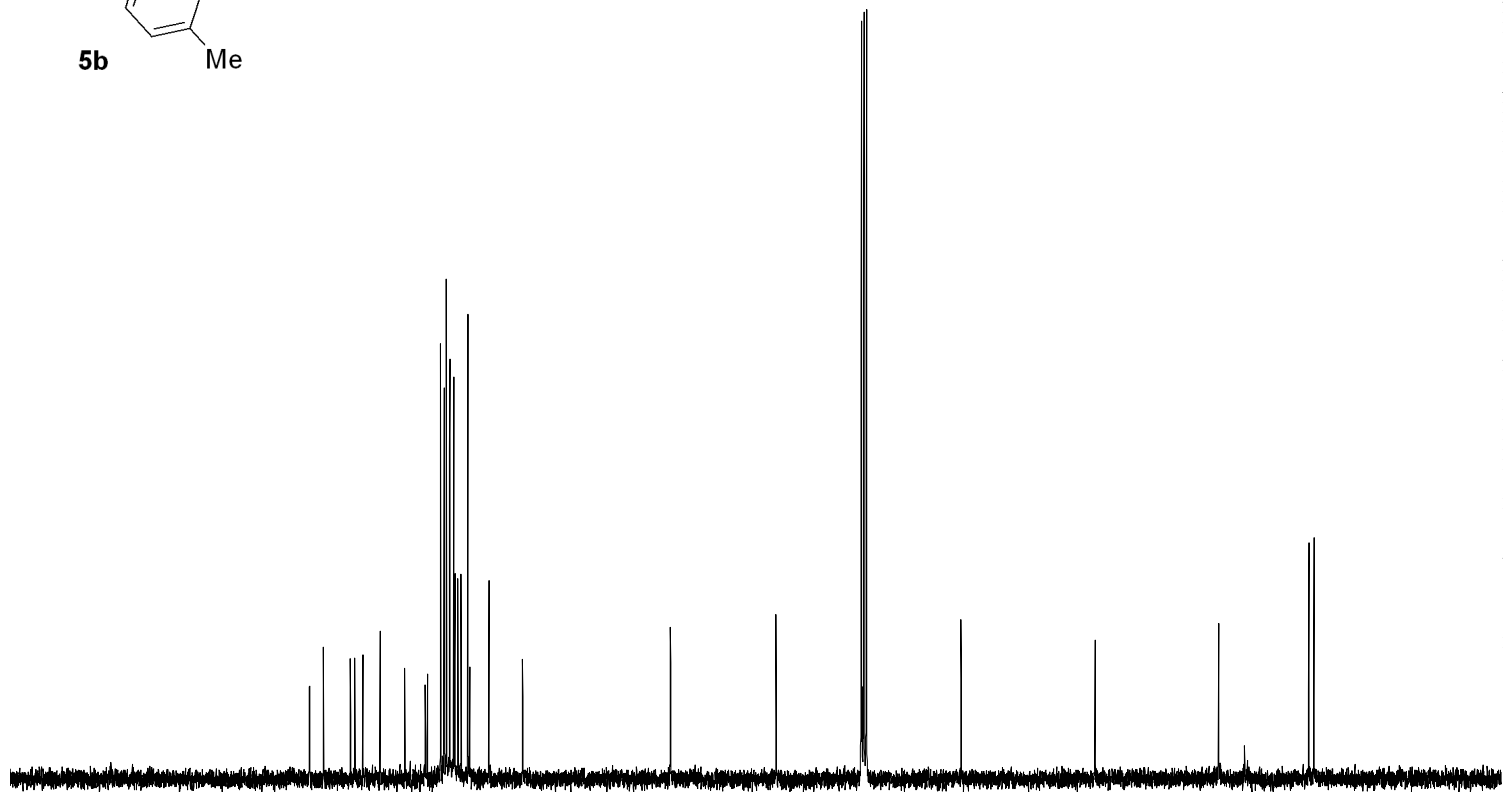

180 170 160 150 140 130 120 110 100 90 80 70 60 50 40 30 20 ppm



Current Data Parameters  
NAME 2021-4--11Project 1 data  
EXPNO 8  
PROCNO 1

F2 - Acquisition Parameters  
Date\_ 20220531  
Time 20.41 h  
INSTRUM Avance  
PROBHD Z116098\_0833 (  
PULPROG zgpg30  
TD 65536  
SOLVENT CDC13  
NS 254  
DS 4  
SWH 23809.523 Hz  
FIDRES 0.726609 Hz  
AQ 1.3762560 sec  
RG 51.55  
DW 21.000 usec  
DE 6.50 usec  
TE 294.8 K  
D1 2.0000000 sec  
D11 0.0300000 sec  
TD0 1  
SFO1 100.6228298 MHz  
NUC1 13C  
P0 3.33 usec  
P1 10.00 usec  
PLW1 87.89900208 W  
SFO2 400.1316005 MHz  
NUC2 1H  
CPDPRG[2] waltz65  
PCPD2 90.00 usec  
PLW2 20.73200035 W  
PLW12 0.25595000 W  
PLW13 0.12874000 W

F2 - Processing parameters  
SI 32768  
SF 100.6127606 MHz  
WDW EM  
SSB 0  
LB 1.00 Hz  
GB 0  
PC 1.40

XHL-4-70

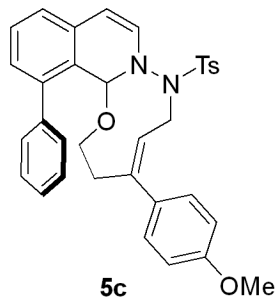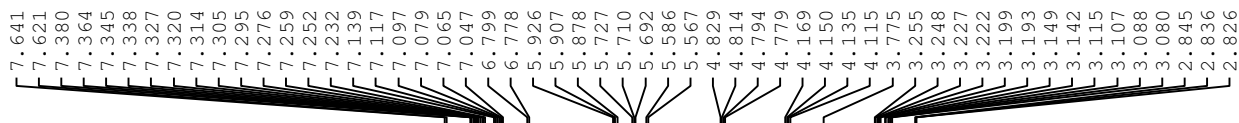

Current Data Parameters  
NAME 2021-4--11Project 1 data  
EXPNO 11  
PROCNO 1

F2 - Acquisition Parameters  
Date\_ 20220531  
Time 21.07 h  
INSTRUM Avance  
PROBHD Z116098\_0833 (  
PULPROG zg30  
TD 65536  
SOLVENT CDC13  
NS 16  
DS 2  
SWH 8196.722 Hz  
FIDRES 0.250144 Hz  
AQ 3.9976959 sec  
RG 92.3873  
DW 61.000 usec  
DE 13.54 usec  
TE 294.2 K  
D1 1.00000000 sec  
TD0 1  
SFO1 400.1324708 MHz  
NUC1 1H  
P0 3.33 usec  
P1 10.00 usec  
PLW1 20.73200035 W

F2 - Processing parameters  
SI 65536  
SF 400.1300104 MHz  
WDW EM  
SSB 0  
LB 0.30 Hz  
GB 0  
PC 1.00

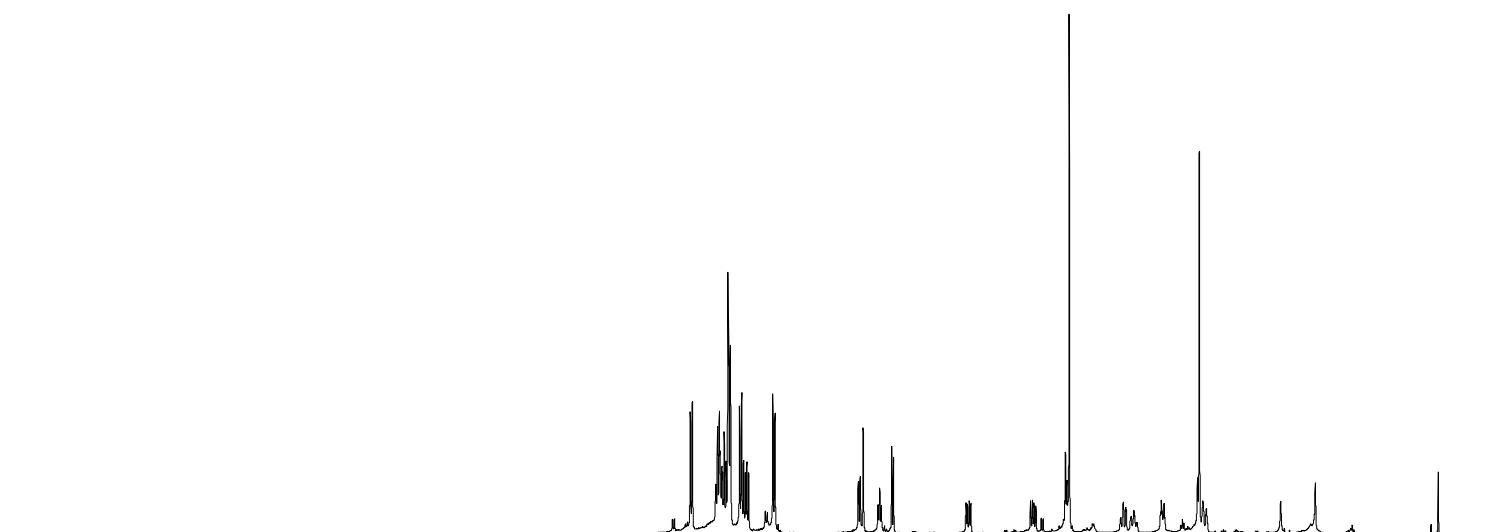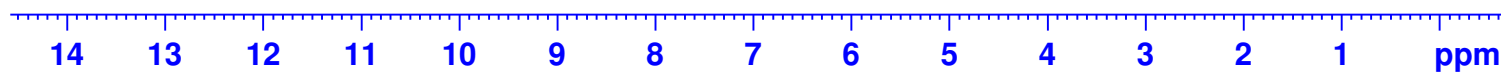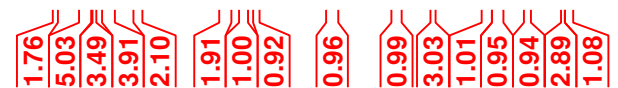

XHL-4-70-C

159.20  
145.60  
144.42  
140.98  
140.47  
134.69  
134.13  
131.45  
131.39  
129.80  
129.38  
128.72  
128.18  
128.01  
127.66  
127.27  
126.26  
123.78  
118.84  
113.77  
101.27  
88.20  
77.46  
77.15  
76.83  
65.06  
55.38  
48.27  
32.96  
21.81

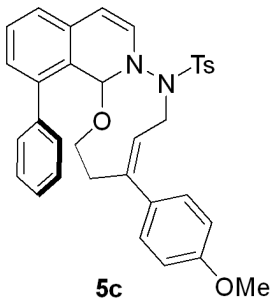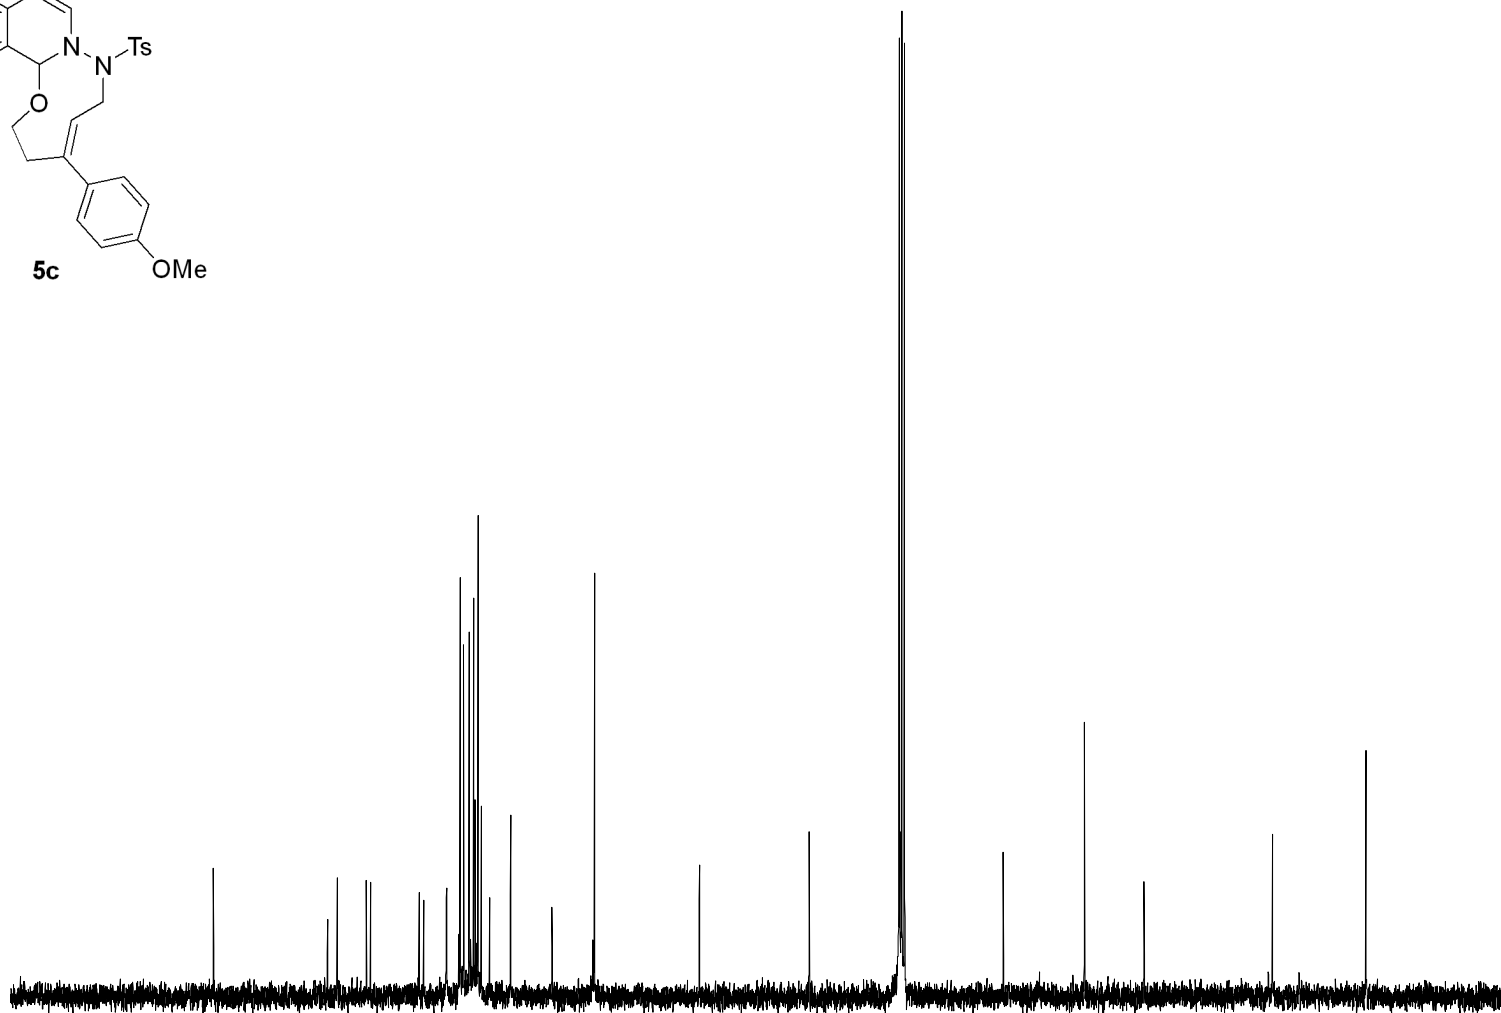

180 170 160 150 140 130 120 110 100 90 80 70 60 50 40 30 20 ppm

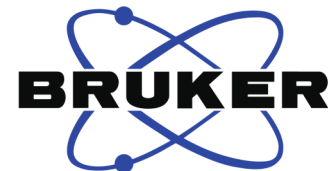

Current Data Parameters  
NAME 2021-4--11Project 1 data  
EXPNO 12  
PROCNO 1

F2 - Acquisition Parameters  
Date\_ 20220531  
Time 21.23 h  
INSTRUM Avance  
PROBHD Z116098\_0833 (  
PULPROG zgpg30  
TD 65536  
SOLVENT CDC13  
NS 254  
DS 4  
SWH 23809.523 Hz  
FIDRES 0.726609 Hz  
AQ 1.3762560 sec  
RG 51.55  
DW 21.000 usec  
DE 6.50 usec  
TE 294.5 K  
D1 2.0000000 sec  
D11 0.0300000 sec  
TD0 1  
SFO1 100.6228298 MHz  
NUC1 13C  
P0 3.33 usec  
P1 10.00 usec  
PLW1 87.89900208 W  
SFO2 400.1316005 MHz  
NUC2 1H  
CPDPRG[2] waltz65  
PCPD2 90.00 usec  
PLW2 20.73200035 W  
PLW12 0.25595000 W  
PLW13 0.12874000 W

F2 - Processing parameters  
SI 32768  
SF 100.6127605 MHz  
WDW EM  
SSB 0  
LB 1.00 Hz  
GB 0  
PC 1.40

XHL-4-58-H

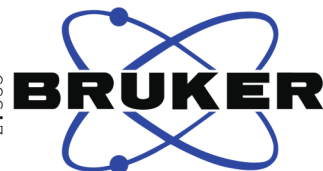

Current Data Parameters  
NAME 2021-4--11Project 1 data  
EXPNO 30  
PROCNO 1

F2 - Acquisition Parameters  
Date\_ 20220601  
Time 16.12  
INSTRUM spect  
PROBHD 5 mm PABBO BB-  
PULPROG zg30  
TD 65536  
SOLVENT CDCl3  
NS 8  
DS 2  
SWH 8223.685 Hz  
FIDRES 0.125483 Hz  
AQ 3.9845889 sec  
RG 113.67  
DW 60.800 usec  
DE 6.50 usec  
TE 294.8 K  
D1 1.0000000 sec  
TD0 1

==== CHANNEL f1 =====  
NUC1 1H  
P1 14.40 usec  
PLW1 14.0000000 W  
SFO1 400.1924713 MHz

F2 - Processing parameters  
SI 65536  
SF 400.1900184 MHz  
WDW EM  
SSB 0  
LB 0.30 Hz  
GB 0  
PC 1.00

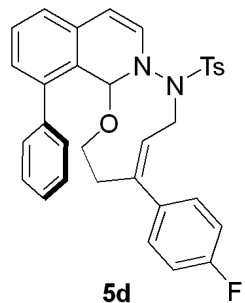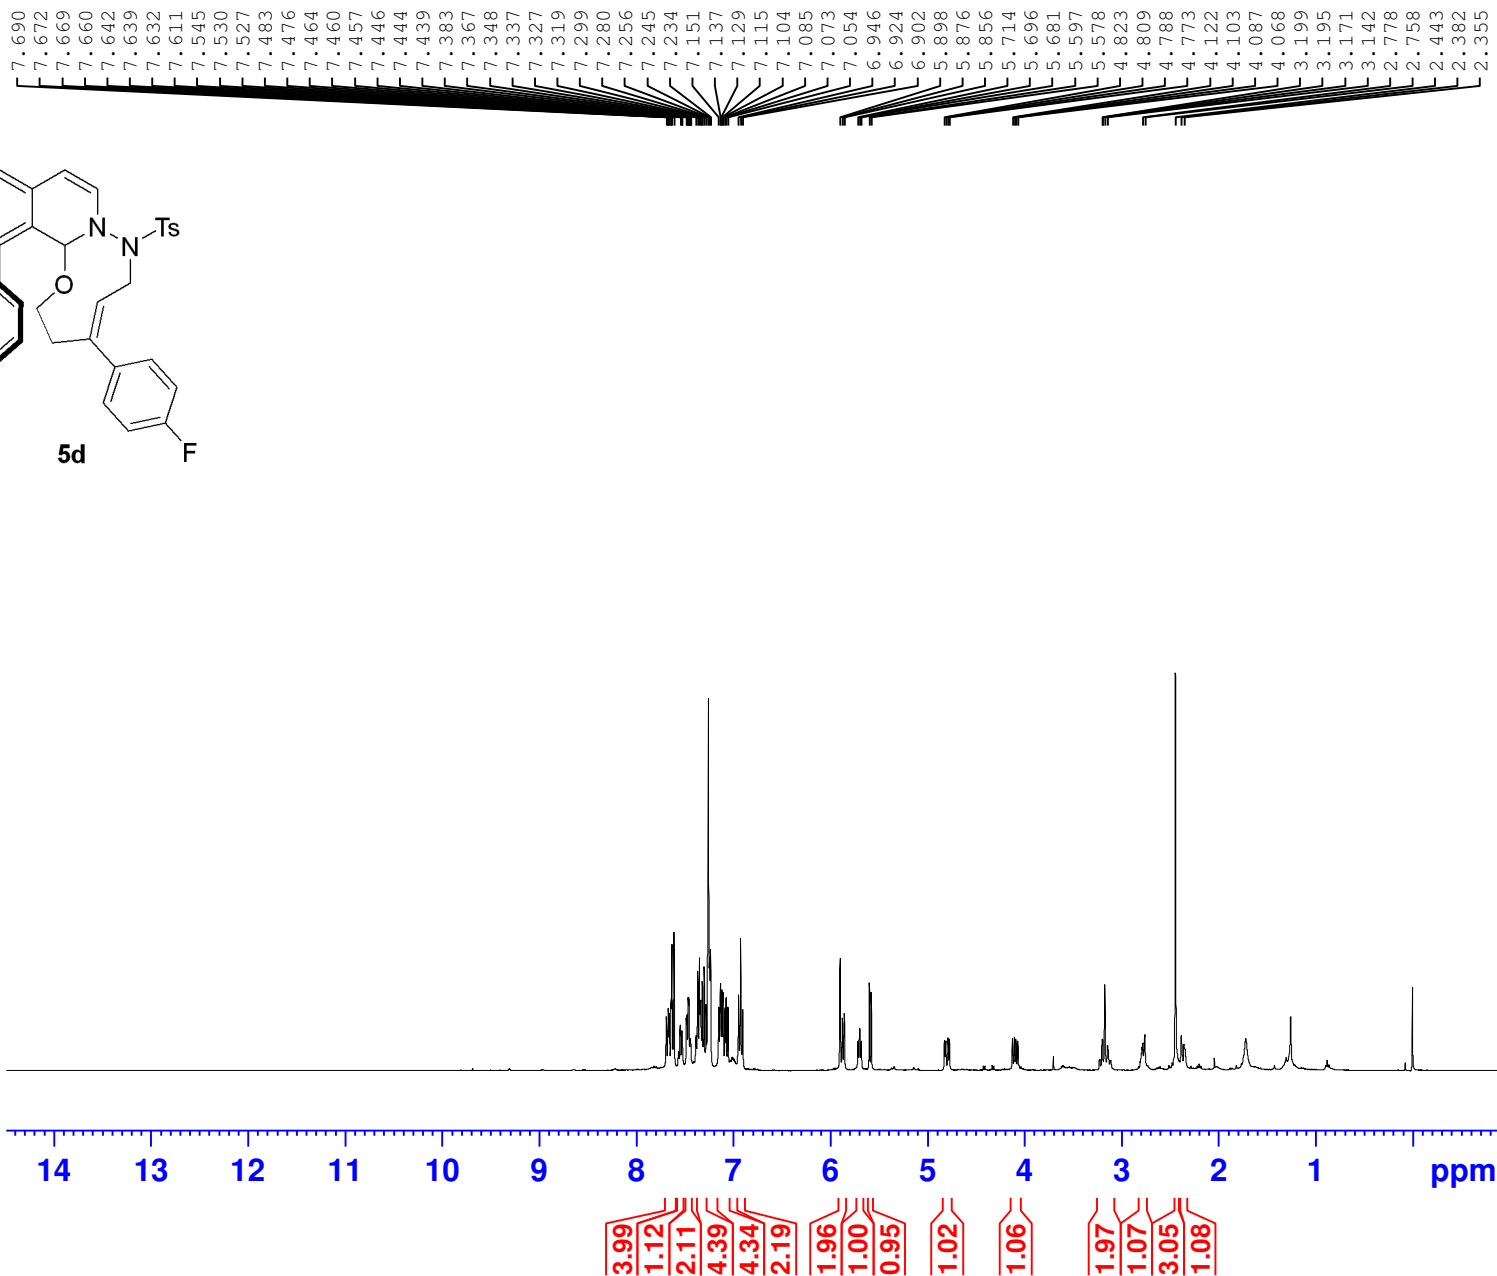

XHL-4-58-C

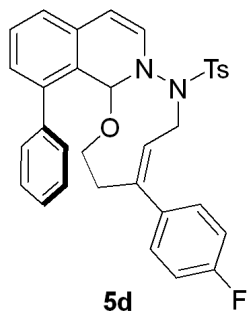

163.62  
161.18  
145.08  
144.56  
140.93  
140.47  
138.30  
138.27  
133.91  
133.10  
132.25  
132.16  
132.09  
132.06  
131.26  
130.85  
129.83  
129.42  
128.79  
128.69  
128.57  
128.28  
128.22  
128.20  
128.06  
127.73  
127.30  
126.34  
123.85  
120.29  
115.33  
115.11  
101.55  
88.44  
77.46  
77.15  
76.83

64.92

47.99

33.17

21.80

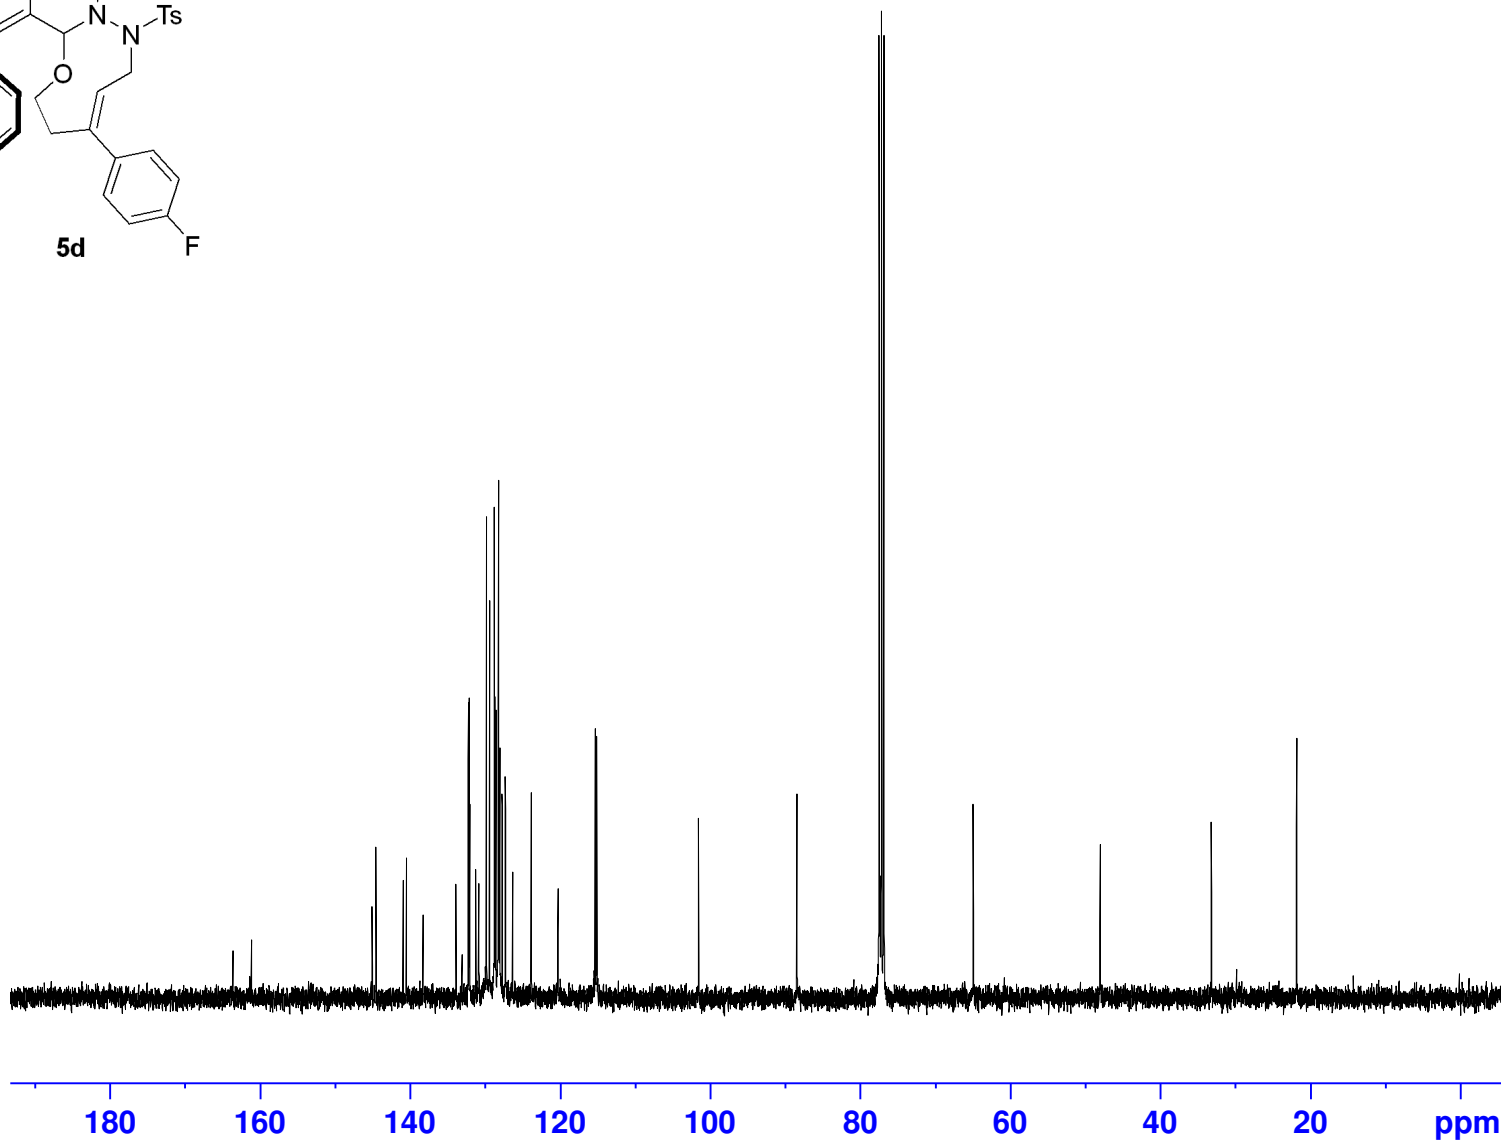

Current Data Parameters  
NAME 2021-4--11Project 1 data  
EXPNO 1  
PROCNO 1

F2 - Acquisition Parameters  
Date\_ 20220603  
Time 11.54 h  
INSTRUM Avance  
PROBHD Z116098\_0833 (  
PULPROG zgpg30  
TD 65536  
SOLVENT CDC13  
NS 512  
DS 4  
SWH 23809.523 Hz  
FIDRES 0.726609 Hz  
AQ 1.3762560 sec  
RG 47.095  
DW 21.000 usec  
DE 6.50 usec  
TE 298.7 K  
D1 2.00000000 sec  
D11 0.03000000 sec  
TD0 1  
SFO1 100.6228298 MHz  
NUC1 13C  
P0 3.33 usec  
P1 10.00 usec  
PLW1 87.89900208 W  
SFO2 400.1316005 MHz  
NUC2 1H  
CPDPRG[2] waltz65  
PCPD2 90.00 usec  
PLW2 20.73200035 W  
PLW12 0.25595000 W  
PLW13 0.12874000 W

F2 - Processing parameters  
SI 32768  
SF 100.6127587 MHz  
WDW EM  
SSB 0  
LB 1.00 Hz  
GB 0  
PC 1.40

XHL-4-58-F

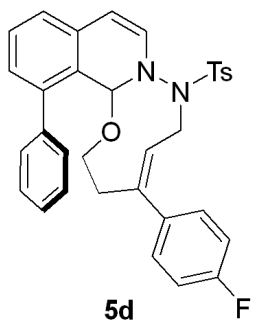

— -115.12

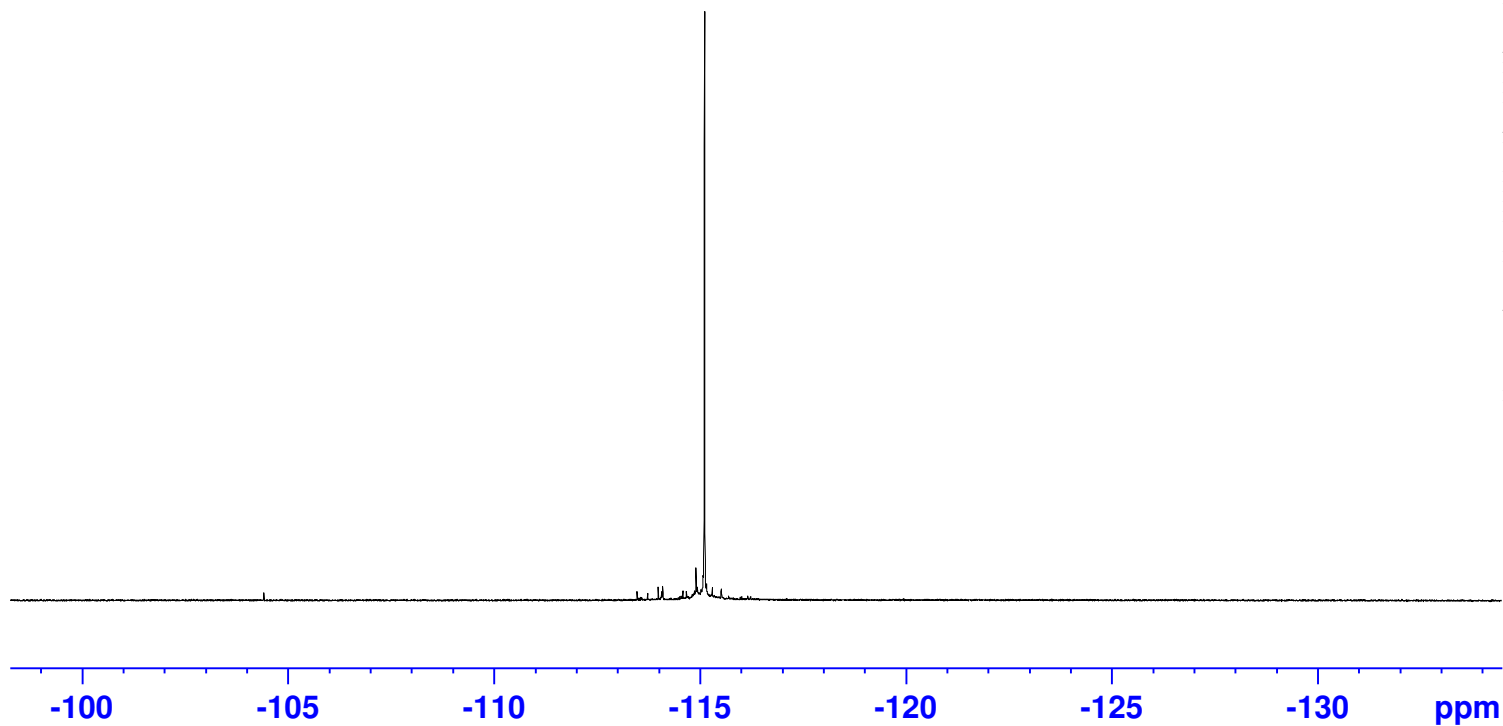

Current Data Parameters  
NAME 2021-4--11Project 1 data  
EXPNO 2  
PROCNO 1

F2 - Acquisition Parameters  
Date\_ 20220603  
Time 11.23 h  
INSTRUM Avance  
PROBHD Z116098\_0833 (  
PULPROG zgig  
TD 131072  
SOLVENT CDC13  
NS 16  
DS 4  
SWH 90909.094 Hz  
FIDRES 1.387163 Hz  
AQ 0.7208960 sec  
RG 101  
DW 5.500 usec  
DE 6.50 usec  
TE 298.4 K  
D1 1.00000000 sec  
D11 0.03000000 sec  
TD0 1  
SFO1 376.4607164 MHz  
NUC1 19F  
P1 18.00 usec  
PLW1 16.73100090 W  
SFO2 400.1316005 MHz  
NUC2 1H  
CPDPRG[2] waltz16  
PCPD2 90.00 usec  
PLW2 20.73200035 W  
PLW12 0.25595000 W

F2 - Processing parameters  
SI 65536  
SF 376.4983662 MHz  
WDW EM  
SSB 0  
LB 0.30 Hz  
GB 0  
PC 1.00

XHL-4-69-H

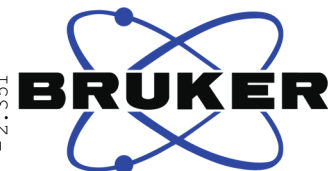

7.701  
7.684  
7.680  
7.671  
7.654  
7.650  
7.639  
7.618  
7.554  
7.550  
7.490  
7.483  
7.470  
7.463  
7.393  
7.388  
7.372  
7.354  
7.348  
7.343  
7.340  
7.333  
7.326  
7.317  
7.307  
7.297  
7.288  
7.260  
7.242  
7.226  
7.205  
7.115  
7.110  
7.094  
7.082  
7.063  
5.903  
5.883  
5.864  
5.761  
5.746  
5.742  
5.727  
5.600  
5.581  
4.831  
4.817  
4.796  
4.781  
4.143  
4.124  
4.108  
4.089  
3.200  
3.196  
3.171  
3.139  
3.132  
2.792  
2.783  
2.772  
2.763  
2.449  
2.388  
2.360  
2.351

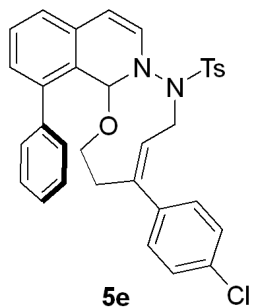

Current Data Parameters  
NAME 2021-4--11Project 1 data  
EXPNO 3  
PROCNO 1

F2 - Acquisition Parameters  
Date\_ 20220531  
Time 19.44 h  
INSTRUM Avance  
PROBHD Z116098\_0833 (  
PULPROG zg30  
TD 65536  
SOLVENT CDC13  
NS 16  
DS 2  
SWH 8196.722 Hz  
FIDRES 0.250144 Hz  
AQ 3.9976959 sec  
RG 91.6422  
DW 61.000 usec  
DE 13.54 usec  
TE 294.5 K  
D1 1.0000000 sec  
TD0 1  
SFO1 400.1324708 MHz  
NUC1 1H  
P0 3.33 usec  
P1 10.00 usec  
PLW1 20.73200035 W

F2 - Processing parameters  
SI 65536  
SF 400.1300103 MHz  
WDW EM  
SSB 0  
LB 0.30 Hz  
GB 0  
PC 1.00

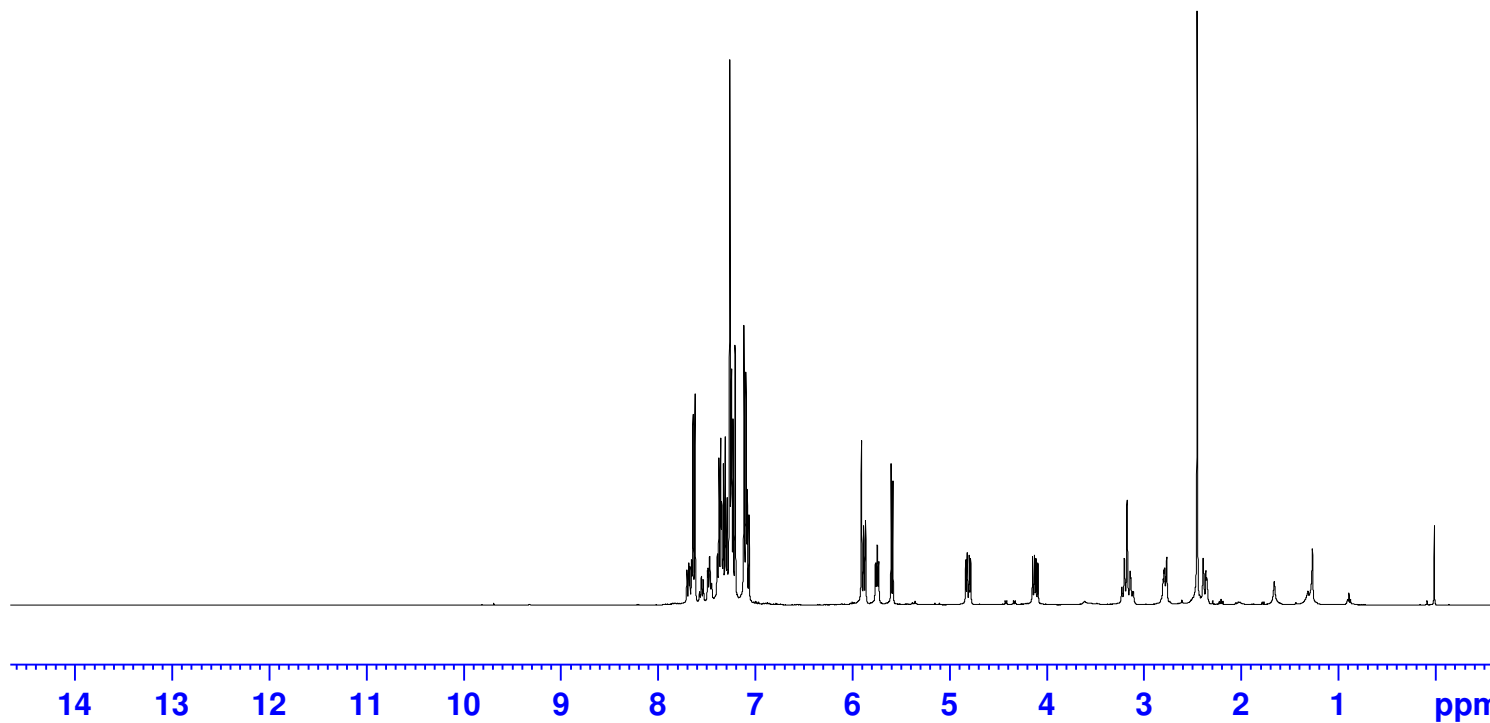

4.54  
4.76  
3.91  
4.13  
2.03  
1.00  
0.96  
1.03  
1.03  
2.06  
1.05  
2.88  
1.00

XHL-4-69-C

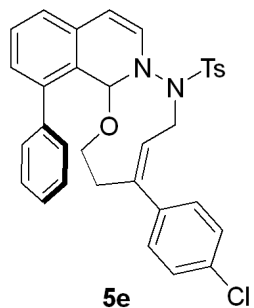

144.91  
144.58  
140.92  
140.66  
140.44  
133.86  
133.40  
132.25  
131.22  
129.84  
129.40  
128.77  
128.54  
128.23  
128.08  
127.92  
127.73  
127.31  
126.28  
123.86  
120.78  
101.56

88.39

77.46  
77.15  
76.83

64.88

47.99

32.95

21.82

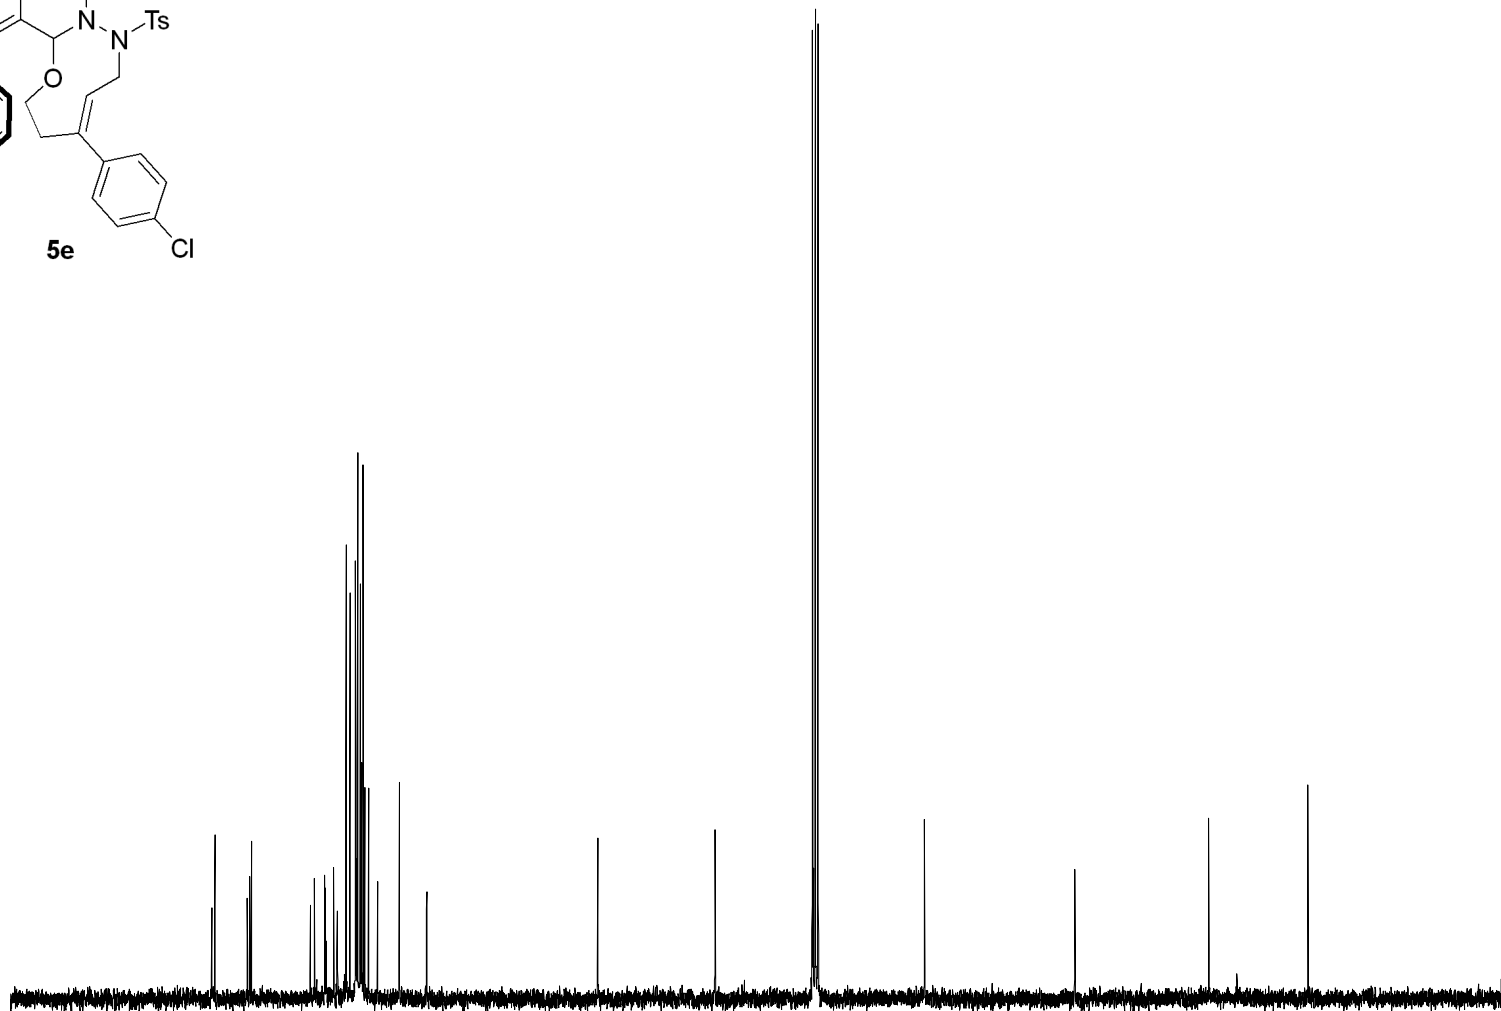

Current Data Parameters  
NAME 2021-4--11Project 1 data  
EXPNO 4  
PROCNO 1

F2 - Acquisition Parameters  
Date\_ 20220531  
Time 19.59 h  
INSTRUM Avance  
PROBHD Z116098\_0833 (  
PULPROG zgpg30  
TD 65536  
SOLVENT CDC13  
NS 254  
DS 4  
SWH 23809.523 Hz  
FIDRES 0.726609 Hz  
AQ 1.3762560 sec  
RG 51.55  
DW 21.000 usec  
DE 6.50 usec  
TE 295.2 K  
D1 2.0000000 sec  
D11 0.0300000 sec  
TD0 1  
SFO1 100.6228298 MHz  
NUC1 13C  
P0 3.33 usec  
P1 10.00 usec  
PLW1 87.89900208 W  
SFO2 400.1316005 MHz  
NUC2 1H  
CPDPRG[2] waltz65  
PCPD2 90.00 usec  
PLW2 20.73200035 W  
PLW12 0.25595000 W  
PLW13 0.12874000 W

F2 - Processing parameters  
SI 32768  
SF 100.6127605 MHz  
WDW EM  
SSB 0  
LB 1.00 Hz  
GB 0  
PC 1.40

160 150 140 130 120 110 100 90 80 70 60 50 40 30 20 ppm



XHL-4-67-H

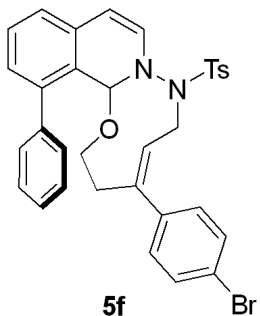

7.638  
7.619  
7.378  
7.374  
7.357  
7.343  
7.328  
7.307  
7.290  
7.288  
7.260  
7.243  
7.110  
7.091  
7.082  
7.063  
7.054  
7.035  
5.903  
5.882  
5.863  
5.766  
5.749  
5.733  
5.598  
5.579  
4.826  
4.812  
4.791  
4.776  
4.144  
4.124  
4.108  
4.089  
3.221  
3.195  
3.168  
3.134  
3.102  
2.800  
2.784  
2.770  
2.762  
2.450  
2.384  
2.356  
2.348



Current Data Parameters  
NAME 2021-4--11Project 1 data  
EXPNO 5  
PROCNO 1

F2 - Acquisition Parameters  
Date\_ 20220531  
Time 20.05 h  
INSTRUM Avance  
PROBHD Z116098\_0833 (  
PULPROG zg30  
TD 65536  
SOLVENT CDC13  
NS 16  
DS 2  
SWH 8196.722 Hz  
FIDRES 0.250144 Hz  
AQ 3.9976959 sec  
RG 101  
DW 61.000 usec  
DE 13.54 usec  
TE 294.4 K  
D1 1.00000000 sec  
TD0 1  
SFO1 400.1324708 MHz  
NUC1 1H  
P0 3.33 usec  
P1 10.00 usec  
PLW1 20.73200035 W

F2 - Processing parameters  
SI 65536  
SF 400.1300111 MHz  
WDW EM  
SSB 0  
LB 0.30 Hz  
GB 0  
PC 1.00

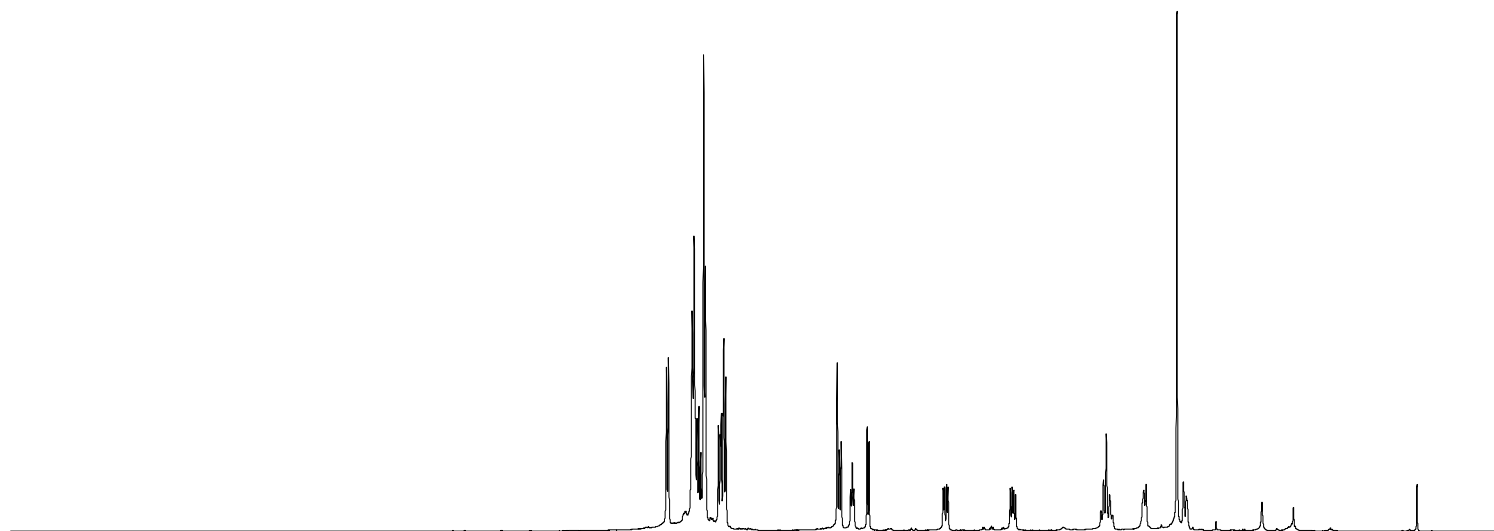

14 13 12 11 10 9 8 7 6 5 4 3 2 1 ppm

2.10  
11.49  
4.10  
1.98  
1.02  
0.98  
1.02  
1.01  
2.02  
1.07  
3.00  
1.02

XHL-4-67-C

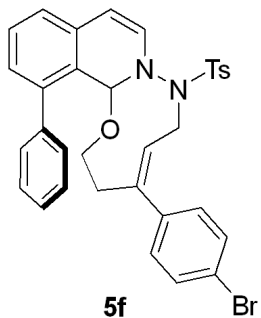

144.94  
144.58  
141.14  
140.92  
140.43  
133.85  
131.49  
131.22  
130.83  
129.84  
129.39  
128.76  
128.26  
128.23  
128.09  
127.74  
127.31  
126.27  
123.86  
121.56  
120.84  
101.55

88.38

77.46  
77.15  
76.83

64.87

47.99

32.91

21.82

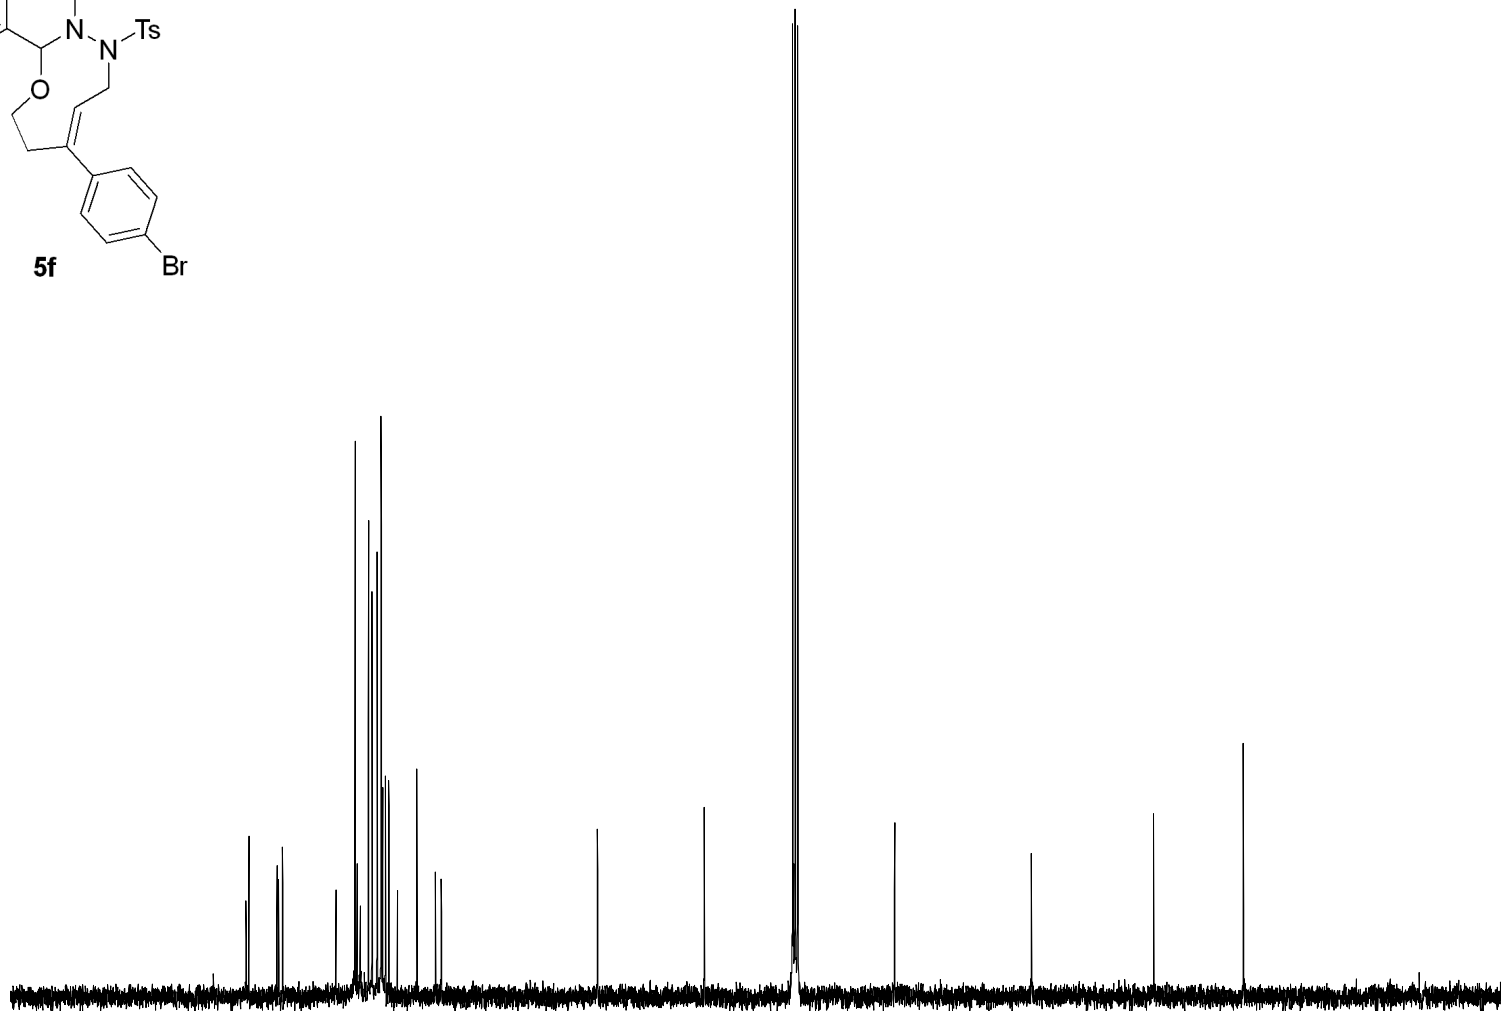

Current Data Parameters  
NAME 2021-4--11Project 1 data  
EXPNO 6  
PROCNO 1

F2 - Acquisition Parameters  
Date\_ 20220531  
Time 20.20 h  
INSTRUM Avance  
PROBHD Z116098\_0833 (  
PULPROG zgpg30  
TD 65536  
SOLVENT CDCl3  
NS 254  
DS 4  
SWH 23809.523 Hz  
FIDRES 0.726609 Hz  
AQ 1.3762560 sec  
RG 53.2129  
DW 21.000 usec  
DE 6.50 usec  
TE 295.2 K  
D1 2.0000000 sec  
D11 0.0300000 sec  
TD0 1  
SFO1 100.6228298 MHz  
NUC1 13C  
P0 3.33 usec  
P1 10.00 usec  
PLW1 87.89900208 W  
SFO2 400.1316005 MHz  
NUC2 1H  
CPDPRG[2] waltz65  
PCPD2 90.00 usec  
PLW2 20.73200035 W  
PLW12 0.25595000 W  
PLW13 0.12874000 W

F2 - Processing parameters  
SI 32768  
SF 100.6127613 MHz  
WDW EM  
SSB 0  
LB 1.00 Hz  
GB 0  
PC 1.40

160 140 120 100 80 60 40 20 ppm

XHL-4-71-H

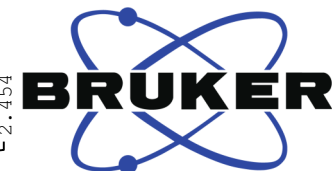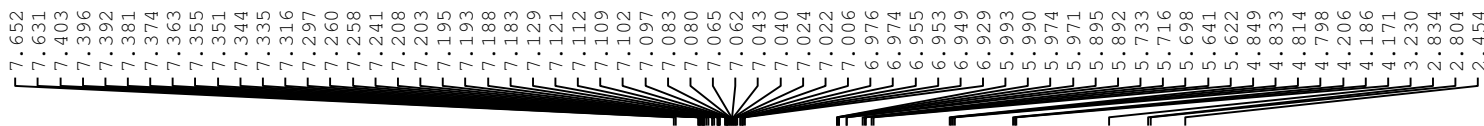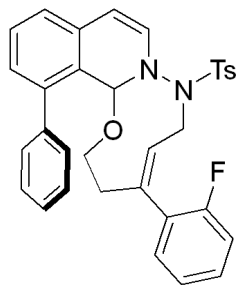

5g

Current Data Parameters  
 NAME 2021-4--11Project 1 data  
 EXPNO 9  
 PROCNO 1

F2 - Acquisition Parameters  
 Date\_ 20220531  
 Time 20.47 h  
 INSTRUM Avance  
 PROBHD Z116098\_0833 (  
 PULPROG zg30  
 TD 65536  
 SOLVENT CDC13  
 NS 16  
 DS 2  
 SWH 8196.722 Hz  
 FIDRES 0.250144 Hz  
 AQ 3.9976959 sec  
 RG 60.6061  
 DW 61.000 usec  
 DE 13.54 usec  
 TE 294.5 K  
 D1 1.0000000 sec  
 TD0 1  
 SFO1 400.1324708 MHz  
 NUC1 1H  
 P0 3.33 usec  
 P1 10.00 usec  
 PLW1 20.73200035 W

F2 - Processing parameters  
 SI 65536  
 SF 400.1300109 MHz  
 WDW EM  
 SSB 0  
 LB 0.30 Hz  
 GB 0  
 PC 1.00

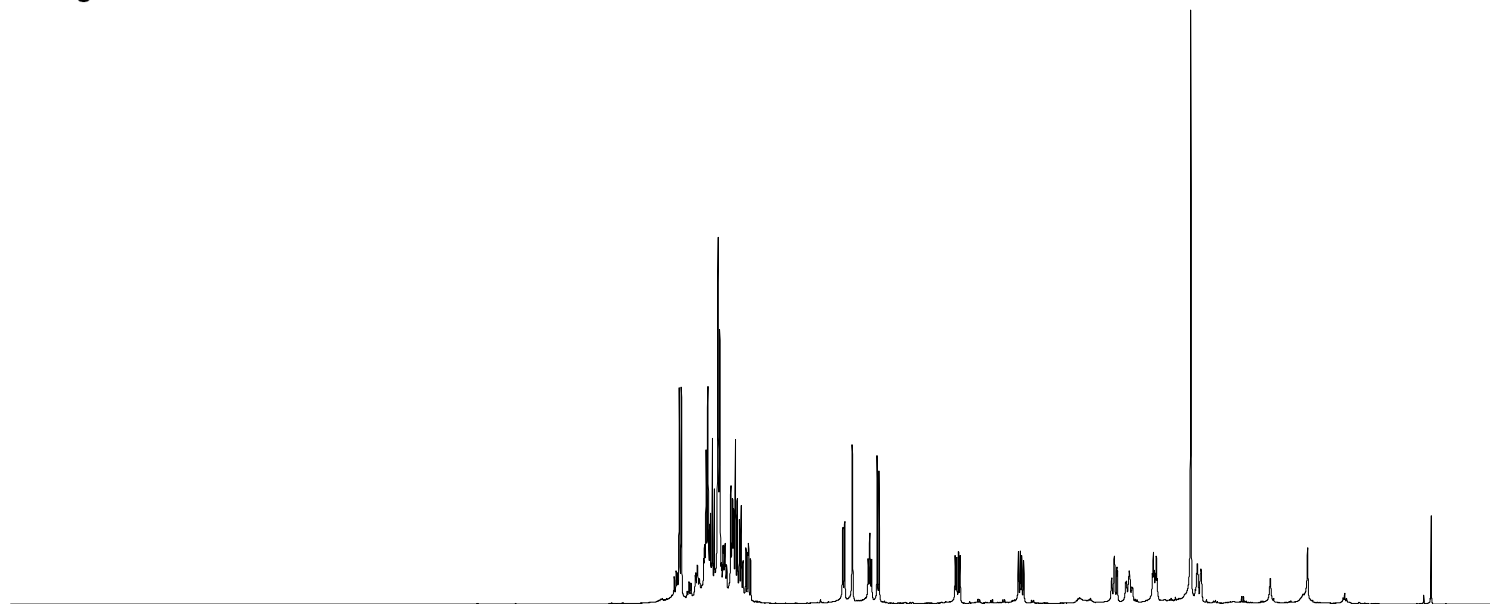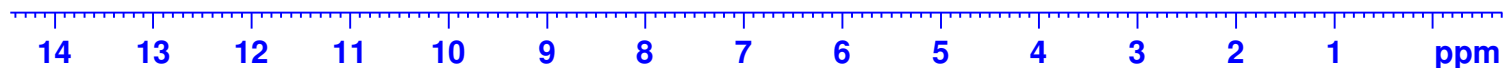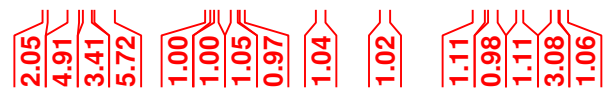

XHL-4-71-C

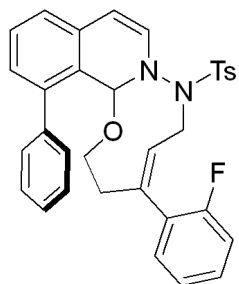

5g

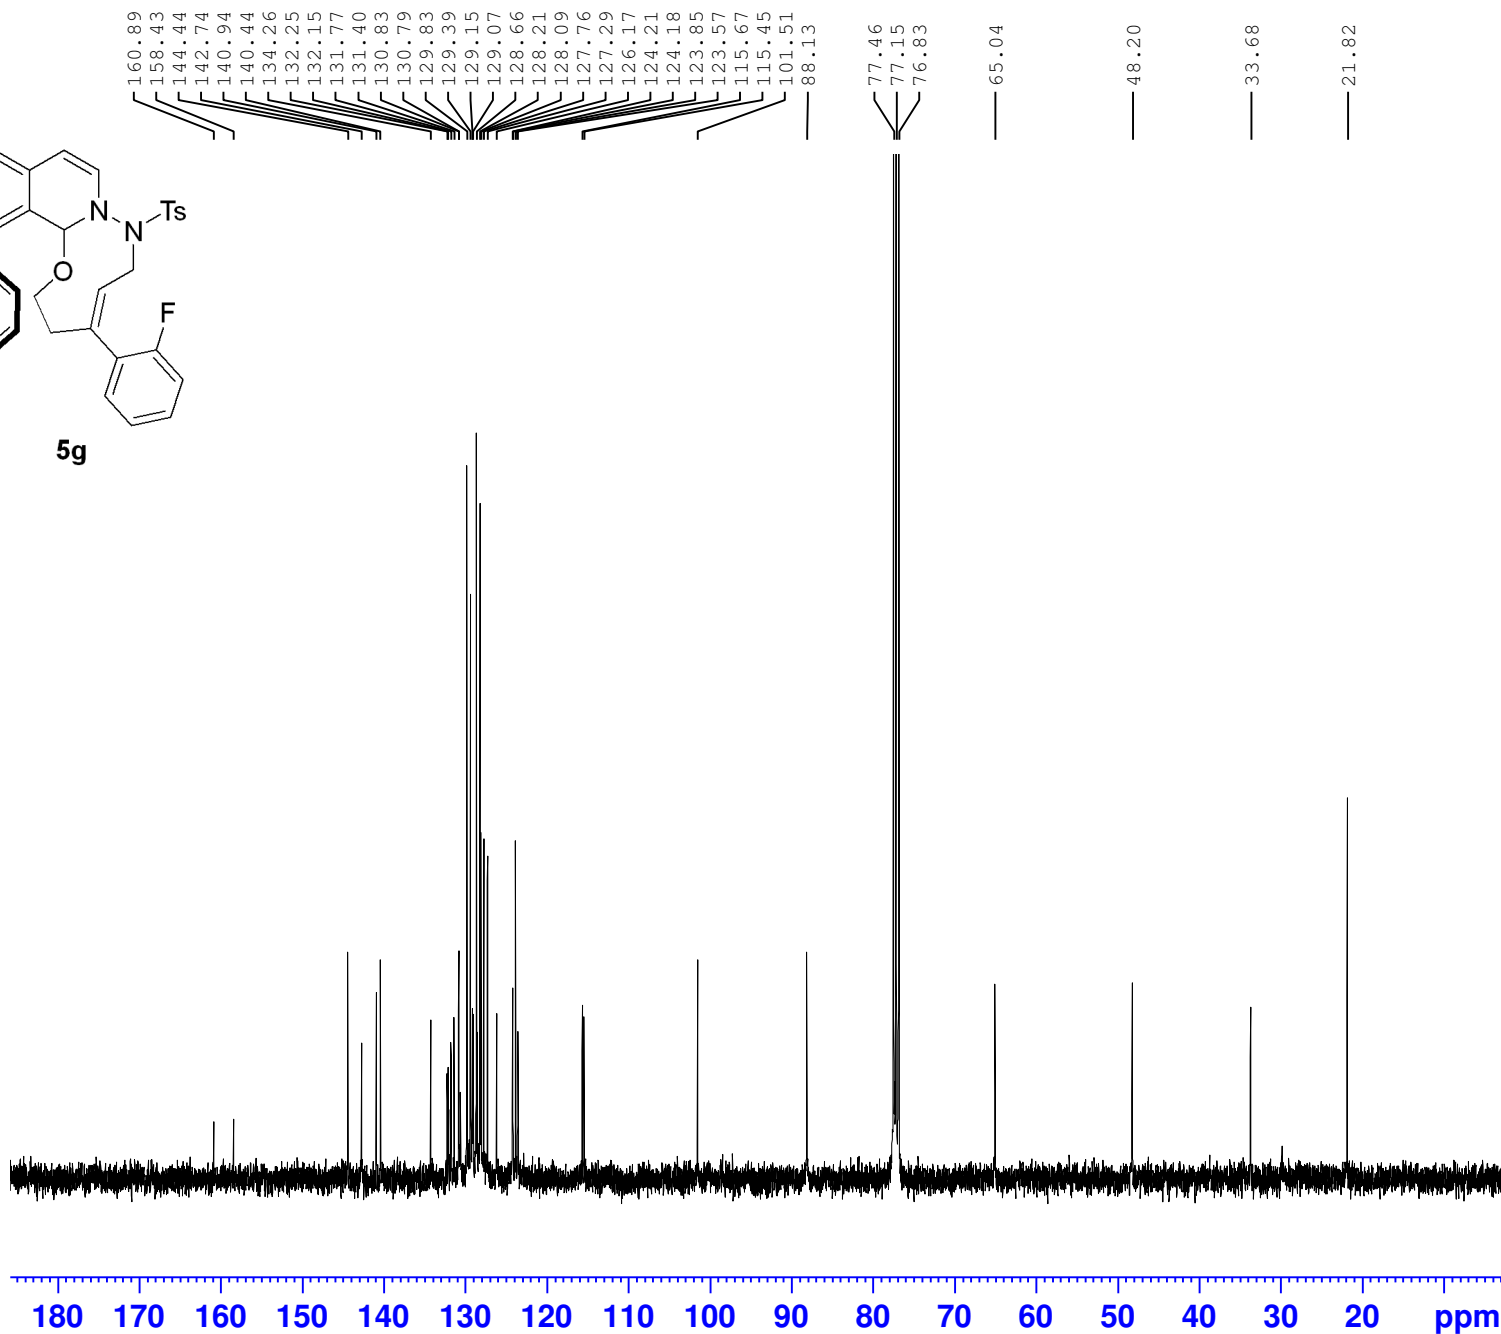

Current Data Parameters  
NAME 2021-4--11Project 1 data  
EXPNO 10  
PROCNO 1

F2 - Acquisition Parameters  
Date\_ 20220531  
Time 21.03 h  
INSTRUM Avance  
PROBHD Z116098\_0833 (  
PULPROG zgpg30  
TD 65536  
SOLVENT CDCl3  
NS 254  
DS 4  
SWH 23809.523 Hz  
FIDRES 0.726609 Hz  
AQ 1.3762560 sec  
RG 49.9878  
DW 21.000 usec  
DE 6.50 usec  
TE 294.8 K  
D1 2.0000000 sec  
D11 0.0300000 sec  
TD0 1  
SFO1 100.6228298 MHz  
NUC1 13C  
P0 3.33 usec  
P1 10.00 usec  
PLW1 87.89900208 W  
SFO2 400.1316005 MHz  
NUC2 1H  
CPDPRG[2] waltz65  
PCPD2 90.00 usec  
PLW2 20.73200035 W  
PLW12 0.25595000 W  
PLW13 0.12874000 W

F2 - Processing parameters  
SI 32768  
SF 100.6127612 MHz  
WDW EM  
SSB 0  
LB 1.00 Hz  
GB 0  
PC 1.40

XHL-4-71

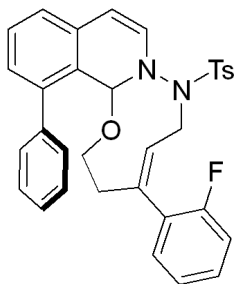

5g

-114.90

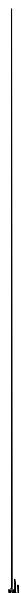

Current Data Parameters  
NAME 220605  
EXPNO 12  
PROCNO 1

F2 - Acquisition Parameters  
Date\_ 20220605  
Time 16.30 h  
INSTRUM Avance  
PROBHD z116098\_0833 (  
PULPROG zgig  
TD 131072  
SOLVENT CDCl3  
NS 16  
DS 4  
SWH 90909.094 Hz  
FIDRES 1.387163 Hz  
AQ 0.7208960 sec  
RG 101  
DW 5.500 usec  
DE 6.50 usec  
TE 298.1 K  
D1 1.00000000 sec  
D11 0.03000000 sec  
TD0 1  
SFO1 376.4607164 MHz  
NUC1 19F  
P1 18.00 usec  
PLW1 16.73100090 W  
SFO2 400.1316005 MHz  
NUC2 1H  
CPDPRG[2] waltz16  
PCPD2 90.00 usec  
PLW2 20.73200035 W  
PLW12 0.25595000 W

F2 - Processing parameters  
SI 65536  
SF 376.4983662 MHz  
WDW EM  
SSB 0  
LB 0.30 Hz  
GB 0  
PC 1.00

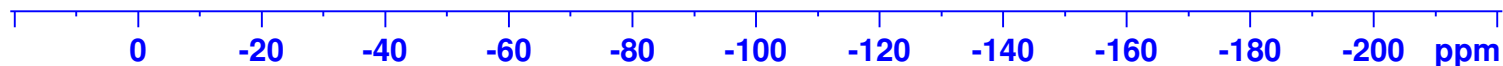

Supplement: d2cc03666e1.pdf [file d2cc03666e1.pdf]
